# Supplementary material for: Divergent functionalization of alkenes enabled by photoredox activation of CDFA and α-halo carboxylic acids
Source: Royal Society of Chemistry journal article supplement (doi:10.1039/d4sc01084a), 2024-01-01
Supplement: d4sc01084a1.pdf [file d4sc01084a1.pdf]

## Supporting Information

### Divergent Functionalization of Alkenes Enabled by Photoredox Activation of CDFA and $\alpha$ -Halo Carboxylic Acids

Rahul Giri,<sup>[a]</sup> Egor Zhilin,<sup>[a]</sup> Dmitry Katayev<sup>[a]\*</sup>

a. University of Bern, Department of Chemistry, Biochemistry, and Pharmaceutical Sciences, Freiestrasse 3, 3012 Bern

\* Corresponding author

Email: [dmitry.katayev@unibe.ch](mailto:dmitry.katayev@unibe.ch)

## Table of contents

|            |                                                              |            |
|------------|--------------------------------------------------------------|------------|
| <b>1.</b>  | <b>Material and methods</b>                                  | <b>3</b>   |
| 1.1.       | <i>High intensity photoreactors</i>                          | 4          |
| <b>2.</b>  | <b>Reaction development</b>                                  | <b>5</b>   |
| 2.1.       | <i>Solvent effect</i>                                        | 5          |
| 2.2.       | <i>Concentration effect</i>                                  | 6          |
| 2.3.       | <i>Equivalents of acid</i>                                   | 7          |
| 2.4.       | <i>Photocatalyst screening</i>                               | 8          |
| 2.5.       | <i>fac-Ir(ppy)<sub>3</sub> loading</i>                       | 9          |
| 2.6.       | <i>Additive screening for lactams</i>                        | 10         |
| 2.7.       | <i>Loading of additive</i>                                   | 10         |
| 2.8.       | <i>Control experiments</i>                                   | 11         |
| 2.9.       | <i>Optimization of hydro gem-difluoro esterification (3)</i> | 12         |
| <b>3.</b>  | <b>General procedures</b>                                    | <b>13</b>  |
| <b>4.</b>  | <b>Availability of starting materials</b>                    | <b>14</b>  |
| <b>5.</b>  | <b>Cyclic voltammetry</b>                                    | <b>15</b>  |
| <b>6.</b>  | <b>Radical trapping experiment</b>                           | <b>22</b>  |
| <b>7.</b>  | <b>Competition experiment</b>                                | <b>23</b>  |
| <b>8.</b>  | <b>Scale-up</b>                                              | <b>24</b>  |
| <b>9.</b>  | <b>Proposed mechanism for product 3</b>                      | <b>26</b>  |
| <b>10.</b> | <b>Computational parameters</b>                              | <b>26</b>  |
| <b>11.</b> | <b>X-Ray Data</b>                                            | <b>51</b>  |
| <b>12.</b> | <b>NMR spectra of isolated compounds</b>                     | <b>69</b>  |
| <b>13.</b> | <b>References</b>                                            | <b>217</b> |

## 1. Material and methods

All reactions were performed in flame-dried glassware under an argon atmosphere containing a teflon-coated stirring bar and dry septum. In addition, glassware was dried overnight at 150 °C before use. Starting materials are commercially available and were purchased from Thermoscientific – Acros, Sigma Aldrich, Apollo Scientific, Fluorochem, and TCI unless otherwise noted. Anhydrous acetonitrile was distilled over CaH<sub>2</sub> and stored over pre-conditioned 3 Å mol sieves for at least 12 h before use. Analytical thin-layer chromatography (TLC) was performed on Merck silica gel 60 F254 TLC glass plates and visualized with 254 nm light and potassium permanganate staining solutions followed by heating when required. Purification of reaction products was carried out by flash chromatography using Brunschwig silica 32-63, 60Å under 0.3-0.5 bar overpressure. Medium pressure liquid chromatography (MPLC) was performed on a CombiFlash R<sub>f</sub>200 System from Teledyne ISCO with a built-in UV-detector and fraction collector or manually using silica gel SilicaFlash P60, 40-63 µm. Teledyne ISCO RediSep Rf flash columns used having 0.035–0.070 mm particle size and 230–400 mesh. Normal phase preparatory HPLC purification was conducted on a Teledyne Isco CombiFlash EZ Prep system using a Macherey-Nagel VP 250/21 Nucleosil 50-5 columns. <sup>1</sup>H- and <sup>13</sup>C-NMR spectra were recorded on Bruker Ultrashield 300 (operating at 300.1 MHz and 75.5 MHz, respectively), Bruker Ascend 400 (operating at 400.1 MHz and 100.6 MHz, respectively), Bruker AVANCE III 500 (operating at 500.1 MHz and 125.6 MHz, respectively), <sup>19</sup>F-NMR spectra on Bruker DPX-300 and Bruker Ultrashield 300 (at 282 MHz) and Bruker DPX-400 and Bruker Ascend 400 (at 376 MHz) Bruker DPX-500 and Bruker AVANCE III 500 (at 477 MHz). The chemical shifts are reported in parts per million (ppm) and coupling constants (*J*) are given in Hertz (Hz). <sup>1</sup>H-NMR spectra are reported with the solvent resonance as the reference unless noted otherwise (CDCl<sub>3</sub> at 7.26 ppm). Peaks are reported as (s = singlet, d = doublet, t = triplet, q = quartet, m = multiplet or unresolved, coupling constant(s) in Hz, integration). <sup>13</sup>C-NMR spectra were recorded with <sup>1</sup>H-decoupling and are reported with the solvent resonance as the reference unless noted otherwise (CDCl<sub>3</sub> at 77.16 ppm). <sup>19</sup>F-NMR spectra were recorded with <sup>1</sup>H-decoupling unless noted otherwise. A Bruker Tensor III spectrometer equipped with a golden gate was used to record infrared spectra HR-MS (ESI<sup>+</sup>) mass spectra were measured on a Bruker FTMS 4.7T BioAPEX II and Thermo Scientific LTQ Orbitrap XL equipped with a static nanospray ion source and mass spectrometry service operated on VG-TRIBRID for electron impact ionization (EI), or Varian IonSpec Spectrometer for electrospray ionization (ESI) and are reported as (*m/z*). Electron impact ionization mass spectra (EI-MS) were run on a gas chromatography – mass spectrometry (GC-MS) instrument of Agilent 8890 series GC system and Agilent 5977B GC/MSD. Single crystals for were made on a RIGAKU Synergy S area-detector diffractometer using mirror optics monochromated Cu K $\alpha$  radiation ( $\lambda = 1.54184 \text{ \AA}$ ). Fluorescence spectroscopy was measured FS5 Spectrofluorometer from Edinburgh Instruments. Cyclic voltammetry was measured using the Osilla potentiostat, an Ag<sup>+</sup> (0.01M AgNO<sub>3</sub>)/Ag reference electrode, a platinum disc working electrode, and a platinum counter electrode. All measurements were carried out in MeCN (0.1 M NBu<sub>4</sub>PF<sub>6</sub>) if not stated otherwise.

## 1.1. High intensity photoreactors

The photoreactor was custom designed and built by Katayev and co-workers in collaboration with the mechanical workshop at the Department of Chemistry and Applied Biosciences at ETH Zürich. It features blue LEDs arranged in a circular pattern, meticulously powered by a 10.3 A power supply, generating 300 W of light. The emitted light spectrum was precisely characterized through UV-Vis spectroscopy (Figure S2). To prevent overheating, the LEDs are water-cooled and equipped with built-in fans to regulate ambient temperature effectively.

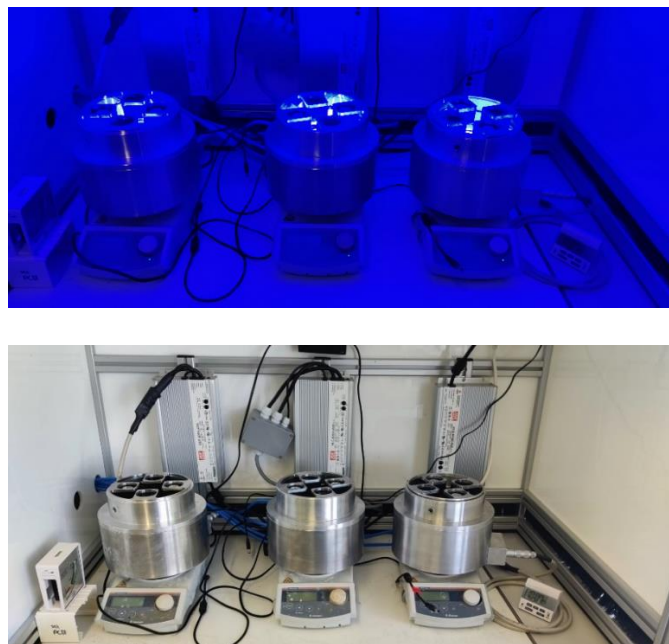

**Figure S1.** Custom high-intensity, blue LED photoreactors for photocatalytic reactions.

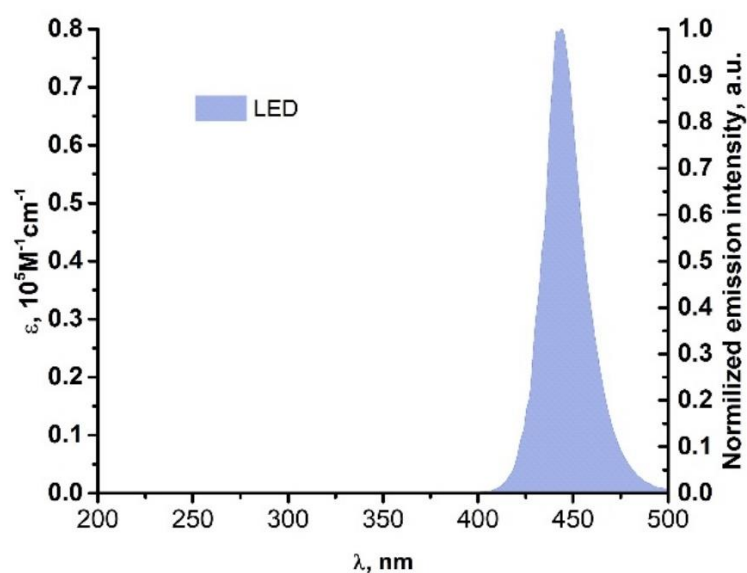

**Figure S2.** UV-Vis emission spectrum of high-intensity, blue LED photoreactor ( $\lambda_{\text{max}} = 440$  nm, FWHM = 20 nm).

## 2. Reaction development

### 2.1. Solvent effect

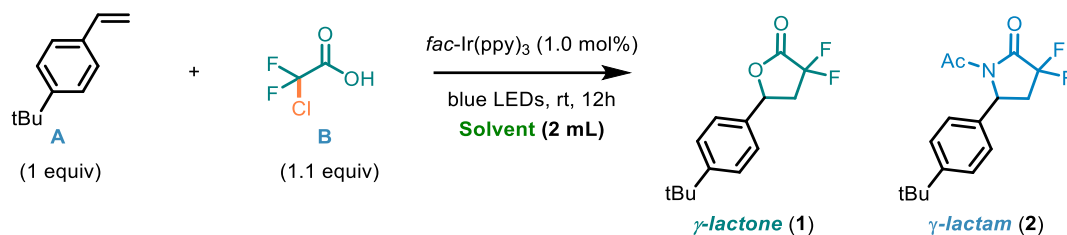

| Entry <sup>[a]</sup> | Solvent                | Yield of 1 [%] <sup>[b]</sup> | Yield of 2 [%] <sup>[b]</sup> |
|----------------------|------------------------|-------------------------------|-------------------------------|
| 1                    | EtOAc                  | 20                            | -                             |
| 2                    | DMF                    | 72                            | -                             |
| 3                    | THF                    | 21                            | -                             |
| 4                    | CHCl <sub>3</sub>      | -                             | -                             |
| 5                    | Isopropanol            | 1                             | -                             |
| 6                    | Et <sub>2</sub> O      | -                             | -                             |
| 7                    | DMSO                   | 60                            | -                             |
| 8                    | DCM                    | 1                             | -                             |
| 9                    | HFIP                   | -                             | -                             |
| 10                   | 1,2 DCE                | -                             | -                             |
| 11                   | Acetone                | -                             | -                             |
| 12                   | MeCN                   | 24                            | 21                            |
| 13                   | Methanol               | 14                            | -                             |
| 14                   | 2,2,2 Trifluoroethanol | -                             | -                             |

**Table S1. a.** Reaction conditions: 4-*tert*-butylstyrene (1.0 equiv), acid B (1.1 equiv), *fac*-Ir(ppy)<sub>3</sub> (1.0 mol%), solvent (0.25 M) **b.** Yield of 1 and 2 are determined by GC against an internal standard of *n*-decane.

## 2.2. Concentration effect

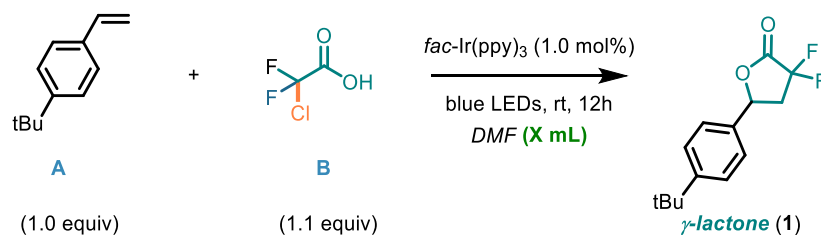

| Entry <sup>[a]</sup> | Substrate [M] | Volume (ml) | Yield of 1 [%] <sup>[b]</sup> |
|----------------------|---------------|-------------|-------------------------------|
| 1                    | 1             | 0.5         | 80                            |
| 2                    | 0.50          | 1           | 82                            |
| 3                    | 0.17          | 3           | 74                            |
| 4                    | 0.10          | 5           | 76                            |
| 5                    | 0.05          | 10          | 78                            |
| 6                    | 0.033         | 15          | 80                            |

**Table S2 a.** Reaction conditions: 4-*tert*-butylstyrene (1.0 equiv), acid B (1.1 equiv), *fac*-Ir(ppy)<sub>3</sub> (1.0 mol%) and DMF(x M).  
**b.** Yield of **1** is determined by GC against an internal standard of *n*-decane.

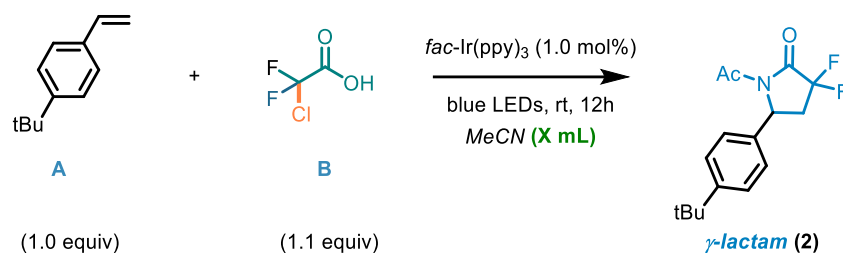

| Entry <sup>[a]</sup> | Substrate [M] | Volume (ml) | Yield of 1 [%] <sup>[b]</sup> | Yield of 2 [%] <sup>[b]</sup> |
|----------------------|---------------|-------------|-------------------------------|-------------------------------|
| 1                    | 1             | 0.5         | 30                            | 13                            |
| 2                    | 0.50          | 1           | 24                            | 26                            |
| 3                    | 0.17          | 3           | 23                            | 29                            |
| 4                    | 0.10          | 5           | 32                            | 23                            |
| 5                    | 0.05          | 10          | 28                            | traces                        |
| 6                    | 0.033         | 15          | 39                            | traces                        |

**Table S3 a.** Reaction conditions: 4-*tert*-butylstyrene (1.0 equiv), acid B (1.1 equiv), *fac*-Ir(ppy)<sub>3</sub> (1.0 mol%) and MeCN (x M).  
**b.** Yield of **1** and **2** are determined by GC against an internal standard of *n*-decane.

### 2.3. Equivalents of acid

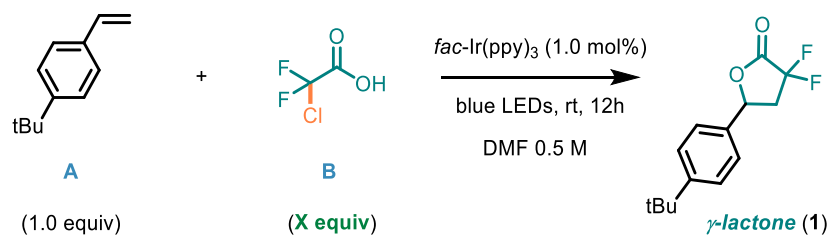

| Entry <sup>[a]</sup> | Equivalent | Yield of <b>1</b> [%] <sup>[a]</sup> |
|----------------------|------------|--------------------------------------|
| 1                    | 1          | 80                                   |
| 2                    | 1.1        | 82                                   |
| 3                    | 1.5        | 90                                   |
| 4                    | 2          | 94                                   |
| 5                    | 3          | 76                                   |
| 6                    | 5          | 78                                   |

**Table S4.** a. Reaction conditions: 4-*tert*-butylstyrene (1.0 equiv), acid B (x equiv),  $fac\text{-Ir(ppy)}_3$  (1.0 mol%) and solvent. b. Yield of **1** is determined by GC against an internal standard of *n*-decane. c. DMF is used as solvent. d. MeCN is used as solvent.

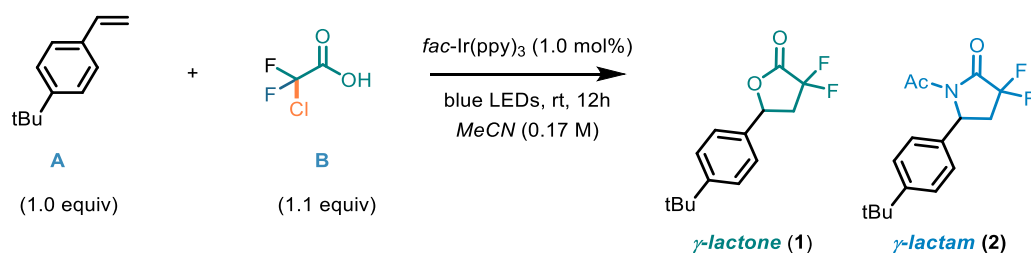

| Entry <sup>[a]</sup> | Equivalent | Yield of <b>1</b> [%] <sup>[b]</sup> | Yield of <b>2</b> [%] <sup>[b]</sup> |
|----------------------|------------|--------------------------------------|--------------------------------------|
| 1                    | 1          | 24                                   | 26                                   |
| 2                    | 1.1        | 23                                   | 29                                   |
| 3                    | 1.5        | 26                                   | 31                                   |
| 4                    | 2          | 21                                   | 33                                   |
| 5                    | 3          | 36                                   | 18                                   |
| 6                    | 5          | 45                                   | 12                                   |

**Table S5.** a. Reaction conditions: 4-*tert*-butylstyrene (1.0 equiv), acid B (x equiv),  $fac\text{-Ir(ppy)}_3$  (1.0 mol%) and MeCN (0.17 M). b. Yield of **1** and **2** are determined by GC against an internal standard of *n*-decane.

## 2.4. Photocatalyst screening

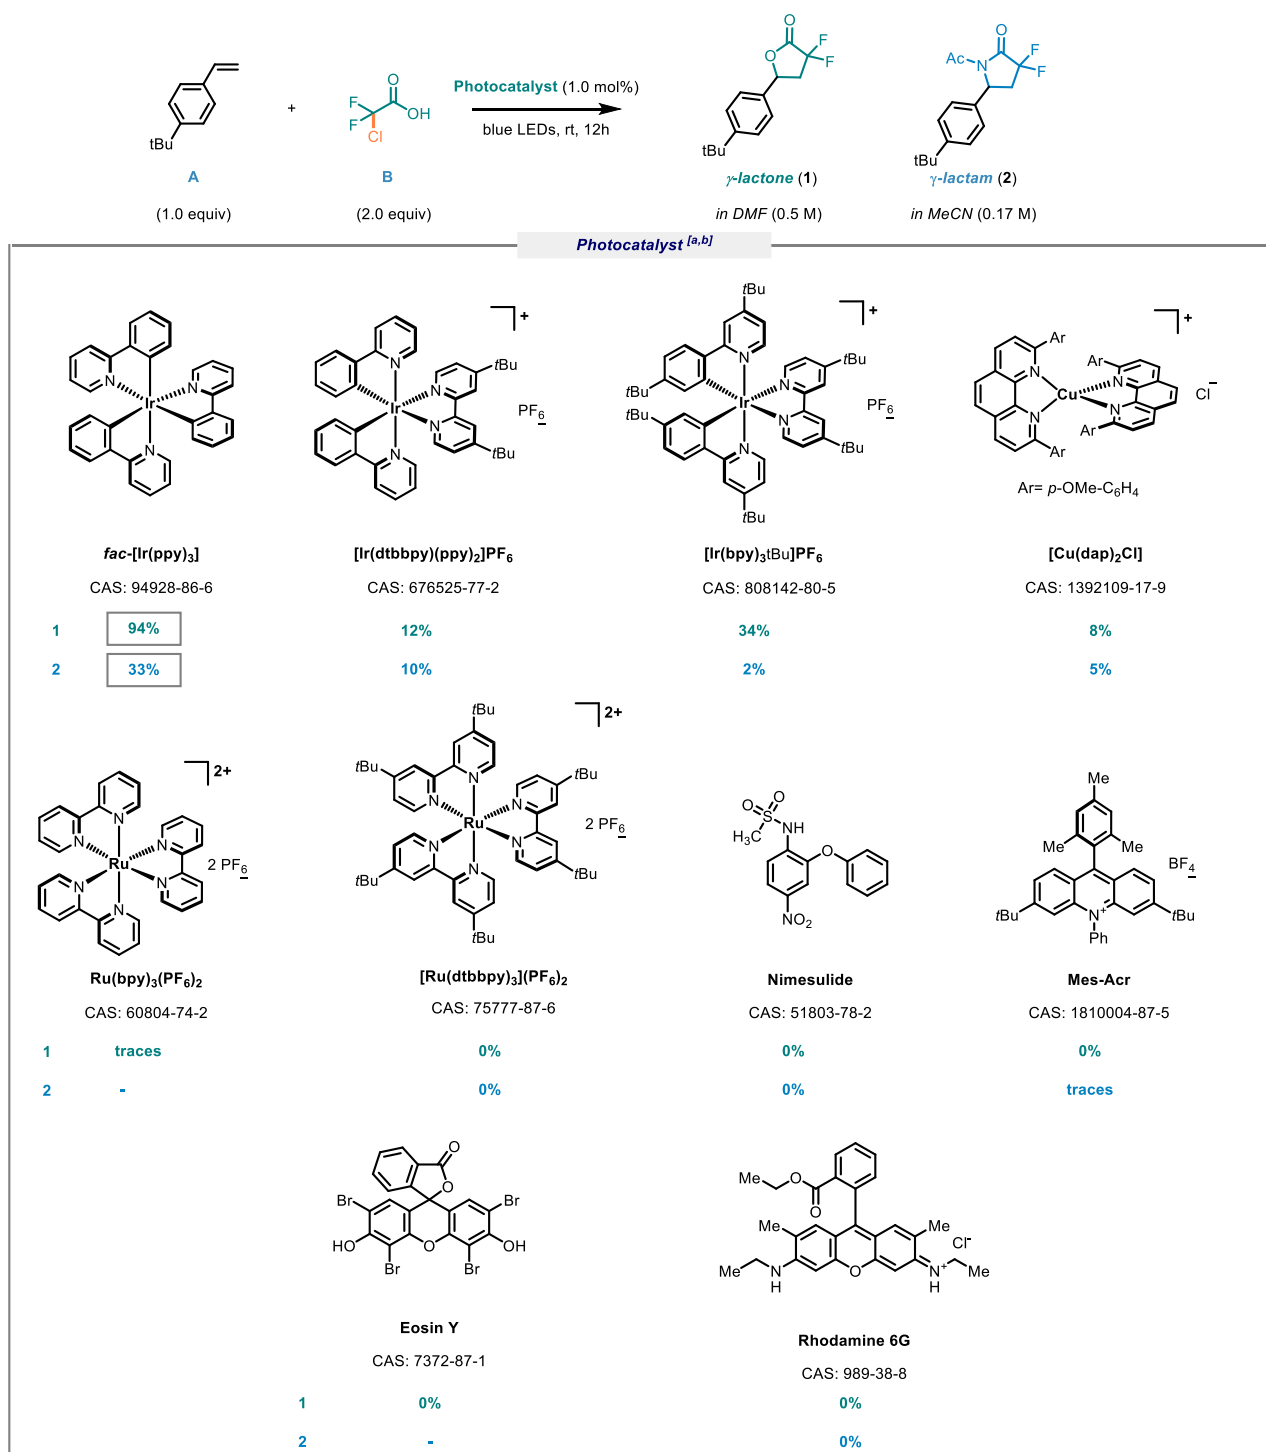

**Table S6. a.** Reaction conditions: 4-*tert*-butylstyrene (1.0 equiv), acid B (2.0 equiv), photocatalyst (1.0 mol%) and solvent. **b.** Yield of **1** and **2** are determined by GC against an internal standard of *n*-decane.



## 2.5. *fac*-Ir(ppy)<sub>3</sub> loading

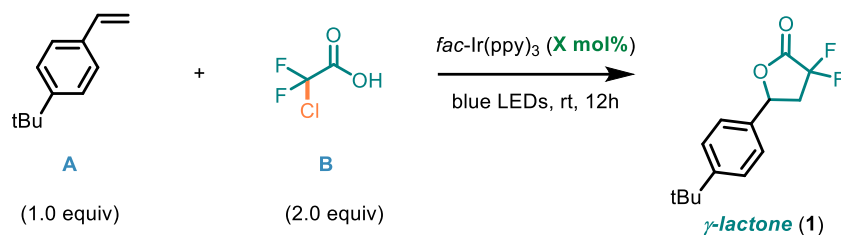

| Entry <sup>[a]</sup> | mol % | Yield of 1 [%] <sup>[b]</sup> |
|----------------------|-------|-------------------------------|
| 1                    | 1     | 94                            |
| 2                    | 2     | 90                            |
| 3                    | 5     | 93                            |
| 4                    | 10    | 91                            |
| 5                    | 50    | 72                            |
| 6                    | 100   | 79                            |

**Table S7. a.** Reaction conditions: 4-*tert*-butylstyrene (1.0 equiv), *acid* B (2.0 equiv), *fac*-Ir(ppy)<sub>3</sub> (1.0 mol%) and solvent. **b.** Yield of **1** is determined by GC against an internal standard of *n*-decane.

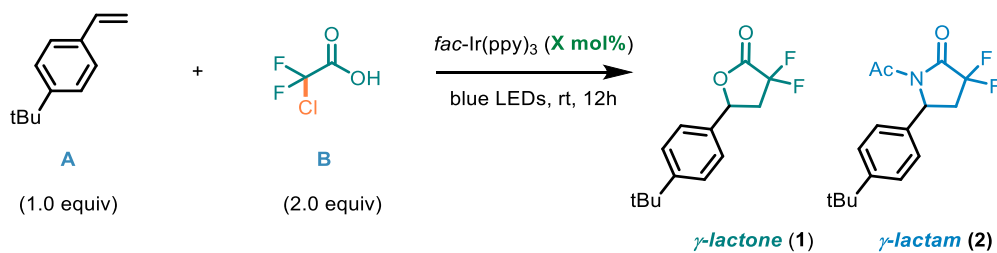

| Entry <sup>[a]</sup> | mol % | Yield of 1 [%] <sup>[b]</sup> | Yield of 2 [%] <sup>[b]</sup> |
|----------------------|-------|-------------------------------|-------------------------------|
| 1                    | 1     | 21                            | 33                            |
| 2                    | 2     | 24                            | 26                            |
| 3                    | 5     | 25                            | 29                            |
| 4                    | 10    | 31                            | 36                            |
| 5                    | 50    | 30                            | 24                            |
| 6                    | 100   | 24                            | 12                            |

**Table S8. a.** Reaction conditions: 4-*tert*-butylstyrene (1.0 equiv), *acid* B (2.0 equiv), *fac*-Ir(ppy)<sub>3</sub> (1.0 mol%) and solvent. **b.** Yield **1** of **2** are determined by GC against an internal standard of *n*-decane.

## 2.6. Additive screening for lactams

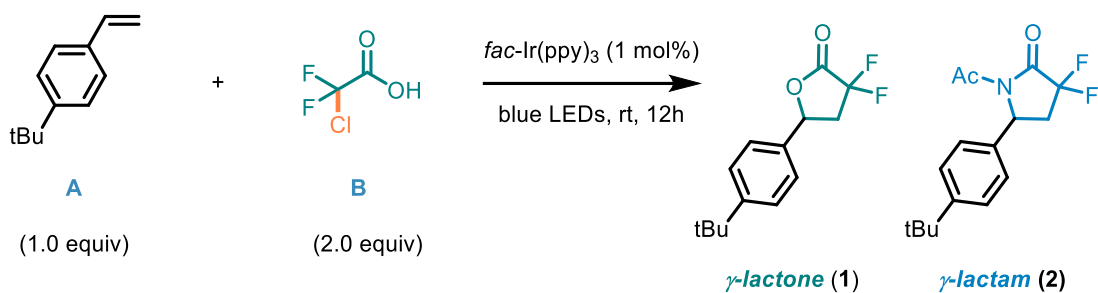

### Additive (4 equiv)

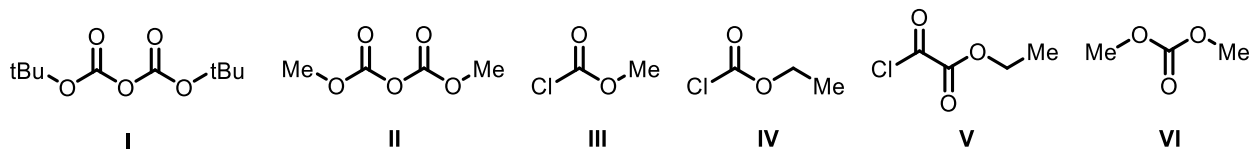

| Entry <sup>[a]</sup> | Additive | Yield of 1 [%] <sup>[b]</sup> | Yield of 2 [%] <sup>[b]</sup> |
|----------------------|----------|-------------------------------|-------------------------------|
| 1                    | I        | 18                            | 49                            |
| 2                    | II       | 35                            | 38                            |
| 3                    | III      | 9                             | 5                             |
| 4                    | IV       | 10                            | 7                             |
| 5                    | V        | 10                            | 10                            |
| 6                    | VI       | 3                             | traces                        |

**Table S9. a.** Reaction conditions: 4-*tert*-butylstyrene (1.0 equiv), acid B (2.0 equiv), *fac*-Ir(ppy)<sub>3</sub> (1.0 mol%) and MeCN (0.17 M). **b.** Yield of 1 and 2 are determined by GC against an internal standard of *n*-decane.

## 2.7. Loading of additive

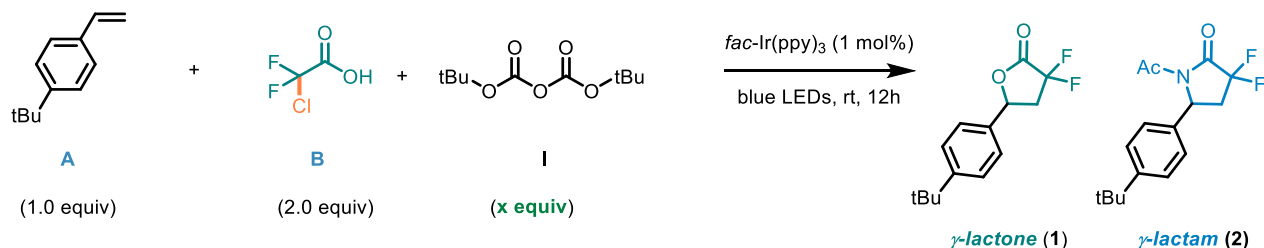

| Entry <sup>[a]</sup> | Equivalent | Yield of 1 [%] <sup>[b]</sup> | Yield of 2 [%] <sup>[b]</sup> |
|----------------------|------------|-------------------------------|-------------------------------|
| 1                    | 0.5        | 17                            | 35                            |
| 2                    | 1.0        | 13                            | 54                            |
| 3                    | 2.0        | 9                             | 58                            |
| 4                    | 3.0        | 10                            | 51                            |
| 5                    | 5.0        | 16                            | 46                            |
| 6                    | 10.0       | 9                             | 12                            |

**Table S10. a.** Reaction conditions: 4-*tert*-butylstyrene (1.0 equiv), acid B (2.0 equiv), *fac*-Ir(ppy)<sub>3</sub> (1.0 mol%) and MeCN (0.17 M). **b.** Yield of 1 and 2 are determined by GC against an internal standard of *n*-decane.

## 2.8. Control experiments

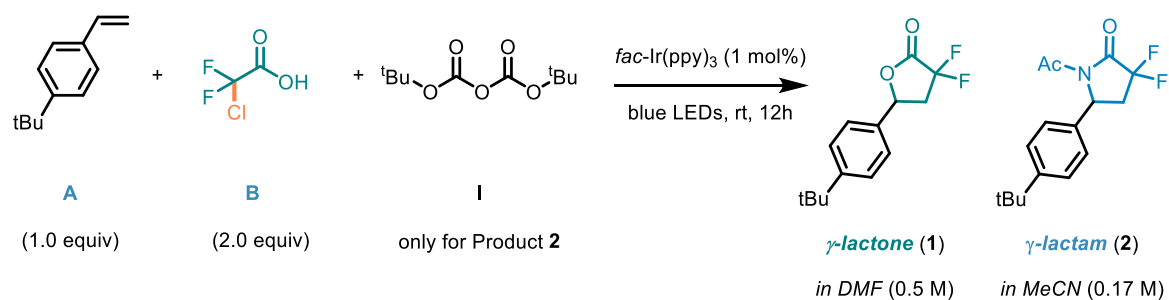

| Entry <sup>[a]</sup> | Deviation from standard conditions | Yield of 1 [%] <sup>[b,c]</sup> | Yield of 2 [%] <sup>[b,d]</sup> |
|----------------------|------------------------------------|---------------------------------|---------------------------------|
| 1                    | No deviation                       | 94                              | 58                              |
| 2                    | No light                           | 0                               | 0                               |
| 3                    | No PC                              | 0                               | 0                               |
| 4                    | No light and no PC                 | 0                               | 0                               |
| 5                    | Heating at 70 °C                   | 0                               | 0                               |
| 6                    | H <sub>2</sub> O 2 eq              | traces                          | complex mixture                 |
| 7                    | H <sub>2</sub> O 20 eq             | traces                          | complex mixture                 |
| 8                    | Without degassing                  | 86                              | 12                              |
| 9                    | I added initially                  | -                               | 57                              |
| 10                   | B and I premixed for 12 h          | -                               | 48                              |

**Table S11. a.** Reaction conditions: 4-*tert*-butylstyrene (1.0 equiv), *acid* B (2.0 equiv), *fac*-Ir(ppy)<sub>3</sub> (1.0 mol%) and solvent. **b.** Yield of **1** and **2** are determined by GC against an internal standard of *n*-decane. **c.** DMF is used as solvent. **d.** MeCN is used as solvent.

## 2.9. Optimization of hydro *gem*-difluoro esterification (3)

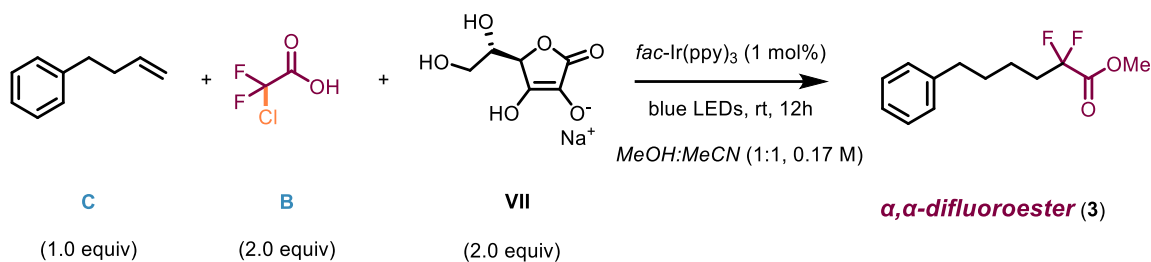

| Entry <sup>[a]</sup> | Deviation from standard conditions          | Yield of <b>2</b> [%] <sup>[b,d]</sup> |
|----------------------|---------------------------------------------|----------------------------------------|
| 1                    | No deviation                                | 79                                     |
| 2                    | No light                                    | 0                                      |
| 3                    | No PC                                       | 0                                      |
| 4                    | No light and no PC                          | 0                                      |
| 5                    | Heating at 70 °C                            | 0                                      |
| 6                    | Without <b>VII</b>                          | complex mixture                        |
| 7                    | Without MeOH                                | complex mixture                        |
| 8                    | Without MeCN                                | 65                                     |
| 9                    | Hantsch Ester insted of <b>VII</b>          | 43                                     |
| 10                   | Ascorbic acid insted of <b>VII</b>          | 51                                     |
| 11                   | Bromodifluoroacetic acid insted of <b>B</b> | 75                                     |

**Table S12.** a. alkene **C** (1 equiv), *fac*-Ir(ppy)<sub>3</sub> (1.0 mol%), CDFA (2 equiv), **VII** (2 equiv), MeOH: MeCN (1:1 v/v), blue LEDs, rt, 12 h. b. Yield of **3** is determined by GC against an internal standard of *n*-decane.

### 3. General procedures

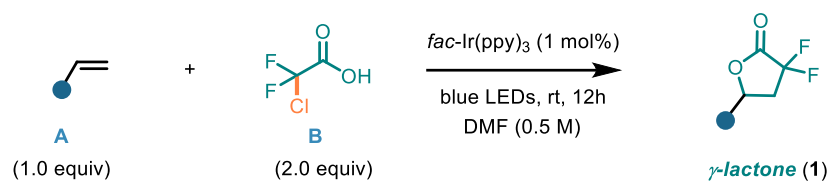

**Procedure 1:** A flame dried 8 mL crimp cap vial was charged with *fac*-[Ir(ppy)<sub>3</sub>] (3.3 mg, 5  $\mu$ mol, 1.0 mol%) and equipped with a magnetic bar. The contents of the vial were then subjected to three vacuum/argon cycles. Anhydrous DMF (1 mL) was added under an N<sub>2</sub> atmosphere, and the solution was degassed for 1 min. The substrate<sup>[a]</sup> (0.5 mmol, 1.0 equiv) and CDFA (88  $\mu$ L, 1.0 mmol, 2.0 equiv) were introduced to the solution *via* microsyringes. The reaction mixture was irradiated at room temperature under blue LEDs for 12 h. Reaction contents were added to an appropriately sized separatory funnel and 10 mL EtOAc was added and washed with water (3 $\times$ 5) mL; further organic layer was washed with 5 mL brine, dried over Na<sub>2</sub>SO<sub>4</sub>, filtered, and concentrated under reduced pressure. The residue was purified by flash column chromatography or manually over silica gel as indicated to afford  $\gamma$ -lactone derivatives.

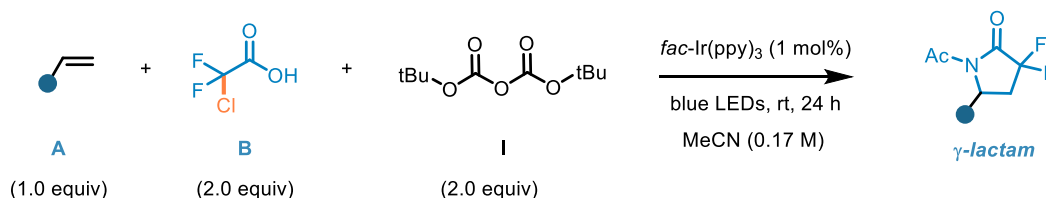

**Procedure 2:** A flame dried 8 mL crimp cap vial was charged with *fac*-[Ir(ppy)<sub>3</sub>] (3.3 mg, 5.0  $\mu$ mol, 1.0 mol%) and equipped with a magnetic bar. The contents of the vial were then subjected to three vacuum/argon cycles. Anhydrous DMF (3 mL) was added under an N<sub>2</sub> atmosphere, and the solution was sparged for 4 min. The substrate<sup>[a]</sup> (0.5 mmol, 1.0 equiv) and CDFA (88  $\mu$ L, 1.0 mmol, 2.0 equiv) were introduced to the solution *via* microsyringes. The reaction mixture was irradiated at room temperature under blue LEDs for 24 h. The solvent was evaporated under reduced pressure, and the crude product was purified by flash column chromatography or manually over silica gel as indicated to get  $\gamma$ -lactams.

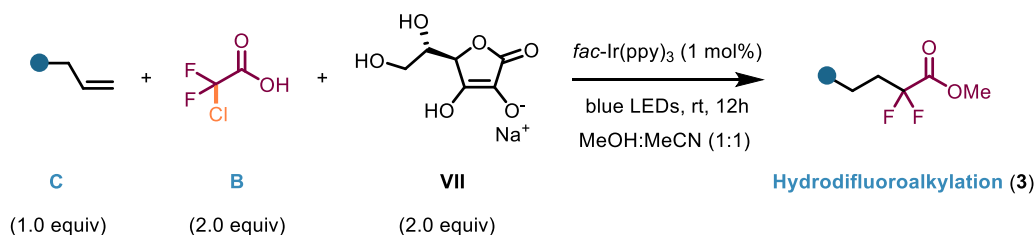

**Procedure 3:** A flame dried 8 mL crimp cap vial was charged with *fac*-[Ir(ppy)<sub>3</sub>] (3.3 mg, 5.0  $\mu$ mol, 1.0 mol%), sodium ascorbate (1.0 mmol, 2 equiv) and equipped with a magnetic bar. The contents of the vial were then subjected to three vacuum/argon cycles. Anhydrous MeOH (1.5 mL) and MeCN (1.5 mL) was added under an N<sub>2</sub> atmosphere, and the solution was sparged for 4 min. The substrate<sup>[a]</sup> (0.5 mmol, 1.0 equiv) and CDFA (88  $\mu$ L, 1.0 mmol, 2.0 equiv) were introduced to the solution *via* microsyringes. The reaction mixture was irradiated at room temperature under blue LEDs for 12 h. The solvent was evaporated under reduced pressure, and the crude product was filtered on celite with DCM, the obtained solution was evaporated under reduced pressure and crude was purified by flash column chromatography or manually over silica gel as indicated to obtain hydro gem-difluoro esters.

[a] solid olefins were added after photocatalyst and then the crimp vials were sealed.

## 4. Availability of starting materials

### Commercially available starting materials.

Commercially available starting materials were purchased from Thermoscientific – Acros, Sigma Aldrich, Apollo Scientific, Fluorochem and TCI or Chemie-brunschwig.

### Olefins:

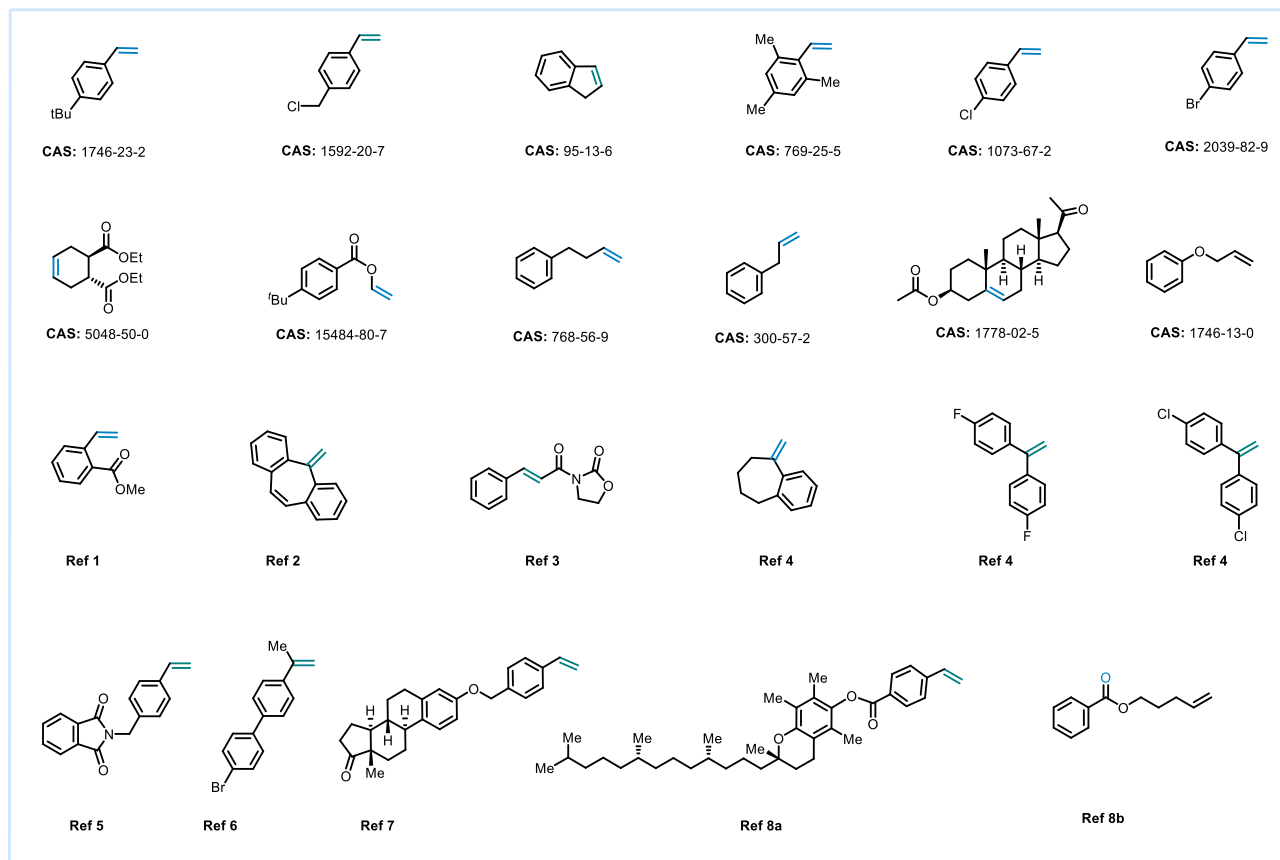

Figure S3. Source of olefins

### Acids:

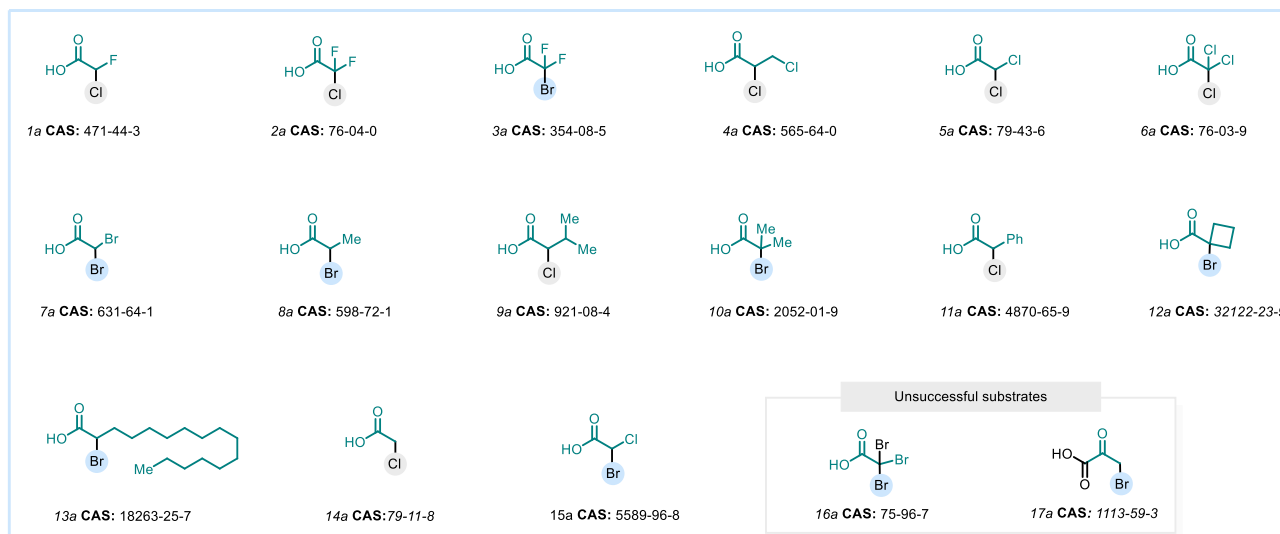

Figure S4. Source of acids

## 5. Cyclic voltammetry

### Cyclic voltammetry data for halogenated acids

In a volumetric flask, 1.94 g (5.0 mmol, 0.1 M) of  $\text{NBu}_4\text{PF}_6$  was dissolved in 50 mL of anhydrous acetonitrile. The solution was then degassed for 20 minutes by bubbling  $\text{N}_2$ . For each measurement, 10 mL of the solution was transferred to the cyclic voltammetric cell, followed by the addition of 0.1 mmol of analyte. The resulting solution was stirred for 1 minute to ensure homogeneity. Prior to each measurement, the solution was purged with Ar, and the glassy carbon electrode was rotated to homogenize the probe solution. Throughout the measurement process, the solution was shielded by a positive  $\text{N}_2$  stream (Figure S5).

The cyclic voltammetry setup comprised a Pt-counter electrode and an  $\text{Ag}^+/\text{Ag}$  reference electrode (0.01 M  $\text{AgNO}_3$  in 0.1 M  $\text{NBu}_4\text{PF}_6$ ). The working electrode selected was a Pt disc electrode with a diameter of 2 mm. An overview of cyclic voltammetry was referenced from the provided sources. Typically, a scan rate of 100 mV/s was employed to measure the reaction components.

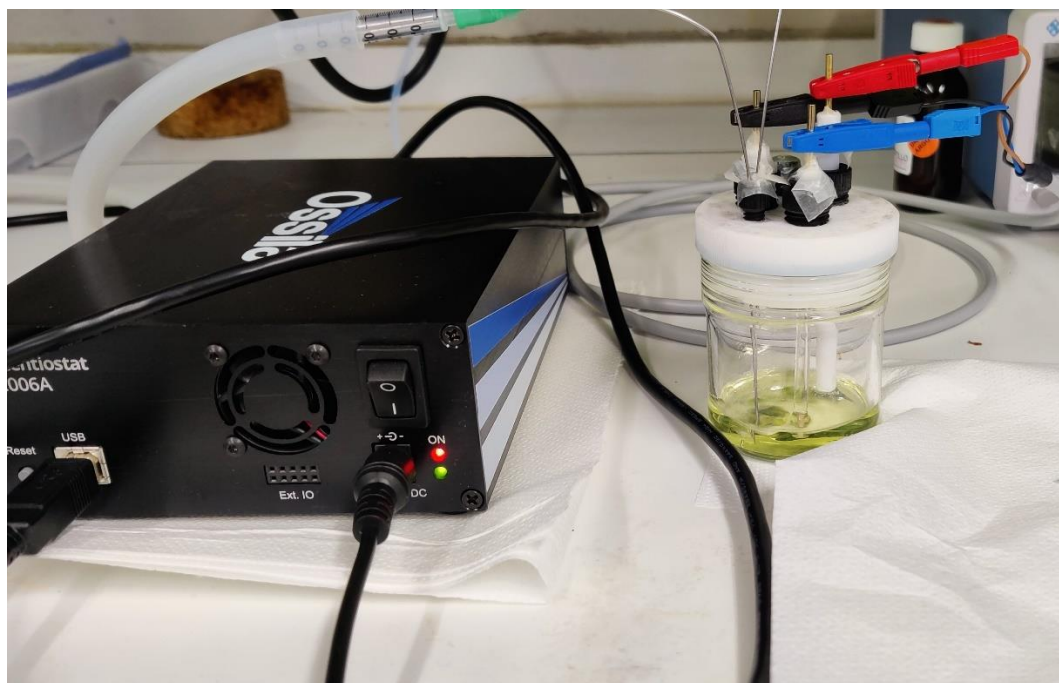

**Figure S5.** Cyclic voltammetry setup using ossila source measure unit.

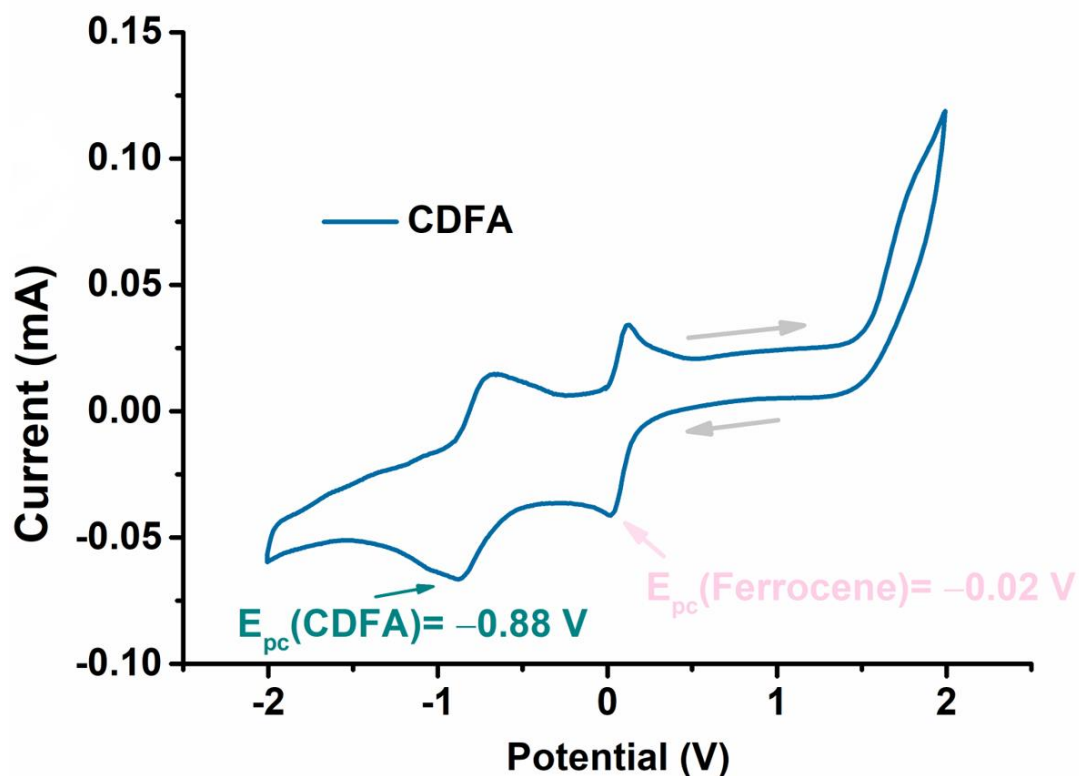

Figure S6. Cyclic voltammogram of chlorodifluoroacetic acid (CDFA, 0.1 mmol vs Ag/AgNO<sub>3</sub>), scan rate 100 mV/s.

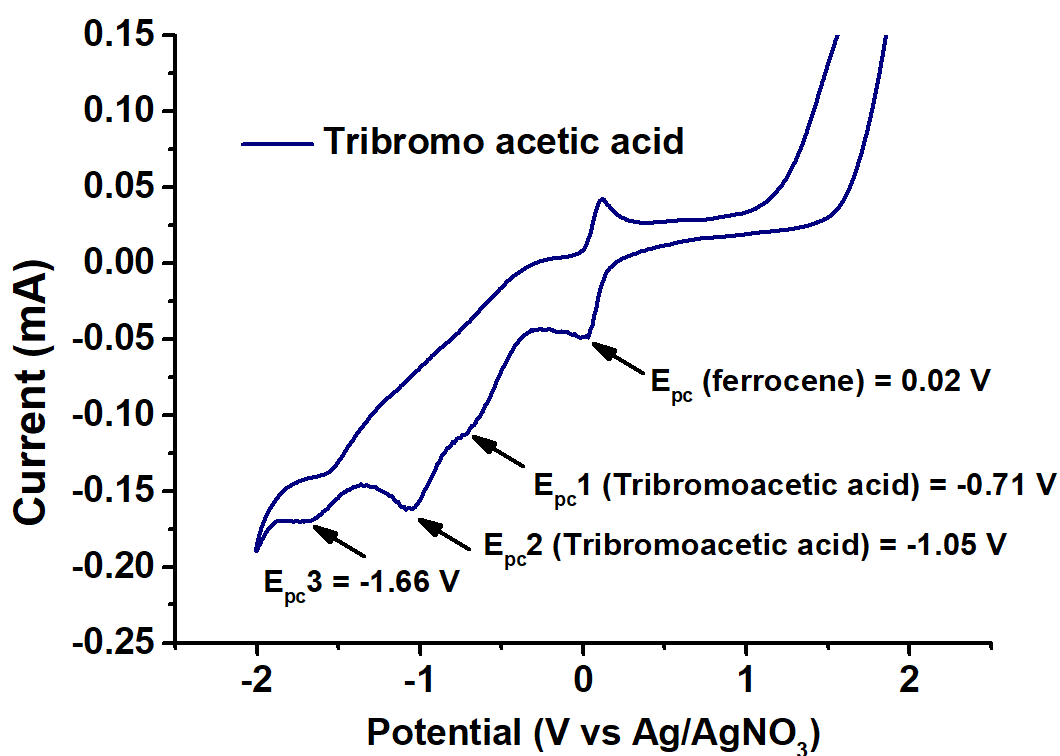

Figure S7. Cyclic voltammogram of tribromoacetic acid (0.1 mmol), scan rate 100 mV/s.



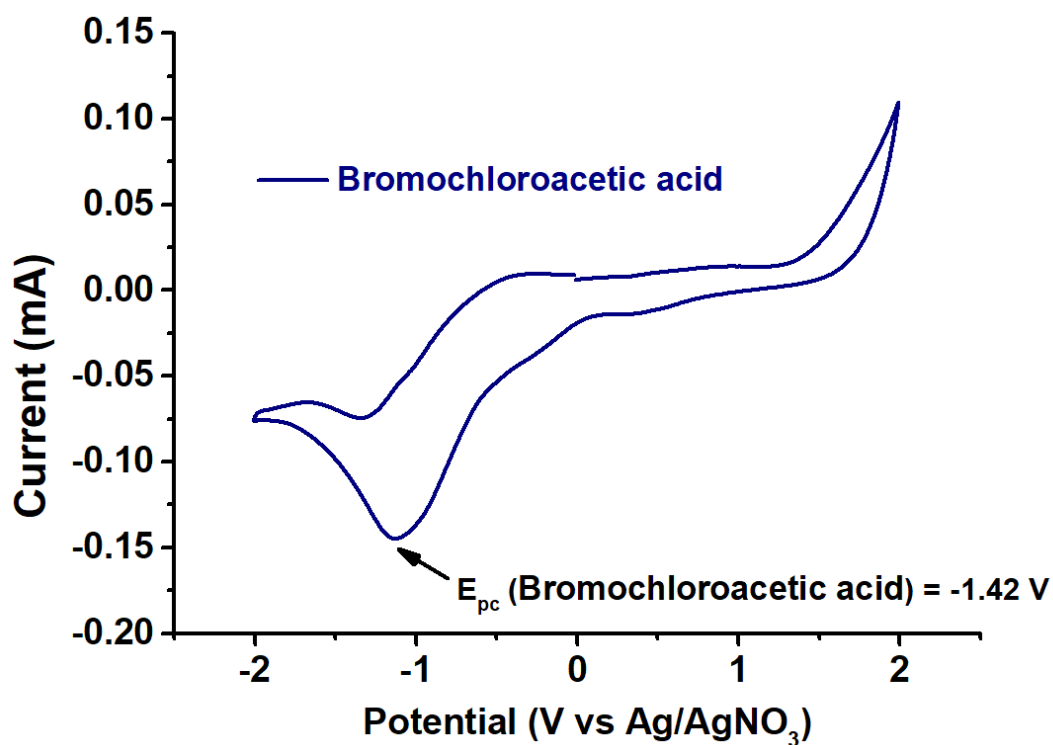

Figure S8. Cyclic voltammogram of bromochloroacetic acid (0.1 mmol), scan rate 100 mV/s.

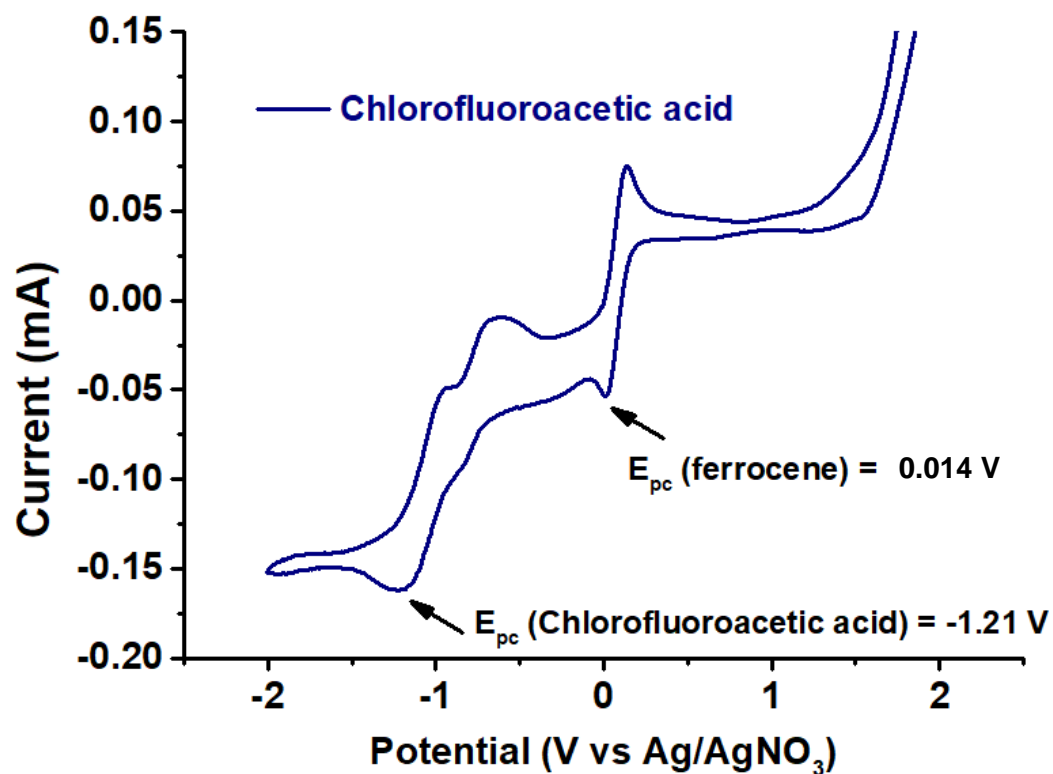

Figure S9. Cyclic voltammogram of chlorofluoroacetic acid (0.1 mmol), scan rate 100 mV/s.

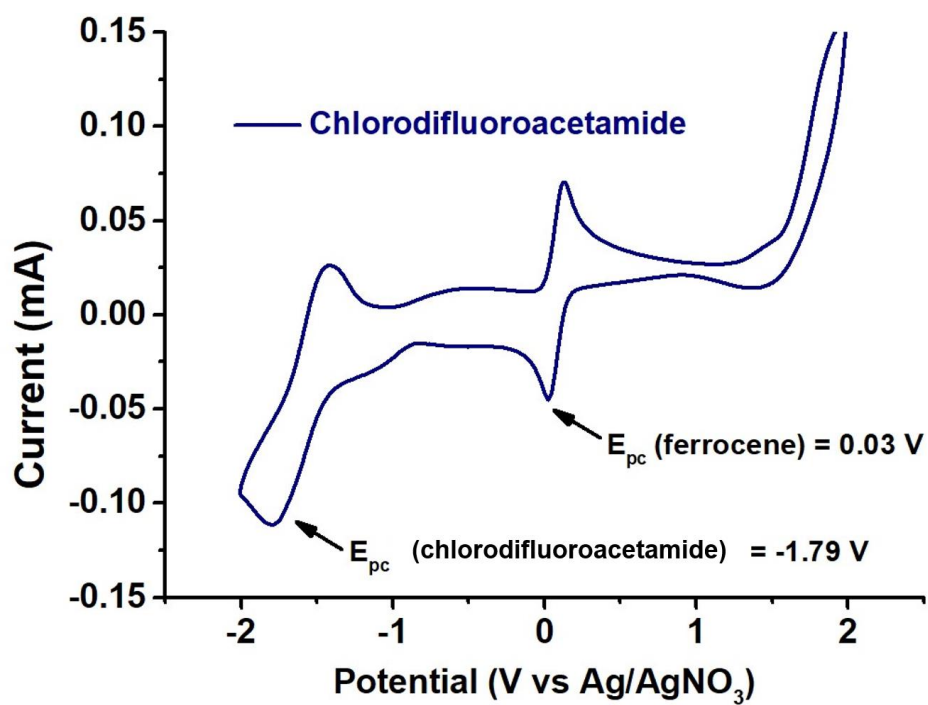

**Figure S10.** Cyclic voltammogram of chlorodifluoroacetamide (0.1 mmol), scan rate 100 mV/s.

## 6. Stern-Volmer quenching studies

To explore the dynamics of the excited state, we conducted Stern-Volmer quenching studies. The quenching efficiency, as defined by Stern and Volmer.

$$(I_0/I) - 1 = k_q\tau_0[\text{quencher}]$$

Where  $I_0$  is the luminescence intensity in the absence of any quencher,  $I$  is the luminescence intensity in the presence of a predefined quencher concentration while  $\tau_0$  is the excited state lifetime of photocatalyst which has been previously reported as  $1.90 \times 10^{-6}$  s for *fac*-Ir(ppy)<sub>3</sub> in acetonitrile at 25 °C).<sup>[9-11]</sup>

### Preparation of stock solutions for Stern-Volmer measurements

A stock solution of the photocatalyst was prepared by dissolving 0.33 mg *fac*-Ir(ppy)<sub>3</sub> (0.499  $\mu$ mol, 50  $\mu$ M) in oxygen- and water-free 10 mL DMF under argon. A 2.5 mM stock solution was prepared for each component of the reaction in 10 mL of DMF, including chlorodifluoroacetic acid, 4-*tert*-butylstyrene, and Boc anhydride.

For evaluation of the quenching ability of chlorodifluoroacetic acid, 4-*tert*-butylstyrene and Boc anhydride, samples of *fac*-Ir(ppy)<sub>3</sub> and the reagent were prepared under argon in dark. Photocatalyst stock solution (1.5 mL) was added to quartz cuvettes (1.5 mL, 10 mm x 4 mm, PTFE cap), followed by the appropriate amount of reagent stock solution. All samples have been kept in the dark and were only taken out for measurements. Fluorescence Emission spectra were acquired as fast as possible after sample preparation (excitation at  $430 \pm 2$  nm, 1 nm steps, excitation slit, and emission slit: 2 nm).

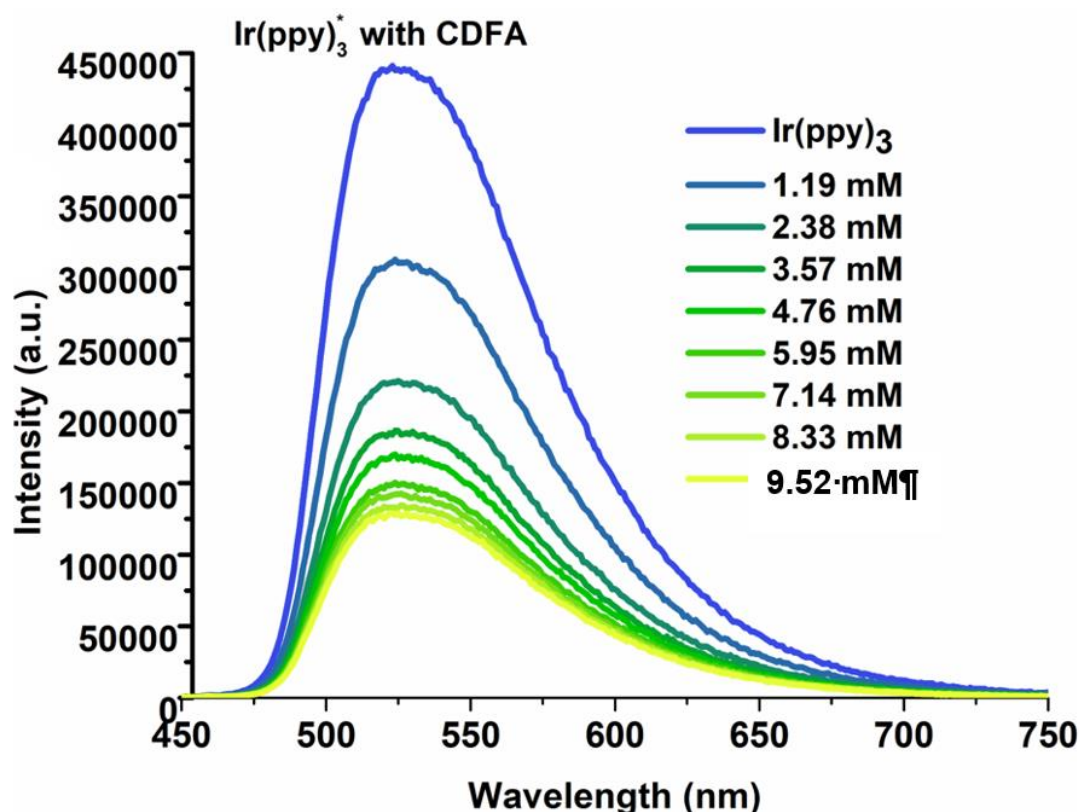

**Figure S11.** Emission quenching of *fac*-Ir(ppy)<sub>3</sub> with CDFA in DMF (50  $\mu$ M *fac*-Ir(ppy)<sub>3</sub>). In DMF) 20°C,  $d_{em} = 2$  nm,  $d_{ex} = 2$  nm,  $\lambda_{ex} = 430$  nm,  $\lambda_{em} = 450-450$  nm).

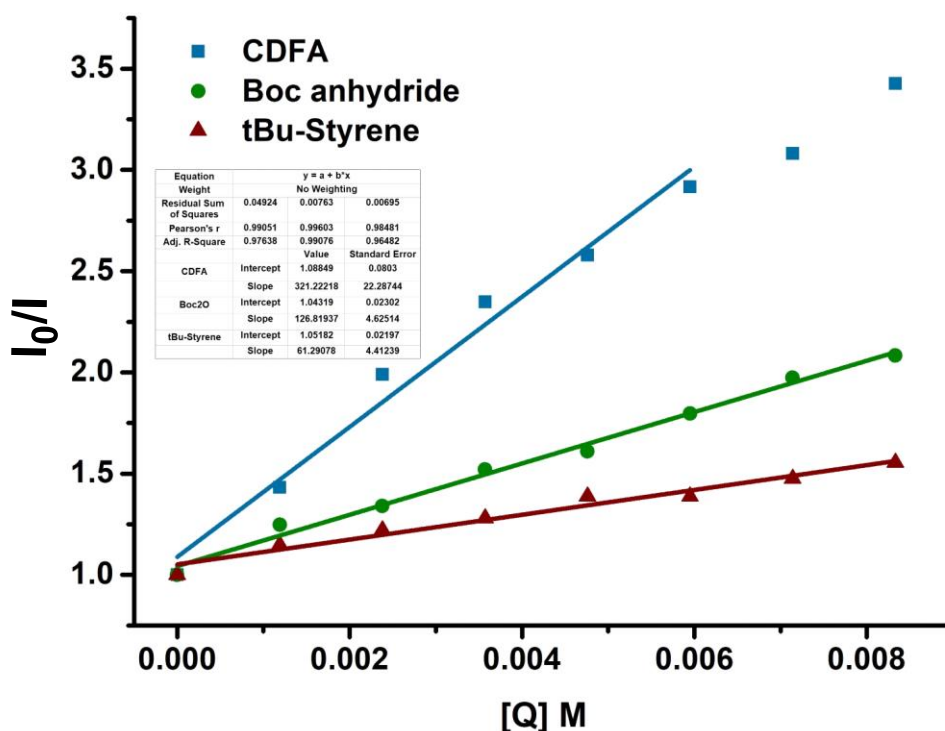

**Figure S12.** Correlation between emission intensity and concentration of reaction components.

First, the influence on the emission spectrum of the catalyst by *CDFA* was investigated. The emission quenching data clearly show that quenching of the excited state of the catalyst by *CDFA* is highly efficient and happening with a calculated quenching constant of  $k_q = 2.0 \times 10^8 \text{ M}^{-1}\text{s}^{-1}$  (Figures S11 and S12). Calculation of the quenching constants was performed for *CDFA* according to the following equation:

$$(I_0 \div I) - 1 = k_q \tau_0 [\text{quencher}]$$

$$\text{Where } \tau_0 = 1.90 \times 10^{-6} \text{ s}$$

$$\text{Thus } k_q \tau_0 = 321$$

$$k_q = 1.7 \times 10^8 \text{ M}^{-1} \text{ s}^{-1}$$

Later on, the quenching experiment was replicated independently with *tBu-styrene* and *Boc anhydride* as quenchers. It was observed that in the presence of these substrates, the quenching of the catalyst's excited state was less pronounced, suggesting an inability to effectively compete with the efficient quenching caused by *CDFA* (Figure S13 and S14).

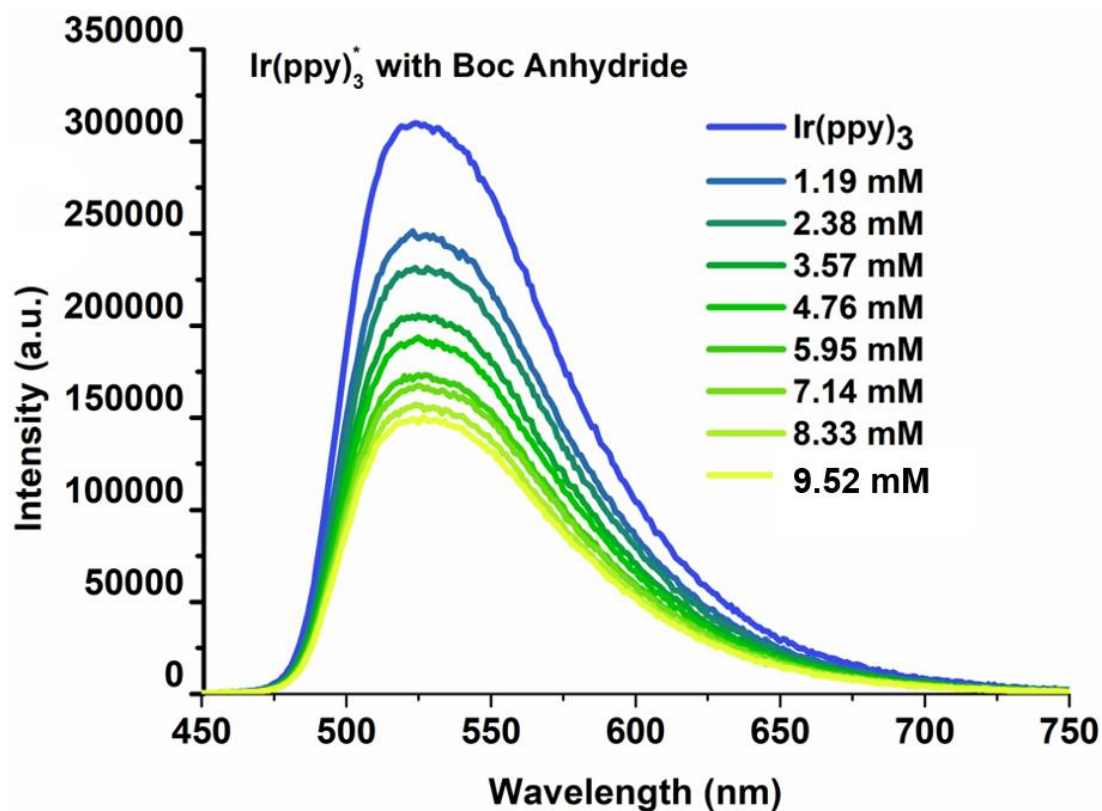

**Figure S13.** Emission quenching of *fac*-Ir(ppy)<sub>3</sub> with *Boc* anhydride in DMF (50 μM *fac*-Ir(ppy)<sub>3</sub>). In DMF) 20°C,  $d_{em} = 2$  nm,  $d_{ex} = 2$  nm,  $\lambda_{ex} = 430$  nm,  $\lambda_{em} = 450$ -750 nm).

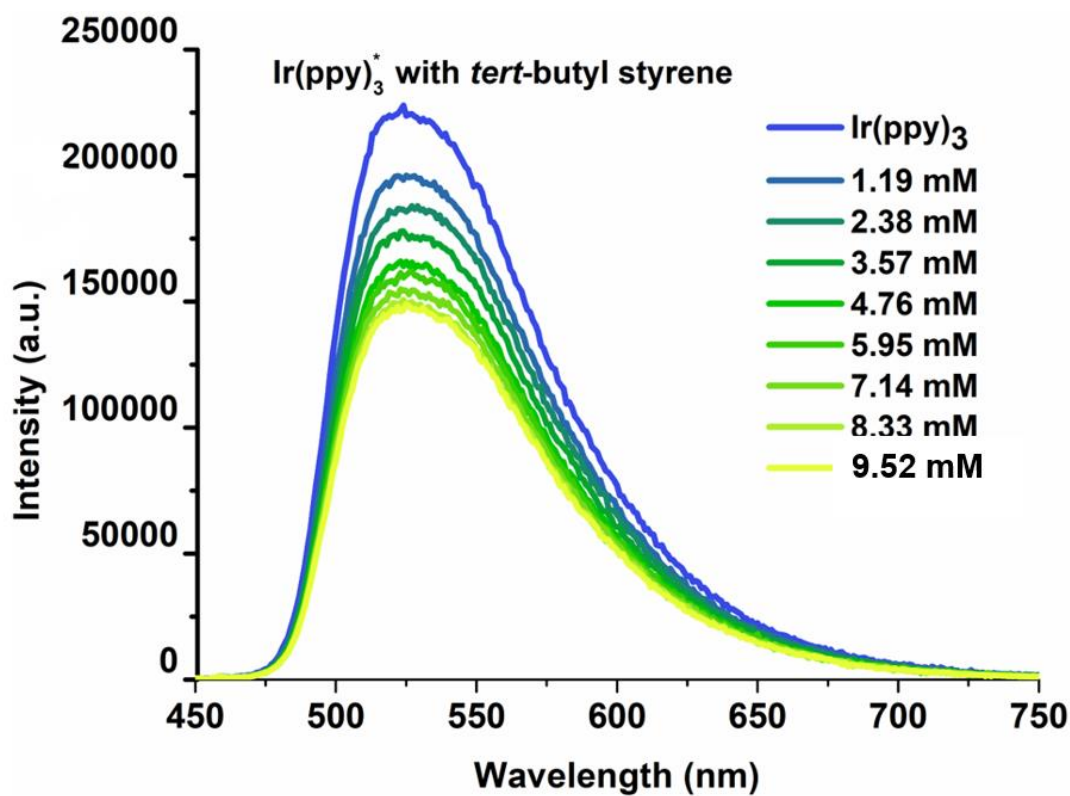

**Figure S14.** Emission quenching of *fac*-Ir(ppy)<sub>3</sub> with 4-*tert*-butylstyrene in DMF (50 μM *fac*-Ir(ppy)<sub>3</sub>). In DMF) 20°C,  $d_{em} = 2$  nm,  $d_{ex} = 2$  nm,  $\lambda_{ex} = 430$  nm,  $\lambda_{em} = 450$ -750 nm).

## 6. Radical trapping experiment

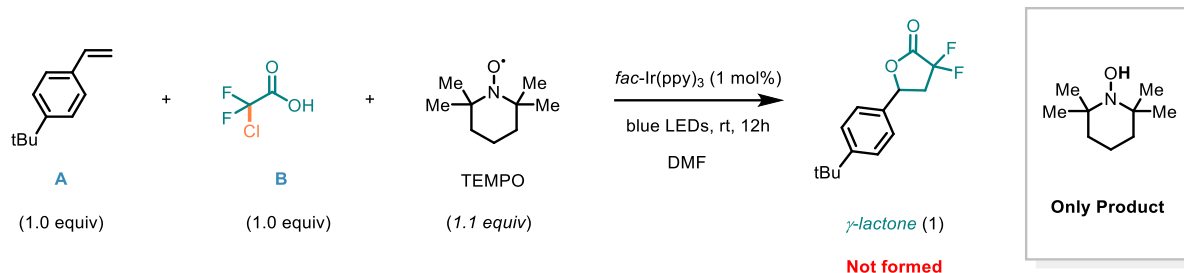

A flame dried 20 mL crimp cap vial was charged with *fac*-[Ir(ppy)<sub>3</sub>] (3.3 mg, 5.0  $\mu$ mol, 1.0 mol%) and equipped with a magnetic bar. The content of the vial was then subject to three vacuum/argon cycles. Anhydrous DMF (1 mL) was added under an argon atmosphere, and the solution was sparged for 5 min. 4-*tert*-butylstyrene (0.5 mmol, 1.0 equiv), 2,2,6,6-tetramethylpiperidin-1-yl)oxidanyl (TEMPO) (86 mg, 0.55 mmol, 1.1 equiv) and chlorodifluoroacetic acid (44  $\mu$ L, 0.5 mmol, 1.0 equiv) were introduced to the solution *via* microsyringes. The reaction mixture was stirred at room temperature under blue LEDs irradiation for 12 h. Crude product was analysed by GC-MS and NMR, confirming no product formation and starting material remains unreacted.

## 7. Competition experiment

In this reaction, the use of acids either substituted at  $\alpha$ -chloro or  $\alpha$ -bromo demonstrated nearly identical efficiency. This assertion was confirmed *via* a competition experiment utilizing bromochloroacetic acid which led to a product mixture comprising both  $\alpha$ -chloro lactone and  $\alpha$ -bromo lactone. There was a slight preference for the former, indicating that C-Br cleavage in the acid occurs faster than C-Cl cleavage

A flame dried 20 mL crimp cap vial was charged with *fac*-[Ir(ppy)<sub>3</sub>] (3.3 mg, 5.0  $\mu$ mol, 1.0 mol%) and equipped with a magnetic bar. The content of the vial was then subject to three vacuum/argon cycles. Anhydrous DMF (1 mL) was added under an argon atmosphere, and the solution was sparged for 5 min. 4-*tert*-butylstyrene (0.5 mmol, 1.0 equiv), and *bromochloroacetic acid* (100  $\mu$ L, 1.0 mmol, 2.0 equiv) were introduced to the solution *via* microsyringes. The reaction mixture was stirred at room temperature under blue LEDs irradiation for 12 h. Crude product was analysed by GC-MS and ratio of isomers were found to be 55:45.

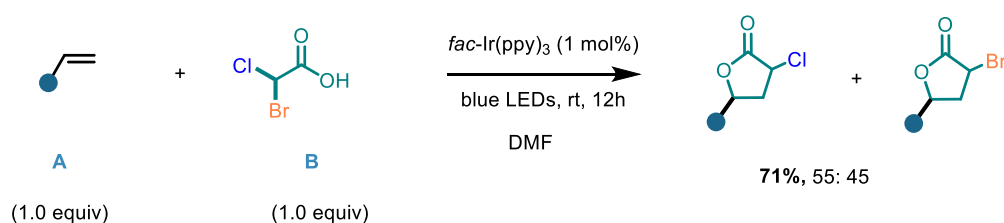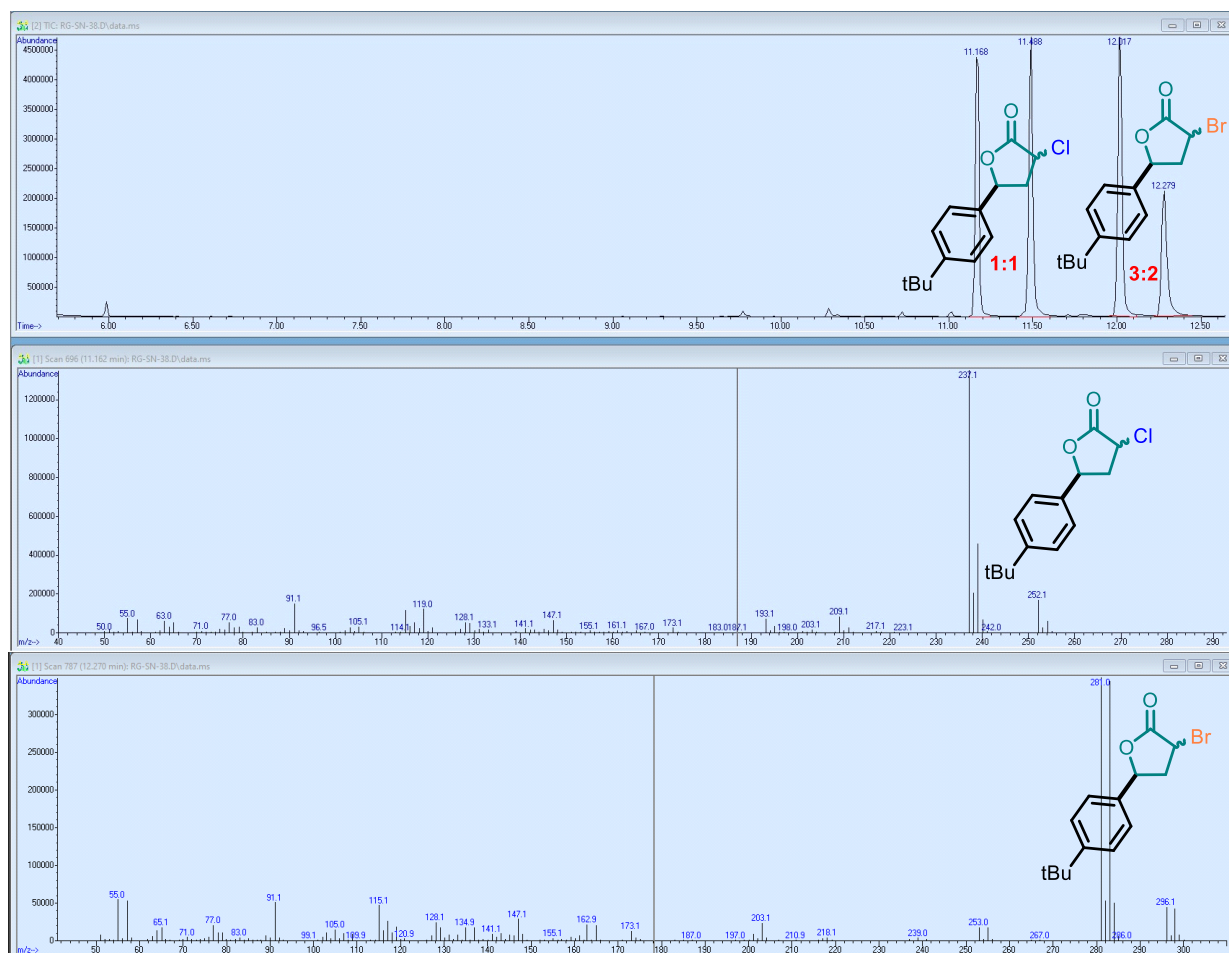

Figure S15. GC-MS for competition experiment.

## 8. Scale-up

### Flow set-up

**Procedure for reaction in flow:** In an oven dried flask, 4-*tert*-butylstyrene (obtained commercially from Thermoscientific - Alfa Aesar, 3.65 mL, 20.0 mmol, 1.0 equiv) and *fac*-[Ir(ppy)<sub>3</sub>] (131.0 mg, 0.2 mmol, 1.0 mol%) were dissolved in 20 mL of DMF. In another flask, chlorodifluoroacetic acid (40.0 mmol, 3.4 mL) was dissolved in 20 mL of DMF. Both solutions were drawn up into syringes and connected to a syringe pump. These syringes were then attached to a 12 mL flow coil tubing (PFA tubing, 1 mm inner diameter) *via* a PEEK Y-mixer. The stock solutions were pumped into the flow reactor at a flow rate of 0.1 mL/min from each syringe, corresponding to a residence time of 2 hours. When the syringe became empty, fresh stock solution was loaded into another syringe and injected into the reactor to take all the product at the end. Following this, the syringe filled with nitrogen was purged at the same flow rate to remove any remaining reaction mixture from the tubes. The reaction mixture was added to an appropriately sized separatory funnel and 200 mL EtOAc was added and washed with water (4×80) mL; further organic layer was washed with 60 mL brine. The combined organic layers were then dried over Na<sub>2</sub>SO<sub>4</sub>, filtered, and concentrated under reduced pressure. The residue was purified by flash column chromatography over silica gel as indicated to afford  $\gamma$ -lactone as white solid (3.8 g, 75% yield).

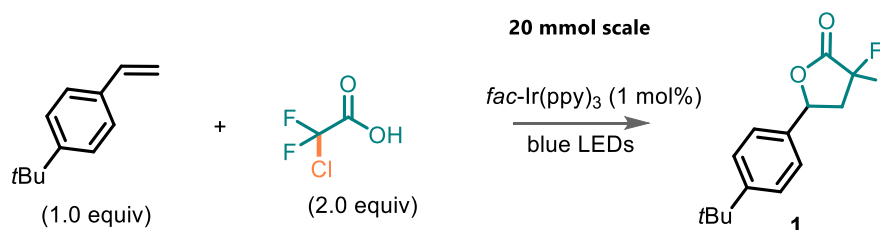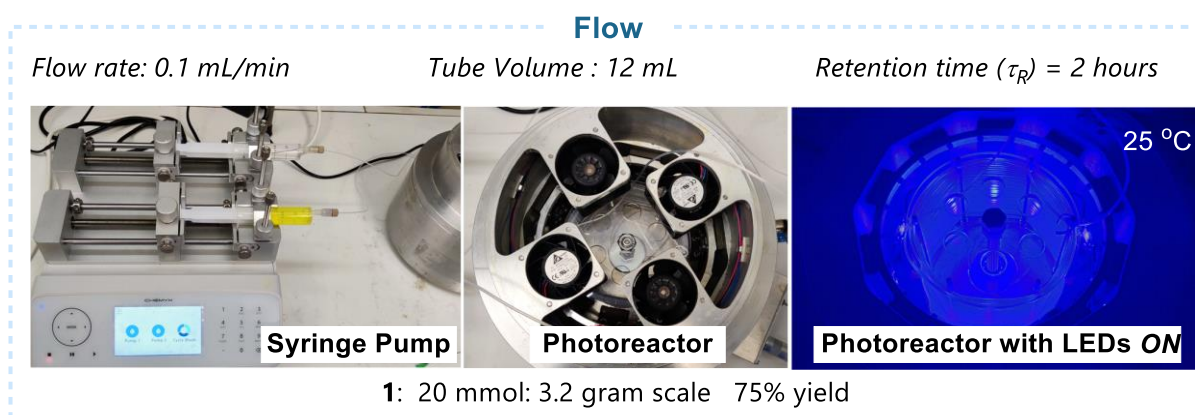

**Figure S16.** Flow setup for scale-up lactone in DMF.

#### Tube volume

$$V = \pi r^2 h \quad (r = 0.5 \text{ mm}; h = 15240 \text{ mm})$$
$$V = 3.14 \times (0.5)^2 \times (15240) \text{ mm}^3$$
$$V = 11969.46 \text{ mm}^3$$
$$V = 11.97 \text{ mL}$$

#### Retention time

$$\tau_R = \text{Tube volume} / \text{Flow rate}$$
$$\tau_R = 11.97 \text{ mL} / 0.1 \text{ mLmin}^{-1}$$
$$\tau_R = 119.7 \text{ min}$$
$$\tau_R = 2 \text{ h}$$



### Batch set-up

**Procedure for reaction in Batch:** A flame-dried 150 mL Schlenk tube was charged with *fac*-[Ir(ppy)<sub>3</sub>] (65.0 mg, 0.1 mmol, 1.0 mol%) and equipped with a magnetic stir bar. The contents of the tube were subjected to three vacuum/nitrogen cycles. Anhydrous DMF (30 mL) was added under an argon atmosphere, and the solution was purged for 5 minutes. 4-*tert*-butylstyrene (1.8 mL, 10.0 mmol, 1.0 equiv) and chlorodifluoroacetic acid (1.7 mL, 20.0 mmol, 2.0 equiv) were then added to the solution. The reaction mixture was stirred at room temperature under blue LED irradiation for 24 hours. The reaction contents were transferred to an appropriately sized separatory funnel, and 100 mL of EtOAc was added. The mixture was washed with water (3 × 50 mL), and the organic layer was further washed with 30 mL of brine. The combined organic layers were dried over Na<sub>2</sub>SO<sub>4</sub>, filtered, and concentrated under reduced pressure. The residue was purified by flash column chromatography over silica gel, yielding  $\gamma$ -lactone as a yellow solid (2.13 g, 84% yield).

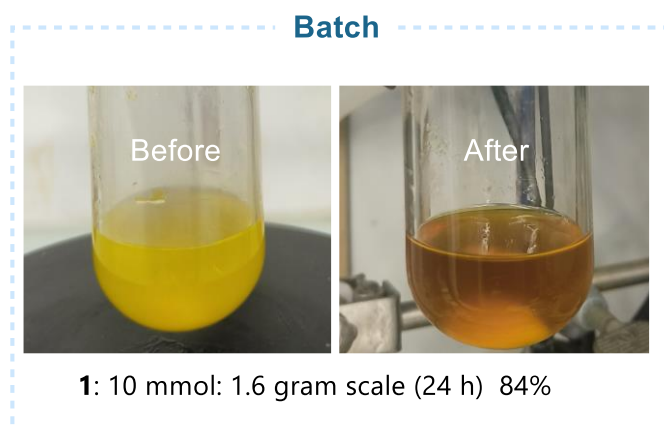

**Figure S17.** Batch setup for scale-up lactone in DMF.

## 9. Proposed mechanism for product 3

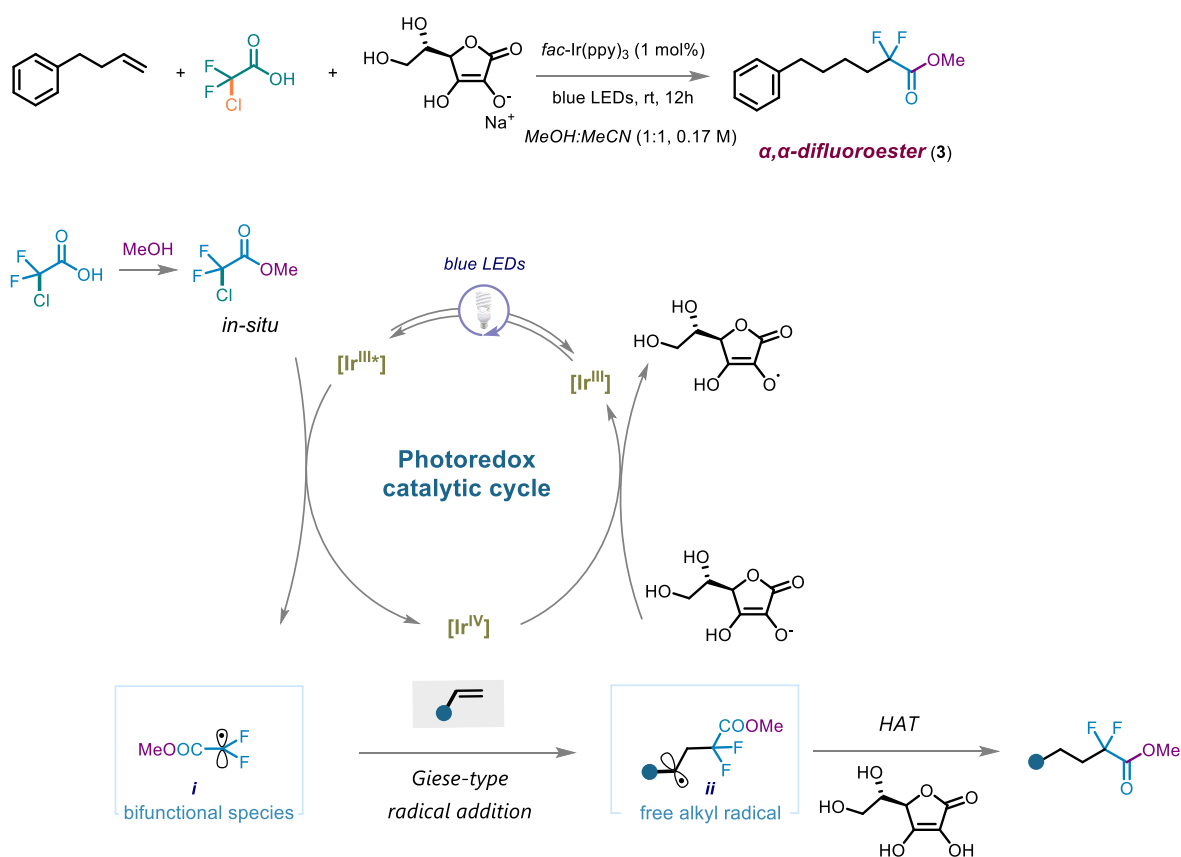

Figure S18. Proposed mechanism for hydro esterification reaction.

## 10. Computational parameters

The global electrophilicity index ( $\omega$  eV) values depicted in the manuscript are taken from the review by our group. The  $\text{CF}_2\text{COOH}$  radical was not computed in the review and its parameters were determined using the same level of theory as the other compounds. See supporting information (*Angew. Chem. Int. Ed.* **2024**, e202318377).<sup>12</sup> section 2.2 of the review for details.

| Radical                                | Parameters in gas phase<br>(U)B3LYP-D3(BJ)/6-311+G(d,p) |         |             |            |               |                 |
|----------------------------------------|---------------------------------------------------------|---------|-------------|------------|---------------|-----------------|
|                                        | IP (eV)                                                 | EA (eV) | $\eta$ (eV) | $\mu$ (eV) | $\omega$ (eV) | $\omega^-$ (eV) |
| $\cdot\text{CF}_2\text{H}$             | 10.34                                                   | -0.26   | 10.60       | -5.04      | 1.196         | 0.268           |
| $\cdot\text{CF}_2\text{CO}_2\text{Me}$ | 9.40                                                    | 0.97    | 8.43        | -5.18      | 1.594         | 0.242           |
| $\cdot\text{CF}_3$                     | 11.41                                                   | 0.61    | 10.80       | -6.01      | 1.673         | 0.183           |
| $\cdot\text{CF}_2\text{CO}_2\text{H}$  | 9.75                                                    | 1.12    | 8.63        | -5.43      | 1.709         | 0.222           |

Table S13 IP: Ionization Potential; EA: Electron Affinity;  $\eta$ : Chemical hardness;  $\mu$ : Chemical potential;  $\omega$ : Global Electrophilicity index  
 $\omega^-$ : Nucleophilicity index

## NMR Data

### 5-(4-(Chloromethyl)phenyl)dihydrofuran-2(3H)-one (4)

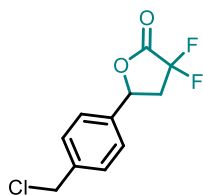

This compound was obtained according to general procedure **1** from 1-(chloromethyl)-4-vinylbenzene (77.0 mg, 0.5 mmol), *fac*-[Ir(ppy)<sub>3</sub>] (3.3 mg, 1.0 mol%), *CDF*A (88 μL, 1.0 mmol), and anhydrous DMF (1 mL). Isolated as a white solid (96.0 mg, 78% yield) after purification by flash column chromatography (12 g SiO<sub>2</sub>, hexane/EA = 25:1). Spectroscopic data match with those reported in the literature.<sup>13</sup>

<sup>1</sup>H-NMR (500 MHz, CDCl<sub>3</sub>): δ 7.50 – 7.42 (m, 2H), 7.37 – 7.31 (m, 2H), 5.62 (dd, *J* = 8.8, 6.3 Hz, 1H), 4.60 (s, 2H), 3.20 – 3.08 (m, 1H), 2.71 – 2.55 (m, 1H).

<sup>13</sup>C-NMR (126 MHz, CDCl<sub>3</sub>): δ 164.8 (dd, *J* = 33.9, 32.0 Hz), 139.2, 136.6, 129.5, 126.2, 115.6 (dd, *J* = 258.9, 250.2 Hz), 76.7 (dd, *J* = 7.1, 1.9 Hz), 45.5, 40.0 (dd, *J* = 22.3, 20.8 Hz)

<sup>19</sup>F-NMR (282 MHz, CDCl<sub>3</sub>): δ -106.5 (d, *J* = 279.2 Hz), -109.1 (d, *J* = 279.2 Hz).

### 3,3-Difluoro-5,5-bis(4-fluorophenyl)dihydrofuran-2(3H)-one (5)

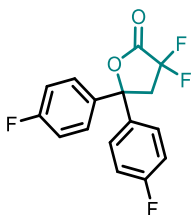

This compound was obtained according to general procedure **1** 4,4'-(ethene-1,1-diyl)bis(fluorobenzene) (108.1 mg, 0.5 mmol), *fac*-[Ir(ppy)<sub>3</sub>] (3.3 mg, 1.0 mol%), *CDF*A (88 μL, 1.0 mmol), and anhydrous DMF (1 mL). Isolated as a white crystalline solid (103.9 mg, 67% yield) after purification by flash column chromatography (12 g SiO<sub>2</sub>, hexane/EA = 20:1). Spectroscopic data match with those reported in the literature.<sup>13</sup>

<sup>1</sup>H-NMR (300 MHz, CDCl<sub>3</sub>): δ 7.38 – 7.24 (m, 4H), 7.15 – 7.01 (m, 4H), 3.39 (t, *J* = 13.7 Hz, 2H).

<sup>13</sup>C-NMR (75 MHz, CDCl<sub>3</sub>): δ 164.4 (t, *J* = 16.2 Hz), 161.1, 137.4 (d, *J* = 3.4 Hz), 127.4 (d, *J* = 8.6 Hz), 116.2 (d, *J* = 21.9 Hz), 115.5 (t, *J* = 254.9 Hz), 85.9 (t, *J* = 4.0 Hz), 44.8 (t, *J* = 20.8 Hz).

<sup>19</sup>F-NMR (282 MHz, CDCl<sub>3</sub>): δ -112.4, -104.6.

### 5,5-Bis(4-chlorophenyl)-3,3-difluorodihydrofuran-2(3H)-one (6)

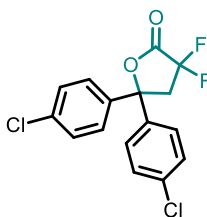

This compound was obtained according to general procedure **1** 4,4'-(ethene-1,1-diyl)bis(chlorobenzene) (124.6 mg, 0.5 mmol), *fac*-[Ir(ppy)<sub>3</sub>] (3.3 mg, 1.0 mol%), *CDF*A (88 μL, 1.0 mmol), and anhydrous DMF (1 mL). Isolated as a white crystalline solid (118.3 mg, 69% yield) after purification by flash column chromatography (12 g SiO<sub>2</sub>, hexane/EA = 20:1). Spectroscopic data match with those reported in the literature.<sup>13</sup>

<sup>1</sup>H-NMR (300 MHz, CDCl<sub>3</sub>): δ 7.39 – 7.33 (m, 4H), 7.30 – 7.24 (m, 4H), 3.37 (t, *J* = 13.6 Hz, 2H).

<sup>13</sup>C-NMR (75 MHz, CDCl<sub>3</sub>): δ 164.0 (t, *J* = 32.9 Hz), 139.8, 135.2, 129.4, 126.8, 115.3 (t, *J* = 254.9 Hz), 85.6 (t, *J* = 4.6 Hz), 44.5 (t, *J* = 21.0 Hz).

<sup>19</sup>F-NMR (282 MHz, CDCl<sub>3</sub>): δ -104.7.

#### 5-(4'-Bromo-[1,1'-biphenyl]-4-yl)-3,3-difluoro-5-methyldihydrofuran-2(3H)-one (**7**)

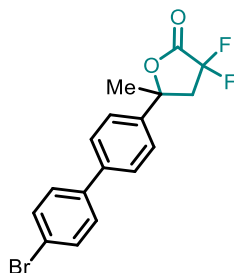

This compound was obtained according to general procedure **1** 4-bromo-4'-(prop-1-en-2-yl)-1,1'-biphenyl (136.1 mg, 0.5 mmol), *fac*-[Ir(ppy)<sub>3</sub>] (3.3 mg, 1.0 mol%), *CDF*A (88 μL, 1.0 mmol), and anhydrous DMF (1 mL). Isolated as a white crystalline solid (153.7 mg, 84% yield) after purification by flash column chromatography (12 g SiO<sub>2</sub>, hexane/EA = 20:1). Spectroscopic data match with those reported in the literature.<sup>13</sup>

<sup>1</sup>H-NMR (300 MHz, CDCl<sub>3</sub>): δ 7.64 – 7.54 (m, 4H), 7.52 – 7.36 (m, 4H), 3.07 – 2.91 (m, 2H), 1.86 (s, 3H).

<sup>13</sup>C-NMR (126 MHz, CDCl<sub>3</sub>): δ 164.7 (t, *J* = 33.0 Hz), 142.0, 140.3, 139.1, 132.2, 128.8, 127.6, 124.6, 122.2, 116.0 (dd, *J* = 255.7, 253.0 Hz), 83.9 (dd, *J* = 5.1, 3.5 Hz), 45.1 (t, *J* = 20.6 Hz), 30.3.

<sup>19</sup>F-NMR (282 MHz, CDCl<sub>3</sub>): δ -101.8 (d, *J* = 282.6 Hz), -104.8 (d, *J* = 280.9 Hz).

#### 2-(4-(4,4-Difluoro-5-oxotetrahydrofuran-2-yl)benzyl)isoindoline-1,3-dione (**8**)

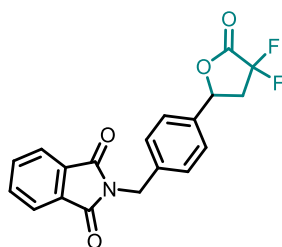

This compound was obtained according to general procedure **1** from 2-(4-vinylbenzyl)isoindoline-1,3-dione (132.0 mg, 0.5 mmol), *fac*-[Ir(ppy)<sub>3</sub>] (3.3 mg, 1.0 mol%), *CDF*A (88 μL, 1.0 mmol), and anhydrous DMF (1 mL). Isolated as a white crystalline solid (114.2 mg, 64% yield) after purification by flash column chromatography (12 g SiO<sub>2</sub>, hexane/EA = 20:1). Spectroscopic data match with those reported in the literature.<sup>13</sup>

**<sup>1</sup>H-NMR** (500 MHz, CDCl<sub>3</sub>): δ 7.85 (dd, *J* = 5.5, 3.0 Hz, 2H), 7.72 (dd, *J* = 5.5, 3.0 Hz, 2H), 7.50 (d, *J* = 8.2 Hz, 2H), 7.29 (d, *J* = 8.2 Hz, 2H), 5.58 (dd, *J* = 8.8, 6.2 Hz, 1H), 4.86 (s, 2H), 3.15 – 3.03 (m, 1H), 2.67 – 2.51 (m, 1H).

**<sup>13</sup>C-NMR** (126 MHz, CDCl<sub>3</sub>): δ 168.1, 164.9 (dd, *J* = 33.8, 31.9 Hz), 138.1, 136.0, 134.3, 132.1, 129.5, 126.2, 123.6, 115.7 (dd, *J* = 259.1, 250.0 Hz), 76.8 (dd, *J* = 7.2, 1.9 Hz), 41.3, 40.0 (dd, *J* = 22.2, 20.7 Hz).

**<sup>19</sup>F-NMR** (282 MHz, CDCl<sub>3</sub>): δ -107.0 (d, *J* = 279.2 Hz), -109.2 (d, *J* = 279.2 Hz).

### 3-(4,4-Difluoro-5-oxo-2-phenyltetrahydrofuran-3-carbonyl)oxazolidin-2-one (9)

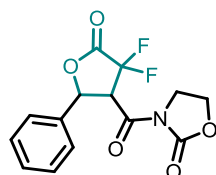

This compound was obtained according to general procedure **1** from 3-(3-phenylacryloyl)oxazolidin-2-one (108.6 mg, 0.5 mmol), *fac*-[Ir(ppy)<sub>3</sub>] (3.3 mg, 1.0 mol%), *CDF*A (88 μL, 1.0 mmol), and anhydrous DMF (1 mL). Isolated as a white crystalline solid (80.0 mg, 52% yield) after purification by flash column chromatography (12 g SiO<sub>2</sub>, hexane/EA = 20:1). Crude NMR indicated the d.r. ratio 6:1. Spectroscopic data match with those reported in the literature.<sup>13</sup>

**<sup>1</sup>H-NMR** (300 MHz, CDCl<sub>3</sub>): δ 7.57 – 7.30 (m, 5H), 6.07 (d, *J* = 7.8 Hz, 1H), 5.47 – 5.27 (m, 1H), 4.57 – 4.36 (m, 2H), 4.20 – 3.96 (m, 2H).

**<sup>13</sup>C-NMR** (101 MHz, CDCl<sub>3</sub>): δ 163.1 (dd, *J* = 2.7, 1.6 Hz), 162.9 (dd, *J* = 32.7, 31.2 Hz), 152.9, 134.8, 130.2, 129.4, 126.5, 114.2 (dd, *J* = 266.8, 257.3 Hz), 78.8 (dd, *J* = 1.3, 1.2 Hz), 62.5, 53.0 (dd, *J* = 20.2, 18.3 Hz), 42.9.

**<sup>19</sup>F-NMR** (282 MHz, CDCl<sub>3</sub>): δ -107.4 (d, *J* = 274.0 Hz), -111.6 (d, *J* = 274.0 Hz).

### 3,3-Difluoro-3,3a,4,8b-tetrahydro-2H-indeno[1,2-*b*]furan-2-one (10)

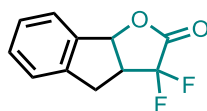

This compound was obtained according to general procedure **1** from indene (59.0 μL, 0.5 mmol), *fac*-[Ir(ppy)<sub>3</sub>] (3.3 mg, 1.0 mol%), *CDF*A (88 μL, 1.0 mmol), and anhydrous DMF (1 mL). Isolated as a white crystalline solid (70.0 mg, 67% yield) after purification by flash column chromatography (12 g SiO<sub>2</sub>, hexane/EA = 20:1). Crude NMR indicated the d.r. ratio 5:1. Spectroscopic data match with those reported in the literature.<sup>14</sup>

**<sup>1</sup>H-NMR** (300 MHz, CDCl<sub>3</sub>): δ 7.58 – 7.49 (m, 1H), 7.47 – 7.39 (m, 1H), 7.38 – 7.29 (m, 2H), 5.99 (d, *J* = 6.7 Hz, 1H), 3.57 (ddtd, *J* = 19.8, 8.2, 7.0, 3.3 Hz, 1H), 3.30 (d, *J* = 7.6 Hz, 2H).

**<sup>13</sup>C-NMR** (75 MHz, CDCl<sub>3</sub>): δ 165.0 (dd, *J* = 31.4, 29.8 Hz), 142.8 (d, *J* = 1.2 Hz), 136.7 (d, *J* = 1.1 Hz), 131.3, 128.2, 126.5, 125.3, 116.4 (dd, *J* = 249.7, 249.6 Hz), 84.8 (dd, *J* = 3.5, 3.4 Hz), 44.7 (dd, *J* = 19.9, 19.7 Hz), 30.2 (dd, *J* = 5.1, 4.8 Hz).

**<sup>19</sup>F-NMR** (282 MHz, CDCl<sub>3</sub>): δ -101.1 (d, *J* = 282.6 Hz), -114.6 (d, *J* = 280.9 Hz).

**HRMS** (EI) *m/z*, [M]<sup>+</sup> calcd for C<sub>11</sub>H<sub>8</sub>F<sub>2</sub>O<sub>2</sub><sup>+</sup>: 210.0492; found: 210.0489.

**4',4'-Difluoro-3',4'-dihydro-5'H-spiro[dibenzo[*a,d*][7]annulene-5,2'-furan]-5'-one (11)**

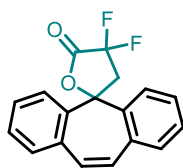

This compound was obtained according to general procedure **1** 5-methylene-5*H*-dibenzo[*a,d*][7]annulene (104.0 mg, 0.5 mmol), *fac*-[Ir(ppy)<sub>3</sub>] (3.3 mg, 1.0 mol%), *CDF*A (88 μL, 1.0 mmol), and anhydrous DMF (1 mL). Isolated as a white crystalline solid (124.0 mg, 62% yield) after purification by flash column chromatography (12 g SiO<sub>2</sub>, hexane/EA = 20:1). Spectroscopic data match with those reported in the literature.<sup>13</sup>

<sup>1</sup>H-NMR (300 MHz, CDCl<sub>3</sub>): δ 7.77 – 7.67 (m, 2H), 7.51 – 7.29 (m, 6H), 7.12 (s, 2H), 2.97 (t, *J* = 14.8 Hz, 2H).

<sup>13</sup>C-NMR (75 MHz, CDCl<sub>3</sub>): δ 164.6 (t, *J* = 33.9 Hz), 138.6, 131.8, 131.4, 129.7, 129.4, 128.0, 122.3, 115.3 (t, *J* = 253.6 Hz), 84.2 (t, *J* = 4.7 Hz), 42.6 (t, *J* = 20.7 Hz).

<sup>19</sup>F-NMR (282 MHz, CDCl<sub>3</sub>): δ -104.3.

**3,3-Difluoro-5-(4-(((8*R*,9*S*,13*S*,14*S*)-13-methyl-17-oxo-7,8,9,11,12,13,14,15,16,17-decahydro-6*H*-cyclopenta[*a*]phenanthren-3-yl)oxy)methyl)phenyl)dihydrofuran-2(3*H*)-one (12)**

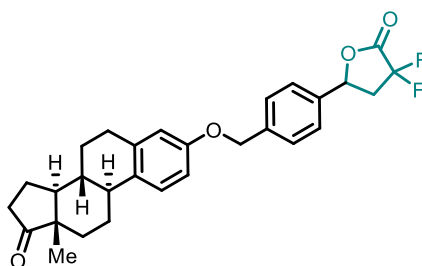

This compound was obtained according to general procedure **1** from (8*R*,9*S*,13*S*,14*S*)-13-methyl-3-((4-vinylbenzyl)oxy)-6,7,8,9,11,12,13,14,15,16-decahydro-17*H*-cyclopenta[*a*]phenanthren-17-one (193.1 mg, 0.5 mmol), *fac*-[Ir(ppy)<sub>3</sub>] (3.3 mg, 1.0 mol%), *CDF*A (88 μL, 1.0 mmol), and anhydrous DMF (1 mL). Isolated as a white crystalline solid (117.7 mg, 49% yield) after purification by flash column chromatography (12 g SiO<sub>2</sub>, hexane/EA = 5:1). Spectroscopic data match with those reported in the literature.<sup>13</sup>

<sup>1</sup>H-NMR (300 MHz, CDCl<sub>3</sub>): δ 7.55 – 7.47 (m, 2H), 7.40 – 7.31 (m, 2H), 7.21 (d, *J* = 8.7 Hz, 1H), 6.82 – 6.68 (m, 2H), 5.63 (dd, *J* = 8.8, 6.1 Hz, 1H), 5.06 (s, 2H), 3.24 – 3.04 (m, 1H), 2.90 (q, *J* = 5.1 Hz, 2H), 2.78 – 2.30 (m, 4H), 2.24 – 1.88 (m, 4H), 1.70 – 1.38 (m, 6H), 0.91 (s, 3H).

<sup>13</sup>C-NMR (101 MHz, CDCl<sub>3</sub>): δ 221.0, 164.9 (dd, *J* = 33.7, 32.0 Hz), 156.7, 139.2, 138.1, 135.9, 132.8, 128.2, 126.6, 126.1, 115.7 (dd, *J* = 258.9, 250.2 Hz), 115.0, 112.5, 76.93 (dd, *J* = 7.3, 5.4 Hz), 69.4, 50.6, 48.1, 44.1, 40.1 (dd, *J* = 22.2, 20.8 Hz), 38.5, 36.0, 31.7, 29.8, 26.7, 26.0, 21.7, 14.0.

<sup>19</sup>F-NMR (282 MHz, CDCl<sub>3</sub>): δ -106.5 (d, *J* = 279.2 Hz), -109.1 (d, *J* = 279.2 Hz).

**(S)-2,5,7,8-Tetramethyl-2-((4S,8S)-4,8,12-trimethyltridecyl)chroman-6-yl 4-(4,4-difluoro-5-oxotetrahydrofuran-2-yl)benzoate (13)**

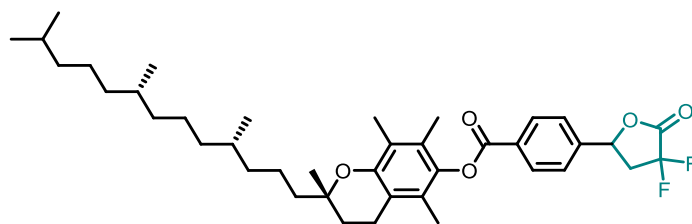

This compound was obtained according to general procedure **1** (*S*)-2,5,7,8-tetramethyl-2-((4*S*,8*S*)-4,8,12-trimethyltridecyl)chroman-6-yl 4-vinylbenzoate (280.4 mg, 0.5 mmol), *fac*-[Ir(ppy)<sub>3</sub>] (3.3 mg, 1.0 mol%), *CDFA* (88 μL, 1.0 mmol), and anhydrous DMF (1 mL). Isolated as a white crystalline solid (111.3 mg, 54% yield) after purification by flash column chromatography (12 g SiO<sub>2</sub>, hexane/EA = 5:1). Spectroscopic data match with those reported in the literature.<sup>13</sup>

**<sup>1</sup>H-NMR** (400 MHz, CDCl<sub>3</sub>): δ 8.36 – 8.28 (m, 2H), 7.55 – 7.47 (m, 2H), 5.72 (dd, *J* = 8.8, 6.3 Hz, 1H), 3.30 – 3.15 (m, 1H), 2.75 – 2.57 (m, 3H), 2.12 (s, 3H), 2.05 (s, 3H), 2.01 (s, 3H), 1.89 – 1.77 (m, 3H), 1.61 – 1.45 (m, 5H), 1.34 – 1.18 (m, 12H), 1.17 – 1.04 (m, 6H), 0.90 – 0.82 (m, 12H).

**<sup>13</sup>C-NMR** (101 MHz, CDCl<sub>3</sub>): δ 164.6 (dd, *J* = 32.3, 32.2 Hz), 164.5, 149.8, 141.7, 140.6, 131.2, 131.0, 126.9, 125.7, 125.1, 123.4, 117.7, 115.4 (dd, *J* = 258.4, 250.8 Hz), 77.4, 76.3 (dd, *J* = 1.8, 2.2 Hz), 75.3, 40.1 (dd, *J* = 21.1, 21.3 Hz), 39.5, 37.7, 37.7, 37.6, 37.6, 37.5, 37.4, 32.9, 32.9, 28.1, 25.0, 25.0, 24.6, 22.9, 22.8, 21.2, 20.8, 19.9, 19.8, 19.8, 19.8, 19.8, 13.2, 12.3, 12.0.

**<sup>19</sup>F-NMR** (376 MHz, CDCl<sub>3</sub>): δ -106.1 (dd, *J* = 23.2, 15.7 Hz), -106.9 (dd, *J* = 23.5, 16.0 Hz), -108.5 (dd, *J* = 12.6, 4.6 Hz), -109.3 (dd, *J* = 12.6, 4.0 Hz).

**1-Acetyl-3,3-difluoro-5-mesitylpyrrolidin-2-one (14)**

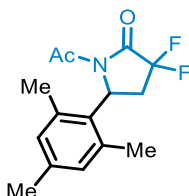

This compound was obtained according to general procedure **2** 1,3,5-trimethyl-2-vinylbenzene (73.1 mg, 0.5 mmol), *fac*-[Ir(ppy)<sub>3</sub>] (3.3 mg, 1.0 mol%), *CDFA* (88 μL, 1.0 mmol), Boc anhydride (218.3 mg, 1.0 mmol) and anhydrous MeCN (3 mL). Isolated as a white crystalline solid (60.5 mg, 43% yield) after purification by flash column chromatography (12 g SiO<sub>2</sub>, hexane/EA = 20:1). Spectroscopic data match with those reported in the literature.<sup>13</sup>

**<sup>1</sup>H-NMR** (300 MHz, CDCl<sub>3</sub>): δ 6.84 (d, *J* = 25.4 Hz, 2H), 5.59 (td, *J* = 8.2, 2.7 Hz, 1H), 2.97 (dddd, *J* = 21.7, 15.7, 8.9, 2.9 Hz, 1H), 2.54 (s, 3H), 2.53 – 2.45 (m, 1H), 2.44 (s, 3H), 2.24 (s, 3H), 2.13 (s, 3H).

**<sup>13</sup>C-NMR** (75 MHz, CDCl<sub>3</sub>): δ 170.0, 164.4 (dd, *J* = 31.4, 31.0 Hz), 137.8, 136.5, 133.5, 132.1, 131.4 (d, *J* = 1.4 Hz), 130.1, 116.9 (dd, *J* = 256.5, 248.2 Hz), 51.5 (dd, *J* = 1.4, 1.4 Hz), 34.4 (dd, *J* = 22.7, 20.5 Hz), 25.3, 20.9, 20.8, 20.6.

**<sup>19</sup>F-NMR** (282 MHz, CDCl<sub>3</sub>): δ -99.7 (d, *J* = 275.7 Hz), -106.1 (d, *J* = 275.7 Hz).

### Methyl 2-(1-acetyl-4,4-difluoro-5-oxopyrrolidin-2-yl)benzoate (15)

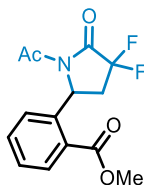

This compound was obtained according to general procedure **2** methyl 2-vinylbenzoate (81.0 mg, 0.5 mmol), *fac*-[Ir(ppy)<sub>3</sub>] (3.3 mg, 1.0 mol%), *CDF*A (88 μL, 1.0 mmol), Boc anhydride (218.3 mg, 1.0 mmol) and anhydrous MeCN (3 mL). Isolated as a white crystalline solid (72.8 mg, 49% yield) after purification by flash column chromatography (12 g SiO<sub>2</sub>, hexane/EA = 20:1). Spectroscopic data match with those reported in the literature.<sup>13</sup>

<sup>1</sup>H-NMR (300 MHz, CDCl<sub>3</sub>): δ 8.07 (dd, *J* = 7.8, 1.5 Hz, 1H), 7.51 (td, *J* = 7.7, 1.6 Hz, 1H), 7.38 (td, *J* = 7.6, 1.3 Hz, 1H), 7.08 (d, *J* = 7.9 Hz, 1H), 6.22 (d, *J* = 9.3 Hz, 1H), 3.92 (s, 3H), 3.09 (ddd, *J* = 39.2, 15.4, 9.4 Hz, 1H), 2.64 (s, 3H), 2.60 – 2.43 (m, 1H).

<sup>13</sup>C-NMR (75 MHz, CDCl<sub>3</sub>): δ 170.0, 167.0, 164.9 (dd, *J* = 32.7, 30.5 Hz), 141.8, 133.2, 131.9, 128.1, 127.5, 124.0, 117.3 (dd, *J* = 250.9, 250.4 Hz), 52.7 (d, *J* = 6.9 Hz), 52.5, 37.7 (t, *J* = 21.1 Hz), 25.6.

<sup>19</sup>F-NMR (282 MHz, CDCl<sub>3</sub>): δ -99.1 (d, *J* = 279.2 Hz), -105.1 (d, *J* = 275.7 Hz).

### 1-Acetyl-5-(4-chlorophenyl)-3,3-difluoropyrrolidin-2-one (16)

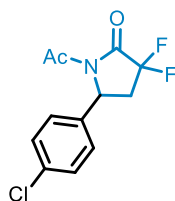

This compound was obtained according to general procedure **2** methyl 4-chlorostyrene (68.0 mg, 0.5 mmol), *fac*-[Ir(ppy)<sub>3</sub>] (3.3 mg, 1.0 mol%), *CDF*A (88 μL, 1.0 mmol), Boc anhydride (218.3 mg, 1.0 mmol) and anhydrous MeCN (3 mL). Isolated as a white crystalline solid (73.7 mg, 54% yield) after purification by flash column chromatography (12 g SiO<sub>2</sub>, hexane/EA = 20:1). Spectroscopic data match with those reported in the literature.<sup>13</sup>

<sup>1</sup>H-NMR (400 MHz, CDCl<sub>3</sub>): δ 7.36 – 7.30 (m, 2H), 7.19 – 7.11 (m, 2H), 5.35 (dt, *J* = 9.3, 3.0 Hz, 1H), 3.01 – 2.84 (m, 1H), 2.59 (s, 3H), 2.56 – 2.44 (m, 1H).

<sup>13</sup>C-NMR (101 MHz, CDCl<sub>3</sub>): δ 170.1, 166.9 – 161.3 (m), 138.0, 134.5, 129.5, 127.1 (d, *J* = 1.7 Hz), 117.1 (dd, *J* = 254.1, 251.3 Hz), 54.2 (dd, *J* = 5.2, 1.8 Hz), 37.3 (t, *J* = 21.4 Hz), 25.6.

<sup>19</sup>F-NMR (471 MHz, CDCl<sub>3</sub>): δ -99.5 (d, *J* = 276.5 Hz), -104.0 (d, *J* = 276.5 Hz).

### 1-Acetyl-5-(4-bromophenyl)-3,3-difluoropyrrolidin-2-one (17)

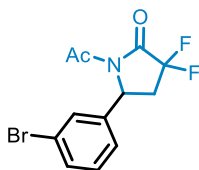

This compound was obtained according to general procedure **2** methyl 3-bromoostyrene (91.5 mg, 0.5 mmol), *fac*-[Ir(ppy)<sub>3</sub>] (3.3 mg, 1.0 mol%), *CDF*A (88 μL, 1.0 mmol), Boc anhydride (218.3 mg, 1.0 mmol) and anhydrous MeCN (3 mL). Isolated as a white crystalline solid (73.7 mg, 48% yield) after



purification by flash column chromatography (12 g SiO<sub>2</sub>, hexane/EA = 20:1). Spectroscopic data match with those reported in the literature.<sup>13</sup>

**<sup>1</sup>H-NMR** (500 MHz, CDCl<sub>3</sub>): δ 7.45 (ddd, *J* = 8.0, 1.9, 0.9 Hz, 1H), 7.35 (t, *J* = 1.9 Hz, 1H), 7.27 – 7.21 (m, 1H), 7.13 (dt, *J* = 8.0, 1.9 Hz, 1H), 5.33 (dt, *J* = 9.4, 3.0 Hz, 1H). 3.01 – 2.85 (m, 1H), 2.61 (s, 3H), 2.58 – 2.44 (m, 1H).

**<sup>13</sup>C-NMR** (126 MHz, CDCl<sub>3</sub>): δ 170.0, 164.0 (t, *J* = 32.3 Hz), 141.8, 131.8, 130.8, 128.9 (d, *J* = 1.6 Hz), 124.2 (d, *J* = 1.7 Hz), 123.3, 117.0 (dd, *J* = 254.1, 251.6 Hz), 54.2 (dd, *J* = 5.1, 1.5 Hz), 37.3 (t, *J* = 21.6 Hz), 25.6.

**<sup>19</sup>F-NMR** (471 MHz, CDCl<sub>3</sub>): δ -99.6 (d, *J* = 276.5 Hz), -104.0 (d, *J* = 276.5 Hz).

#### 1-Acetyl-3,3-difluoro-5-(4-iodophenyl)-5-methylpyrrolidin-2-one (18)

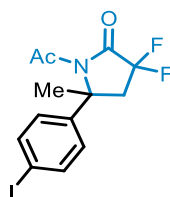

This compound was obtained according to general procedure 2 1-iodo-4-(prop-1-en-2-yl)benzene (122.0 mg, 0.5 mmol), *fac*-[Ir(ppy)<sub>3</sub>] (3.3 mg, 1.0 mol%), *CDF*A (88 μL, 1.0 mmol), Boc anhydride (218.3 mg, 1.0 mmol) and anhydrous MeCN (3 mL). Isolated as a white crystalline solid (72.0 mg, 38% yield) after purification by flash column chromatography (12 g SiO<sub>2</sub>, hexane/EA = 20:1). Spectroscopic data match with those reported in the literature.<sup>13</sup>

**<sup>1</sup>H-NMR** (300 MHz, CDCl<sub>3</sub>): δ 7.76 – 7.63 (m, 2H), 7.04 – 6.93 (m, 2H), 2.72 – 2.58 (m, 2H), 2.56 (s, 3H), 1.98 (s, 3H).

**<sup>13</sup>C-NMR** (75 MHz, CDCl<sub>3</sub>): δ 170.3, 164.7 (dd, *J* = 31.8, 31.7 Hz), 143.2 (d, *J* = 1.7 Hz), 138.2, 126.4, 116.2 (dd, *J* = 253.1, 250.3 Hz), 93.4, 62.3 (dd, *J* = 4.4, 2.2 Hz), 47.1 (t, *J* = 20.0 Hz), 26.9, 25.2.

**<sup>19</sup>F-NMR** (282 MHz, CDCl<sub>3</sub>): δ -101.4 (d, *J* = 277.4 Hz), -103.8 (d, *J* = 275.7 Hz).

#### 1-(Acetyl-*d*<sub>3</sub>)-5-(4-*tert*-butyl)phenyl)-3,3-difluoropyrrolidin-2-one (19)

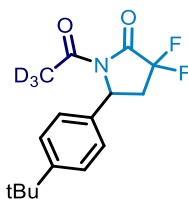

This compound was obtained according to general procedure 2 4-*tert*-butylstyrene (90.0 μL, 0.5 mmol, 0.5 mmol), *fac*-[Ir(ppy)<sub>3</sub>] (3.3 mg, 1.0 mol%), *CDF*A (88 μL, 1.0 mmol), Boc anhydride (218.3 mg, 1.0 mmol) and anhydrous CD<sub>3</sub>CN (3 mL). Isolated as a white crystalline solid (79.1 mg, 53% yield) after purification by flash column chromatography (12 g SiO<sub>2</sub>, hexane/EA = 20:1). Spectroscopic data match with those reported in the literature.<sup>13</sup>

**<sup>1</sup>H-NMR** (300 MHz, CDCl<sub>3</sub>): δ 7.36 (d, *J* = 8.5 Hz, 2H), 7.12 (d, *J* = 8.3 Hz, 2H), 5.37 (dt, *J* = 9.4, 3.0 Hz, 1H), 2.90 (dddd, *J* = 19.6, 16.6, 15.0, 9.3 Hz, 1H), 2.54 (dddd, *J* = 17.9, 15.2, 7.1, 3.0 Hz, 2H), 1.30 (s, 9H).

**<sup>13</sup>C-NMR** (101 MHz, CDCl<sub>3</sub>): 170.1, 164.2 (t, *J* = 32.2 Hz), 151.3, 136.3, 126.0, 125.3 – 125.1 (m), 117.3 (dt, *J* = 14229.9, 252.1 Hz), 54.36 (dd, *J* = 4.9, 1.6 Hz), 37.34 (d, *J* = 21.2 Hz), 34.6, 31.3, 24.89 (dt, *J* = 40.1, 19.9 Hz).

**<sup>19</sup>F-NMR** (282 MHz, CDCl<sub>3</sub>): δ -99.6 (d, *J* = 275.7 Hz), -103.6 (d, *J* = 275.7 Hz).

### 1-Acetyl-5,5-bis(4-chlorophenyl)-3,3-difluoropyrrolidin-2-one (20)

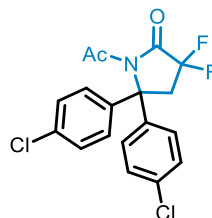

This compound was obtained according to general procedure **2** 4,4'-(ethene-1,1-diyl)bis(chlorobenzene) (124.5 μL, 0.5 mmol, 0.5 mmol), *fac*-[Ir(ppy)<sub>3</sub>] (3.3 mg, 1.0 mol%), *CDFA* (88 μL, 1.0 mmol), Boc anhydride (218.3 mg, 1.0 mmol) and CH<sub>3</sub>CN (3 mL). Isolated as a white solid (63.4 mg, 33% yield) after purification by flash column chromatography (12 g SiO<sub>2</sub>, hexane/EA = 20:1). Spectroscopic data match with those reported in the literature.<sup>13</sup>

**<sup>1</sup>H-NMR** (400 MHz, CDCl<sub>3</sub>): δ 7.40 – 7.30 (m, 4H), 7.21 – 7.12 (m, 4H), 3.19 (t, *J* = 14.1 Hz, 2H), 2.58 (s, 3H).

**<sup>13</sup>C-NMR** (101 MHz, CDCl<sub>3</sub>): δ 170.3, 164.7, 138.6, 134.5, 129.2, 128.8, 115.8 (t, *J* = 252.0 Hz), 68.6, 49.3 (t, *J* = 20.3 Hz).

**<sup>19</sup>F-NMR** (376 MHz, CDCl<sub>3</sub>): δ -103.6 (t, *J* = 14.0 Hz).

### 1-Acetyl-3,3-difluoro-3,3a,4,8b-tetrahydroindeno[1,2-b]pyrrol-2(1H)-one (21)

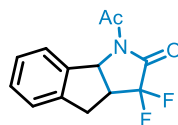

This compound was obtained according to general procedure **2**, 1*H*-indene (58 μL, 0.5 mmol, 0.5 mmol), *fac*-[Ir(ppy)<sub>3</sub>] (3.3 mg, 1.0 mol%), *CDFA* (88 μL, 1.0 mmol), Boc anhydride (218.3 mg, 1.0 mmol) and CH<sub>3</sub>CN (3 mL). Isolated as a white solid (55.2 mg, 44% yield) after purification by flash column chromatography (12 g SiO<sub>2</sub>, hexane/EA = 20:1).

**<sup>1</sup>H-NMR** (400 MHz, CDCl<sub>3</sub>): δ 7.57 (d, *J* = 7.7 Hz, 1H), 7.35 – 7.26 (m, 2H), 7.26 – 7.19 (m, 1H), 5.86 (dd, *J* = 8.0, 2.5 Hz, 1H), 3.44 – 3.17 (m, 3H), 2.61 (s, 3H).

**<sup>13</sup>C-NMR** (101 MHz, CDCl<sub>3</sub>): δ 164.1 (t, *J* = 32.9 Hz), 142.1, 139.0, 129.8, 127.8, 127.5, 124.9, 117.4 (dd, *J* = 258.0, 252.9 Hz), 61.8 (d, *J* = 4.9 Hz), 42.4 (dd, *J* = 23.0, 18.9 Hz), 29.7 (dd, *J* = 8.7, 2.1 Hz), 25.7.

**<sup>19</sup>F-NMR** (376 MHz, CDCl<sub>3</sub>): δ -102.4 (dd, *J* = 276.1, 17.8 Hz), -111.7 (dd, *J* = 276.1, 17.8 Hz).

**HRMS** (ESI) *m/z*, [M+Na]<sup>+</sup> calcd for C<sub>13</sub>H<sub>11</sub>F<sub>2</sub>O<sub>2</sub>+Na<sup>+</sup>: 274.0650; found: 274.0655.

**1'-Acetyl-4',4'-difluoro-6,7,8,9-tetrahydrospiro[benzo[7]annulene-5,2'-pyrrolidin]-5'-one (22)**

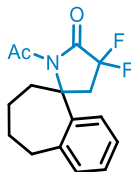

This compound was obtained according to general procedure **2** 5-methylene-6,7,8,9-tetrahydro-5H-benzo[7]annulene (136.1 mg, 0.5 mmol), *fac*-[Ir(ppy)<sub>3</sub>] (3.3 mg, 1.0 mol%), *CDF*A (88 μL, 1.0 mmol), boc<sub>2</sub>O (218.3 mg, 1.0 mmol) and anhydrous MeCN (3 mL). Isolated as a white crystalline solid (54.3 mg, 37% yield) after purification by flash column chromatography (12 g SiO<sub>2</sub>, hexane/EA = 20:1). Spectroscopic data match with those reported in the literature.<sup>13</sup>

<sup>1</sup>H-NMR (300 MHz, CDCl<sub>3</sub>): δ 7.24 – 7.07 (m, 3H), 6.89 – 6.78 (m, 1H), 3.11 – 2.95 (m, 2H), 2.90 – 2.74 (m, 3H), 2.65 (s, 3H), 2.05 – 1.93 (m, 1H), 1.92 – 1.77 (m, 3H), 1.77 – 1.68 (m, 1H).

<sup>13</sup>C-NMR (75 MHz, CDCl<sub>3</sub>): δ 171.1, 163.7 (dd, *J* = 31.3, 28.1 Hz), 140.3, 139.3, 132.1, 127.9, 126.6, 125.8, 116.3 (t, *J* = 251.1 Hz), 68.7 (dd, *J* = 2.5, 2.2 Hz), 42.5 (t, *J* = 19.9 Hz), 37.8, 36.1, 27.4, 26.8, 24.9.

<sup>19</sup>F-NMR (282 MHz, CDCl<sub>3</sub>): δ -102.4 (d, *J* = 274.0 Hz), -104.4 (d, *J* = 275.7 Hz).

**1-Acetyl-3,3-difluoro-5-(4-(((8*R*,9*S*,13*S*,14*S*)-13-methyl-17-oxo-7,8,9,11,12,13,14,15,16,17-decahydro-6*H*-cyclopenta[*a*]phenanthren-3-yl)oxy)methyl)phenyl)pyrrolidin-2-one (23)**

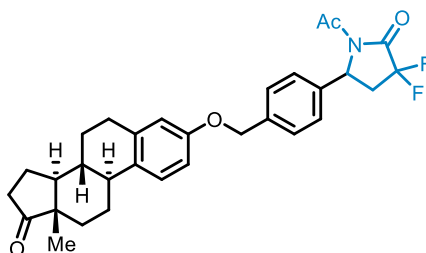

This compound was obtained according to general procedure **2** (8*R*,9*S*,13*S*,14*S*)-13-methyl-3-((4-vinylbenzyl)oxy)-6,7,8,9,11,12,13,14,15,16-decahydro-17*H*-cyclopenta[*a*]phenanthren-17-one (193.1 mg, 0.5 mmol), *fac*-[Ir(ppy)<sub>3</sub>] (3.3 mg, 1.0 mol%), *CDF*A (88 μL, 1.0 mmol), Boc anhydride (218.3 mg, 1.0 mmol) and anhydrous MeCN (3 mL). Isolated as a white crystalline solid (57.4 mg, 22% yield) after purification by flash column chromatography (12 g SiO<sub>2</sub>, hexane/EA = 20:1). Spectroscopic data match with those reported in the literature.<sup>13</sup>

<sup>1</sup>H-NMR (300 MHz, CDCl<sub>3</sub>): δ 7.46 – 7.40 (m, 2H), 7.24 – 7.18 (m, 3H), 6.82 – 6.68 (m, 2H), 5.39 (dt, *J* = 9.2, 2.8 Hz, 1H), 5.01 (s, 2H), 3.08 – 2.78 (m, 3H), 2.60 (s, 3H), 2.58 – 2.44 (m, 2H), 2.20 – 1.90 (m, 5H), 1.69 – 1.40 (m, 7H), 0.91 (s, 3H).

<sup>13</sup>C-NMR (101 MHz, CDCl<sub>3</sub>): δ 221.1, 170.1, 164.2 (dd, *J* = 31.8, 31.5 Hz), 156.8, 139.2, 138.0, 137.7, 132.7, 128.3, 126.6, 125.9 (d, *J* = 1.7 Hz), 117.3 (dd, *J* = 252.0, 251.6 Hz), 115.0, 112.5 (d, *J* = 1.6 Hz), 69.5, 54.6 (dd, *J* = 1.5, 1.5 Hz), 50.6, 48.2, 44.1, 38.5, 37.5 (t, *J* = 21.4 Hz), 36.0, 31.7, 29.8, 26.7, 26.1, 25.7, 21.7, 14.0.

<sup>19</sup>F-NMR (282 MHz, CDCl<sub>3</sub>): δ -99.6 (d, *J* = 275.7 Hz), -103.8 (d, *J* = 275.7 Hz).

### Methyl 2,2-difluoro-6-phenylhexanoate (3)

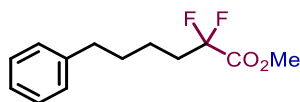

This compound was obtained according to general procedure **3** from but-3-en-1-ylbenzene (95.0  $\mu$ L, 0.5 mmol), *fac*-[Ir(ppy)<sub>3</sub>] (3.3 mg, 1.0 mol%), sodium ascorbate (198 mg, 1.0 mmol), methanol (1.5 mL), anhydrous MeCN (1.5 mL), and CDFA (88  $\mu$ L, 1.0 mmol). Isolated as a transparent gel (96.0 mg, 79% yield) after purification by flash column chromatography (12 g SiO<sub>2</sub>, hexane/EA = 10:1). Spectroscopic data match with those reported in the literature.<sup>15</sup>

**<sup>1</sup>H-NMR** (300 MHz, CDCl<sub>3</sub>):  $\delta$  7.35 – 7.22 (m, 2H), 7.23 – 7.13 (m, 3H), 3.86 (s, 3H), 2.63 (t, *J* = 7.6 Hz, 2H), 2.20 – 1.98 (m, 2H), 1.77 – 1.60 (m, 2H), 1.61 – 1.38 (m, 2H).

**<sup>19</sup>F-NMR** (282 MHz, CDCl<sub>3</sub>):  $\delta$  -105.7 (t, *J* = 16.9 Hz).

### Methyl 2,2-difluoro-5-phenylpentanoate (24)

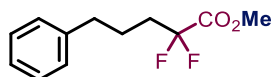

This compound was obtained according to general procedure **3** from allylbenzene (66.0  $\mu$ L, 0.5 mmol), *fac*-[Ir(ppy)<sub>3</sub>] (3.3 mg, 1.0 mol%), sodium ascorbate (198 mg, 1.0 mmol), anhydrous methanol (1.5 mL), anhydrous MeCN (1.5 mL), and CDFA (88  $\mu$ L, 1.0 mmol). Isolated as a transparent gel (82.0 mg, 72% yield) after purification by flash column chromatography (12 g SiO<sub>2</sub>, hexane/EA = 10:1). Spectroscopic data match with those reported in the literature.<sup>16</sup>

**<sup>1</sup>H-NMR** (300 MHz, CDCl<sub>3</sub>):  $\delta$  7.26 – 7.18 (m, 2H), 7.17 – 7.07 (m, 3H), 3.78 (s, 3H), 2.61 (t, *J* = 7.6 Hz, 2H), 2.12 – 1.89 (m, 2H), 1.83 – 1.66 (m, 2H).

**<sup>13</sup>C-NMR** (75 MHz, CDCl<sub>3</sub>):  $\delta$  168.1 – 161.0 (m), 141.0, 128.6, 128.5, 126.3, 116.5 (t, *J* = 253.8 Hz), 53.4, 35.2, 33.9 (d, *J* = 23.2 Hz), 23.2 (t, *J* = 4.2 Hz).

**<sup>19</sup>F-NMR** (282 MHz, CDCl<sub>3</sub>):  $\delta$  -105.7 (t, *J* = 16.8 Hz)

### Methyl 2,2-difluoro-5-phenoxy-pentanoate (25)

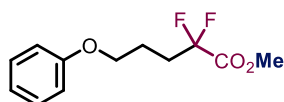

This compound was obtained according to general procedure **3** from (allyloxy)benzene (67.0  $\mu$ L, 0.5 mmol), *fac*-[Ir(ppy)<sub>3</sub>] (3.3 mg, 1.0 mol%), sodium ascorbate (198 mg, 1.0 mmol), anhydrous methanol (1.5 mL), anhydrous MeCN (1.5 mL), and CDFA (88  $\mu$ L, 1.0 mmol). Isolated as a transparent gel (68.3 mg, 56% yield) after purification by flash column chromatography (12 g SiO<sub>2</sub>, hexane/EA = 10:1).

**<sup>1</sup>H-NMR** (400 MHz, CDCl<sub>3</sub>):  $\delta$  7.3 – 7.3 (m, 2H), 7.0 – 6.9 (m, 1H), 6.9 – 6.9 (m, 2H), 4.0 (t, *J* = 6.1 Hz, 2H), 3.9 (s, 3H), 2.4 – 2.2 (m, 2H), 2.1 – 1.9 (m, 2H).

**<sup>13</sup>C-NMR** (101 MHz, CDCl<sub>3</sub>):  $\delta$  164.8 (t, *J* = 33.1 Hz), 158.8, 129.6, 121.1, 116.4 (t, *J* = 250.1 Hz), 114.6, 66.5, 53.5, 31.6 (t, *J* = 23.6 Hz), 21.9.

**<sup>19</sup>F-NMR** (376 MHz, CDCl<sub>3</sub>): -105.9 (t, *J* = 17.1 Hz)

**HRMS** (ESI) *m/z*, [M+Na]<sup>+</sup> calcd for C<sub>12</sub>H<sub>14</sub>O<sub>3</sub>F<sub>2</sub>Na<sup>+</sup>: 267.0803; found: 267.0799.

### Diethyl (1*R*,2*R*)-4-(1,1-difluoro-2-methoxy-2-oxoethyl)cyclohexane-1,2-dicarboxylate (26)

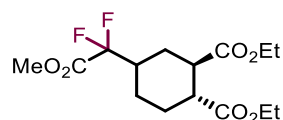

This compound was obtained according to general procedure **3** from diethyl (1*R*,2*R*)-cyclohex-4-ene-1,2-dicarboxylate (100.0  $\mu$ L, 0.5 mmol), *fac*-[Ir(ppy)<sub>3</sub>] (3.3 mg, 1.0 mol%), sodium ascorbate (198 mg, 1.0 mmol), anhydrous methanol (1.5 mL), anhydrous MeCN (1.5 mL), and CDFA (88  $\mu$ L, 1.0 mmol). Isolated as a transparent gel (101.0 mg, 60% yield) after purification by flash column chromatography (12 g SiO<sub>2</sub>, hexane/EA = 10:1). Crude NMR indicated the d.r. ratio 10:1.

<sup>1</sup>H-NMR (300 MHz, CDCl<sub>3</sub>):  $\delta$  4.28 – 4.07 (m, 4H), 3.87 (s, 3H), 3.24 (q, *J* = 4.5 Hz, 1H), 3.06 (q, *J* = 4.3 Hz, 1H), 2.40 – 2.20 (m, 1H), 2.21 – 1.98 (m, 2H), 1.80 – 1.57 (m, 3H), 1.52 – 1.33 (m, 1H), 1.32 – 1.20 (m, 6H).

<sup>13</sup>C-NMR (101 MHz, CDCl<sub>3</sub>): 173.4, 164.6 (t, *J* = 33.1 Hz), 117.3 (t, *J* = 253.1 Hz), 61.0 (d, *J* = 5.5 Hz), 53.4, 41.1, 40.2, 37.9 (t, *J* = 22.1 Hz), 23.6, 23.4 (t, *J* = 4.1 Hz), 21.3 (t, *J* = 3.8 Hz), 14.3 (d, *J* = 2.2 Hz).

<sup>19</sup>F-NMR (282 MHz, CDCl<sub>3</sub>):  $\delta$  -112.4 (d, *J* = 14.9 Hz)

HRMS (ESI) *m/z*, [M+H]<sup>+</sup> calcd for C<sub>15</sub>H<sub>23</sub>O<sub>6</sub>F<sub>2</sub><sup>+</sup>: 337.1457; found: 337.1450.

### 3,3-Difluoro-4-methoxy-4-oxobutyl 4-(*tert*-butyl)benzoate (27)

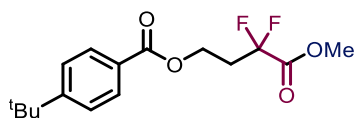

This compound was obtained according to general procedure **3** from vinyl 4-(*tert*-butyl)benzoate (100.0  $\mu$ L, 0.5 mmol), *fac*-[Ir(ppy)<sub>3</sub>] (3.3 mg, 1.0 mol%), sodium ascorbate (198 mg, 1.0 mmol), methanol (1.5 mL), anhydrous MeCN (1.5 mL), and CDFA (88  $\mu$ L, 1.0 mmol). Isolated as a transparent gel (96.0 mg, 61% yield) after purification by flash column chromatography (12 g SiO<sub>2</sub>, hexane/EA = 10:1).

<sup>1</sup>H-NMR (400 MHz, CDCl<sub>3</sub>):  $\delta$  7.93 (d, *J* = 8.6 Hz, 1H), 7.46 (d, *J* = 8.7 Hz, 2H), 4.52 (t, *J* = 6.2 Hz, 2H), 3.78 (s, 3H), 2.60 (tt, *J* = 15.7, 6.2 Hz, 2H), 1.34 (s, 9H).

<sup>13</sup>C-NMR (101 MHz, CDCl<sub>3</sub>):  $\delta$  166.2, 164.4, 157.2, 129.7, 126.9, 125.6, 115.1\*, 57.9 (d, *J* = 6.0 Hz), 53.6, 35.3, 34.4 (t, *J* = 23.7 Hz), 31.3. (\*CF<sub>2</sub> signals are weak)

<sup>19</sup>F-NMR (376 MHz, CDCl<sub>3</sub>):  $\delta$  -105.1 (t, *J* = 15.5 Hz)

HRMS (ESI) *m/z*, [M+NH<sub>4</sub>]<sup>+</sup> calcd for C<sub>16</sub>H<sub>20</sub>O<sub>4</sub>F<sub>2</sub>+NH<sub>4</sub><sup>+</sup>: 332.1668; found: 332.1661.

### Methyl 2-((3*S*,8*R*,9*S*,10*R*,13*S*,14*S*,17*S*)-3-acetoxy-17-acetyl-10,13-dimethylhexadecahydro-1*H*-cyclopenta[*a*]phenanthren-6-yl)-2,2-difluoroacetate (28)

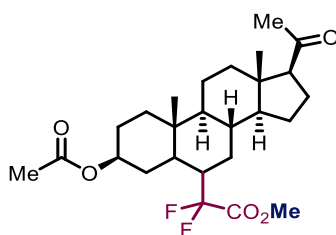

This compound was obtained according to general procedure **3** from Pregnenolone acetate (180.0 mg, 0.5 mmol), *fac*-[Ir(ppy)<sub>3</sub>] (3.3 mg, 1.0 mol%), sodium ascorbate (198 mg, 1.0 mmol), methanol (1.5

mL), anhydrous MeCN (1.5 mL), and CDFA (88  $\mu$ L, 1.0 mmol). Isolated as a transparent gel (122.0 mg, 52% yield) after purification by flash column chromatography (12 g SiO<sub>2</sub>, hexane/EA = 10:1).

**<sup>1</sup>H-NMR** (400 MHz, CDCl<sub>3</sub>):  $\delta$  4.62 – 4.47 (m, 1H), 3.78 (s, 3H), 2.48 – 2.29 (m, 2H), 2.16 – 2.07 (m, 1H), 2.04 (s, 3H), 1.96 (s, 3H), 1.84 – 1.70 (m, 4H), 1.68 – 1.37 (m, 8H), 1.36 – 0.96 (m, 6H), 0.94 – 0.88 (m, 3H), 0.68 – 0.59 (m, 1H), 0.57 (s, 3H).

**<sup>13</sup>C-NMR** (101 MHz, CDCl<sub>3</sub>):  $\delta$  209.4, 170.8, 165.6 (dd,  $J$  = 34.7, 32.6 Hz), 118.6 (dd,  $J$  = 258.3, 256.5 Hz), 74.2, 63.9, 56.6, 54.8, 53.4, 45.8, 44.3, 41.2 (dd,  $J$  = 22.0, 19.6 Hz), 39.8, 39.0, 35.2, 32.7 (d,  $J$  = 5.9 Hz), 32.2 (d,  $J$  = 2.5 Hz), 31.7 (d,  $J$  = 5.7 Hz), 31.6, 27.6, 24.4, 22.9, 21.5, 21.2, 15.0 (dd,  $J$  = 9.6, 3.5 Hz), 13.7.

**<sup>19</sup>F-NMR** (376 MHz, CDCl<sub>3</sub>):  $\delta$  -99.8 (dd,  $J$  = 255.1, 12.1 Hz), -103.2 (dd,  $J$  = 255.1, 29.6 Hz).

**HRMS** (ESI)  $m/z$ , [M+Na]<sup>+</sup> calcd for C<sub>26</sub>H<sub>38</sub>O<sub>5</sub>F<sub>2</sub>Na<sup>+</sup>: 491.2580; found: 491.2565.

### 6,6-Difluoro-7-methoxy-7-oxoheptyl benzoate (29)

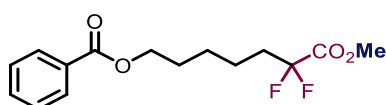

This compound was obtained according to general procedure **1** from pent-4-en-1-yl benzoate (95.0  $\mu$ L, 0.5 mmol), *fac*-[Ir(ppy)<sub>3</sub>] (3.3 mg, 1.0 mol%), sodium ascorbate (198 mg, 1.0 mmol), anhydrous MeOH (1.5 mL), anhydrous MeCN (1.5 mL), and CDFA (88  $\mu$ L, 1.0 mmol). Isolated as a transparent gel (108.0 mg, 71% yield) after purification by flash column chromatography (12 g SiO<sub>2</sub>, hexane/EA = 10:1).

**<sup>1</sup>H-NMR** (400 MHz, CDCl<sub>3</sub>):  $\delta$  8.08 – 7.99 (m, 2H), 7.60 – 7.51 (m, 1H), 7.49 – 7.39 (m, 2H), 4.32 (t,  $J$  = 6.5 Hz, 2H), 3.86 (s, 3H), 2.19 – 2.01 (m, 2H), 1.79 (dq,  $J$  = 7.9, 6.6 Hz, 2H), 1.63 – 1.45 (m, 4H).

**<sup>13</sup>C-NMR** (101 MHz, CDCl<sub>3</sub>):  $\delta$  166.7, 164.9 (t,  $J$  = 33.2 Hz), 133.0, 130.5, 129.7, 128.5, 116.4 (t,  $J$  = 250.0 Hz), 64.7, 53.4, 34.6 (t,  $J$  = 23.2 Hz), 28.6, 25.8, 21.4 (t,  $J$  = 4.3 Hz).

**<sup>19</sup>F-NMR** (376 MHz, CDCl<sub>3</sub>):  $\delta$  -105.7 (t,  $J$  = 16.5 Hz).

### 7-Ethoxy-6,6-difluoro-7-oxoheptyl benzoate (30)

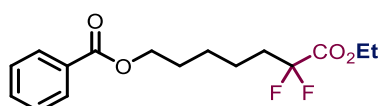

This compound was obtained according to general procedure **3** from pent-4-en-1-yl benzoate (95.0  $\mu$ L, 0.5 mmol), *fac*-[Ir(ppy)<sub>3</sub>] (3.3 mg, 1.0 mol%), sodium ascorbate (198 mg, 1.0 mmol), anhydrous EtOH (1.5 mL), anhydrous MeCN (1.5 mL), and CDFA (88  $\mu$ L, 1.0 mmol). Isolated as a transparent gel (121.0 mg, 77% yield) after purification by flash column chromatography (12 g SiO<sub>2</sub>, hexane/EA = 10:1). Spectroscopic data match with those reported in the literature.<sup>17</sup>

**<sup>1</sup>H-NMR** (300 MHz, CDCl<sub>3</sub>):  $\delta$  8.08 – 7.99 (m, 2H), 7.60 – 7.52 (m, 1H), 7.49 – 7.39 (m, 2H), 4.39 – 4.25 (m, 4H), 2.20 – 1.98 (m, 2H), 1.80 (p,  $J$  = 6.7 Hz, 2H), 1.66 – 1.44 (m, 6H), 1.35 (t,  $J$  = 7.1 Hz, 3H).

**<sup>19</sup>F-NMR** (282 MHz, CDCl<sub>3</sub>):  $\delta$  -106.0 (t,  $J$  = 16.6 Hz)

**HRMS** (ESI)  $m/z$ , [M+NH<sub>4</sub>]<sup>+</sup> calcd for C<sub>16</sub>H<sub>20</sub>O<sub>4</sub>F<sub>2</sub>+NH<sub>4</sub><sup>+</sup>: 332.1668; found: 332.1661.

### 6,6-Difluoro-7-isopropoxy-7-oxoheptyl benzoate (31)

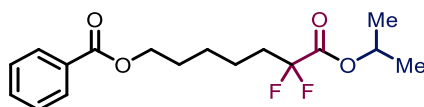

This compound was obtained according to general procedure **3** from pent-4-en-1-yl benzoate (95.0  $\mu\text{L}$ , 0.5 mmol), *fac*-[Ir(ppy)<sub>3</sub>] (3.3 mg, 1.0 mol%), sodium ascorbate (198 mg, 1.0 mmol), anhydrous isopropanol (1.5 mL), anhydrous MeCN (1.5 mL), and CDFA (88  $\mu\text{L}$ , 1.0 mmol). Isolated as a transparent gel (113.0 mg, 69% yield) after purification by flash column chromatography (12 g SiO<sub>2</sub>, hexane/EA = 10:1).

<sup>1</sup>H-NMR (400 MHz, CDCl<sub>3</sub>):  $\delta$  8.08 – 7.99 (m, 2H), 7.60 – 7.51 (m, 1H), 7.49 – 7.40 (m, 2H), 5.21 – 5.07 (m, 1H), 4.32 (t, *J* = 6.3 Hz, 2H), 2.16 – 2.00 (m, 2H), 1.85 – 1.74 (m, 2H), 1.63 – 1.46 (m, 3H), 1.32 (d, *J* = 6.3 Hz, 6H).

<sup>13</sup>C-NMR (101 MHz, CDCl<sub>3</sub>): 166.8, 164.0 (t, *J* = 32.9 Hz), 133.0, 130.5, 129.7, 128.5, 116.3 (t, *J* = 250.2 Hz), 71.1, 64.8, 34.5 (t, *J* = 23.3 Hz), 28.6, 25.8, 21.7, 21.4 (d, *J* = 4.4 Hz).

<sup>19</sup>F-NMR (376 MHz, CDCl<sub>3</sub>):  $\delta$  -106.1 (t, *J* = 16.8 Hz)

HRMS (ESI) *m/z*, [M+Na]<sup>+</sup> calcd for C<sub>17</sub>H<sub>22</sub>O<sub>4</sub>F<sub>2</sub>Na<sup>+</sup>: 351.1384; found: 351.1368.

#### 6,6-Difluoro-7-(methoxy-*d*<sub>3</sub>)-7-oxoheptyl benzoate (**32**)

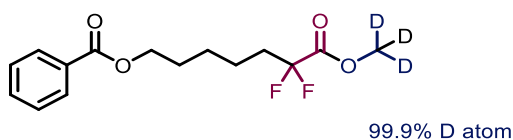

This compound was obtained according to general procedure **3** from pent-4-en-1-yl benzoate (95.0  $\mu\text{L}$ , 0.5 mmol), *fac*-[Ir(ppy)<sub>3</sub>] (3.3 mg, 1.0 mol%), sodium ascorbate (198 mg, 1.0 mmol), methanol-*d*<sub>4</sub> (1.5 mL, 99.9% from ampules sigma Aldrich), anhydrous MeCN (1.5 mL), and CDFA (88  $\mu\text{L}$ , 1.0 mmol). Isolated as a transparent gel (109.0 mg, 72% yield) after purification by flash column chromatography (12 g SiO<sub>2</sub>, hexane/EA = 10:1).

<sup>1</sup>H-NMR (400 MHz, CDCl<sub>3</sub>):  $\delta$  8.08 – 7.99 (m, 2H), 7.60 – 7.52 (m, 1H), 7.49 – 7.40 (m, 2H), 4.32 (t, *J* = 6.5 Hz, 2H), 2.18 – 2.00 (m, 2H), 1.85 – 1.74 (m, 2H), 1.63 – 1.45 (m, 3H).

<sup>13</sup>C-NMR (101 MHz, CDCl<sub>3</sub>):  $\delta$  166.8, 165.0 (t, *J* = 33.2 Hz), 133.0, 130.5, 129.7, 128.5, 116.4 (t, *J* = 250.0 Hz), 64.8, 39.8 – 37.2 (m), 34.6 (t, *J* = 23.2 Hz), 28.6, 25.8, 21.4.

<sup>19</sup>F-NMR (282 MHz, CDCl<sub>3</sub>):  $\delta$  -105.7 (t, *J* = 16.9 Hz).

HRMS (ESI) *m/z*, [M+H]<sup>+</sup> calcd for C<sub>15</sub>H<sub>15</sub>D<sub>3</sub>F<sub>2</sub>O<sub>4</sub><sup>+</sup>: 304.1427; found: 304.1427

#### 5-(4-(*tert*-Butyl)phenyl)-3-fluorodihydrofuran-2(3*H*)-one (**33**)

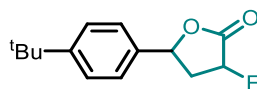

This compound was obtained according to general procedure **3** from 4-*tert*-butylstyrene (95.0  $\mu\text{L}$ , 0.5 mmol), *fac*-[Ir(ppy)<sub>3</sub>] (3.3 mg, 1.0 mol%), *chlorofluoroacetic acid* (74  $\mu\text{L}$ , 1.0 mmol), and anhydrous DMF (1 mL). Collected 108 mg of diastereomeric mixture (1:1, 76% yield). After purification by flash column chromatography (12 g SiO<sub>2</sub>, hexane/EA = 20:1). We were able to isolate single diastereomer as a white crystalline solid.

**<sup>1</sup>H-NMR** (300 MHz, CDCl<sub>3</sub>): δ 7.49 – 7.38 (m, 2H), 7.25 – 7.20 (m, 2H), 5.72 (t, *J* = 6.6 Hz, 1H), 5.23 (ddd, *J* = 51.5, 6.6, 4.5 Hz, 1H), 2.88 (dddd, *J* = 22.9, 14.3, 6.6, 4.5 Hz, 1H), 2.56 (ddt, *J* = 26.0, 14.3, 6.6 Hz, 1H), 1.33 (s, 3H).

**<sup>13</sup>C-NMR** (75 MHz, CDCl<sub>3</sub>): δ 171.2 (d, *J* = 20.3 Hz), 152.3, 134.9, 126.1, 125.2, 86.5 (d, *J* = 185.8 Hz), 79.3 (d, *J* = 3.0 Hz), 37.7 (d, *J* = 20.3 Hz), 34.8, 31.4.

**<sup>19</sup>F-NMR** (282 MHz, CDCl<sub>3</sub>): δ -194.1.

**FT-IR** (ATR, neat; cm<sup>-1</sup>): 3005, 2961, 2866, 1779, 1275, 1261.

**HRMS** (ESI) *m/z*, [M+H]<sup>+</sup> calcd for C<sub>14</sub>H<sub>18</sub>FO<sub>2</sub><sup>+</sup>: 237.1286, 238.1319; found: 237.1282, 238.1316.

#### 5-(4-(*tert*-Butyl)phenyl)-3,3-difluorodihydrofuran-2(3*H*)-one (1)

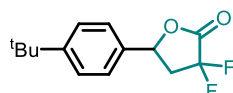

This compound was obtained according to general procedure 1 from 4-*tert*-butylstyrene (90.0 μL, 0.5 mmol), *fac*-[Ir(ppy)<sub>3</sub>] (3.3 mg, 1.0 mol%), *CDFA* (88 μL, 1.0 mmol) or *BDFA* (175.0 mg, 1.0 mmol), and anhydrous DMF (1 mL). Isolated as a white crystalline solid (133.0 mg, 90% yield for *CDFA*, 125.6 mg, 85% yield for *BDFA*) after purification by flash column chromatography (12 g SiO<sub>2</sub>, hexane/EA = 20:1). Spectroscopic data match with those reported in the literature.<sup>13</sup>

**<sup>1</sup>H-NMR** (300 MHz, CDCl<sub>3</sub>): δ 7.51 – 7.41 (m, 2H), 7.33 – 7.23 (m, 2H), 5.59 (dd, *J* = 9.0, 6.2 Hz, 1H), 3.21 – 3.01 (m, 1H), 2.80 – 2.54 (m, 1H), 1.33 (s, 9H).

**<sup>13</sup>C-NMR** (126 MHz, CDCl<sub>3</sub>): δ 165.1 (dd, *J* = 33.9, 31.8 Hz), 153.2, 133.2, 126.2, 125.8, 115.9 (dd, *J* = 259.0, 249.8 Hz), 77.3 – 77.2 (m), 40.0 (dd, *J* = 22.2, 20.5 Hz), 34.9, 31.4.

**<sup>19</sup>F-NMR** (282 MHz, CDCl<sub>3</sub>): δ -106.5 (d, *J* = 279.1 Hz), -109.3 (d, *J* = 279.1 Hz).

#### 5-(4-(*tert*-Butyl)phenyl)-3-(chloromethyl)dihydrofuran-2(3*H*)-one (34)

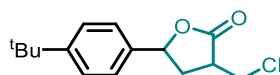

This compound was obtained according to general procedure 1 from 4-*tert*-butylstyrene (90.0 μL, 0.5 mmol), *fac*-[Ir(ppy)<sub>3</sub>] (3.3 mg, 1.0 mol%), 2,3-dichloropropanoic acid (94 μL, 1.0 mmol), and anhydrous DMF (1 mL). Collected 104 mg of diastereomeric mixture (1:1, 78% yield). After purification by flash column chromatography (12 g SiO<sub>2</sub>, hexane/EA = 20:1). We were able to isolate single diastereomer as a white crystalline solid.

**<sup>1</sup>H-NMR** (500 MHz, CDCl<sub>3</sub>): δ 7.45 – 7.38 (m, 2H), 7.28 – 7.20 (m, 2H), 5.64 (dd, *J* = 8.4, 4.1 Hz, 1H), 3.92 – 3.79 (m, 2H), 3.19 – 3.10 (m, 1H), 2.82 – 2.73 (m, 1H), 2.55 – 2.46 (m, 1H), 1.32 (s, 1H).

**<sup>13</sup>C-NMR** (126 MHz, CDCl<sub>3</sub>): δ 175.8, 151.7, 136.6, 125.9, 124.9, 79.1, 43.5, 41.6, 34.8, 34.0, 31.4.

**FT-IR** (ATR, neat; cm<sup>-1</sup>): 2959, 2869, 2360, 1761, 1198, 1151.

**HRMS** (ESI) *m/z*, [M+H]<sup>+</sup> calcd for C<sub>15</sub>H<sub>20</sub>ClO<sub>2</sub><sup>+</sup>: 267.1146; found: 267.1145.

#### 5-(4-(*tert*-Butyl)phenyl)-3-chlorodihydrofuran-2(3*H*)-one (35)

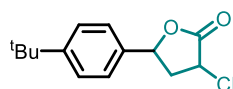



This compound was obtained according to general procedure **1** from 4-*tert*-butylstyrene (90.0  $\mu$ L, 0.5 mmol, 1.0 equiv), *fac*-[Ir(ppy)<sub>3</sub>] (3.3 mg, 5.0  $\mu$ mol, 1.0 mol%), 2,2-dichloroacetic acid (90  $\mu$ L, 1.0 mmol, 2.0 equiv), and anhydrous DMF (15 mL). Collected 106 mg of diastereomeric mixture of white solids (1:1, 84% yield). After purification by flash column chromatography (24 g SiO<sub>2</sub>, hexane/EA = 20:1).

**diastereomer 1:** <sup>1</sup>H-NMR (500 MHz, CDCl<sub>3</sub>):  $\delta$  7.47 – 7.41 (m, 1H), 7.34 – 7.26 (m, 1H), 5.41 (dd, *J* = 10.3, 5.6 Hz, 1H), 4.70 (dd, *J* = 11.2, 8.3 Hz, 1H), 3.19 (ddd, *J* = 13.2, 8.3, 5.6 Hz, 1H), 2.49 (ddd, *J* = 13.2, 11.2, 10.3 Hz, 1H), 1.33 (s, 5H).

<sup>13</sup>C-NMR (126 MHz, CDCl<sub>3</sub>):  $\delta$  172.0, 152.6, 134.3, 126.0, 125.8, 78.8, 51.8, 41.5, 34.8, 31.4.

**diastereomer 2:** <sup>1</sup>H-NMR (500 MHz, CDCl<sub>3</sub>):  $\delta$  7.46 – 7.39 (m, 2H), 7.29 – 7.24 (m, 2H), 5.75 (dd, *J* = 8.6, 5.8 Hz, 1H), 4.54 (dd, *J* = 6.7, 2.7 Hz, 1H), 2.80 (ddd, *J* = 14.4, 5.8, 2.7 Hz, 1H), 2.66 (ddd, *J* = 14.4, 8.6, 6.7 Hz, 1H), 1.32 (s, 9H).

<sup>13</sup>C-NMR (126 MHz, CDCl<sub>3</sub>):  $\delta$  172.0, 152.4, 134.3, 126.0, 125.5, 80.0, 51.5, 41.6, 34.9, 31.4.

**FT-IR** (ATR, neat; cm<sup>-1</sup>): 2958, 2901, 2862, 2162, 1783, 1514, 1179.

**HRMS** (ESI) *m/z*, [M+H]<sup>+</sup> calcd for C<sub>14</sub>H<sub>18</sub>O<sub>2</sub>Cl<sup>+</sup>: 253.0990; found: 253.0989.

### 5-(4-(*tert*-Butyl)phenyl)-3,3-dichlorodihydrofuran-2(3*H*)-one (**36**)

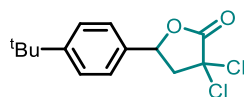

This compound was obtained according to general procedure **1** from 4-*tert*-butylstyrene (90.0  $\mu$ L, 0.5 mmol), *fac*-[Ir(ppy)<sub>3</sub>] (3.3 mg, 1.0 mol%), trichloroacetic acid (164.0 mg, 1.0 mmol), and anhydrous DMF (1 mL). Isolated as a white crystalline solid (116.0 mg, 81% yield) after purification by flash column chromatography (12 g SiO<sub>2</sub>, hexane/EA = 20:1).

<sup>1</sup>H-NMR (300 MHz, CDCl<sub>3</sub>):  $\delta$  7.48 – 7.42 (m, 2H), 7.40 – 7.23 (m, 2H), 5.59 (dd, *J* = 10.1, 4.9 Hz, 1H), 3.41 (dd, *J* = 14.2, 5.0 Hz, 1H), 2.94 (dd, *J* = 14.3, 10.1 Hz, 1H), 1.33 (s, 9H).

<sup>13</sup>C-NMR (75 MHz, CDCl<sub>3</sub>):  $\delta$  167.7, 153.1, 132.5, 126.2, 125.9, 78.8, 77.7, 52.4, 34.9, 31.4.

**FT-IR** (ATR, neat; cm<sup>-1</sup>): 2963, 2903, 2361, 2340, 1788, 1614, 1517, 1321.

### 3-bromo-5-(4-(*tert*-Butyl)phenyl)dihydrofuran-2(3*H*)-one (**37**)

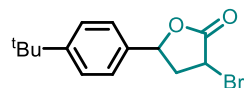

This compound was obtained according to general procedure **1** from 4-*tert*-butylstyrene (90.0  $\mu$ L, 0.5 mmol), *fac*-[Ir(ppy)<sub>3</sub>] (3.3 mg, 1.0 mol%), dibromoacetic acid (218 mg, 1.0 mmol), and anhydrous DMF (1 mL). Collected 131 mg of diastereomeric mixture (3:2, 88% yield). After purification by flash column chromatography (12 g SiO<sub>2</sub>, hexane/EA = 20:1). We were able to isolate single diastereomer as a white crystalline solid.

<sup>1</sup>H-NMR (300 MHz, CDCl<sub>3</sub>):  $\delta$  7.49 – 7.38 (m, 2H), 7.35 – 7.27 (m, 2H), 5.73 (dd, *J* = 9.4, 5.4 Hz, 1H), 4.55 (dd, *J* = 6.5, 1.7 Hz, 1H), 2.82 (ddd, *J* = 14.9, 5.5, 1.7 Hz, 1H), 2.75 – 2.63 (m, 1H), 1.33 (s, 9H).

<sup>13</sup>C-NMR (75 MHz, CDCl<sub>3</sub>):  $\delta$  172.4, 152.4, 134.0, 126.0, 125.7, 80.4, 42.1, 39.1, 34.8, 31.3.

**HRMS** (EI) *m/z*, [M]<sup>+</sup> calcd for C<sub>14</sub>H<sub>17</sub>BrO<sub>2</sub><sup>+</sup>: 296.0412, 298.0391, 297.0445, 299.0425; found: 296.0410, 298.0390, 297.0444, 299.0422.

**(3*S*,5*R*)-5-(4-(*tert*-Butyl)phenyl)-3-methyldihydrofuran-2(3*H*)-one (38)**

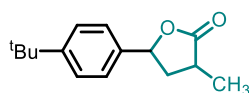

This Compound was obtained according to general procedure **1** from 4-*tert*-butylstyrene (90.0  $\mu$ L, 0.5 mmol, 1.0 equiv), *fac*-[Ir(ppy)<sub>3</sub>] (3.3 mg, 5.0  $\mu$ mol, 1.0 mol%), 2-bromopropanoic acid (45  $\mu$ L, 1.0 mmol, 2.0 equiv), and anhydrous DMF (1 mL). Collected 97 mg of diastereomeric mixture of white solids (1:1, 83% yield). After purification by flash column chromatography (24 g SiO<sub>2</sub>, hexane/EA = 20:1).

**diastereomer 1:** <sup>1</sup>H-NMR (500 MHz, CDCl<sub>3</sub>):  $\delta$  7.43 – 7.37 (m, 2H), 7.27 – 7.21 (m, 2H), 5.55 (dd, *J* = 7.8, 4.6 Hz, 1H), 2.80 – 2.69 (m, 1H), 2.50 – 2.41 (m, 1H), 2.39 – 2.29 (m, 1H), 1.33 (s, 3H), 1.32 (s, 9H).

<sup>13</sup>C-NMR (126 MHz, CDCl<sub>3</sub>):  $\delta$  180.1, 151.4, 136.8, 125.7, 124.9, 78.4, 38.3, 34.7, 33.8, 31.4, 15.5.

**diastereomer 2:** <sup>1</sup>H-NMR (500 MHz, CDCl<sub>3</sub>):  $\delta$  7.44 – 7.38 (m, 2H), 7.32 – 7.26 (m, 2H), 5.34 (dd, *J* = 10.7, 5.2 Hz, 1H), 2.88 – 2.73 (m, 3H), 1.93 – 1.82 (m, 1H), 1.34 (s, 3H), 1.32 (s, 9H).

<sup>13</sup>C-NMR (126 MHz, CDCl<sub>3</sub>):  $\delta$  179.3, 151.7, 136.1, 125.7, 125.5, 79.3, 39.9, 36.5, 34.7, 31.4, 15.1.

**FT-IR** (ATR, neat; cm<sup>-1</sup>): 2955, 2899, 2867, 1770, 1457, 1360, 1168.

**HRMS** (ESI) *m/z*, [M+H]<sup>+</sup> calcd for C<sub>15</sub>H<sub>21</sub>O<sub>2</sub><sup>+</sup>: 233.1536; found: 233.1536.

**2-Bromo-3,4,5-trimethoxy-1-(prop-1-en-1-yl)benzene (39a)**

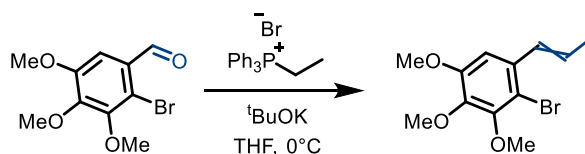

This compound was obtained according to following procedure:

To a suspension of 2-bromo-3,4,5-trimethoxybenzaldehyde (0.59 g, 2.14 mmol), ethyltriphenylphosphonium bromide (1.20 g, 3.2 mmol) in THF (25 ml) was slowly added portion wise at 0°C tBuOK powder (0.34 g, 3.0 mmol) under N<sub>2</sub> atmosphere. The reaction mixture was allowed to warm at room temperature for 6h. The completion of the reaction was monitored by TLC, then 10 ml of saturated NH<sub>4</sub>Cl solution was added. Reaction mixture was diluted by 40 ml of distilled H<sub>2</sub>O, extracted 3x25 ml EtOAc. Combined organic phase was dried with MgSO<sub>4</sub>, filtered, evaporated and purified by flash column chromatography (12g SiO<sub>2</sub>, hexane/EA = 20:1). 2-Bromo-3,4,5-trimethoxy-1-(prop-1-en-1-yl)benzene was isolated as a yellowish oil (0.45 g, 73% yield, *E/Z* ratio 3:2).

<sup>1</sup>H-NMR (300 MHz, CDCl<sub>3</sub>):  $\delta$  6.82 (s, 1H), 6.71 (dq, *J* = 15.6, 1.8 Hz, 1H), 6.66 (s, 1.5H), 6.43 (dq, *J* = 11.4, 1.8, 0.6 Hz, 1.5H), 6.09 (dq, *J* = 15.5, 6.6 Hz, 1H), 5.85 (dq, *J* = 11.4, 7.1 Hz, 1.5H), 3.91 – 3.89 (m, 9H), 3.89 – 3.86 (m, 9H), 3.85 (s, 4.5H), 1.92 (dd, *J* = 6.6, 1.8 Hz, 3H), 1.80 (dd, *J* = 7.1, 1.8 Hz, 4.5H).

<sup>13</sup>C-NMR (75 MHz, CDCl<sub>3</sub>):  $\delta$  152.8, 152.2, 151.1, 150.9, 142.4, 142.0, 133.6, 133.1, 130.1, 129.6, 128.3, 127.8, 110.5, 109.9, 109.6, 105.5, 61.3, 61.1, 61.0, 56.3, 56.2, 18.7, 14.6.

**HRMS** (EI) *m/z*, [M]<sup>+</sup> calcd for C<sub>12</sub>H<sub>15</sub>BrO<sub>3</sub><sup>+</sup>: 286.0205, 288.0184, 287.0238 289.0218; found: 286.0202, 288.0181, 287.0236, 289.0215.

### 5-(2-Bromo-3,4,5-trimethoxyphenyl)-3,4-dimethyldihydrofuran-2(3H)-one (39)

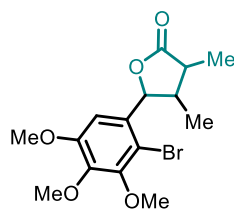

This compound was obtained according to general procedure **1** from 2-bromo-3,4,5-trimethoxy-1-(prop-1-en-1-yl)benzene (**29a**) (143.6 mg, 0.5 mmol), *fac*-[Ir(ppy)<sub>3</sub>] (3.3 mg, 1.0 mol%), 2-bromopropionic acid (90 μL, 1.0 mmol), and anhydrous DMF (1 mL). Collected 53.9 mg of diastereomeric mixture (4:1, 30% yield). After purification by flash column chromatography (12 g SiO<sub>2</sub>, hexane/EA = 20:1). We were able to isolate single diastereomer as a white crystalline solid. Spectroscopic data match with those reported in the literature.<sup>20</sup>

**<sup>1</sup>H-NMR** (300 MHz, CDCl<sub>3</sub>): δ 6.69 (s, 1H), 5.44 (d, *J* = 9.4 Hz, 1H), 3.90 (s, 3H), 3.89 (s, 3H), 3.86 (s, 3H), 2.40 (dq, *J* = 11.6, 7.0 Hz, 1H), 2.00 (ddq, *J* = 11.5, 9.4, 6.6 Hz, 1H), 1.30 (d, *J* = 7.1 Hz, 3H), 1.22 (d, *J* = 6.6 Hz, 3H).

**<sup>13</sup>C-NMR** (75 MHz, CDCl<sub>3</sub>): δ 178.7, 153.5, 150.8, 143.6, 132.7, 109.9, 106.2, 84.2, 61.2, 61.2, 56.5, 49.0, 43.5, 15.2, 13.2.

**HRMS** (ESI) *m/z*, [M+H]<sup>+</sup> calcd for C<sub>15</sub>H<sub>20</sub>BrO<sub>5</sub><sup>+</sup>: 359.0489, 361.0469, 360.0523, 362.0502; found: 359.0489, 361.0467, 360.0523, 362.0500.

### 5-(4-(*tert*-Butyl)phenyl)-3-isopropyldihydrofuran-2(3H)-one (40)

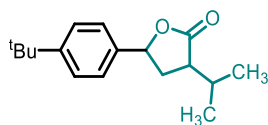

This compound was obtained according to general procedure **1** from 4-*tert*-butylstyrene (94%, 95.0 μL, 0.5 mmol, 1.0 equiv), *fac*-[Ir(ppy)<sub>3</sub>] (3.3 mg, 5.0 μmol, 1.0 mol%), 2-chloro-3-methylbutanoic acid (134 μL, 1.0 mmol, 2.0 equiv), and anhydrous DMF (1 mL). Collected 115 mg of diastereomeric mixture of white solids (1:1, 89% yield). After purification by flash column chromatography (24 g SiO<sub>2</sub>, hexane/EA = 20:1).

**diastereomer 1:** **<sup>1</sup>H-NMR** (500 MHz, CDCl<sub>3</sub>): δ 7.43 – 7.37 (m, 2H), 7.28 – 7.21 (m, 2H), 5.50 (dd, *J* = 8.2, 4.7 Hz, 1H), 2.61 (ddd, *J* = 9.3, 8.2, 5.3 Hz, 1H), 2.51 (dt, *J* = 13.0, 8.2 Hz, 1H), 2.31 – 2.17 (m, 2H), 1.32 (s, 9H), 1.06 (d, *J* = 6.8 Hz, 3H), 1.00 (d, *J* = 6.8 Hz, 3H).

**<sup>13</sup>C-NMR** (126 MHz, CDCl<sub>3</sub>): δ 178.7, 151.3, 137.4, 125.7, 124.9, 78.7, 45.0, 34.7, 32.4, 31.4, 28.5, 20.7, 18.9.

**diastereomer 2:** **<sup>1</sup>H-NMR** (500 MHz, CDCl<sub>3</sub>): δ 7.45 – 7.37 (m, 2H), 7.31 – 7.28 (m, 2H), 5.31 (dd, *J* = 10.7, 5.9 Hz, 1H), 2.78 – 2.69 (m, 1H), 2.63 – 2.46 (m, 1H), 2.32 – 2.18 (m, 1H), 2.02 – 1.92 (m, 1H), 1.33 (s, 9H), 1.07 (d, *J* = 6.7 Hz, 3H), 0.96 (d, *J* = 6.9 Hz, 3H).

**<sup>13</sup>C-NMR** (126 MHz, CDCl<sub>3</sub>): δ 177.8, 151.6, 136.4, 125.7, 125.4, 79.1, 47.5, 34.7, 33.3, 31.4, 27.6, 20.8, 18.3.

**FT-IR** (ATR, neat; cm<sup>-1</sup>): 2959, 2904, 2870, 1768, 1465, 1362.

**HRMS** (ESI) *m/z*, [M+H]<sup>+</sup> calcd for C<sub>14</sub>H<sub>18</sub>ClO<sub>2</sub><sup>+</sup>: 261.1849 found: 261.1849

### 5-(4-(*tert*-Butyl)phenyl)-3,3-dimethyldihydrofuran-2(3*H*)-one (41)

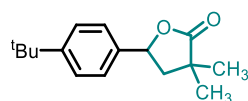

This compound was obtained according to general procedure **1** from 4-*tert*-butylstyrene (90.0  $\mu$ L, 0.5 mmol), *fac*-[Ir(ppy)<sub>3</sub>] (3.3 mg, 1.0 mol%), 2-bromo-2-methylpropionic acid (167.0 mg, 1.0 mmol), and anhydrous DMF (1 mL). Isolated as a white crystalline solid (108.4 mg, 88% yield) after purification by flash column chromatography (12 g SiO<sub>2</sub>, hexane/EA = 20:1).

**<sup>1</sup>H-NMR** (300 MHz, CDCl<sub>3</sub>):  $\delta$  7.46 – 7.36 (m, 2H), 7.31 – 7.25 (m, 2H), 5.43 (dd,  $J$  = 10.0, 6.2 Hz, 1H), 2.46 (dd,  $J$  = 12.8, 6.2 Hz, 1H), 2.09 (dd,  $J$  = 12.9, 10.0 Hz, 1H), 1.37 (s, 3H), 1.33 (s, 9H), 1.31 (s, 3H).

**<sup>13</sup>C-NMR** (75 MHz, CDCl<sub>3</sub>):  $\delta$  181.8, 151.5, 136.4, 125.7, 125.3, 77.7, 46.0, 40.9, 34.7, 31.4, 25.1, 24.3.

**FT-IR** (ATR, neat; cm<sup>-1</sup>): 2964, 2868, 2361, 1768, 1461, 1326.

**HRMS** (NSI)  $m/z$ , [M+H]<sup>+</sup> calcd for C<sub>16</sub>H<sub>23</sub>O<sub>2</sub><sup>+</sup>: 247.1693, 248.1727; found: 247.1691, 248.1724.

### 5-(4-(*tert*-Butyl)phenyl)-3-phenyldihydrofuran-2(3*H*)-one (42)

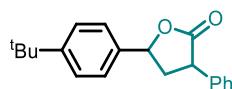

This compound was obtained according to general procedure **1** from 4-*tert*-butylstyrene (90.0  $\mu$ L, 0.5 mmol), *fac*-[Ir(ppy)<sub>3</sub>] (3.3 mg, 1.0 mol%), *chloro-phenyl-acetic acid* (170.6 mg, 1.0 mmol), and anhydrous DMF (1 mL). Collected 117.8 mg of diastereomeric mixture of white solids (1:1, 80% yield). After purification by flash column chromatography (24 g SiO<sub>2</sub>, hexane/EA = 20:1).

**diastereomer 1:** **<sup>1</sup>H-NMR** (300 MHz, CDCl<sub>3</sub>):  $\delta$  7.50 – 7.15 (m, 9H), 5.68 (dd,  $J$  = 7.4, 5.4 Hz, 1H), 4.02 – 3.90 (m, 1H), 2.91 – 2.66 (m, 2H), 1.34 (s, 9H).

**<sup>13</sup>C-NMR** (75 MHz, CDCl<sub>3</sub>):  $\delta$  177.2, 151.6, 136.7, 136.3, 129.0, 127.8, 127.7, 125.8, 124.9, 78.8, 45.2, 39.2, 34.6, 31.3.

**diastereomer 2:** **<sup>1</sup>H-NMR** (300 MHz, CDCl<sub>3</sub>):  $\delta$  7.50 – 7.23 (m, 9H), 5.50 (dd,  $J$  = 10.8, 5.5 Hz, 1H), 4.04 (dd,  $J$  = 12.9, 8.4 Hz, 1H), 3.05 (ddd,  $J$  = 12.8, 8.4, 5.5 Hz, 1H), 2.42 (td,  $J$  = 12.8, 10.8 Hz, 1H), 1.34 (s, 9H).

**<sup>13</sup>C-NMR** (75 MHz, CDCl<sub>3</sub>):  $\delta$  176.6, 152.0, 136.3, 135.7, 129.0, 128.3, 127.9, 125.9, 125.6, 79.3, 47.8, 40.5, 34.8, 31.4.

**FT-IR** (ATR, neat; cm<sup>-1</sup>): 2961, 2866, 1766, 1706, 1493, 1455, 1361.

**HRMS** (NSI)  $m/z$ , [M+H]<sup>+</sup> calcd for C<sub>20</sub>H<sub>23</sub>O<sub>2</sub><sup>+</sup>: 295.1693, 296.1727; found: 295.1690, 296.1723.

### 7-(4-(*tert*-Butyl)phenyl)-6-oxaspiro[3.4]octan-5-one (43)

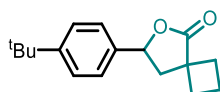

This compound was obtained according to general procedure **1** from 4-*tert*-butylstyrene (90.0  $\mu$ L, 0.5 mmol), *fac*-[Ir(ppy)<sub>3</sub>] (3.3 mg, 1.0 mol%), 1-bromocyclobutane-1-carboxylic acid (179.0 mg, 1.0 mmol), and anhydrous DMF (1 mL). Isolated as a white crystalline solid (117.5 mg, 91% yield) after purification by flash column chromatography (12 g SiO<sub>2</sub>, hexane/EA = 20:1).

**<sup>1</sup>H-NMR** (300 MHz, CDCl<sub>3</sub>): δ 7.44 – 7.31 (m, 2H), 7.28 – 7.20 (m, 2H), 5.32 (dd, *J* = 9.0, 6.2 Hz, 1H), 2.75 (dd, *J* = 12.9, 6.1 Hz, 1H), 2.67 – 2.44 (m, 2H), 2.33 – 1.87 (m, 6H), 1.31 (s, 9H).

**<sup>13</sup>C-NMR** (75 MHz, CDCl<sub>3</sub>): δ 180.9, 151.5, 136.3, 125.7, 125.3, 78.1, 44.9, 44.5, 34.7, 31.7, 31.4, 29.2, 16.6.

**FT-IR** (ATR, neat; cm<sup>-1</sup>): 2959, 2867, 1753, 1689, 1606, 1460, 1300.

**HRMS** (ESI) *m/z*, [M+H]<sup>+</sup> calcd for C<sub>17</sub>H<sub>23</sub>O<sub>2</sub><sup>+</sup>: 259.1693, 260.1727; found: 259.1690, 260.1723.

#### 5-(4-(*tert*-Butyl)phenyl)-3-tetradecyldihydrofuran-2(3*H*)-one (44)

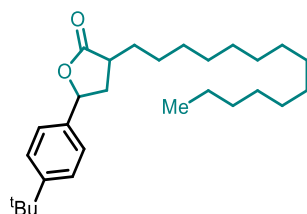

This compound was obtained according to general procedure **1** from 4-*tert*-butylstyrene (90.0 μL, 0.5 mmol), *fac*-[Ir(ppy)<sub>3</sub>] (3.3 mg, 1.0 mol%), 2-bromopalmitic acid (335 mg, 1.0 mmol), and anhydrous DMF (1 mL). Collected 180.4 mg of diastereomeric mixture of white solids (1:1, 87% yield). After purification by flash column chromatography (24 g SiO<sub>2</sub>, hexane/EA = 20:1).

**diastereomer 1:** **<sup>1</sup>H-NMR** (300 MHz, CDCl<sub>3</sub>): δ 7.45 – 7.35 (m, 2H), 7.28 – 7.19 (m, 2H), 5.53 (dd, *J* = 7.2, 5.4 Hz, 1H), 2.73 – 2.58 (m, 1H), 2.47 – 2.31 (m, 2H), 1.96 – 1.83 (m, 1H), 1.61 – 1.35 (m, 4H), 1.32 (s, 9H), 1.26 (br s, 21H), 0.93 – 0.83 (m, 3H).

**<sup>13</sup>C-NMR** (75 MHz, CDCl<sub>3</sub>): δ 179.6, 151.4, 137.0, 125.8, 125.0, 78.8, 39.1, 36.5, 34.7, 32.1, 31.4, 30.7, 29.8, 29.8, 29.8, 29.8, 29.7, 29.6, 29.5, 29.5, 27.5, 22.8, 14.3.

**diastereomer 2:** **<sup>1</sup>H-NMR** (300 MHz, CDCl<sub>3</sub>): δ 7.49 – 7.35 (m, 2H), 7.33 – 7.23 (m, 2H), 5.34 (dd, *J* = 10.6, 5.2 Hz, 1H), 2.82 – 2.65 (m, 2H), 2.02 – 1.76 (m, 2H), 1.57 – 1.21 (m, 34H), 1.01 – 0.80 (m, 3H).

**<sup>13</sup>C-NMR** (75 MHz, CDCl<sub>3</sub>): δ 178.9, 151.7, 136.3, 125.7, 125.4, 79.5, 41.6, 38.0, 34.7, 32.1, 31.4, 30.3, 29.8, 29.8, 29.8, 29.8, 29.7, 29.6, 29.5, 27.5, 22.8, 14.3.

**FT-IR** (ATR, neat; cm<sup>-1</sup>): 2955, 2915, 2848, 1753, 1468, 1361, 1185, 1167.

**HRMS** (ESI) *m/z*, [M+H]<sup>+</sup> calcd for C<sub>28</sub>H<sub>47</sub>O<sub>2</sub><sup>+</sup>: 415.3571, 416.3605, 417.3638; found: 415.3562, 416.3595, 417.3629.

#### 5-(4-(*tert*-Butyl)phenyl)dihydrofuran-2(3*H*)-one (45)

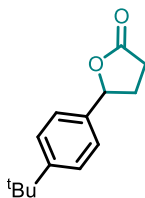

This compound was obtained according to general procedure **1** from 4-*tert*-butylstyrene (90.0 μL, 0.5 mmol), *fac*-[Ir(ppy)<sub>3</sub>] (3.3 mg, 1.0 mol%), chloroacetic acid (94.5 mg, 1.0 mmol), and anhydrous DMF (1 mL). Isolated as a white crystalline solid (80.7 mg, 74% yield) after purification by flash column chromatography (12 g SiO<sub>2</sub>, hexane/EA = 20:1).

**<sup>1</sup>H-NMR** (300 MHz, CDCl<sub>3</sub>): δ 7.47 – 7.34 (m, 2H), 7.33 – 7.22 (m, 2H), 5.50 (dd, *J* = 8.1, 6.2 Hz, 1H), 2.73 – 2.56 (m, 3H), 2.33 – 2.14 (m, 1H), 1.33 (s, 9H).

**<sup>13</sup>C-NMR** (75 MHz, CDCl<sub>3</sub>): δ 177.2, 151.8, 136.4, 125.8, 125.3, 81.4, 34.8, 31.4, 31.0, 29.2.

**FT-IR** (ATR, neat; cm<sup>-1</sup>): 2955, 2866, 1759, 1615, 1509, 1458.

### 1-Acetyl-5-(4-(*tert*-butyl)phenyl)-3,3-difluoropyrrolidin-2-one (2)

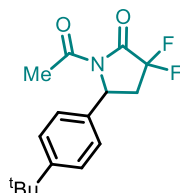

This compound was obtained according to general procedure **2** 4-*tert*-butylstyrene (90.0 μL, 0.5 mmol), *fac*-[Ir(ppy)<sub>3</sub>] (3.3 mg, 1.0 mol%), *CDF*A (88 μL, 1.0 mmol), Boc anhydride (218.3 mg, 1.0 mmol) and anhydrous MeCN (3 mL). Isolated as a white crystalline solid (81.0 mg, 55% yield) after purification by flash column chromatography (12 g SiO<sub>2</sub>, hexane/EA = 20:1). Spectroscopic data match with those reported in the literature.<sup>13</sup>

**<sup>1</sup>H-NMR** (400 MHz, CDCl<sub>3</sub>): δ 7.36 7.46 – 7.32 (m, 2H), 7.16 – 7.09 (m, 2H), 5.37 (dt, *J* = 9.3, 3.0 Hz, 1H), 2.90 (dddd, *J* = 19.6, 16.7, 15.1, 9.3 Hz, 1H), 2.59 (s, 3H), 2.57 – 2.48 (m, 1H), 1.30 (s, 9H).

**<sup>13</sup>C-NMR** (101 MHz, CDCl<sub>3</sub>): δ 170.2, 164.3 (dd, *J* = 31.5, 31.3 Hz), 151.5, 136.4, 126.1, 125.4 (d, *J* = 2.1 Hz), 117.4 (dd, *J* = 253.3, 251.8 Hz), 54.5 (dd, *J* = 2.1, 1.7 Hz), 37.5 (t, *J* = 21.4 Hz), 34.7, 31.4, 25.7.

**<sup>19</sup>F-NMR** (376 MHz, CDCl<sub>3</sub>): δ -99.7 (dt, *J* = 278.7, 20.0 Hz), -103.5 (ddd, *J* = 275.8, 16.9, 6.9 Hz).

### 1-Acetyl-5-(4-(*tert*-butyl)phenyl)-3-chloropyrrolidin-2-one (46)

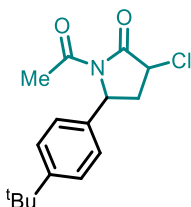

This compound was obtained according to general procedure **2** 4-*tert*-butylstyrene (90.0 μL, 0.5 mmol), *fac*-[Ir(ppy)<sub>3</sub>] (3.3 mg, 1.0 mol%), *dichloroacetic acid* (83 μL, 1.0 mmol), Boc anhydride (218.3 mg, 1.0 mmol) and anhydrous MeCN (3 mL). Collected 64.4 mg of diastereomeric mixture (1:1, 44% yield). After purification by flash column chromatography (12 g SiO<sub>2</sub>, hexane/EA = 20:1). We were able to isolate single diastereomer as a white crystalline solid.

**<sup>1</sup>H-NMR** (400 MHz, CDCl<sub>3</sub>): δ 7.38 – 7.30 (m, 2H), 7.13 – 7.01 (m, 2H), 5.43 (dd, *J* = 6.5, 4.1 Hz, 1H), 4.69 (dd, *J* = 9.7, 8.6 Hz, 1H), 2.66 – 2.61 (m, 2H), 2.61 (s, 3H), 1.29 (s, 9H).

**<sup>13</sup>C-NMR** (101 MHz, CDCl<sub>3</sub>): δ 171.2, 170.4, 151.2, 136.5, 126.2, 124.8, 77.4, 57.1, 54.5, 38.8, 31.4, 25.4.

**FT-IR** (ATR, neat; cm<sup>-1</sup>): 2958, 2901, 2862, 2162, 1783, 1327, 1179.

### 1-Acetyl-5-(4-(*tert*-butyl)phenyl)-3,3-dichloropyrrolidin-2-one (47)

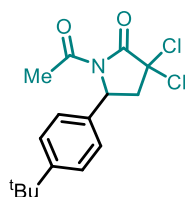

This compound was obtained according to general procedure 2 from 4-*tert*-butylstyrene (90.0  $\mu$ L, 0.5 mmol), *fac*-[Ir(ppy)<sub>3</sub>] (3.3 mg, 1.0 mol%), *trichloroacetic acid* (164.0 mg, 1.0 mmol), Boc anhydride (218.3 mg, 1.0 mmol) and anhydrous MeCN (3 mL). Isolated as a white crystalline solid (85.3 mg, 52% yield) after purification by flash column chromatography (12 g SiO<sub>2</sub>, hexane/EA = 20:1).

<sup>1</sup>H-NMR (300 MHz, CDCl<sub>3</sub>):  $\delta$  7.41 – 7.28 (m, 2H), 7.17 – 7.07 (m, 2H), 5.24 (t, *J* = 7.1 Hz, 1H), 3.33 (dd, *J* = 14.8, 7.4 Hz, 1H), 2.80 (dd, *J* = 14.8, 6.8 Hz, 1H), 2.59 (s, 3H), 1.30 (s, 9H).

<sup>13</sup>C-NMR (75 MHz, CDCl<sub>3</sub>):  $\delta$  170.7, 167.4, 151.3, 135.7, 126.0, 125.3, 80.6, 57.3, 49.6, 34.7, 31.4, 25.7.

FT-IR (ATR, neat; cm<sup>-1</sup>): 2964, 1762, 1714, 1372, 1328, 1243, 1230.

HRMS (ESI) *m/z*, [M+H]<sup>+</sup> calcd for C<sub>16</sub>H<sub>20</sub>O<sub>2</sub>NCl<sub>2</sub><sup>+</sup>: 328.0866; found: 328.0861.

### 5-Methyl-5-(*p*-tolyl)dihydrofuran-2(3*H*)-one, ( $\pm$ )-boivinianin A (48)

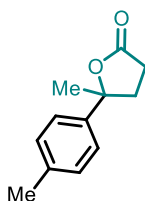

This compound was obtained according to general procedure 1 from 1-methyl-4-(prop-1-en-2-yl)benzene (73.0  $\mu$ L, 0.5 mmol), *fac*-[Ir(ppy)<sub>3</sub>] (3.3 mg, 1.0 mol%), *chloroacetic acid* (94.5 mg, 1.0 mmol), and anhydrous DMF (1 mL). Isolated as a white crystalline solid (70.4 mg, 74% yield) after purification by flash column chromatography (12 g SiO<sub>2</sub>, hexane/EA = 20:1).<sup>18</sup>

<sup>1</sup>H-NMR (300 MHz, CDCl<sub>3</sub>):  $\delta$  7.30 – 7.23 (m, 2H), 7.21 – 7.14 (m, 2H), 2.69 – 2.36 (m, 4H), 2.35 (s, 3H), 1.71 (s, 3H).

<sup>13</sup>C-NMR (75 MHz, CDCl<sub>3</sub>):  $\delta$  176.8, 141.4, 137.5, 129.3, 124.2, 87.2, 36.3, 29.5, 29.1, 21.1.

HRMS (ESI) *m/z*, [M+Na]<sup>+</sup> calcd for C<sub>12</sub>H<sub>14</sub>O<sub>2</sub>+Na<sup>+</sup>: 213.0886, 214.0920; found: 213.0888, 214.0921.

### 3,3-Difluoro-5-methyl-5-(*p*-tolyl)dihydrofuran-2(3*H*)-one (49)

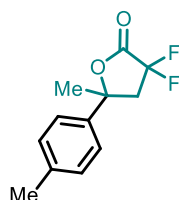

This compound was obtained according to general procedure 1 from 4-*tert*-butylstyrene (73.0  $\mu$ L, 0.5 mmol), *fac*-[Ir(ppy)<sub>3</sub>] (3.3 mg, 1.0 mol%), *CDFA* (88  $\mu$ L, 1.0 mmol), and anhydrous DMF (1 mL). Isolated as a white crystalline solid (92.0 mg, 81% yield) after purification by flash column chromatography (12 g SiO<sub>2</sub>, hexane/EA = 20:1).

**<sup>1</sup>H-NMR** (300 MHz, CDCl<sub>3</sub>): δ 7.28 – 7.16 (m, 4H), 3.01 – 2.87 (m, 2H), 2.36 (s, 3H), 1.81 (s, 3H).

**<sup>13</sup>C-NMR** (75 MHz, CDCl<sub>3</sub>): δ 165.4 (dd, *J* = 32.9, 32.1 Hz), 139.7 (d, *J* = 1.4 Hz), 138.5, 129.7, 123.9, 116.2 (dd, *J* = 252.8, 252.8 Hz), 84.1 (dd, *J* = 3.7, 3.6 Hz), 45.1 (t, *J* = 20.5 Hz), 30.3, 21.1.

**<sup>19</sup>F-NMR** (282 MHz, CDCl<sub>3</sub>): δ -101.8 (d, *J* = 280.9 Hz), -104.8 (d, *J* = 280.9 Hz).

**FT-IR** (ATR, neat; cm<sup>-1</sup>): 2957, 2923, 1810, 1725, 1514, 1493, 1031.

**HRMS** (EI) *m/z*, [M]<sup>+</sup> calcd for C<sub>12</sub>H<sub>12</sub>F<sub>2</sub>O<sub>2</sub><sup>+</sup>: 226.0805, 227.0839; found: 226.0803, 227.0837.

### 2-(Benzo[*d*][1,3]dioxol-5-yl)-3,4,5-trimethoxybenzaldehyde (**50**)

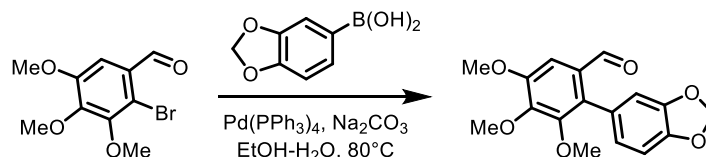

This compound was obtained according to following procedure:

A suspension of 2-bromo-3,4,5-trimethoxybenzaldehyde (0.86 g, 3.14 mmol), benzo[*d*][1,3]dioxol-5-ylboronic acid (0.52 g, 3.14 mmol), Pd(PPh<sub>3</sub>)<sub>4</sub> (0.020 g, 0.017 mmol) and Na<sub>2</sub>CO<sub>3</sub> in EtOH-H<sub>2</sub>O 8:1 (v/v, 9 ml) was vigorously stirred for 8h at 80°C. Then reaction mixture was allowed cooling to the room temperature, extracted 3x15 ml EtOAc, organic phases were combined, dried with MgSO<sub>4</sub>, filtered and evaporated to provide crude residue, which was purified further by flash column chromatography (12g SiO<sub>2</sub>, hexane/EA = 9:1), **40** was isolated as a brownish solid (0.93 g, 94% yield).<sup>19</sup>

**<sup>1</sup>H-NMR** (300 MHz, CDCl<sub>3</sub>): δ 9.69 (s, 1H), 7.33 (s, 1H), 6.92 – 6.81 (m, 2H), 6.73 (dd, *J* = 7.9, 1.7 Hz, 1H), 6.04 (s, 2H), 3.99 (s, 3H), 3.95 (s, 3H), 3.64 (s, 3H).

**<sup>13</sup>C-NMR** (75 MHz, CDCl<sub>3</sub>): δ 191.4, 153.2, 151.4, 147.7, 147.6, 147.6, 134.1, 130.1, 126.4, 125.0, 111.4, 108.0, 105.3, 101.4, 61.3, 61.2, 56.3.

**HRMS** (ESI) *m/z*, [M+H]<sup>+</sup> calcd for C<sub>17</sub>H<sub>17</sub>O<sub>6</sub><sup>+</sup>: 317.1020, 318.1054; found: 317.1015, 318.1049.

### 5-(2,3,4-Trimethoxy-6-(prop-1-en-1-yl)phenyl)benzo[*d*][1,3]dioxole (**51**)

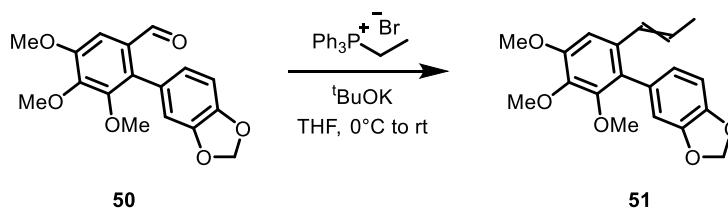

This compound was obtained according to following procedure:

To a suspension of **50** (1.080 g, 3.46 mmol), ethyltriphenylphosphonium bromide (1.7 g, 4.5 mmol) in THF (25 ml) was slowly added portionwise at 0°C <sup>t</sup>BuOK powder (0.5 g, 4.1 mmol) under N<sub>2</sub> atmosphere. The reaction mixture was allowed to warm at room temperature for 24h. The completion of the reaction was monitored by TLC, then 10 ml of saturated NH<sub>4</sub>Cl solution was added. Reaction mixture was diluted by 40 ml of distilled H<sub>2</sub>O and extracted 3x25 ml EtOAc. Combined organic phase was dried with MgSO<sub>4</sub>, filtered, evaporated and purified by flash column chromatography (12g SiO<sub>2</sub>, hexane/EA = 20:1), **51** was isolated as a yellowish oil (1.0 g, 89% yield). Crude NMR indicates the *E/Z* ratio 3:1.



**<sup>1</sup>H-NMR** (300 MHz, CDCl<sub>3</sub>): δ 6.90 – 6.78 (m, 1.67H), 6.76 – 6.62 (m, 3.66H), 6.17 – 5.99 (m, 2.66H), 5.98 (s, 2H), 5.60 (dq, *J* = 11.6, 7.1 Hz, 1H), 3.92 (s, 4H), 3.90 – 3.84 (m, 5H), 3.63 (s, 3H), 3.61 (s, 1H), 1.82 (dd, *J* = 7.1, 1.8 Hz, 3H), 1.75 (dd, *J* = 6.0, 1.1 Hz, 1H).

**<sup>13</sup>C-NMR** (75 MHz, CDCl<sub>3</sub>): δ 152.7, 151.9, 151.6, 147.3, 147.1, 146.5, 146.4, 141.4, 141.2, 132.7, 132.2, 130.4, 130.2, 129.6, 129.4, 128.4, 127.4, 126.0, 125.8, 124.2, 124.1, 111.3, 111.3, 108.8, 108.0, 107.9, 106.1, 104.1, 101.1, 101.0, 61.1, 61.1, 61.0, 56.2, 56.1, 56.1, 18.6, 14.7.

**FT-IR** (ATR, neat; cm<sup>-1</sup>): 2933, 2832, 1589, 1559, 1504, 1478, 1452.

**HRMS** (ESI) *m/z*, [M+H]<sup>+</sup> calcd for C<sub>19</sub>H<sub>21</sub>O<sub>5</sub><sup>+</sup>: 329.1384, 330.1418; found: 329.1375, 330.1408.

### 3,4-*epi*-Eupomatilone-6 and 4-*epi*-eupomatilone-6 (52)

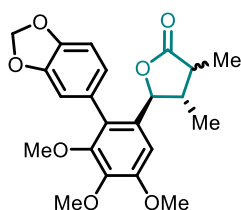

3,4-*epi*-eupomatilone-6  
4-*epi*-eupomatilone-6 = 1.1 : 1

This compound was obtained according to general procedure **1** from **51** (164.2 mg, 0.5 mmol), *fac*-[Ir(ppy)<sub>3</sub>] (3.3 mg, 1.0 mol%), 2-bromopropionic acid (90 μL, 1.0 mmol), and anhydrous DMF (1 mL). Isolated as a white powder (174.2 mg, 87% yield) after purification by flash column chromatography (12 g SiO<sub>2</sub>, hexane/EA = 4:1). NMR shows the inseparable d.r. ratio 1.1:1. Spectroscopic data match with those reported in the literature.<sup>20</sup>

**<sup>1</sup>H-NMR** (400 MHz, CDCl<sub>3</sub>): δ 6.91 – 6.81 (m, 2H), 6.74 – 6.68 (m, 4H), 6.67 – 6.60 (m, 2H), 6.05 – 5.97 (m, 4H), 5.06 (dd, *J* = 39.9, 4.4 Hz, 0.9H), 4.79 (t, *J* = 9.8 Hz, 1.1H), 3.95 – 3.84 (m, 12H), 3.66 – 3.57 (m, 6H), 2.81 – 2.68 (m, 0.95H), 2.45 – 2.31 (m, 0.95H), 2.21 – 2.10 (m, 1.05H), 2.09 – 1.98 (m, 1.05H), 1.24 (d, *J* = 6.8 Hz, 3.30H), 1.07 (dd, *J* = 7.5, 4.3 Hz, 2.70H), 0.87 (dd, *J* = 6.4, 3.7 Hz, 3.30H), 0.67 (dd, *J* = 9.9, 7.2 Hz, 2.70H).

**<sup>13</sup>C-NMR** (101 MHz, CDCl<sub>3</sub>): δ 180.1 (d, *J* = 1.2 Hz), 178.8 (d, *J* = 7.9 Hz), 153.4 (d, *J* = 1.7 Hz), 153.2 (d, *J* = 3.3 Hz), 151.9 (d, *J* = 3.7 Hz), 151.4 (d, *J* = 5.0 Hz), 147.8 (d, *J* = 2.5 Hz), 147.5 (d, *J* = 11.2 Hz), 147.0 (d, *J* = 5.8 Hz), 142.7 (d, *J* = 2.1 Hz), 142.1 (d, *J* = 3.7 Hz), 132.9 (d, *J* = 5.8 Hz), 130.8 (d, *J* = 10.8 Hz), 130.0, 129.1 (d, *J* = 2.9 Hz), 129.0, 127.6 (d, *J* = 9.5 Hz), 124.4, 124.2, 123.5, 123.0, 111.5, 111.4, 110.7, 110.3, 108.5, 108.3 (d, *J* = 3.3 Hz), 108.0, 105.3 (d, *J* = 4.1 Hz), 103.8, 101.3 (t, *J* = 4.6 Hz), 83.0, 82.8 (d, *J* = 10.0 Hz), 61.2 (d, *J* = 10.0 Hz), 61.2 (d, *J* = 9.1 Hz), 56.3 (d, *J* = 2.9 Hz), 47.7 (d), 43.5 (d, *J* = 2.5 Hz), 41.7 (d, *J* = 10.0 Hz), 37.2, 14.4 (d, *J* = 2.5 Hz), 13.5 (d, *J* = 2.5 Hz), 13.0 (d), 9.9 (d, *J* = 2.1 Hz).

**HRMS** (ESI) *m/z*, [M+H]<sup>+</sup> calcd for C<sub>22</sub>H<sub>25</sub>O<sub>7</sub><sup>+</sup>: 401.1595, 402.1629; found: 401.1588, 402.1622.

**FT-IR** (ATR, neat; cm<sup>-1</sup>): 2938, 1774, 1595, 1503, 1482, 1455, 1436.

**<sup>1</sup>H NMR correlation with reported data:**

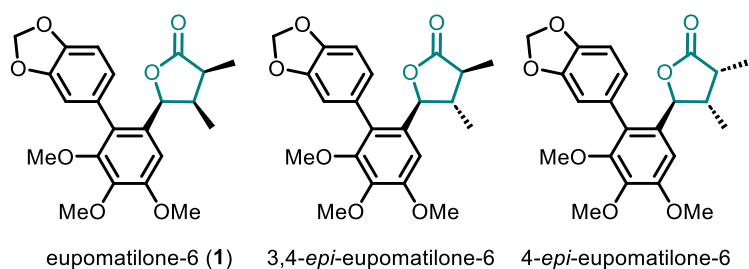

|          | <b>eupomatilone-6 (1)</b> | <b>3,4 <i>epi</i>-1</b>              | <b>3,4 <i>epi</i>-1</b>              | <b>4 <i>epi</i>-1</b>                                      | <b>4 <i>epi</i>-1</b>                                      |
|----------|---------------------------|--------------------------------------|--------------------------------------|------------------------------------------------------------|------------------------------------------------------------|
| <b>H</b> | Taylor <sup>21</sup>      | Hall <sup>20</sup> (300 MHz)         | This work (400 MHz)                  | Hall <sup>20</sup> (300 MHz)                               | This work (400 MHz)                                        |
| 3-Me     | δ 1.20, 1.19, d           | δ 1.23, d<br><i>J</i> = 6.9 Hz       | δ 1.24, d<br><i>J</i> = 6.8 Hz       | δ 1.07, d <i>J</i> = 7.3 Hz<br>δ 1.08, d <i>J</i> = 7.3 Hz | δ 1.07, dd<br><i>J</i> = 7.5, 4.3 Hz                       |
| 4-Me     | δ 0.70, 0.73, d           | δ 0.86, 0.87, d<br><i>J</i> = 6.4 Hz | δ 0.87, dd<br><i>J</i> = 6.4, 3.7 Hz | δ 0.66, d <i>J</i> = 7.1 Hz<br>0.69, d <i>J</i> = 7.1 Hz   | δ 0.67, dd<br><i>J</i> = 9.9, 7.2 Hz                       |
| H-3      | δ 2.36, 2.37, m           | δ 2.14, m                            | δ 2.16, m                            | δ 2.75, m                                                  | δ 2.75, m                                                  |
| H-4      | δ 2.36, 1.97, m           | δ 2.03, m                            | δ 2.03, m                            | δ 2.39, m                                                  | δ 2.38, m                                                  |
| H-5      | δ 5.54, 5.65, d           | δ 4.78, 4.80, d<br><i>J</i> = 9.8 Hz | δ 4.79, t<br><i>J</i> = 9.8 Hz       | δ 5.01, d <i>J</i> = 4.5 Hz<br>5.11, d <i>J</i> = 4.5 Hz   | δ 5.01, d <i>J</i> = 4.4 Hz<br>δ 5.11, d <i>J</i> = 4.4 Hz |

**Table S14:** <sup>1</sup>H NMR correlation with reported data for Eupomatilone-6.

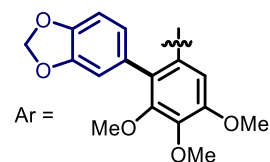

## 11. X-Ray Data

### X-RAY CRYSTAL STRUCTURE REPORT

Sample No.: 23DK001 (11)

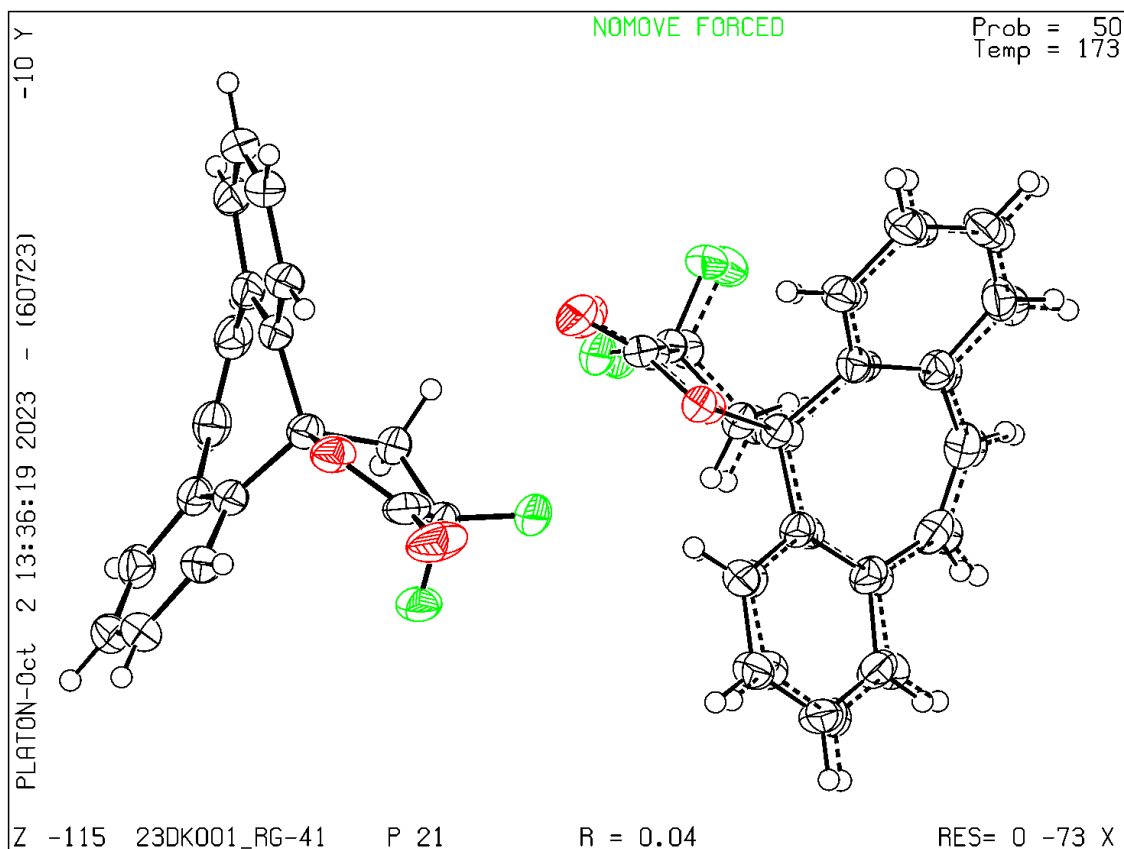

## EXPERIMENTAL

**Crystal-Structure Determination.** A crystal of  $C_{18}H_{12}F_2O_2$  was dissolved using acetone under the microscope, then immersed in parabar oil, mounted at ambient conditions and transferred into the stream of nitrogen (173 K). All measurements were made on a *RIGAKU Synergy S* area-detector diffractometer<sup>22</sup> using mirror optics monochromated Cu  $K\alpha$  radiation ( $\lambda = 1.54184 \text{ \AA}$ ). The unit cell constants and an orientation matrix for data collection were obtained from a least-squares refinement of the setting angles of reflections in the range  $3.771^\circ < \theta < 80.116^\circ$ . A total of 5736 frames were collected using  $\omega$  scans, with 1.5 seconds exposure time (5 s for high-angle reflections), a rotation angle of  $0.5^\circ$  per frame, a crystal-detector distance of 31.0 mm, at  $T = 173.01(10) \text{ K}$ .

Data reduction was performed using the *CrysAlisPro* program. The intensities were corrected for Lorentz and polarization effects, and a numerical absorption correction based on gaussian integration over a multifaceted crystal model with additional empirical absorption correction using spherical harmonics using SCALE3 ABSPACK in *CrysAlisPro* was applied. Data collection and refinement parameters are given in **Table S15**.

The structure was solved by intrinsic phasing using *SHELXT*<sup>23</sup>, which revealed the positions of all non-hydrogen atoms of the title compound. All non-hydrogen atoms were refined anisotropically. H-atoms were assigned in geometrically calculated positions and refined using a riding model where each H-atom was assigned a fixed isotropic displacement parameter with a value equal to 1.2Ueq of its parent atom (1.5Ueq for methyl groups).

Refinement of the structure was carried out on  $F^2$  using full-matrix least-squares procedures, which minimized the function  $\Sigma w(F_o^2 - F_c^2)^2$ . The weighting scheme was based on counting statistics and included a factor to downweight the intense reflections. All calculations were performed using the *SHELXL-2014/7*<sup>24</sup> program in OLEX2.<sup>25</sup>

Signs of a super structure could be detected during the data reduction, the structure is refined using the super cell, and therefore contains two independent molecules in the asymmetric unit. In addition, one of the molecules is fully disorder. A disorder model was used for this one molecule where the occupancies of each disorder component was refined through the use of a free variable. The sum of equivalent components was constrained to 1, i.e. 100%. The SAME restraints were used in the refinement to reduce the number of parameters on the refinement. Since checkcif is unable to detect this restrain, an incorrect alert is raised regarding the ratio of total number of reflections/parameter.

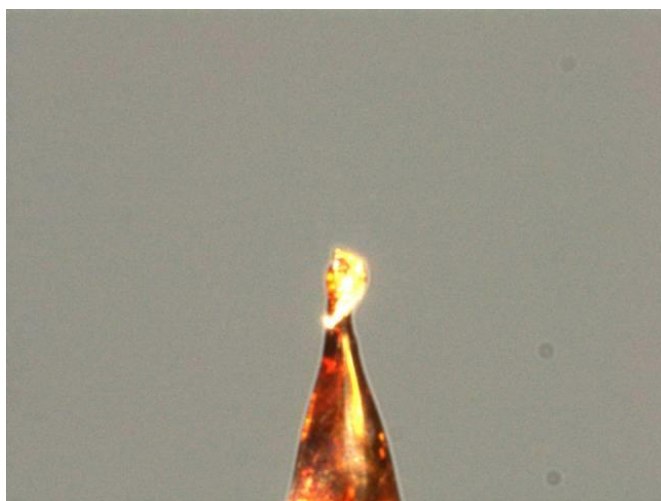

**Figure S19:** A single crystal of the compound mounted on a loop.

**Table S15** Crystal data and structure refinement for 23DK001\_11.

|                                             |                                                               |
|---------------------------------------------|---------------------------------------------------------------|
| Identification code                         | 23DK001_10                                                    |
| Empirical formula                           | C <sub>18</sub> H <sub>12</sub> F <sub>2</sub> O <sub>2</sub> |
| Formula weight                              | 298.28                                                        |
| Temperature/K                               | 173.01(10)                                                    |
| Crystal system                              | monoclinic                                                    |
| Space group                                 | P2 <sub>1</sub>                                               |
| a/Å                                         | 10.05628(17)                                                  |
| b/Å                                         | 5.83820(12)                                                   |
| c/Å                                         | 23.8712(4)                                                    |
| α/°                                         | 90                                                            |
| β/°                                         | 100.5648(17)                                                  |
| γ/°                                         | 90                                                            |
| Volume/Å <sup>3</sup>                       | 1377.74(4)                                                    |
| Z                                           | 4                                                             |
| ρ <sub>calc</sub> /cm <sup>3</sup>          | 1.438                                                         |
| μ/mm <sup>-1</sup>                          | 0.938                                                         |
| F(000)                                      | 616.0                                                         |
| Crystal size/mm <sup>3</sup>                | 0.118 × 0.084 × 0.056                                         |
| Radiation                                   | Cu Kα (λ = 1.54184)                                           |
| 2θ range for data collection/°              | 7.534 to 161.372                                              |
| Index ranges                                | -12 ≤ h ≤ 12, -6 ≤ k ≤ 7, -30 ≤ l ≤ 30                        |
| Reflections collected                       | 28713                                                         |
| Independent reflections                     | 5747 [R <sub>int</sub> = 0.0277, R <sub>sigma</sub> = 0.0221] |
| Data/restraints/parameters                  | 5747/497/597                                                  |
| Goodness-of-fit on F <sup>2</sup>           | 1.065                                                         |
| Final R indexes [I >= 2σ (I)]               | R <sub>1</sub> = 0.0386, wR <sub>2</sub> = 0.1097             |
| Final R indexes [all data]                  | R <sub>1</sub> = 0.0412, wR <sub>2</sub> = 0.1114             |
| Largest diff. peak/hole / e Å <sup>-3</sup> | 0.20/-0.17                                                    |
| Flack parameter                             | -0.01(11)                                                     |

**Fractional Atomic Coordinates ( $\times 10^4$ ) and Equivalent Isotropic Displacement Parameters ( $\text{\AA}^2 \times 10^3$ ) for 23DK001\_11.  $U_{\text{eq}}$  is defined as 1/3 of the trace of the orthogonalised  $U_{\text{H}}$  tensor.**

| Atom | <i>x</i>   | <i>y</i> | <i>z</i>   | $U_{\text{eq}}$ |
|------|------------|----------|------------|-----------------|
| C2B  | 9912(2)    | 8005(5)  | 1408.0(9)  | 32.2(5)         |
| C3B  | 10471(2)   | 9840(6)  | 1741.1(10) | 37.4(6)         |
| C4B  | 11865(2)   | 10074(6) | 1902.0(11) | 42.4(6)         |
| C5B  | 12715(2)   | 8423(7)  | 1749.1(11) | 44.9(7)         |
| C6B  | 12169(2)   | 6567(6)  | 1423.9(10) | 41.1(6)         |
| C7B  | 10766(2)   | 6339(5)  | 1235.5(10) | 34.3(5)         |
| C8B  | 10312(2)   | 4375(6)  | 871.6(11)  | 39.6(6)         |
| C9B  | 9184(3)    | 4111(5)  | 481.5(10)  | 38.3(6)         |
| C10B | 8101(2)    | 5773(5)  | 302.3(10)  | 34.3(6)         |
| C11B | 7368(3)    | 5575(6)  | -254.2(10) | 39.9(6)         |
| C12B | 6405(3)    | 7167(6)  | -482.3(10) | 43.3(7)         |
| C13B | 6146(3)    | 9005(6)  | -156.0(11) | 42.1(6)         |
| C14B | 6827(2)    | 9209(6)  | 405.1(10)  | 36.7(6)         |
| C15B | 7780(2)    | 7579(5)  | 645.0(9)   | 32.0(5)         |
| C1B  | 8386(2)    | 7658(5)  | 1280.8(9)  | 31.5(5)         |
| C16B | 7945(2)    | 5574(6)  | 1608.1(10) | 36.4(6)         |
| C17B | 6617(2)    | 6368(6)  | 1742.3(10) | 40.2(6)         |
| C18B | 6725(2)    | 8976(7)  | 1760.7(11) | 43.3(6)         |
| F1B  | 6326.4(15) | 5556(6)  | 2235.9(6)  | 57.4(6)         |
| F2B  | 5544.0(14) | 5786(5)  | 1326.3(6)  | 47.3(5)         |
| O1B  | 7779.5(16) | 9617(4)  | 1524.7(7)  | 38.0(5)         |
| O2B  | 6008.5(18) | 10299(6) | 1945.2(10) | 61.4(7)         |
| C1   | 6609(3)    | 3246(6)  | 3740.9(12) | 28.5(7)         |
| C2   | 5077(3)    | 3536(7)  | 3608.1(16) | 30.6(8)         |
| C3   | 4496(3)    | 5350(8)  | 3276.7(17) | 36.3(9)         |
| C4   | 3104(4)    | 5512(9)  | 3101(2)    | 41.2(11)        |

**Fractional Atomic Coordinates ( $\times 10^4$ ) and Equivalent Isotropic Displacement Parameters ( $\text{\AA}^2 \times 10^3$ ) for 23DK001\_II.  $U_{\text{eq}}$  is defined as 1/3 of of the trace of the orthogonalised  $U_{\text{ij}}$  tensor.**

| Atom | <i>x</i>   | <i>y</i>  | <i>z</i>   | $U(\text{eq})$ |
|------|------------|-----------|------------|----------------|
| C5   | 2275(4)    | 3815(9)   | 3245(3)    | 43.1(12)       |
| C6   | 2836(4)    | 1977(9)   | 3572(2)    | 40.4(12)       |
| C7   | 4238(4)    | 1822(7)   | 3774.5(18) | 34.3(10)       |
| C8   | 4711(4)    | -125(8)   | 4136(2)    | 41.0(11)       |
| C9   | 5839(4)    | -371(8)   | 4529(2)    | 39.4(10)       |
| C10  | 6912(4)    | 1292(7)   | 4713.0(15) | 33.7(8)        |
| C11  | 7666(5)    | 1073(8)   | 5266.3(16) | 40.3(11)       |
| C12  | 8622(5)    | 2664(9)   | 5498.2(17) | 42.8(11)       |
| C13  | 8865(4)    | 4528(9)   | 5175.8(16) | 41.9(10)       |
| C14  | 8172(4)    | 4753(7)   | 4620.6(15) | 35.3(9)        |
| C15  | 7222(4)    | 3138(7)   | 4375.1(12) | 31.5(8)        |
| C16  | 7076(3)    | 1228(7)   | 3398.7(13) | 32.4(8)        |
| C17  | 8391(3)    | 2105(8)   | 3264.7(11) | 31.9(8)        |
| C18  | 8251(3)    | 4704(7)   | 3270.4(12) | 33.2(8)        |
| F1   | 8664(2)    | 1398(5)   | 2759.1(8)  | 42.3(8)        |
| F2   | 9479.1(19) | 1496(5)   | 3668.6(9)  | 42.4(8)        |
| O1   | 7187(2)    | 5270(5)   | 3509.0(11) | 32.2(6)        |
| O2   | 8951(2)    | 6092(6)   | 3094.2(12) | 45.4(8)        |
| C1A  | 6605(16)   | 2320(40)  | 3712(7)    | 31(3)          |
| C2A  | 5080(16)   | 2670(40)  | 3593(9)    | 27(3)          |
| C3A  | 4520(20)   | 4440(40)  | 3250(11)   | 36(5)          |
| C4A  | 3110(20)   | 4700(50)  | 3120(15)   | 39(5)          |
| C5A  | 2260(30)   | 3040(40)  | 3259(15)   | 31(4)          |
| C6A  | 2820(20)   | 1190(40)  | 3587(15)   | 35(5)          |
| C7A  | 4244(19)   | 1000(30)  | 3756(9)    | 25(4)          |
| C8A  | 4680(20)   | -860(40)  | 4142(12)   | 31(4)          |
| C9A  | 5830(20)   | -1200(40) | 4519(10)   | 28(4)          |

**Fractional Atomic Coordinates ( $\times 10^4$ ) and Equivalent Isotropic Displacement Parameters ( $\text{\AA}^2 \times 10^3$ ) for 23DK001\_11.  $U_{\text{eq}}$  is defined as 1/3 of the trace of the orthogonalised  $U_{\text{ij}}$  tensor.**

| Atom | x        | y        | z        | U(eq) |
|------|----------|----------|----------|-------|
| C10A | 6890(20) | 430(40)  | 4689(8)  | 28(4) |
| C11A | 7580(30) | 240(40)  | 5256(9)  | 35(5) |
| C12A | 8570(30) | 1760(40) | 5473(10) | 34(5) |
| C13A | 8860(30) | 3610(40) | 5164(10) | 37(5) |
| C14A | 8180(20) | 3860(40) | 4588(8)  | 29(4) |
| C15A | 7218(19) | 2220(40) | 4360(7)  | 26(3) |
| C16A | 7036(17) | 170(40)  | 3396(7)  | 32(3) |
| C17A | 8366(16) | 930(50)  | 3258(7)  | 37(3) |
| C18A | 8267(16) | 3540(50) | 3229(8)  | 37(3) |
| F1A  | 8641(13) | 80(50)   | 2767(5)  | 47(4) |
| F2A  | 9427(13) | 310(40)  | 3675(6)  | 47(4) |
| O1A  | 7206(14) | 4270(40) | 3469(7)  | 36(3) |
| O2A  | 8991(15) | 4860(50) | 3043(8)  | 52(4) |

**Anisotropic Displacement Parameters ( $\text{\AA}^2 \times 10^3$ ) for 23DK001\_10. The Anisotropic displacement factor exponent takes the form:  $-2\pi^2[h^2a^2U_{11}+2hka*b*U_{12}+\dots]$ .**

| Atom | U <sub>11</sub> | U <sub>22</sub> | U <sub>33</sub> | U <sub>23</sub> | U <sub>13</sub> | U <sub>12</sub> |
|------|-----------------|-----------------|-----------------|-----------------|-----------------|-----------------|
| C2B  | 27.2(10)        | 42.0(15)        | 27.9(10)        | 4.2(9)          | 6.5(8)          | 1.7(9)          |
| C3B  | 31.4(11)        | 49.1(16)        | 30.8(11)        | -0.4(10)        | 3.5(9)          | -0.2(10)        |
| C4B  | 33.6(12)        | 56.8(18)        | 35.5(12)        | 2.7(11)         | 2.9(9)          | -7.4(11)        |
| C5B  | 26.5(11)        | 71(2)           | 37.0(12)        | 10.4(13)        | 5.1(9)          | -2.6(11)        |
| C6B  | 30.0(12)        | 58.1(18)        | 37.2(12)        | 9.5(12)         | 11.4(9)         | 8.1(11)         |
| C7B  | 29.7(11)        | 44.5(15)        | 30.5(11)        | 8.5(10)         | 10.4(9)         | 6.4(9)          |
| C8B  | 37.9(12)        | 43.5(15)        | 41.4(12)        | 4.0(11)         | 17.9(10)        | 9.5(10)         |
| C9B  | 43.1(13)        | 38.5(15)        | 36.5(12)        | -2.2(10)        | 15.3(10)        | 2.5(10)         |
| C10B | 32.4(11)        | 41.2(15)        | 30.9(11)        | -1.8(9)         | 10.3(9)         | -2.3(9)         |
| C11B | 42.7(13)        | 48.0(16)        | 31.0(11)        | -4.9(10)        | 12.0(10)        | -7.2(11)        |



**Anisotropic Displacement Parameters ( $\text{\AA}^2 \times 10^3$ ) for 23DK001\_10. The Anisotropic displacement factor exponent takes the form:  $-2\pi^2[h^2a^*2U_{11}+2hka^*b^*U_{12}+\dots]$ .**

| Atom | U <sub>11</sub> | U <sub>22</sub> | U <sub>33</sub> | U <sub>23</sub> | U <sub>13</sub> | U <sub>12</sub> |
|------|-----------------|-----------------|-----------------|-----------------|-----------------|-----------------|
| C12B | 38.8(13)        | 61.4(19)        | 28.7(11)        | 0.1(11)         | 3.3(9)          | -12.3(12)       |
| C13B | 36.6(12)        | 53.8(17)        | 34.0(12)        | 5.8(11)         | 1.2(10)         | 0.6(11)         |
| C14B | 31.3(11)        | 42.7(15)        | 35.1(11)        | 0.3(10)         | 3.6(9)          | 1.7(10)         |
| C15B | 27.6(10)        | 40.9(14)        | 28.1(10)        | -0.8(9)         | 6.4(8)          | -0.9(9)         |
| C1B  | 27.2(10)        | 38.8(13)        | 29.2(10)        | -4.3(8)         | 7.0(8)          | 3.0(8)          |
| C16B | 30.2(10)        | 51.8(15)        | 28.6(10)        | 0.7(10)         | 9.2(8)          | 0.1(10)         |
| C17B | 25.2(10)        | 70.3(16)        | 25.4(10)        | -6.5(10)        | 5.7(8)          | -6.1(10)        |
| C18B | 22.9(10)        | 70.2(16)        | 35.7(11)        | -17.9(11)       | 2.4(8)          | 0.9(10)         |
| F1B  | 36.2(8)         | 108.5(16)       | 30.4(7)         | 1.5(8)          | 13.4(6)         | -7.7(9)         |
| F2B  | 30.0(7)         | 72.9(13)        | 36.8(7)         | -9.9(7)         | -0.1(6)         | -10.4(7)        |
| O1B  | 28.3(8)         | 49.3(12)        | 35.9(8)         | -12.0(7)        | 4.9(6)          | 4.9(7)          |
| O2B  | 30.3(9)         | 88.5(18)        | 66.6(13)        | -34.9(13)       | 11.7(9)         | 4.8(10)         |
| C1   | 25.6(12)        | 34(2)           | 26.9(12)        | 0.5(13)         | 7.3(10)         | -3.8(12)        |
| C2   | 26.6(12)        | 39(2)           | 27.2(14)        | -4.9(16)        | 8.4(10)         | -0.8(13)        |
| C3   | 31.0(14)        | 49(3)           | 28.2(14)        | 2.1(18)         | 4.0(10)         | 1.2(16)         |
| C4   | 32.5(15)        | 58(3)           | 32.5(17)        | 3(2)            | 3.5(12)         | 8.4(17)         |
| C5   | 25.2(14)        | 67(4)           | 37.2(19)        | -6(3)           | 4.6(12)         | 1.3(19)         |
| C6   | 29.4(14)        | 56(3)           | 38(2)           | -6(2)           | 12.5(13)        | -8.1(17)        |
| C7   | 29.4(14)        | 45(3)           | 30.8(15)        | -8.7(18)        | 11.2(11)        | -3.8(15)        |
| C8   | 38.5(17)        | 44(3)           | 45(2)           | -3(2)           | 19.1(13)        | -9.3(18)        |
| C9   | 44.1(18)        | 38(3)           | 39.9(17)        | 5.0(18)         | 17.5(13)        | 1.2(17)         |
| C10  | 32.7(15)        | 38(2)           | 32.8(15)        | 0.7(15)         | 11.7(11)        | 3.4(16)         |
| C11  | 42(2)           | 52(3)           | 29.5(14)        | 7.7(17)         | 11.9(13)        | 8(2)            |
| C12  | 39.1(18)        | 60(3)           | 27.4(15)        | -1.3(19)        | 2.2(12)         | 13(2)           |
| C13  | 35.7(17)        | 58(3)           | 30.5(14)        | -4.7(17)        | 1.6(11)         | 1(2)            |
| C14  | 31.3(15)        | 42(3)           | 31.3(14)        | -3.5(15)        | 3.3(11)         | -0.3(16)        |
| C15  | 29.1(15)        | 40(2)           | 25.6(12)        | 1.3(13)         | 7.3(10)         | 3.0(15)         |

**Anisotropic Displacement Parameters ( $\text{\AA}^2 \times 10^3$ ) for 23DK001\_10. The Anisotropic displacement factor exponent takes the form:  $-2\pi^2[h^2a^*2U_{11}+2hka^*b^*U_{12}+\dots]$ .**

| Atom | $U_{11}$ | $U_{22}$ | $U_{33}$ | $U_{23}$ | $U_{13}$ | $U_{12}$  |
|------|----------|----------|----------|----------|----------|-----------|
| C16  | 28.0(13) | 41(2)    | 29.6(14) | -0.8(14) | 8.9(10)  | -1.7(13)  |
| C17  | 24.7(12) | 48(2)    | 23.4(12) | 1.7(14)  | 5.3(9)   | 0.9(13)   |
| C18  | 22.9(13) | 48(2)    | 28.1(13) | 3.4(13)  | 2.8(10)  | -4.1(13)  |
| F1   | 36.8(10) | 62(2)    | 31.8(9)  | -1.6(10) | 15.7(7)  | -0.2(10)  |
| F2   | 26.7(9)  | 61(2)    | 37.6(9)  | 7.0(11)  | 0.6(7)   | 5.8(10)   |
| O1   | 28.4(10) | 38.1(17) | 30.9(10) | 4.0(11)  | 6.8(8)   | -4.2(10)  |
| O2   | 32.9(12) | 54(2)    | 50.6(13) | 8.1(14)  | 12.0(9)  | -10.9(12) |
| C1A  | 32(4)    | 33(6)    | 28(4)    | -1(4)    | 3(3)     | -2(4)     |
| C2A  | 32(4)    | 27(6)    | 21(6)    | -5(5)    | 1(3)     | -3(4)     |
| C3A  | 33(5)    | 37(8)    | 36(8)    | 7(7)     | 6(5)     | 0(5)      |
| C4A  | 33(5)    | 40(9)    | 44(10)   | 8(8)     | 5(5)     | 2(5)      |
| C5A  | 33(5)    | 36(8)    | 26(8)    | -3(6)    | 9(5)     | 2(5)      |
| C6A  | 33(4)    | 36(9)    | 33(8)    | 0(7)     | 4(5)     | -2(5)     |
| C7A  | 33(4)    | 23(7)    | 19(6)    | -9(5)    | 5(4)     | -3(4)     |
| C8A  | 33(5)    | 32(8)    | 29(6)    | 0(6)     | 9(4)     | -1(5)     |
| C9A  | 31(5)    | 30(7)    | 26(6)    | 2(6)     | 12(4)    | 0(5)      |
| C10A | 30(6)    | 30(7)    | 27(4)    | -2(4)    | 11(4)    | 2(5)      |
| C11A | 36(7)    | 39(9)    | 30(5)    | 2(5)     | 7(4)     | -3(7)     |
| C12A | 32(7)    | 36(8)    | 33(6)    | -2(5)    | 5(5)     | 2(6)      |
| C13A | 37(8)    | 38(8)    | 34(5)    | -3(6)    | -1(4)    | -6(7)     |
| C14A | 25(6)    | 31(7)    | 32(5)    | -3(5)    | 4(4)     | 0(6)      |
| C15A | 21(5)    | 30(6)    | 28(4)    | -2(4)    | 6(3)     | 1(5)      |
| C16A | 35(4)    | 39(6)    | 23(5)    | 0(5)     | 7(4)     | 1(4)      |
| C17A | 33(4)    | 48(6)    | 30(4)    | 6(4)     | 7(3)     | 3(4)      |
| C18A | 25(5)    | 48(6)    | 35(7)    | 8(5)     | 0(4)     | -1(4)     |
| F1A  | 41(5)    | 69(9)    | 34(4)    | 2(5)     | 12(3)    | 8(6)      |
| F2A  | 40(4)    | 55(9)    | 42(4)    | 6(6)     | -1(4)    | 8(5)      |

**Anisotropic Displacement Parameters ( $\text{\AA}^2 \times 10^3$ ) for 23DK001\_10. The Anisotropic displacement factor exponent takes the form:  $-2\pi^2[h^2a^*^2U_{11}+2hka^*b^*U_{12}+\dots]$ .**

| Atom | $U_{11}$ | $U_{22}$ | $U_{33}$ | $U_{23}$ | $U_{13}$ | $U_{12}$ |
|------|----------|----------|----------|----------|----------|----------|
| O1A  | 29(4)    | 40(6)    | 36(5)    | 8(5)     | 2(4)     | 0(4)     |
| O2A  | 36(6)    | 56(8)    | 65(9)    | 18(8)    | 12(6)    | -3(6)    |

**Bond Lengths for 23DK001\_11.**

| Atom Atom | Length/ $\text{\AA}$ | Atom Atom | Length/ $\text{\AA}$ |
|-----------|----------------------|-----------|----------------------|
| C2B C3B   | 1.390(4)             | C10 C11   | 1.403(4)             |
| C2B C7B   | 1.408(3)             | C10 C15   | 1.415(4)             |
| C2B C1B   | 1.522(3)             | C11 C12   | 1.378(6)             |
| C3B C4B   | 1.390(3)             | C12 C13   | 1.380(6)             |
| C4B C5B   | 1.381(4)             | C13 C14   | 1.386(4)             |
| C5B C6B   | 1.386(4)             | C14 C15   | 1.393(5)             |
| C6B C7B   | 1.407(3)             | C16 C17   | 1.506(4)             |
| C7B C8B   | 1.460(4)             | C17 C18   | 1.524(5)             |
| C8B C9B   | 1.337(4)             | C17 F1    | 1.351(3)             |
| C9B C10B  | 1.464(3)             | C17 F2    | 1.367(3)             |
| C10B C11B | 1.401(3)             | C18 O1    | 1.342(3)             |
| C10B C15B | 1.408(3)             | C18 O2    | 1.199(4)             |
| C11B C12B | 1.380(4)             | C1A C2A   | 1.521(18)            |
| C12B C13B | 1.379(4)             | C1A C15A  | 1.557(18)            |
| C13B C14B | 1.393(3)             | C1A C16A  | 1.57(2)              |
| C14B C15B | 1.397(3)             | C1A O1A   | 1.456(18)            |
| C15B C1B  | 1.529(3)             | C2A C3A   | 1.38(2)              |
| C1B C16B  | 1.554(4)             | C2A C7A   | 1.386(19)            |
| C1B O1B   | 1.466(3)             | C3A C4A   | 1.40(2)              |
| C16B C17B | 1.502(3)             | C4A C5A   | 1.37(2)              |
| C17B C18B | 1.526(5)             | C5A C6A   | 1.40(2)              |

**Bond Lengths for 23DK001\_11.**

| Atom Atom | Length/Å | Atom Atom | Length/Å  |
|-----------|----------|-----------|-----------|
| C17B F1B  | 1.351(3) | C6A C7A   | 1.41(2)   |
| C17B F2B  | 1.369(3) | C7A C8A   | 1.44(2)   |
| C18B O1B  | 1.342(3) | C8A C9A   | 1.340(19) |
| C18B O2B  | 1.194(3) | C9A C10A  | 1.44(2)   |
| C1 C2     | 1.524(4) | C10A C11A | 1.406(19) |
| C1 C15    | 1.528(4) | C10A C15A | 1.384(19) |
| C1 C16    | 1.555(4) | C11A C12A | 1.37(2)   |
| C1 O1     | 1.470(3) | C12A C13A | 1.37(2)   |
| C2 C3     | 1.385(5) | C13A C14A | 1.43(2)   |
| C2 C7     | 1.412(4) | C14A C15A | 1.396(19) |
| C3 C4     | 1.389(4) | C16A C17A | 1.503(18) |
| C4 C5     | 1.378(6) | C17A C18A | 1.52(2)   |
| C5 C6     | 1.385(6) | C17A F1A  | 1.348(17) |
| C6 C7     | 1.407(4) | C17A F2A  | 1.370(17) |
| C7 C8     | 1.453(5) | C18A O1A  | 1.369(18) |
| C8 C9     | 1.341(5) | C18A O2A  | 1.200(19) |
| C9 C10    | 1.458(5) |           |           |

**Bond Angles for 23DK001\_11.**

| Atom Atom Atom | Angle/°  | Atom Atom Atom | Angle/°  |
|----------------|----------|----------------|----------|
| C3B C2B C7B    | 119.7(2) | C15 C10 C9     | 124.3(3) |
| C3B C2B C1B    | 120.2(2) | C12 C11 C10    | 122.2(4) |
| C7B C2B C1B    | 119.8(2) | C11 C12 C13    | 119.3(3) |
| C4B C3B C2B    | 121.0(2) | C12 C13 C14    | 119.9(4) |
| C5B C4B C3B    | 120.0(3) | C13 C14 C15    | 121.6(3) |
| C4B C5B C6B    | 119.5(2) | C10 C15 C1     | 120.3(3) |
| C5B C6B C7B    | 121.6(2) | C14 C15 C1     | 120.7(3) |

**Bond Angles for 23DK001\_11.**

| <b>Atom Atom Atom</b> | <b>Angle/°</b> | <b>Atom Atom Atom</b> | <b>Angle/°</b> |
|-----------------------|----------------|-----------------------|----------------|
| C2B C7B C8B           | 125.1(2)       | C14 C15 C10           | 118.8(3)       |
| C6B C7B C2B           | 118.1(2)       | C17 C16 C1            | 102.4(3)       |
| C6B C7B C8B           | 116.8(2)       | C16 C17 C18           | 104.5(3)       |
| C9B C8B C7B           | 129.6(2)       | F1 C17 C16            | 114.6(3)       |
| C8B C9B C10B          | 128.1(2)       | F1 C17 C18            | 110.3(3)       |
| C11B C10B C9B         | 117.1(2)       | F1 C17 F2             | 106.4(2)       |
| C11B C10B C15B        | 118.5(2)       | F2 C17 C16            | 112.5(3)       |
| C15B C10B C9B         | 124.4(2)       | F2 C17 C18            | 108.4(3)       |
| C12B C11B C10B        | 121.8(2)       | O1 C18 C17            | 109.3(3)       |
| C13B C12B C11B        | 119.5(2)       | O2 C18 C17            | 127.5(3)       |
| C12B C13B C14B        | 119.9(2)       | O2 C18 O1             | 123.2(4)       |
| C13B C14B C15B        | 121.0(2)       | C18 O1 C1             | 111.3(3)       |
| C10B C15B C1B         | 120.5(2)       | C2A C1A C15A          | 113.1(14)      |
| C14B C15B C10B        | 119.0(2)       | C2A C1A C16A          | 112.0(13)      |
| C14B C15B C1B         | 120.3(2)       | C15A C1A C16A         | 110.7(13)      |
| C2B C1B C15B          | 113.93(18)     | O1A C1A C2A           | 107.5(14)      |
| C2B C1B C16B          | 111.96(19)     | O1A C1A C15A          | 107.9(13)      |
| C15B C1B C16B         | 112.1(2)       | O1A C1A C16A          | 105.2(12)      |
| O1B C1B C2B           | 107.14(19)     | C3A C2A C1A           | 120.0(16)      |
| O1B C1B C15B          | 107.39(18)     | C3A C2A C7A           | 119.4(15)      |
| O1B C1B C16B          | 103.48(17)     | C7A C2A C1A           | 119.9(15)      |
| C17B C16B C1B         | 102.3(2)       | C2A C3A C4A           | 120.1(18)      |
| C16B C17B C18B        | 104.7(2)       | C5A C4A C3A           | 121(2)         |
| F1B C17B C16B         | 114.9(2)       | C4A C5A C6A           | 119(2)         |
| F1B C17B C18B         | 110.5(2)       | C5A C6A C7A           | 120(2)         |
| F1B C17B F2B          | 106.1(2)       | C2A C7A C6A           | 120.0(16)      |
| F2B C17B C16B         | 112.5(2)       | C2A C7A C8A           | 125.4(17)      |
| F2B C17B C18B         | 108.1(2)       | C6A C7A C8A           | 114.3(18)      |

**Bond Angles for 23DK001\_11.**

| Atom Atom Atom | Angle/°  | Atom Atom Atom | Angle/°   |
|----------------|----------|----------------|-----------|
| O1B C18B C17B  | 108.8(2) | C9A C8A C7A    | 132(2)    |
| O2B C18B C17B  | 127.7(3) | C8A C9A C10A   | 126.9(19) |
| O2B C18B O1B   | 123.5(3) | C11A C10A C9A  | 115.5(17) |
| C18B O1B C1B   | 111.6(2) | C15A C10A C9A  | 125.5(16) |
| C2 C1 C15      | 114.8(2) | C15A C10A C11A | 118.8(16) |
| C2 C1 C16      | 111.5(2) | C12A C11A C10A | 120.6(19) |
| C15 C1 C16     | 112.6(3) | C11A C12A C13A | 121.4(19) |
| O1 C1 C2       | 106.7(2) | C12A C13A C14A | 119.2(18) |
| O1 C1 C15      | 106.9(2) | C15A C14A C13A | 118.8(17) |
| O1 C1 C16      | 103.5(2) | C10A C15A C1A  | 120.1(14) |
| C3 C2 C1       | 120.5(3) | C10A C15A C14A | 120.9(15) |
| C3 C2 C7       | 119.4(3) | C14A C15A C1A  | 118.8(15) |
| C7 C2 C1       | 119.7(3) | C17A C16A C1A  | 101.7(13) |
| C2 C3 C4       | 121.3(3) | C16A C17A C18A | 104.7(13) |
| C5 C4 C3       | 119.9(4) | F1A C17A C16A  | 114.3(15) |
| C4 C5 C6       | 119.7(3) | F1A C17A C18A  | 110.8(15) |
| C5 C6 C7       | 121.5(3) | F1A C17A F2A   | 106.0(13) |
| C2 C7 C8       | 125.0(3) | F2A C17A C16A  | 111.5(14) |
| C6 C7 C2       | 118.1(3) | F2A C17A C18A  | 109.6(15) |
| C6 C7 C8       | 116.9(3) | O1A C18A C17A  | 109.9(13) |
| C9 C8 C7       | 129.9(4) | O2A C18A C17A  | 128.2(18) |
| C8 C9 C10      | 128.6(4) | O2A C18A O1A   | 122(2)    |
| C11 C10 C9     | 117.7(3) | C18A O1A C1A   | 109.6(14) |
| C11 C10 C15    | 117.9(3) |                |           |

**Torsion Angles for 23DK001\_11.**

| <b>A</b> | <b>B</b> | <b>C</b> | <b>D</b> | <b>Angle/°</b> | <b>A</b> | <b>B</b> | <b>C</b> | <b>D</b> | <b>Angle/°</b> |
|----------|----------|----------|----------|----------------|----------|----------|----------|----------|----------------|
| C2B      | C3B      | C4B      | C5B      | -2.5(4)        | C11      | C10      | C15      | C14      | -5.4(5)        |
| C2B      | C7B      | C8B      | C9B      | 25.7(4)        | C11      | C12      | C13      | C14      | -1.5(7)        |
| C2B      | C1B      | C16B     | C17B     | 144.72(19)     | C12      | C13      | C14      | C15      | 0.2(6)         |
| C2B      | C1B      | O1B      | C18B     | -140.96(19)    | C13      | C14      | C15      | C1       | -171.8(4)      |
| C3B      | C2B      | C7B      | C6B      | 1.8(3)         | C13      | C14      | C15      | C10      | 3.4(6)         |
| C3B      | C2B      | C7B      | C8B      | -177.9(2)      | C15      | C1       | C2       | C3       | 123.8(4)       |
| C3B      | C2B      | C1B      | C15B     | 123.2(2)       | C15      | C1       | C2       | C7       | -62.6(4)       |
| C3B      | C2B      | C1B      | C16B     | -108.2(3)      | C15      | C1       | C16      | C17      | -85.6(3)       |
| C3B      | C2B      | C1B      | O1B      | 4.6(3)         | C15      | C1       | O1       | C18      | 96.2(3)        |
| C3B      | C4B      | C5B      | C6B      | 1.5(4)         | C15      | C10      | C11      | C12      | 4.3(6)         |
| C4B      | C5B      | C6B      | C7B      | 1.2(4)         | C16      | C1       | C2       | C3       | -106.7(4)      |
| C5B      | C6B      | C7B      | C2B      | -2.8(4)        | C16      | C1       | C2       | C7       | 66.9(4)        |
| C5B      | C6B      | C7B      | C8B      | 177.0(2)       | C16      | C1       | C15      | C10      | -63.8(4)       |
| C6B      | C7B      | C8B      | C9B      | -154.1(3)      | C16      | C1       | C15      | C14      | 111.3(4)       |
| C7B      | C2B      | C3B      | C4B      | 0.7(4)         | C16      | C1       | O1       | C18      | -22.8(3)       |
| C7B      | C2B      | C1B      | C15B     | -63.1(3)       | C16      | C17      | C18      | O1       | 13.5(3)        |
| C7B      | C2B      | C1B      | C16B     | 65.5(3)        | C16      | C17      | C18      | O2       | -166.4(3)      |
| C7B      | C2B      | C1B      | O1B      | 178.29(19)     | C17      | C18      | O1       | C1       | 6.3(3)         |
| C7B      | C8B      | C9B      | C10B     | 1.7(4)         | F1       | C17      | C18      | O1       | 137.1(2)       |
| C8B      | C9B      | C10B     | C11B     | 152.2(3)       | F1       | C17      | C18      | O2       | -42.7(4)       |
| C8B      | C9B      | C10B     | C15B     | -25.8(4)       | F2       | C17      | C18      | O1       | -106.7(3)      |
| C9B      | C10B     | C11B     | C12B     | -174.3(2)      | F2       | C17      | C18      | O2       | 73.4(4)        |
| C9B      | C10B     | C15B     | C14B     | 172.8(2)       | O1       | C1       | C2       | C3       | 5.6(4)         |
| C9B      | C10B     | C15B     | C1B      | -11.7(3)       | O1       | C1       | C2       | C7       | 179.2(3)       |
| C10B     | C11B     | C12B     | C13B     | -0.3(4)        | O1       | C1       | C15      | C10      | -176.7(3)      |
| C10B     | C15B     | C1B      | C2B      | 66.0(3)        | O1       | C1       | C15      | C14      | -1.7(4)        |
| C10B     | C15B     | C1B      | C16B     | -62.5(3)       | O1       | C1       | C16      | C17      | 29.4(3)        |
| C10B     | C15B     | C1B      | O1B      | -175.5(2)      | O2       | C18      | O1       | C1       | -173.8(3)      |

**Torsion Angles for 23DK001\_11.**

| <b>A</b> | <b>B</b> | <b>C</b> | <b>D</b> | <b>Angle/°</b> | <b>A</b> | <b>B</b> | <b>C</b> | <b>D</b> | <b>Angle/°</b> |
|----------|----------|----------|----------|----------------|----------|----------|----------|----------|----------------|
| C11B     | C10B     | C15B     | C14B     | -5.2(3)        | C1A      | C2A      | C3A      | C4A      | 177(2)         |
| C11B     | C10B     | C15B     | C1B      | 170.3(2)       | C1A      | C2A      | C7A      | C6A      | -173(2)        |
| C11B     | C12B     | C13B     | C14B     | -1.8(4)        | C1A      | C2A      | C7A      | C8A      | 14(3)          |
| C12B     | C13B     | C14B     | C15B     | 0.2(4)         | C1A      | C16A     | C17A     | C18A     | -26.1(16)      |
| C13B     | C14B     | C15B     | C10B     | 3.3(4)         | C1A      | C16A     | C17A     | F1A      | -147.5(15)     |
| C13B     | C14B     | C15B     | C1B      | -172.2(2)      | C1A      | C16A     | C17A     | F2A      | 92.4(16)       |
| C14B     | C15B     | C1B      | C2B      | -118.6(2)      | C2A      | C1A      | C15A     | C10A     | 66(2)          |
| C14B     | C15B     | C1B      | C16B     | 112.9(3)       | C2A      | C1A      | C15A     | C14A     | -119.2(19)     |
| C14B     | C15B     | C1B      | O1B      | -0.1(3)        | C2A      | C1A      | C16A     | C17A     | 145.8(14)      |
| C15B     | C10B     | C11B     | C12B     | 3.8(4)         | C2A      | C1A      | O1A      | C18A     | -141.1(16)     |
| C15B     | C1B      | C16B     | C17B     | -85.8(2)       | C2A      | C3A      | C4A      | C5A      | -9(5)          |
| C15B     | C1B      | O1B      | C18B     | 96.3(2)        | C2A      | C7A      | C8A      | C9A      | 17(5)          |
| C1B      | C2B      | C3B      | C4B      | 174.5(2)       | C3A      | C2A      | C7A      | C6A      | -3(3)          |
| C1B      | C2B      | C7B      | C6B      | -171.9(2)      | C3A      | C2A      | C7A      | C8A      | -176(2)        |
| C1B      | C2B      | C7B      | C8B      | 8.3(3)         | C3A      | C4A      | C5A      | C6A      | 7(5)           |
| C1B      | C16B     | C17B     | C18B     | -26.6(2)       | C4A      | C5A      | C6A      | C7A      | -2(5)          |
| C1B      | C16B     | C17B     | F1B      | -148.0(2)      | C5A      | C6A      | C7A      | C2A      | 0(4)           |
| C1B      | C16B     | C17B     | F2B      | 90.5(3)        | C5A      | C6A      | C7A      | C8A      | 174(3)         |
| C16B     | C1B      | O1B      | C18B     | -22.5(2)       | C6A      | C7A      | C8A      | C9A      | -157(3)        |
| C16B     | C17B     | C18B     | O1B      | 14.4(3)        | C7A      | C2A      | C3A      | C4A      | 7(4)           |
| C16B     | C17B     | C18B     | O2B      | -166.2(3)      | C7A      | C8A      | C9A      | C10A     | 9(5)           |
| C17B     | C18B     | O1B      | C1B      | 5.6(3)         | C8A      | C9A      | C10A     | C11A     | 147(3)         |
| F1B      | C17B     | C18B     | O1B      | 138.60(19)     | C8A      | C9A      | C10A     | C15A     | -27(4)         |
| F1B      | C17B     | C18B     | O2B      | -42.0(4)       | C9A      | C10A     | C11A     | C12A     | -177(2)        |
| F2B      | C17B     | C18B     | O1B      | -105.7(2)      | C9A      | C10A     | C15A     | C1A      | -13(3)         |
| F2B      | C17B     | C18B     | O2B      | 73.7(3)        | C9A      | C10A     | C15A     | C14A     | 173(2)         |
| O1B      | C1B      | C16B     | C17B     | 29.7(2)        | C10A     | C11A     | C12A     | C13A     | 5(4)           |
| O2B      | C18B     | O1B      | C1B      | -173.9(2)      | C11A     | C10A     | C15A     | C1A      | 173(2)         |



**Torsion Angles for 23DK001\_11.**

| A   | B   | C   | D   | Angle/°   | A    | B    | C    | D    | Angle/°    |
|-----|-----|-----|-----|-----------|------|------|------|------|------------|
| C1  | C2  | C3  | C4  | 173.1(4)  | C11A | C10A | C15A | C14A | -2(3)      |
| C1  | C2  | C7  | C6  | -170.7(4) | C11A | C12A | C13A | C14A | -5(4)      |
| C1  | C2  | C7  | C8  | 8.5(6)    | C12A | C13A | C14A | C15A | 1(3)       |
| C1  | C16 | C17 | C18 | -25.9(3)  | C13A | C14A | C15A | C1A  | -173(2)    |
| C1  | C16 | C17 | F1  | -146.7(3) | C13A | C14A | C15A | C10A | 2(3)       |
| C1  | C16 | C17 | F2  | 91.5(3)   | C15A | C1A  | C2A  | C3A  | 126(2)     |
| C2  | C1  | C15 | C10 | 65.2(4)   | C15A | C1A  | C2A  | C7A  | -64(2)     |
| C2  | C1  | C15 | C14 | -119.7(4) | C15A | C1A  | C16A | C17A | -86.9(15)  |
| C2  | C1  | C16 | C17 | 143.7(3)  | C15A | C1A  | O1A  | C18A | 96.6(17)   |
| C2  | C1  | O1  | C18 | -140.5(3) | C15A | C10A | C11A | C12A | -2(4)      |
| C2  | C3  | C4  | C5  | -1.6(7)   | C16A | C1A  | C2A  | C3A  | -108(2)    |
| C2  | C7  | C8  | C9  | 25.3(8)   | C16A | C1A  | C2A  | C7A  | 62(2)      |
| C3  | C2  | C7  | C6  | 2.9(6)    | C16A | C1A  | C15A | C10A | -61(2)     |
| C3  | C2  | C7  | C8  | -177.9(4) | C16A | C1A  | C15A | C14A | 114.2(18)  |
| C3  | C4  | C5  | C6  | 1.1(8)    | C16A | C1A  | O1A  | C18A | -21.6(17)  |
| C4  | C5  | C6  | C7  | 1.5(8)    | C16A | C17A | C18A | O1A  | 15(2)      |
| C5  | C6  | C7  | C2  | -3.5(7)   | C16A | C17A | C18A | O2A  | -167(2)    |
| C5  | C6  | C7  | C8  | 177.3(5)  | C17A | C18A | O1A  | C1A  | 5(2)       |
| C6  | C7  | C8  | C9  | -155.6(6) | F1A  | C17A | C18A | O1A  | 138.5(15)  |
| C7  | C2  | C3  | C4  | -0.4(6)   | F1A  | C17A | C18A | O2A  | -43(3)     |
| C7  | C8  | C9  | C10 | 1.1(9)    | F2A  | C17A | C18A | O1A  | -104.9(16) |
| C8  | C9  | C10 | C11 | 153.7(5)  | F2A  | C17A | C18A | O2A  | 74(3)      |
| C8  | C9  | C10 | C15 | -24.8(7)  | O1A  | C1A  | C2A  | C3A  | 7(2)       |
| C9  | C10 | C11 | C12 | -174.4(4) | O1A  | C1A  | C2A  | C7A  | 177.0(17)  |
| C9  | C10 | C15 | C1  | -11.7(5)  | O1A  | C1A  | C15A | C10A | -175.3(16) |
| C9  | C10 | C15 | C14 | 173.1(4)  | O1A  | C1A  | C15A | C14A | 0(2)       |
| C10 | C11 | C12 | C13 | -0.8(7)   | O1A  | C1A  | C16A | C17A | 29.4(15)   |
| C11 | C10 | C15 | C1  | 169.7(4)  | O2A  | C18A | O1A  | C1A  | -173.8(18) |

**Hydrogen Atom Coordinates ( $\text{\AA}\times 10^4$ ) and Isotropic Displacement Parameters ( $\text{\AA}^2\times 10^3$ ) for 23DK001\_11.**

| Atom | <i>x</i> | <i>y</i> | <i>z</i> | U(eq) |
|------|----------|----------|----------|-------|
| H3B  | 9892.18  | 10951.83 | 1860.67  | 45    |
| H4B  | 12232.25 | 11369.06 | 2117.11  | 51    |
| H5B  | 13666.62 | 8559.15  | 1866.02  | 54    |
| H6B  | 12757.62 | 5421.37  | 1325.99  | 49    |
| H8B  | 10905.19 | 3095.69  | 918.89   | 47    |
| H9B  | 9073.43  | 2661.74  | 297.72   | 46    |
| H11B | 7539.16  | 4309.55  | -480.96  | 48    |
| H12B | 5924.89  | 6998.26  | -861.55  | 52    |
| H13B | 5502.63  | 10130.83 | -313.53  | 51    |
| H14B | 6640.5   | 10476.49 | 628.02   | 44    |
| H16A | 7829.5   | 4183.21  | 1366.79  | 44    |
| H16B | 8607.97  | 5256.39  | 1960.14  | 44    |
| H3   | 5061.76  | 6507.35  | 3167.25  | 44    |
| H4   | 2723.9   | 6789.81  | 2882.44  | 49    |
| H5   | 1323.43  | 3904.96  | 3120.27  | 52    |
| H6   | 2261.03  | 793.95   | 3662.29  | 48    |
| H8   | 4132.18  | -1423.38 | 4085.23  | 49    |
| H9   | 5954.02  | -1820.8  | 4711.68  | 47    |
| H11  | 7511.96  | -216.28  | 5488.67  | 48    |
| H12  | 9109.28  | 2480.62  | 5875.95  | 51    |
| H13  | 9506.91  | 5654.7   | 5334.12  | 50    |
| H14  | 8349.46  | 6040     | 4402.22  | 42    |
| H16C | 7215.36  | -186     | 3631.01  | 39    |
| H16D | 6411.99  | 919.09   | 3046.21  | 39    |
| H3A  | 5086.35  | 5490.93  | 3100.67  | 43    |
| H4A  | 2737.4   | 6050.76  | 2931.36  | 47    |

**Hydrogen Atom Coordinates ( $\text{\AA}\times 10^4$ ) and Isotropic Displacement Parameters ( $\text{\AA}^2\times 10^3$ ) for 23DK001\_11.**

| Atom | <i>x</i> | <i>y</i> | <i>z</i> | U(eq) |
|------|----------|----------|----------|-------|
| H5A  | 1313.18  | 3158.26  | 3134.11  | 37    |
| H6A  | 2252.42  | 44.52    | 3697.8   | 41    |
| H8A  | 4038.98  | -2065.9  | 4126.98  | 37    |
| H9A  | 5943.08  | -2666.96 | 4691.33  | 34    |
| H11A | 7351.84  | -958.82  | 5490.42  | 42    |
| H12A | 9077.04  | 1528.88  | 5846.11  | 41    |
| H13A | 9501.46  | 4722.31  | 5331.45  | 44    |
| H14A | 8369.38  | 5121.36  | 4364.28  | 35    |
| H16E | 7146.74  | -1196.68 | 3645.88  | 39    |
| H16F | 6371.27  | -174.54  | 3045.63  | 39    |

**Atomic Occupancy for 23DK001\_11.**

| Atom | Occupancy | Atom | Occupancy | Atom | Occupancy |
|------|-----------|------|-----------|------|-----------|
| C1   | 0.851(9)  | C2   | 0.851(9)  | C3   | 0.851(9)  |
| H3   | 0.851(9)  | C4   | 0.851(9)  | H4   | 0.851(9)  |
| C5   | 0.851(9)  | H5   | 0.851(9)  | C6   | 0.851(9)  |
| H6   | 0.851(9)  | C7   | 0.851(9)  | C8   | 0.851(9)  |
| H8   | 0.851(9)  | C9   | 0.851(9)  | H9   | 0.851(9)  |
| C10  | 0.851(9)  | C11  | 0.851(9)  | H11  | 0.851(9)  |
| C12  | 0.851(9)  | H12  | 0.851(9)  | C13  | 0.851(9)  |
| H13  | 0.851(9)  | C14  | 0.851(9)  | H14  | 0.851(9)  |
| C15  | 0.851(9)  | C16  | 0.851(9)  | H16C | 0.851(9)  |
| H16D | 0.851(9)  | C17  | 0.851(9)  | C18  | 0.851(9)  |
| F1   | 0.851(9)  | F2   | 0.851(9)  | O1   | 0.851(9)  |
| O2   | 0.851(9)  | C1A  | 0.149(9)  | C2A  | 0.149(9)  |
| C3A  | 0.149(9)  | H3A  | 0.149(9)  | C4A  | 0.149(9)  |

**Atomic Occupancy for 23DK001\_11.**

| <b>Atom</b> | <b>Occupancy</b> | <b>Atom</b> | <b>Occupancy</b> | <b>Atom</b> | <b>Occupancy</b> |
|-------------|------------------|-------------|------------------|-------------|------------------|
| H4A         | 0.149(9)         | C5A         | 0.149(9)         | H5A         | 0.149(9)         |
| C6A         | 0.149(9)         | H6A         | 0.149(9)         | C7A         | 0.149(9)         |
| C8A         | 0.149(9)         | H8A         | 0.149(9)         | C9A         | 0.149(9)         |
| H9A         | 0.149(9)         | C10A        | 0.149(9)         | C11A        | 0.149(9)         |
| H11A        | 0.149(9)         | C12A        | 0.149(9)         | H12A        | 0.149(9)         |
| C13A        | 0.149(9)         | H13A        | 0.149(9)         | C14A        | 0.149(9)         |
| H14A        | 0.149(9)         | C15A        | 0.149(9)         | C16A        | 0.149(9)         |
| H16E        | 0.149(9)         | H16F        | 0.149(9)         | C17A        | 0.149(9)         |
| C18A        | 0.149(9)         | F1A         | 0.149(9)         | F2A         | 0.149(9)         |
| O1A         | 0.149(9)         | O2A         | 0.149(9)         |             |                  |

## 12. NMR spectra of isolated compounds

$^1\text{H}$  NMR (500 MHz,  $\text{CDCl}_3$ ) of **4**

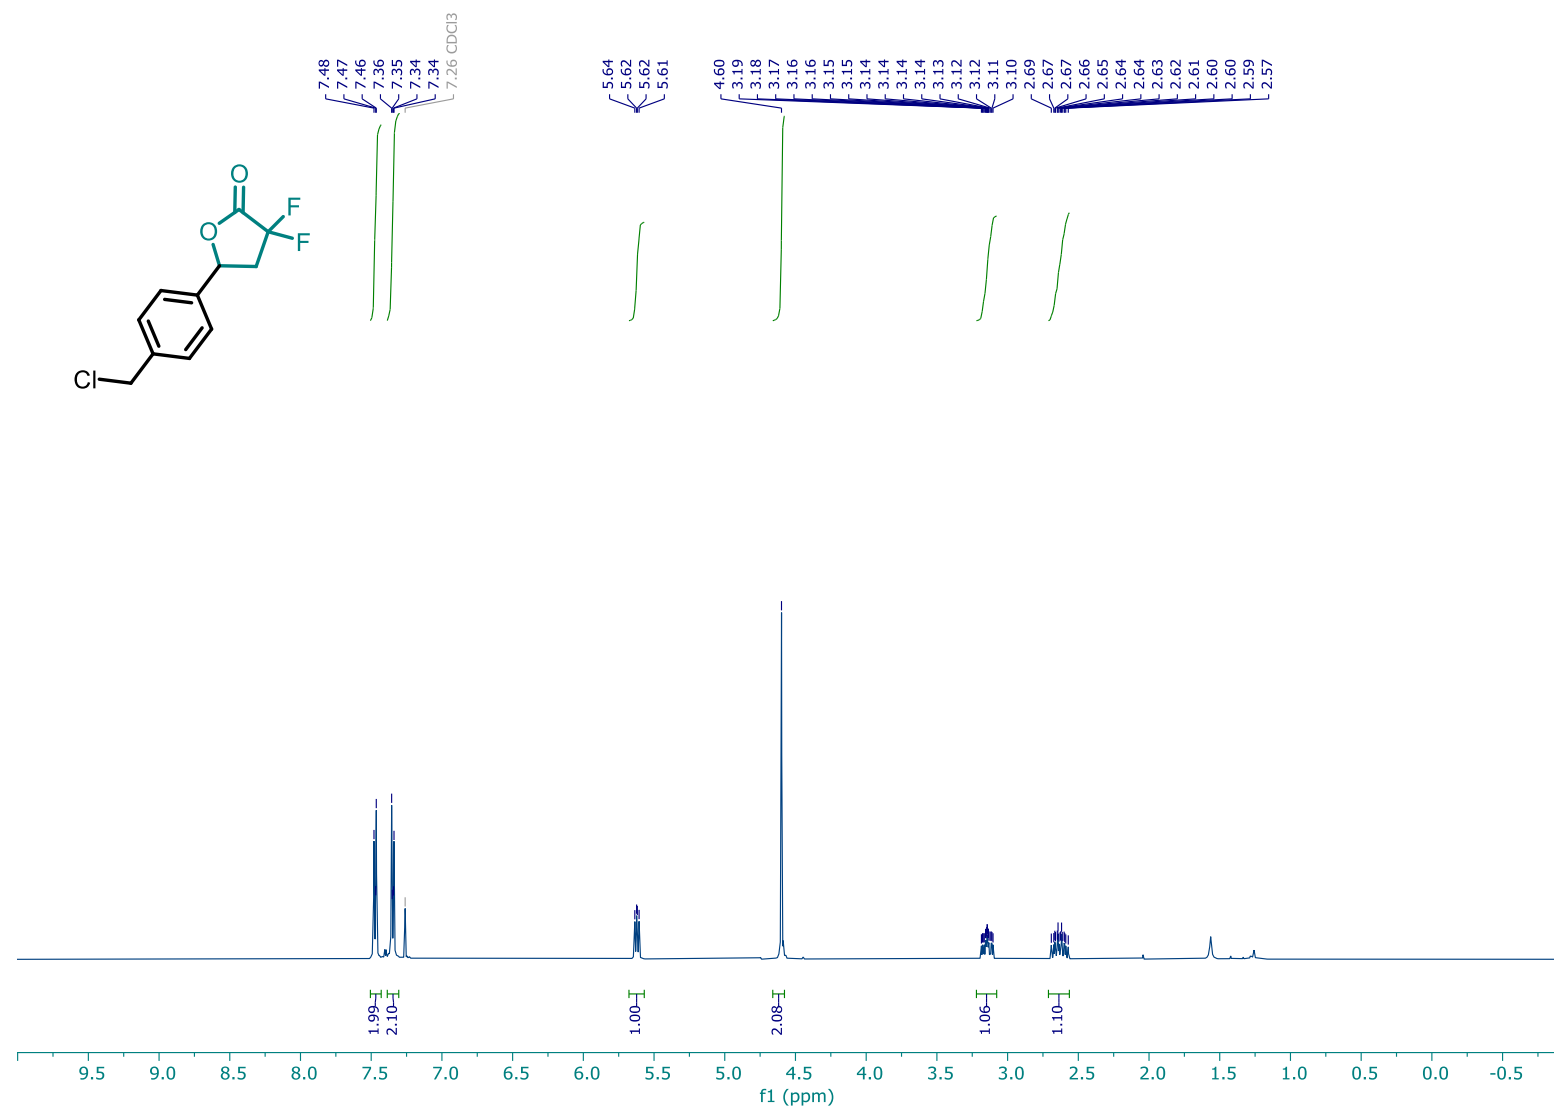

$^{13}\text{C}$  NMR (126 MHz,  $\text{CDCl}_3$ ) of **4**

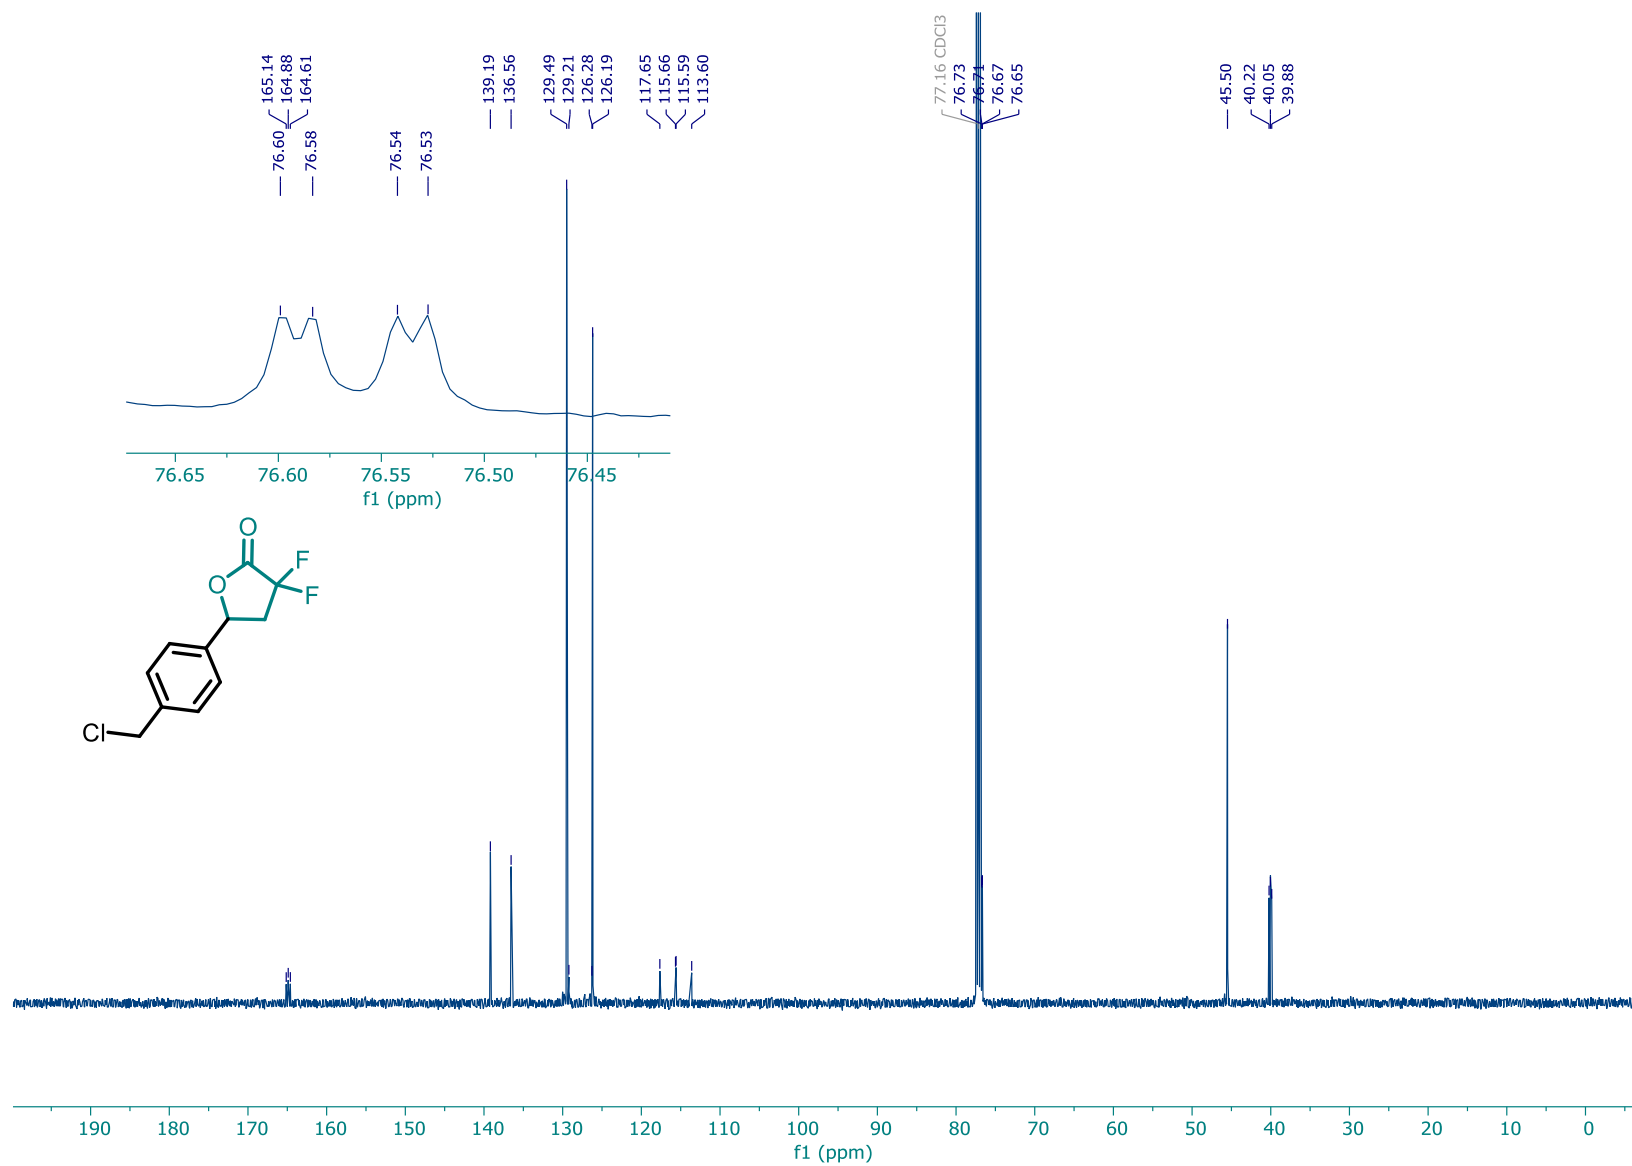

$^{19}\text{F}$  NMR (282 MHz,  $\text{CDCl}_3$ ) of **4**

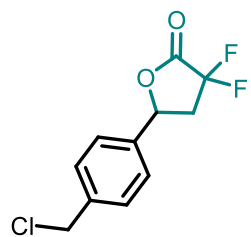

-105.97  
-106.96  
-108.59  
-109.58

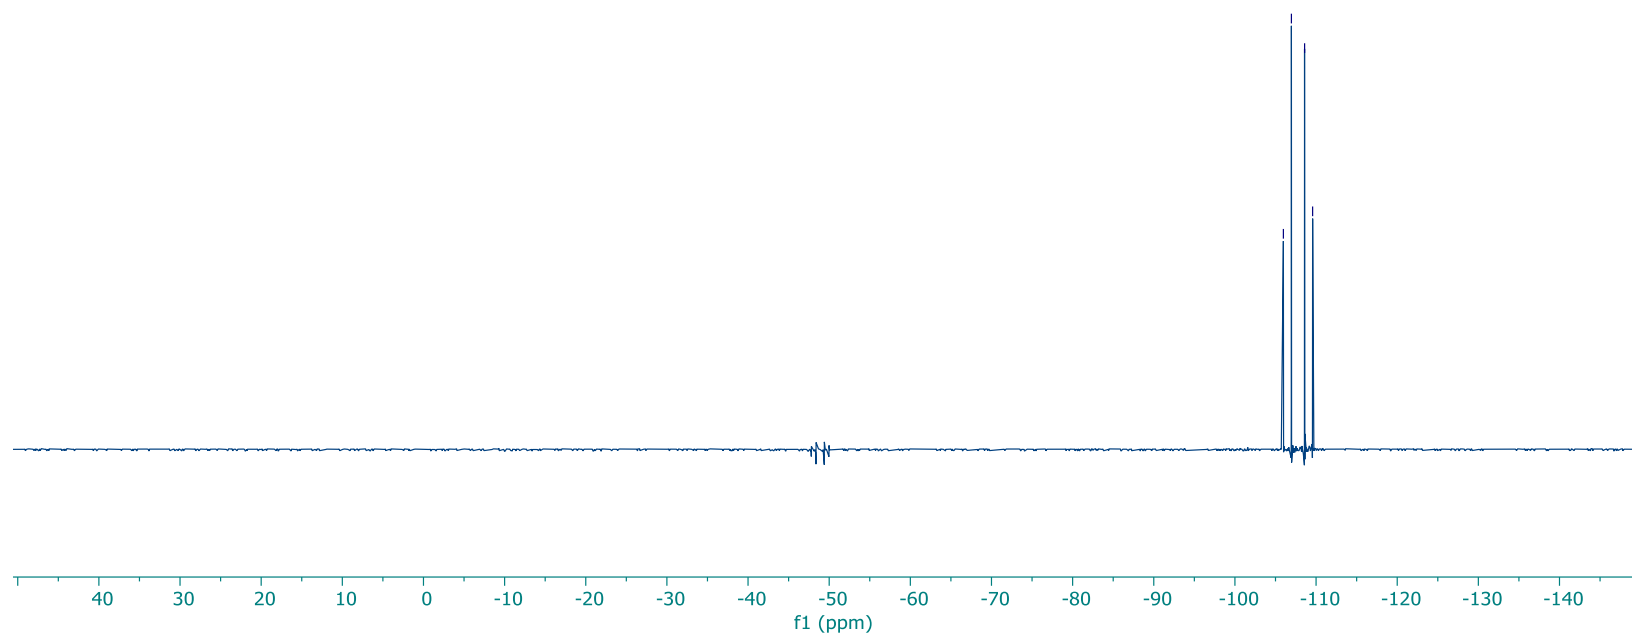

$^1\text{H}$  NMR (300 MHz,  $\text{CDCl}_3$ ) of **5**

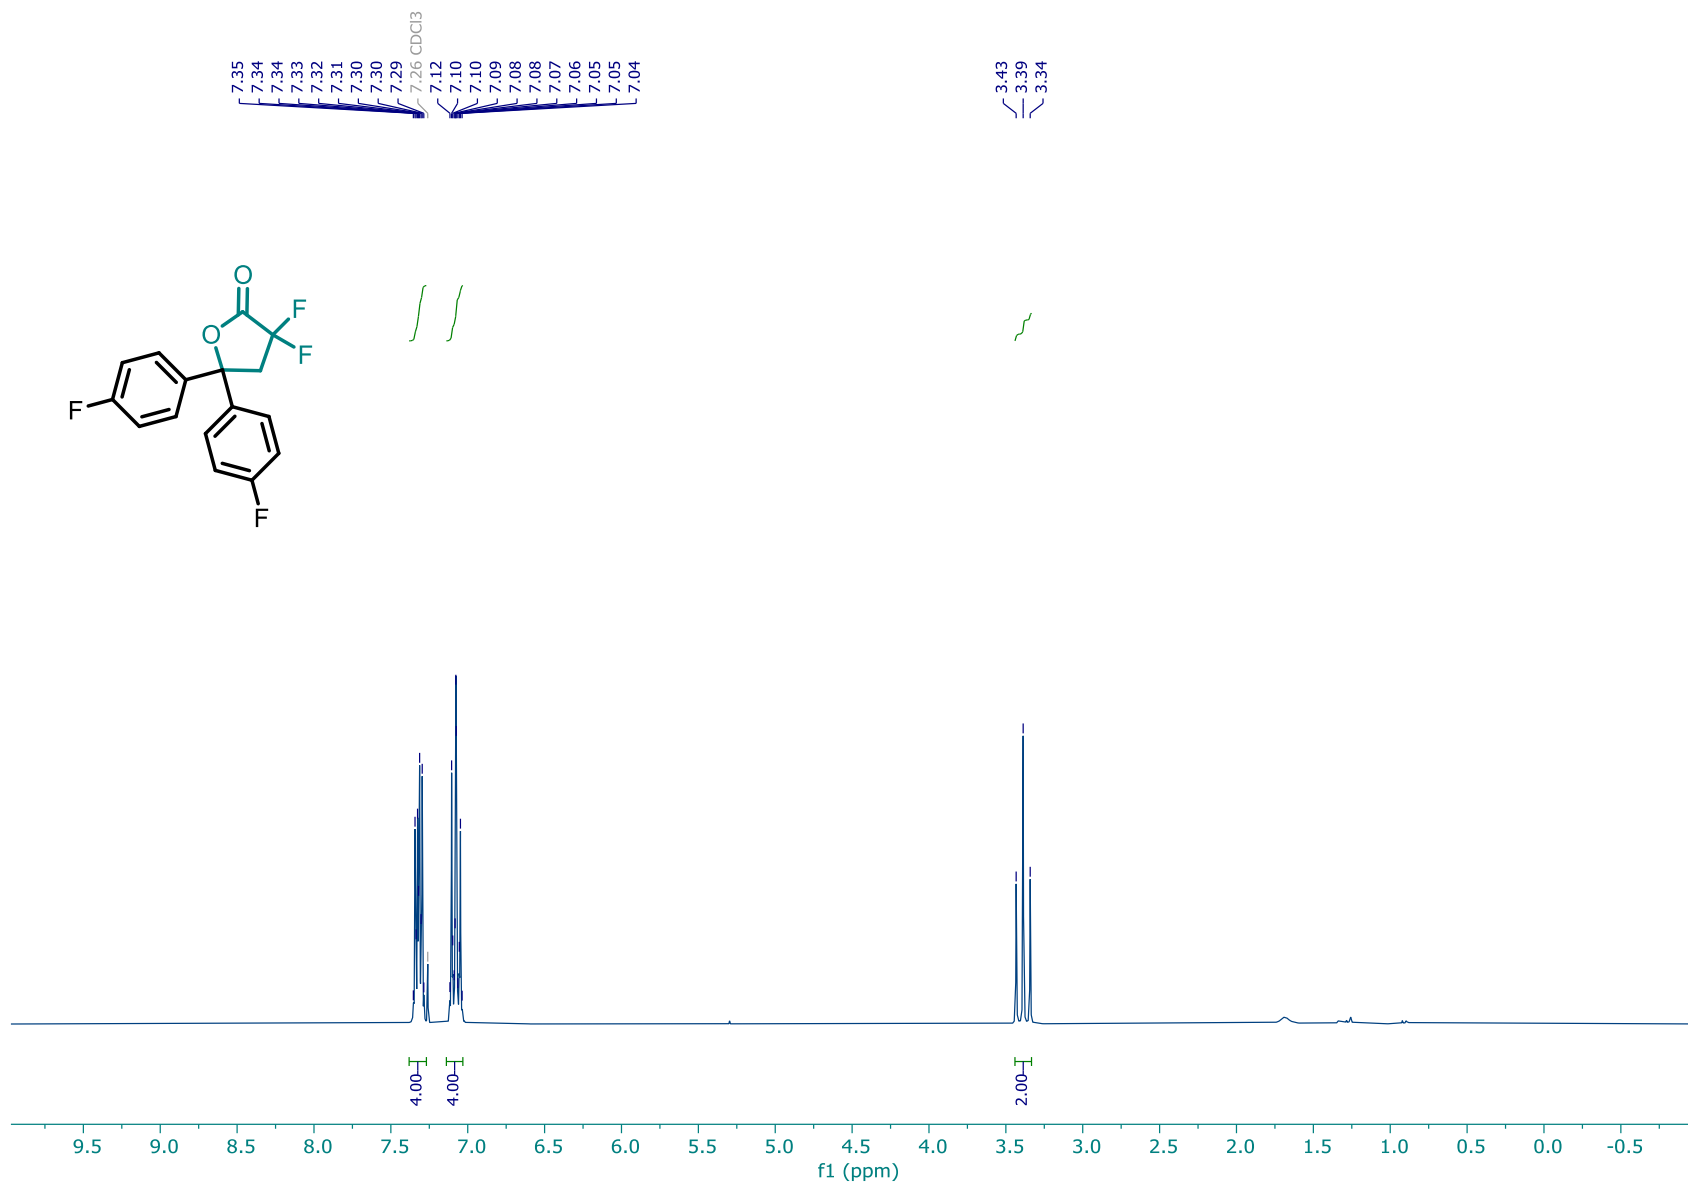



$^{13}\text{C}$  NMR (75 MHz,  $\text{CDCl}_3$ ) of **5**

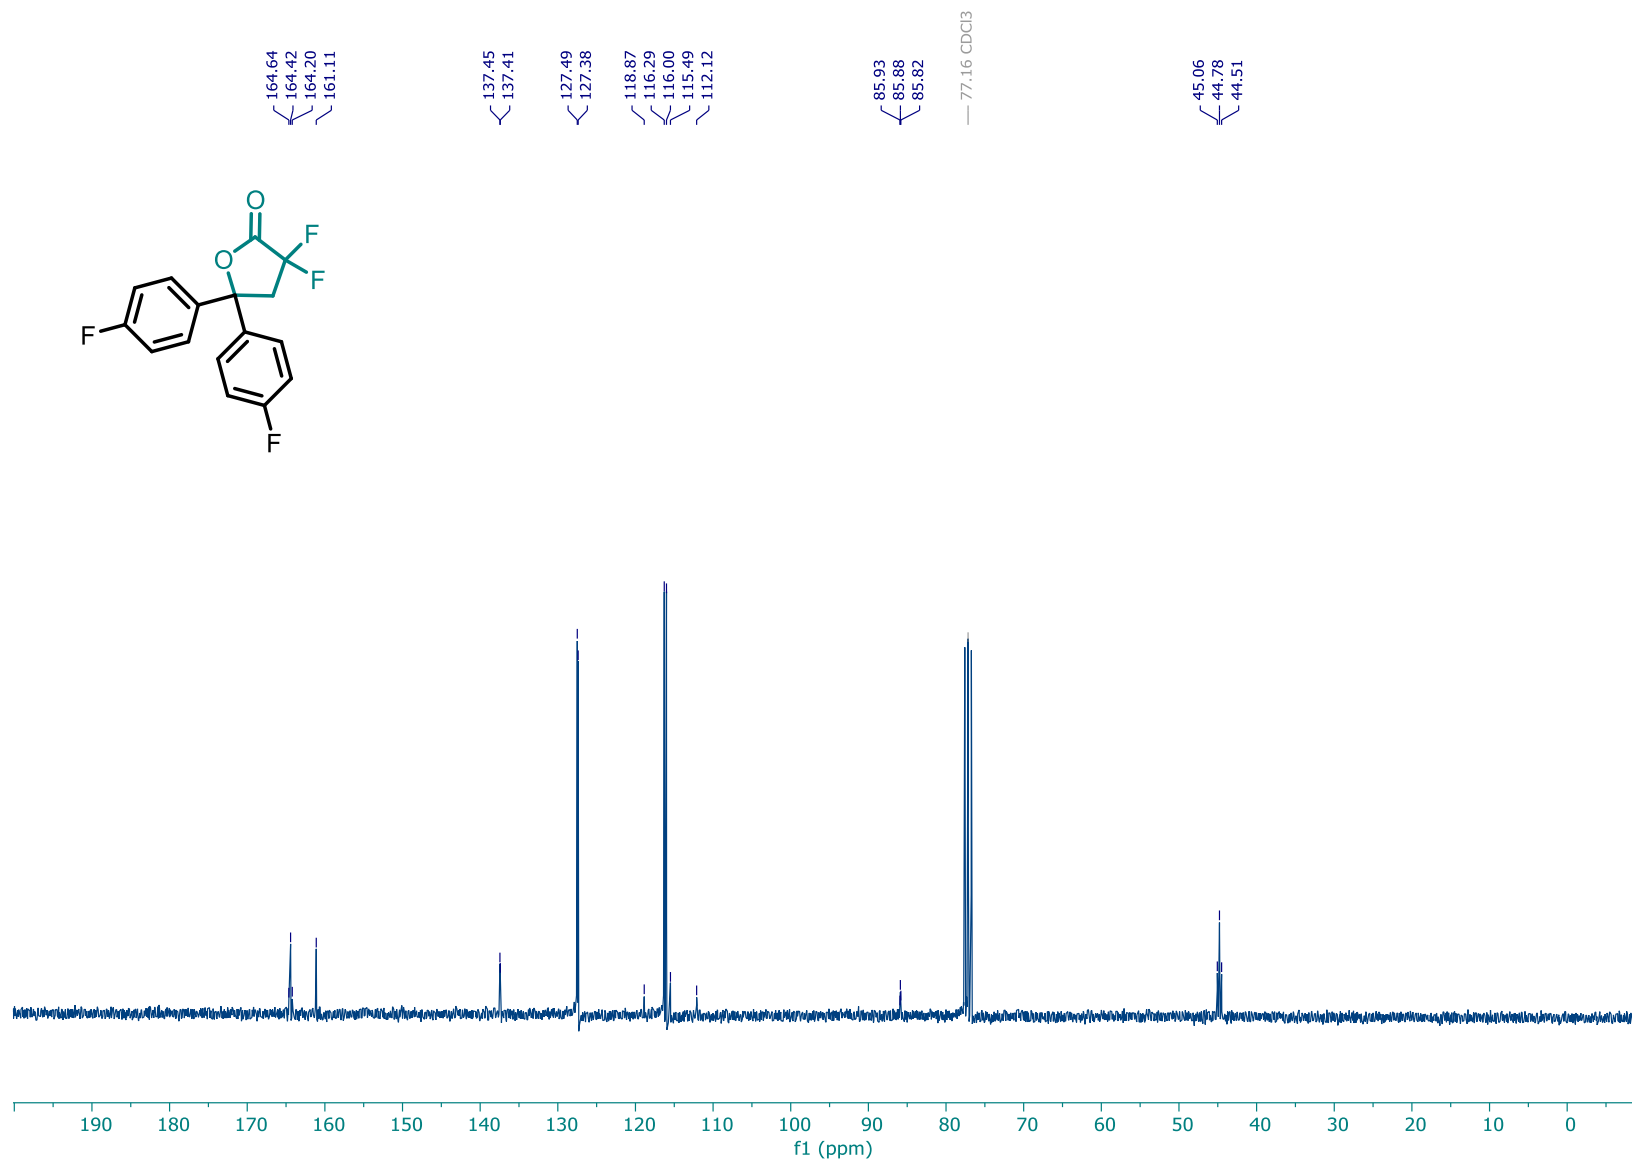

$^{19}\text{F}$  NMR (282 MHz,  $\text{CDCl}_3$ ) of **5**

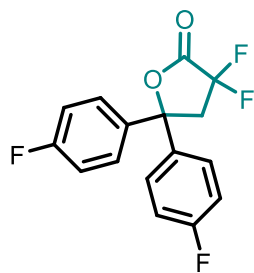

— -104.63

— -112.43

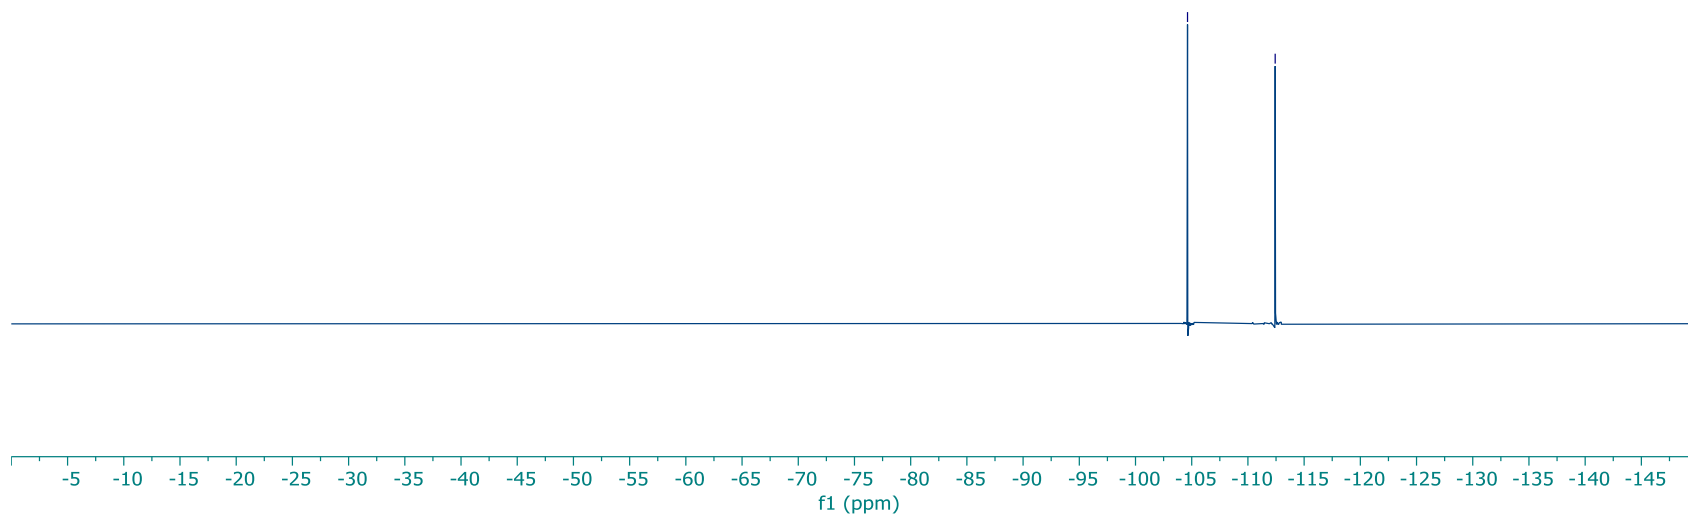

<sup>1</sup>H NMR (300 MHz, CDCl<sub>3</sub>) of **6**

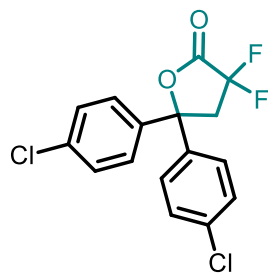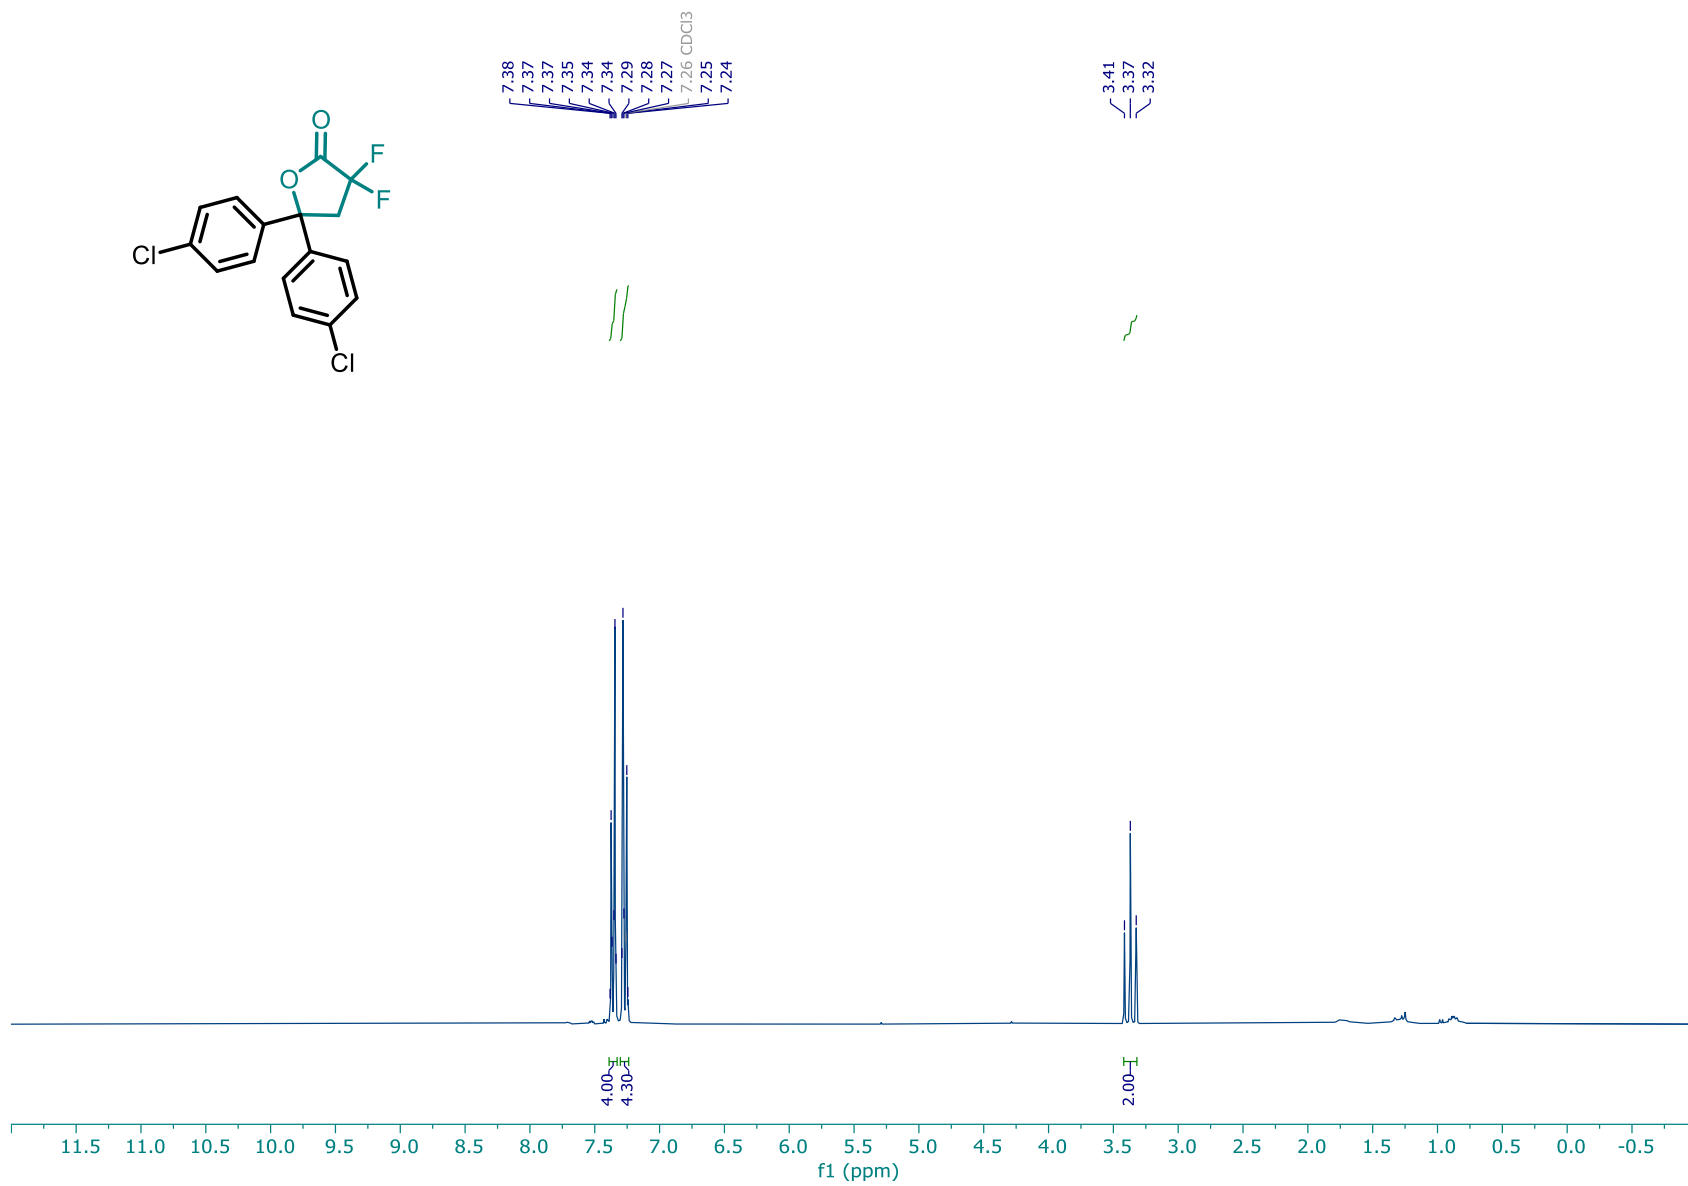

$^{13}\text{C}$  NMR (75 MHz,  $\text{CDCl}_3$ ) of **6**

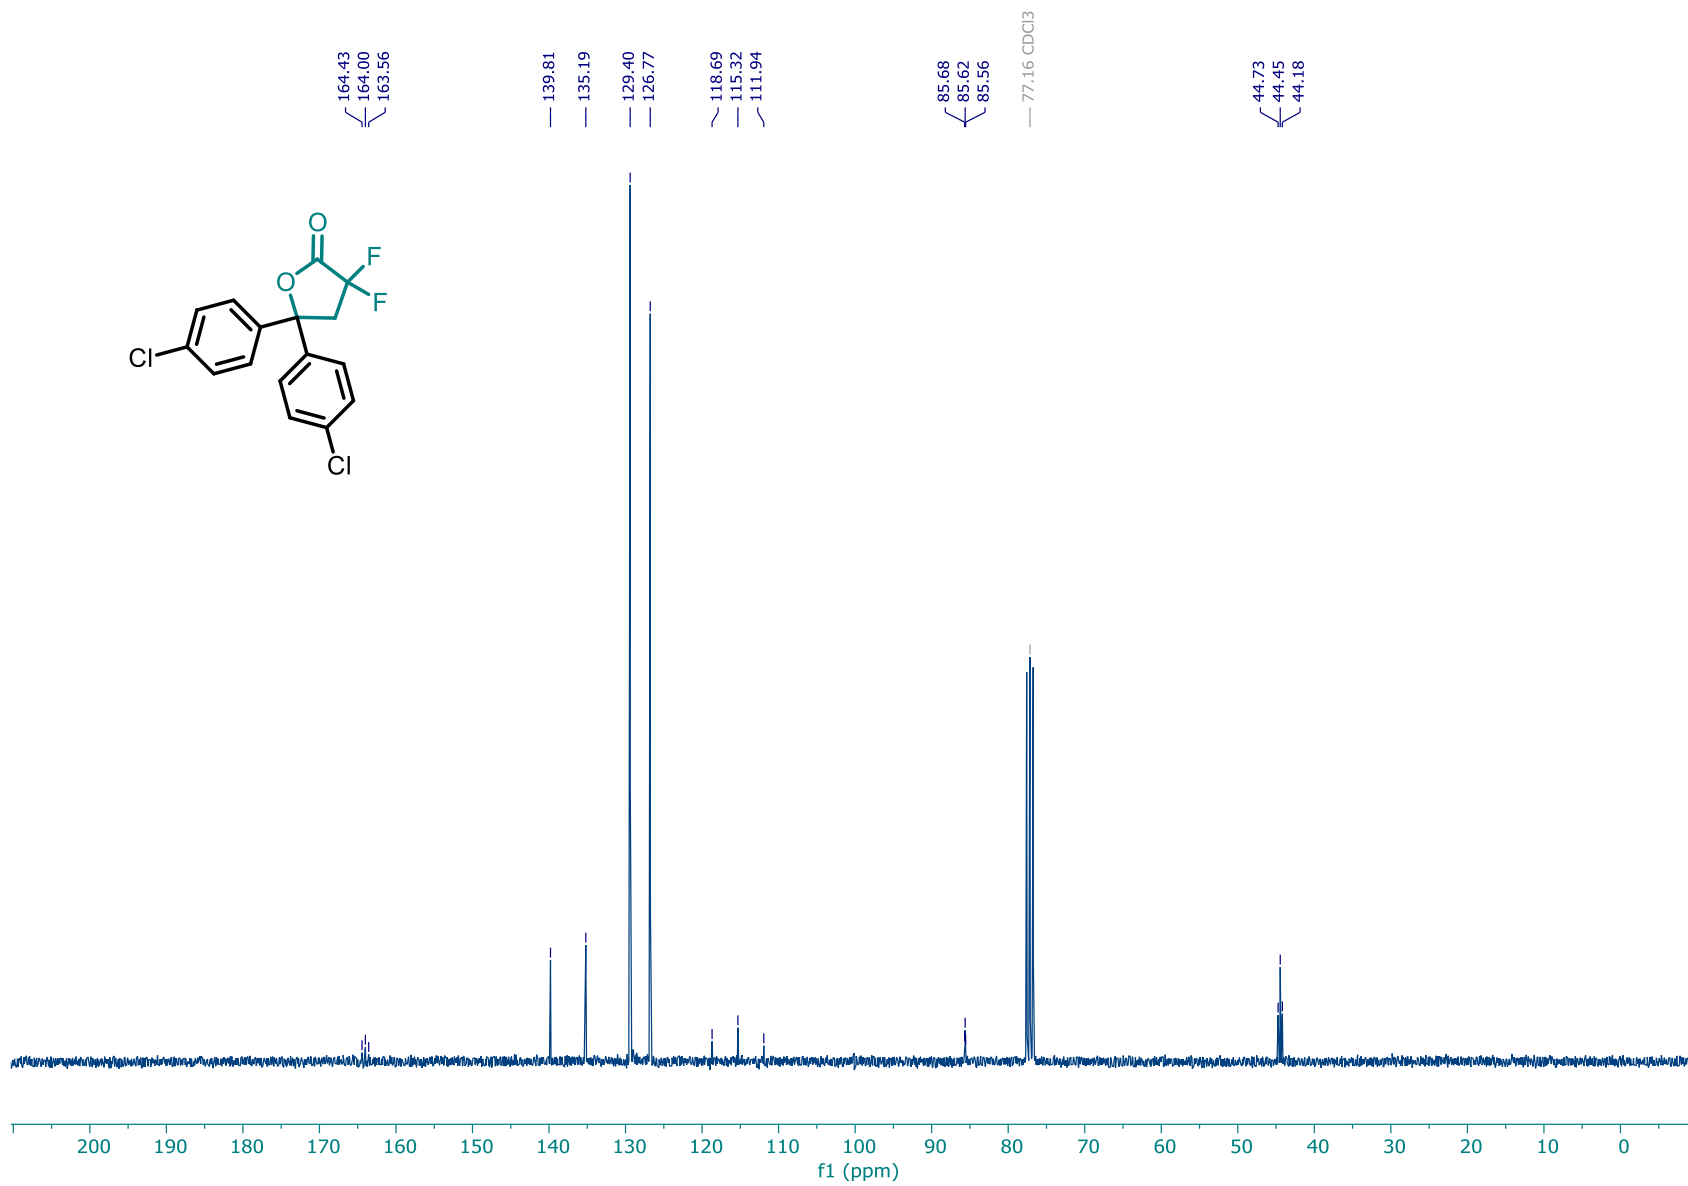

$^{19}\text{F}$  NMR (282 MHz,  $\text{CDCl}_3$ ) of **6**

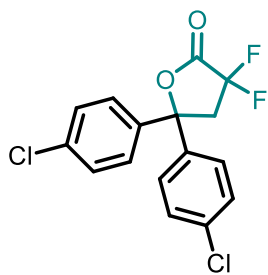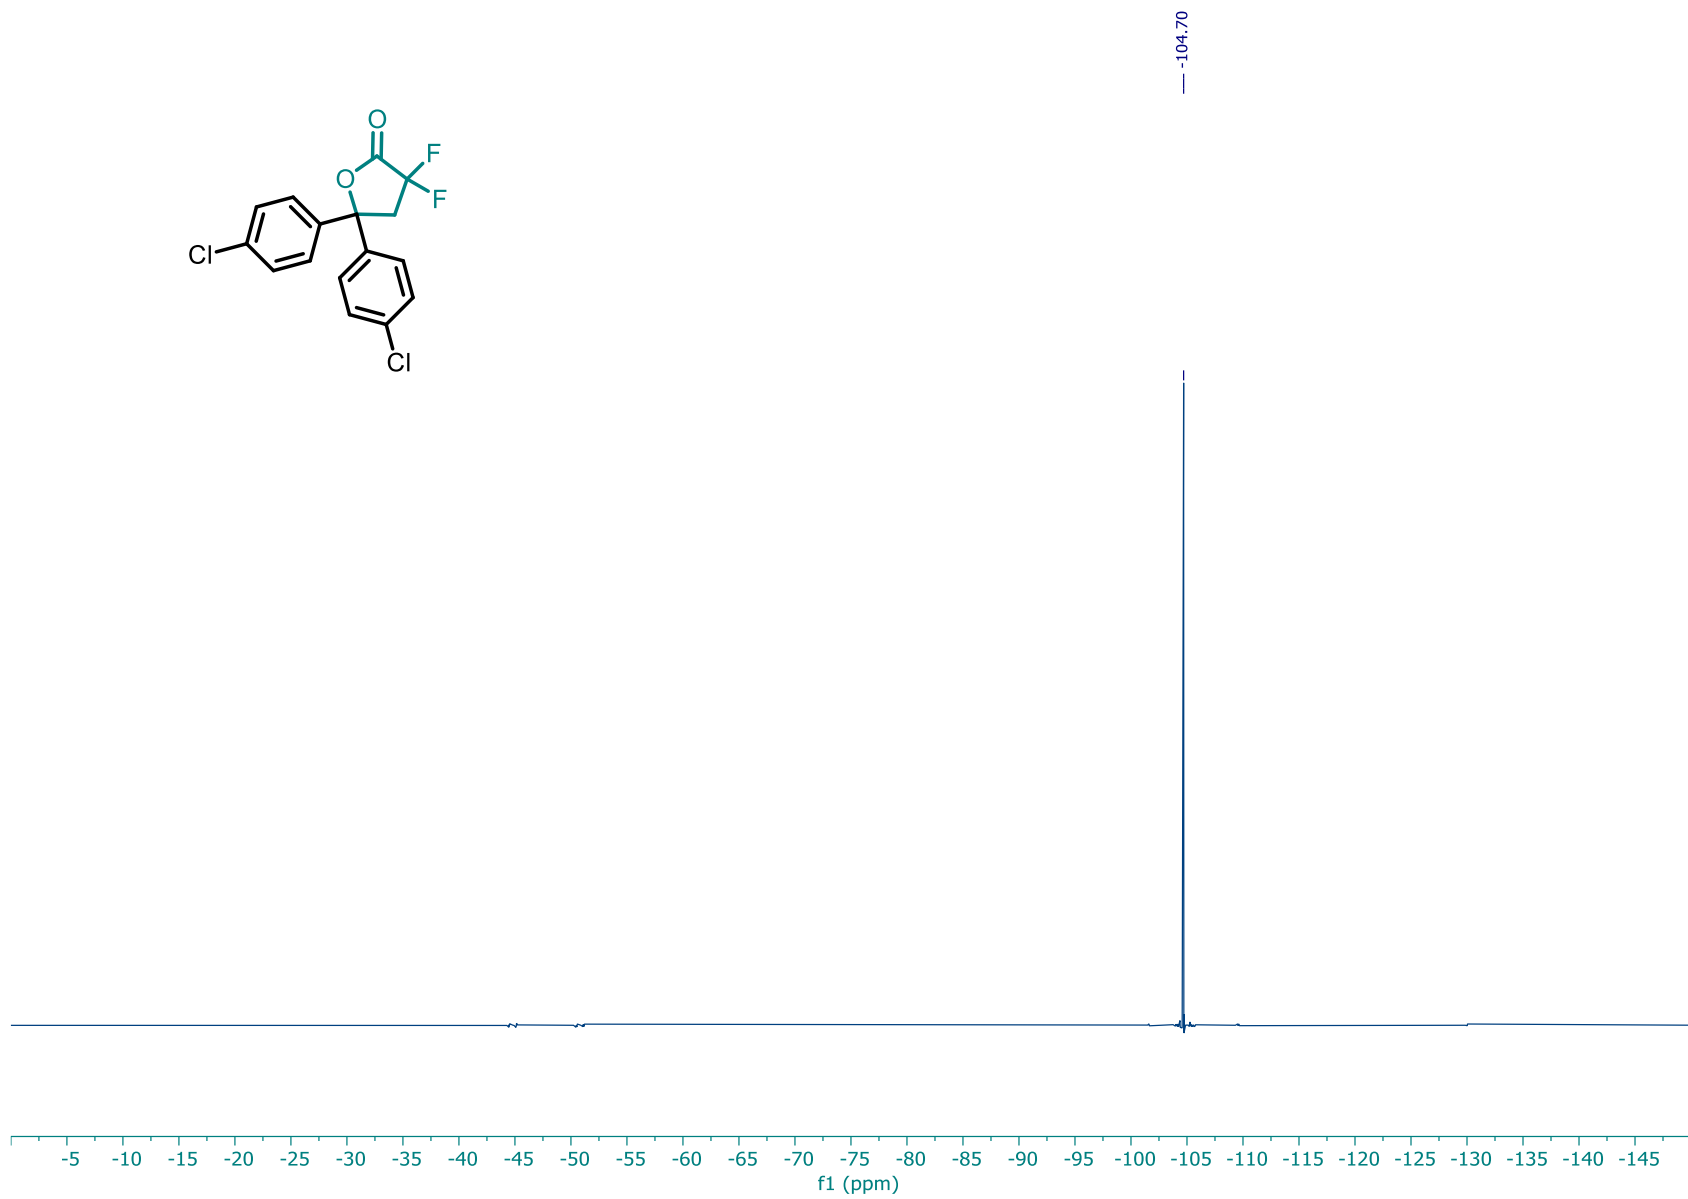

$^1\text{H}$  NMR (300 MHz,  $\text{CDCl}_3$ ) of 7

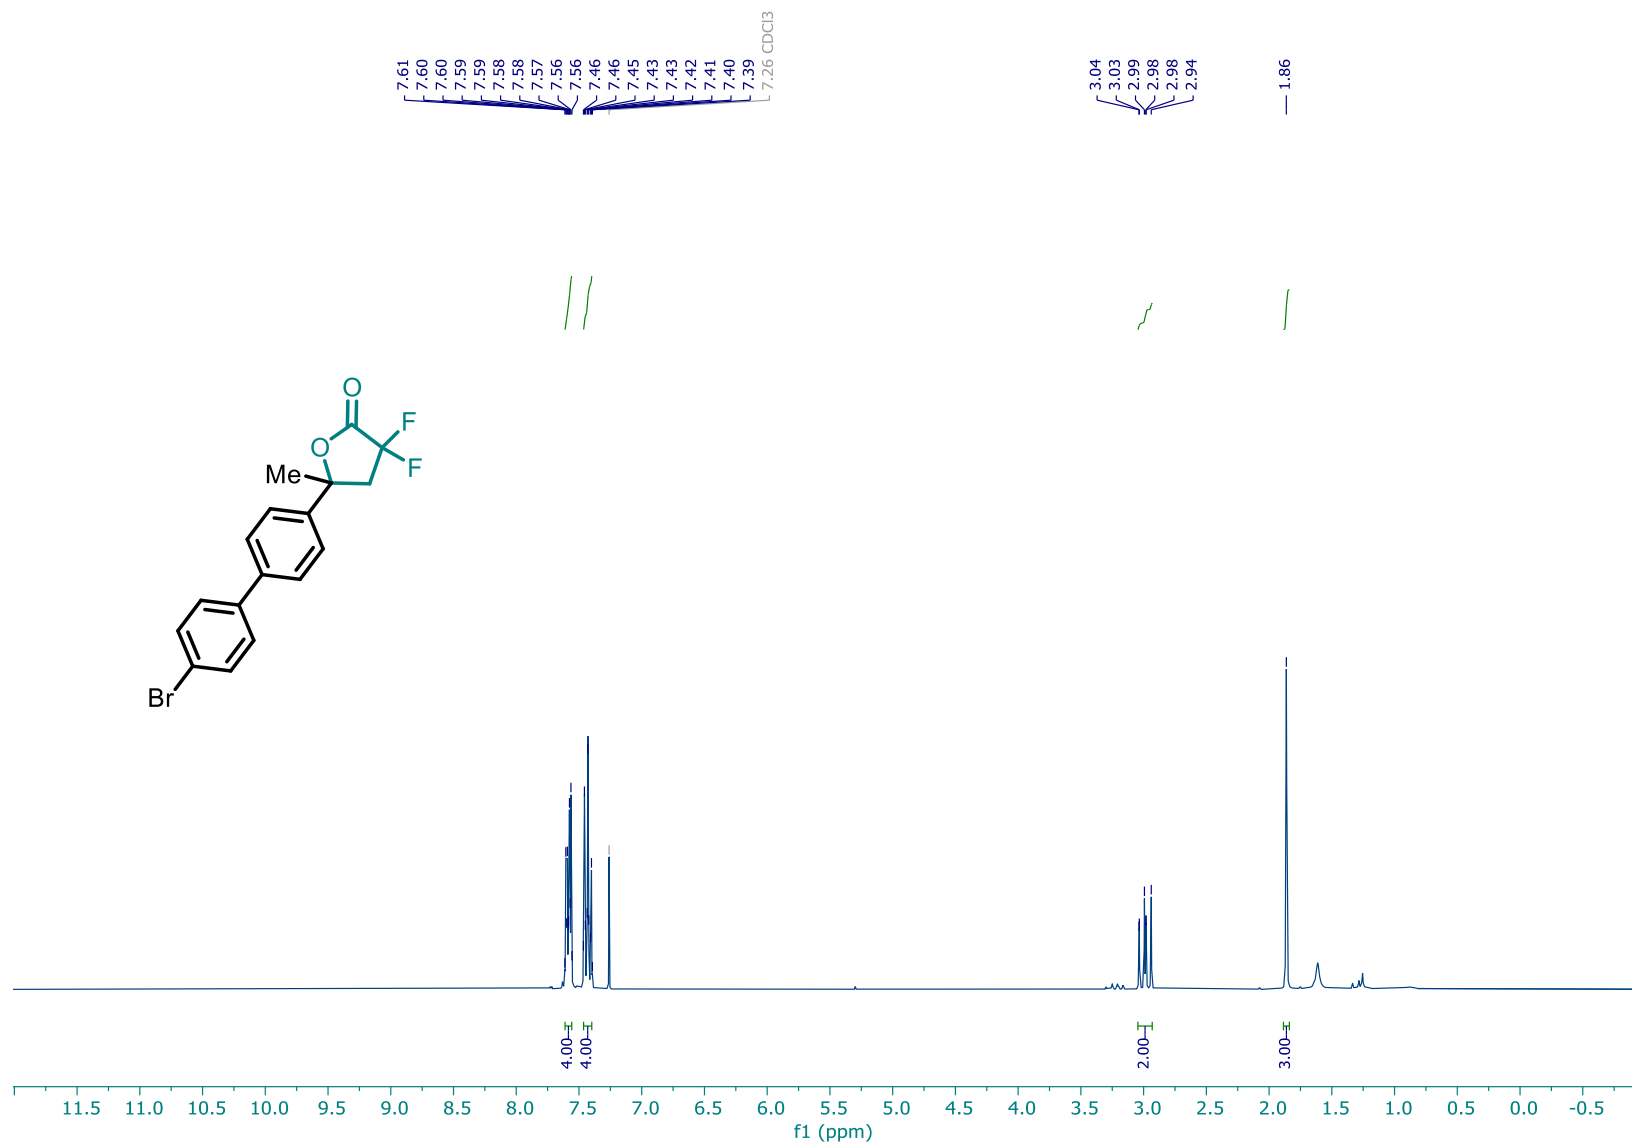

$^{13}\text{C}$  NMR (126MHz,  $\text{CDCl}_3$ ) of **7**

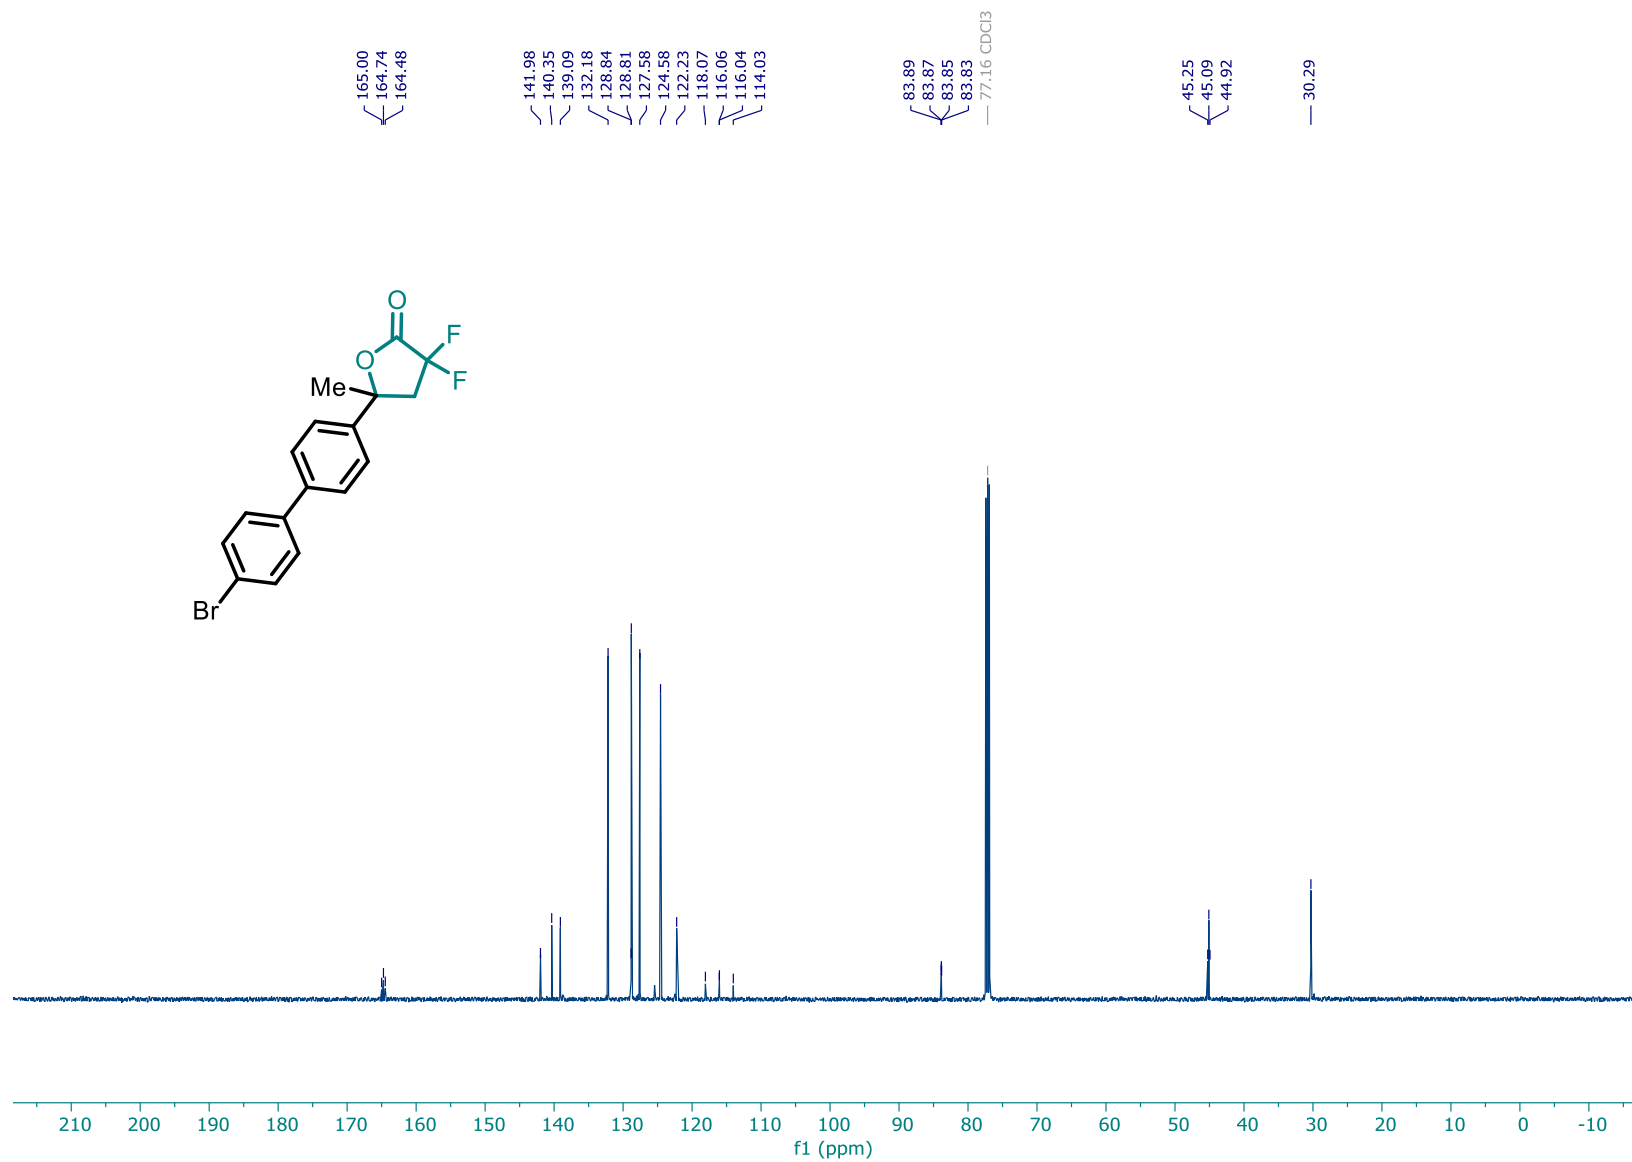

$^{19}\text{F}$  NMR (282 MHz,  $\text{CDCl}_3$ ) of **7**

-101.31  
-102.31  
-104.31  
-105.30

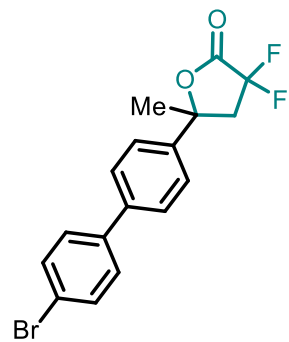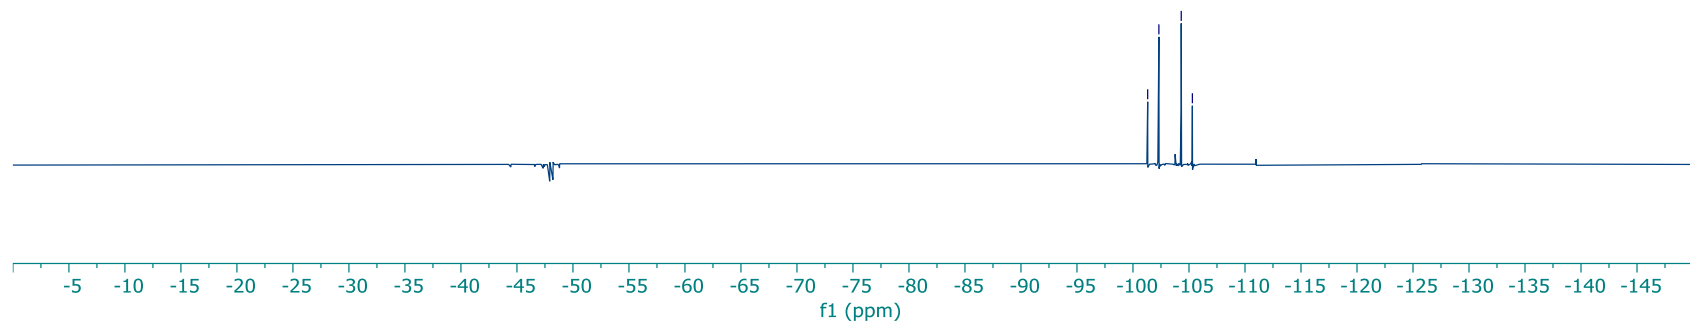



<sup>1</sup>H NMR (500 MHz, CDCl<sub>3</sub>) of **8**

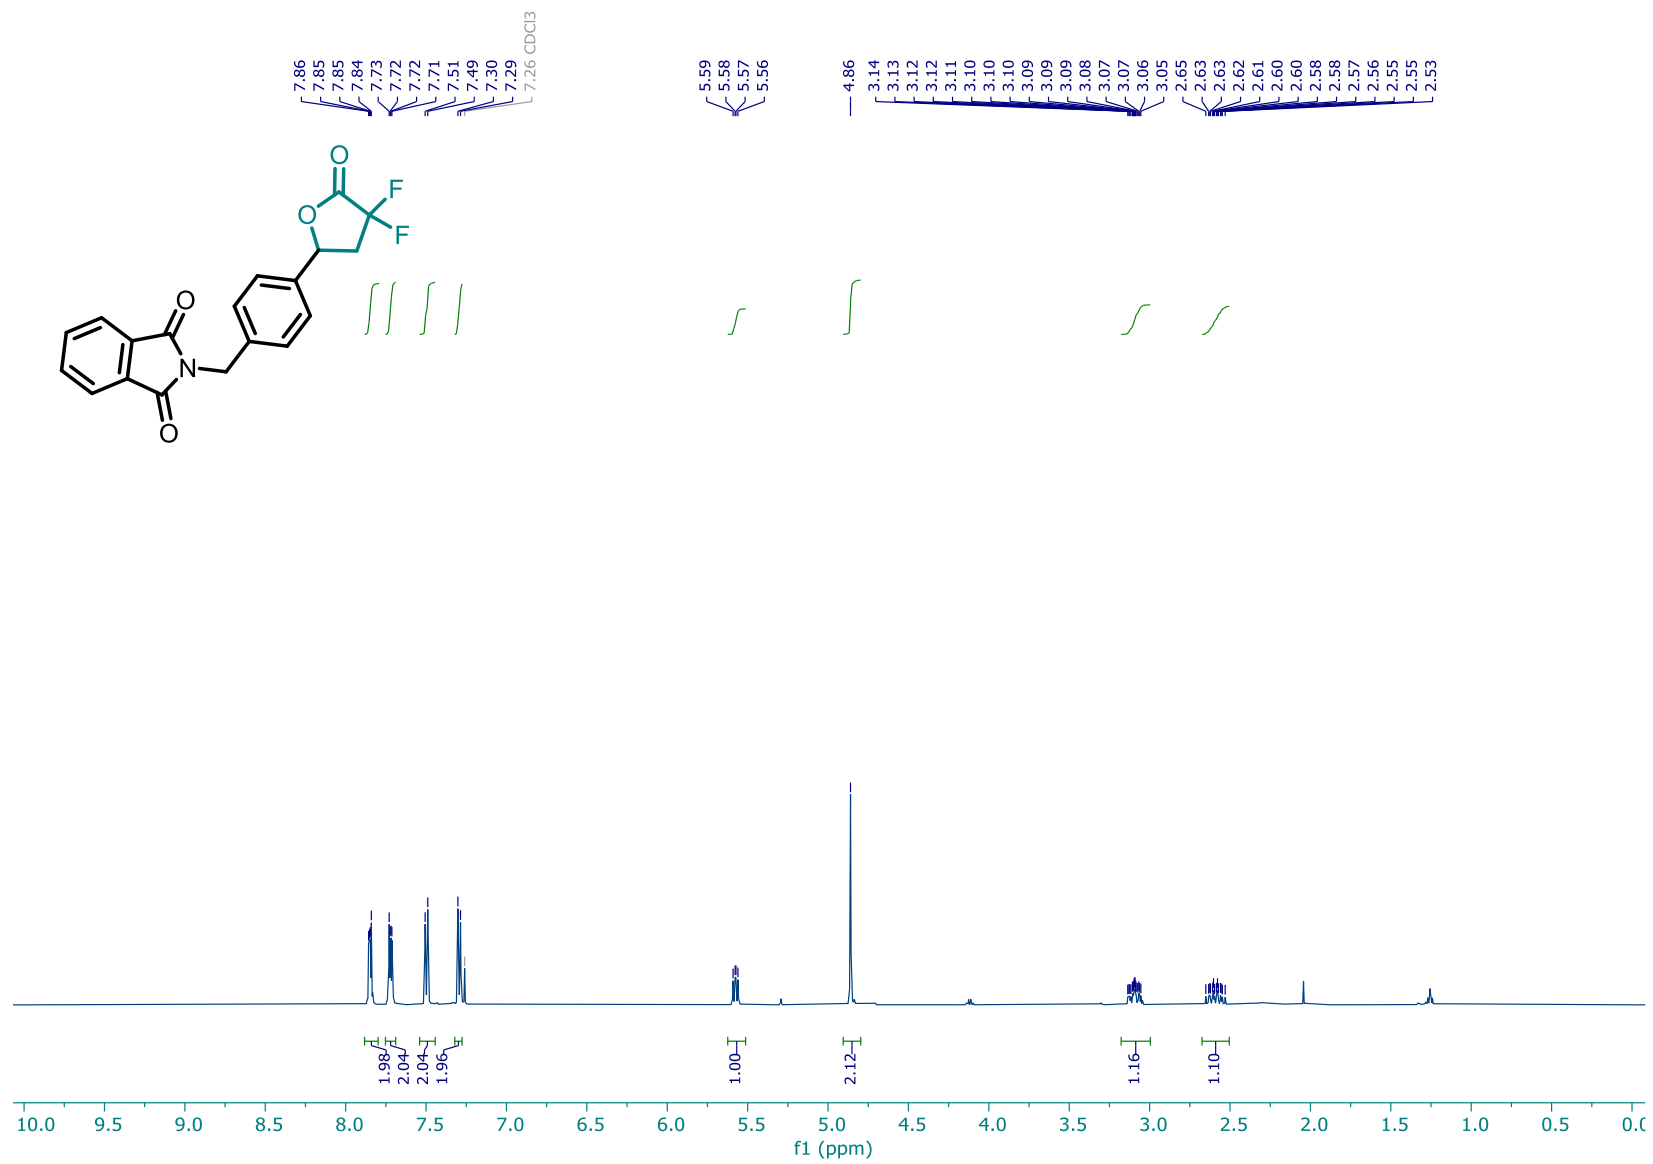

$^{13}\text{C}$  NMR (126 MHz,  $\text{CDCl}_3$ ) of **8**

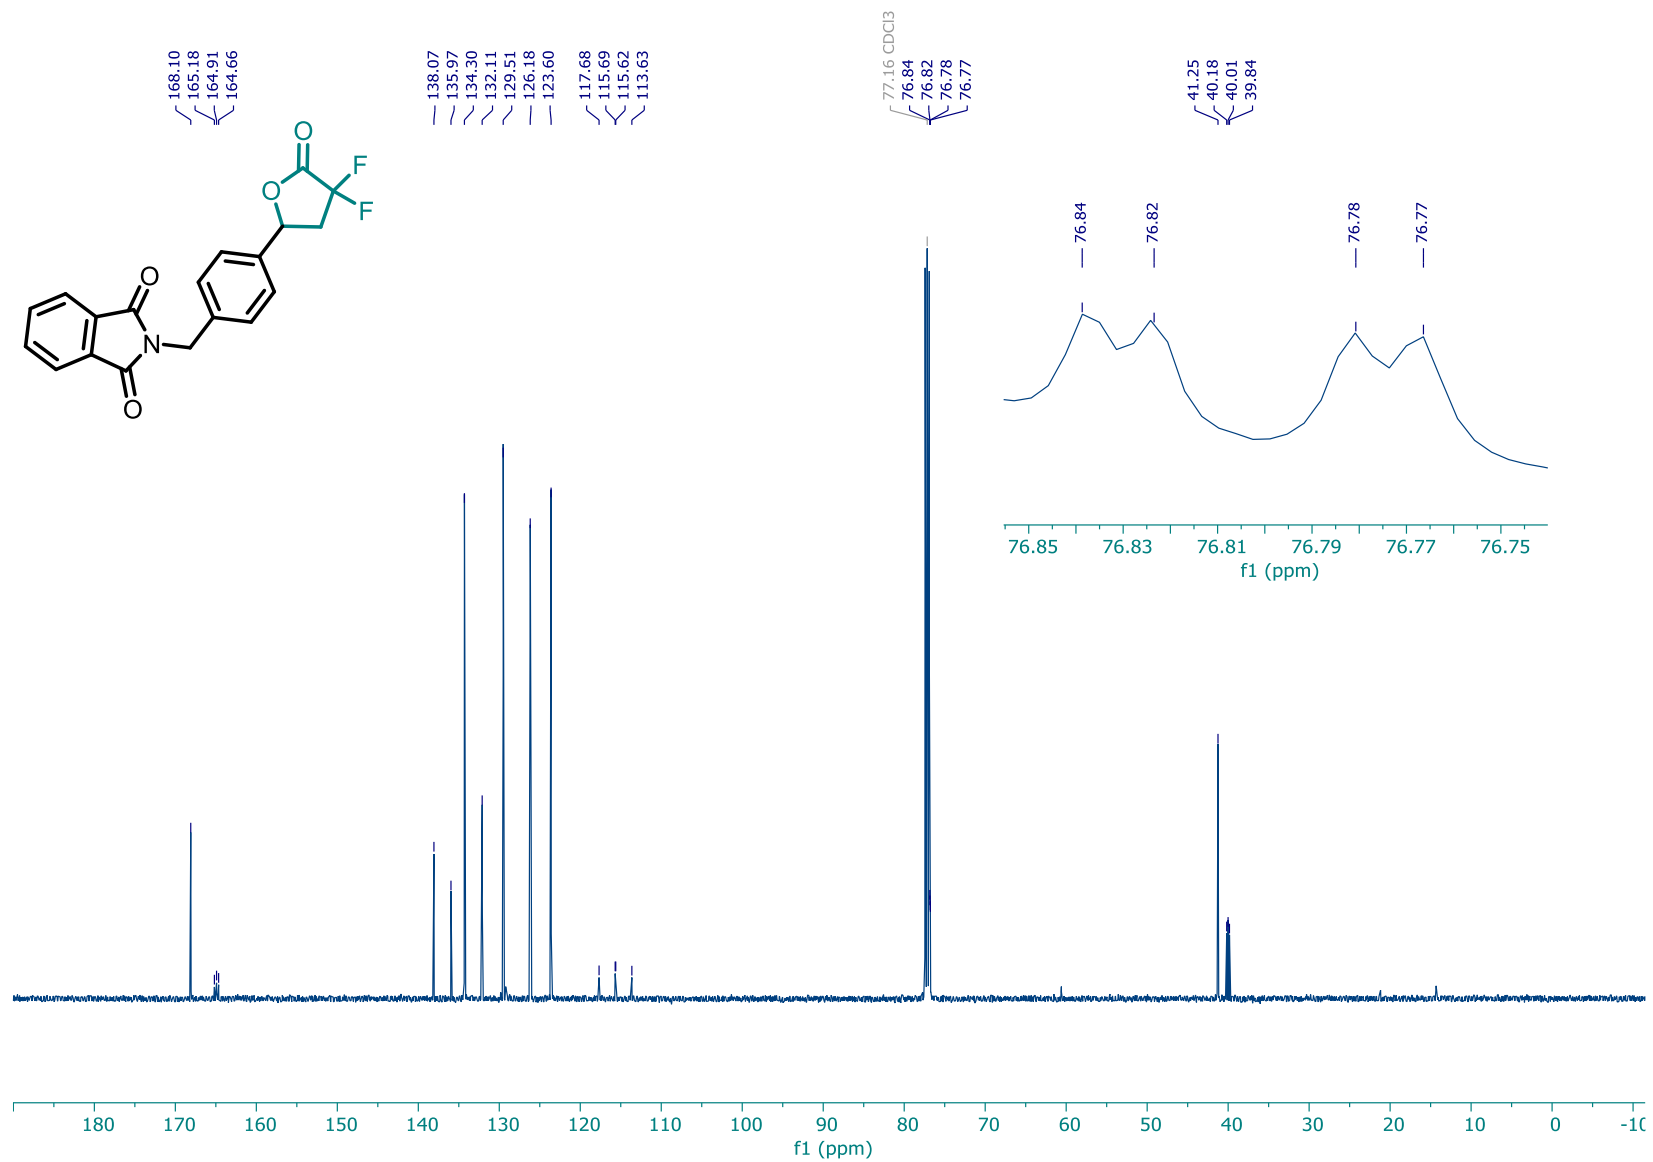

$^{19}\text{F}$  NMR (282 MHz,  $\text{CDCl}_3$ ) of **8**

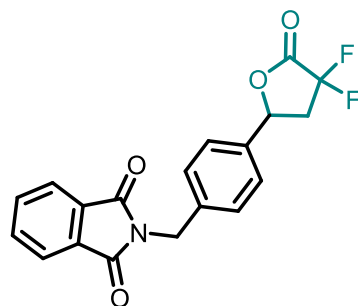

-106.00  
-106.99  
-108.71  
-109.70

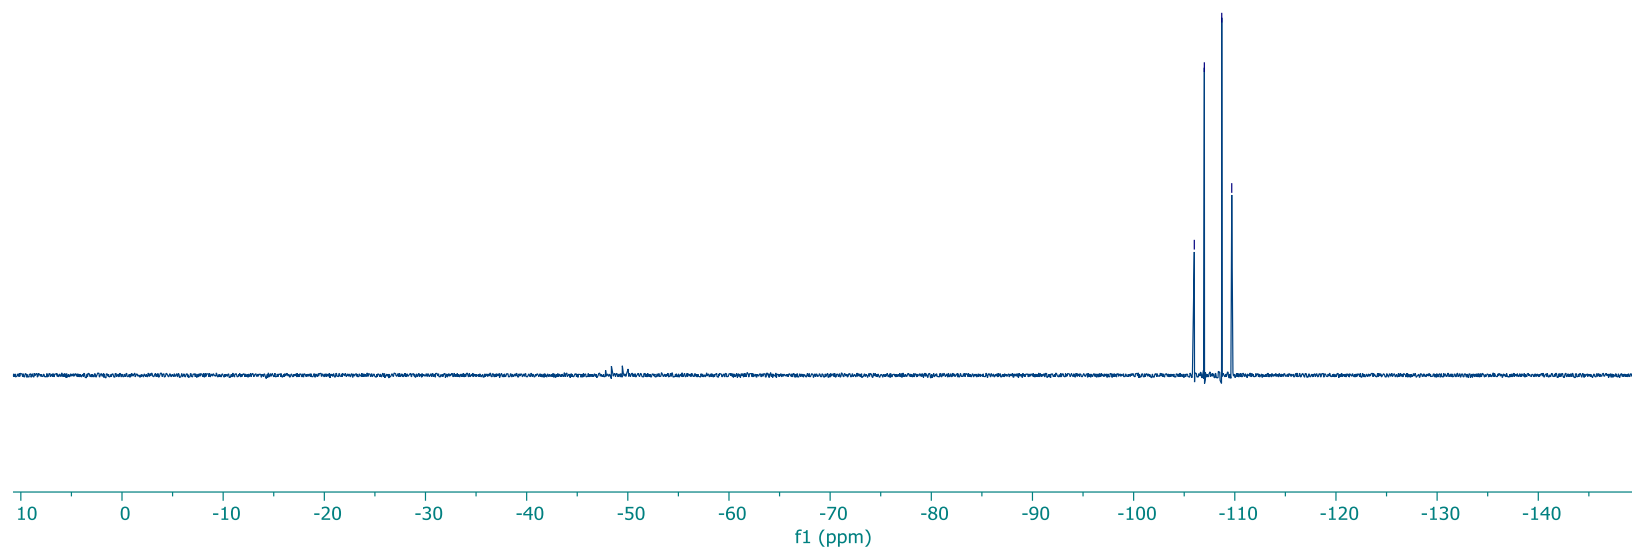

<sup>1</sup>H NMR (300 MHz, CDCl<sub>3</sub>) of **9**

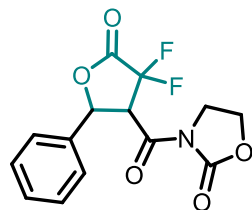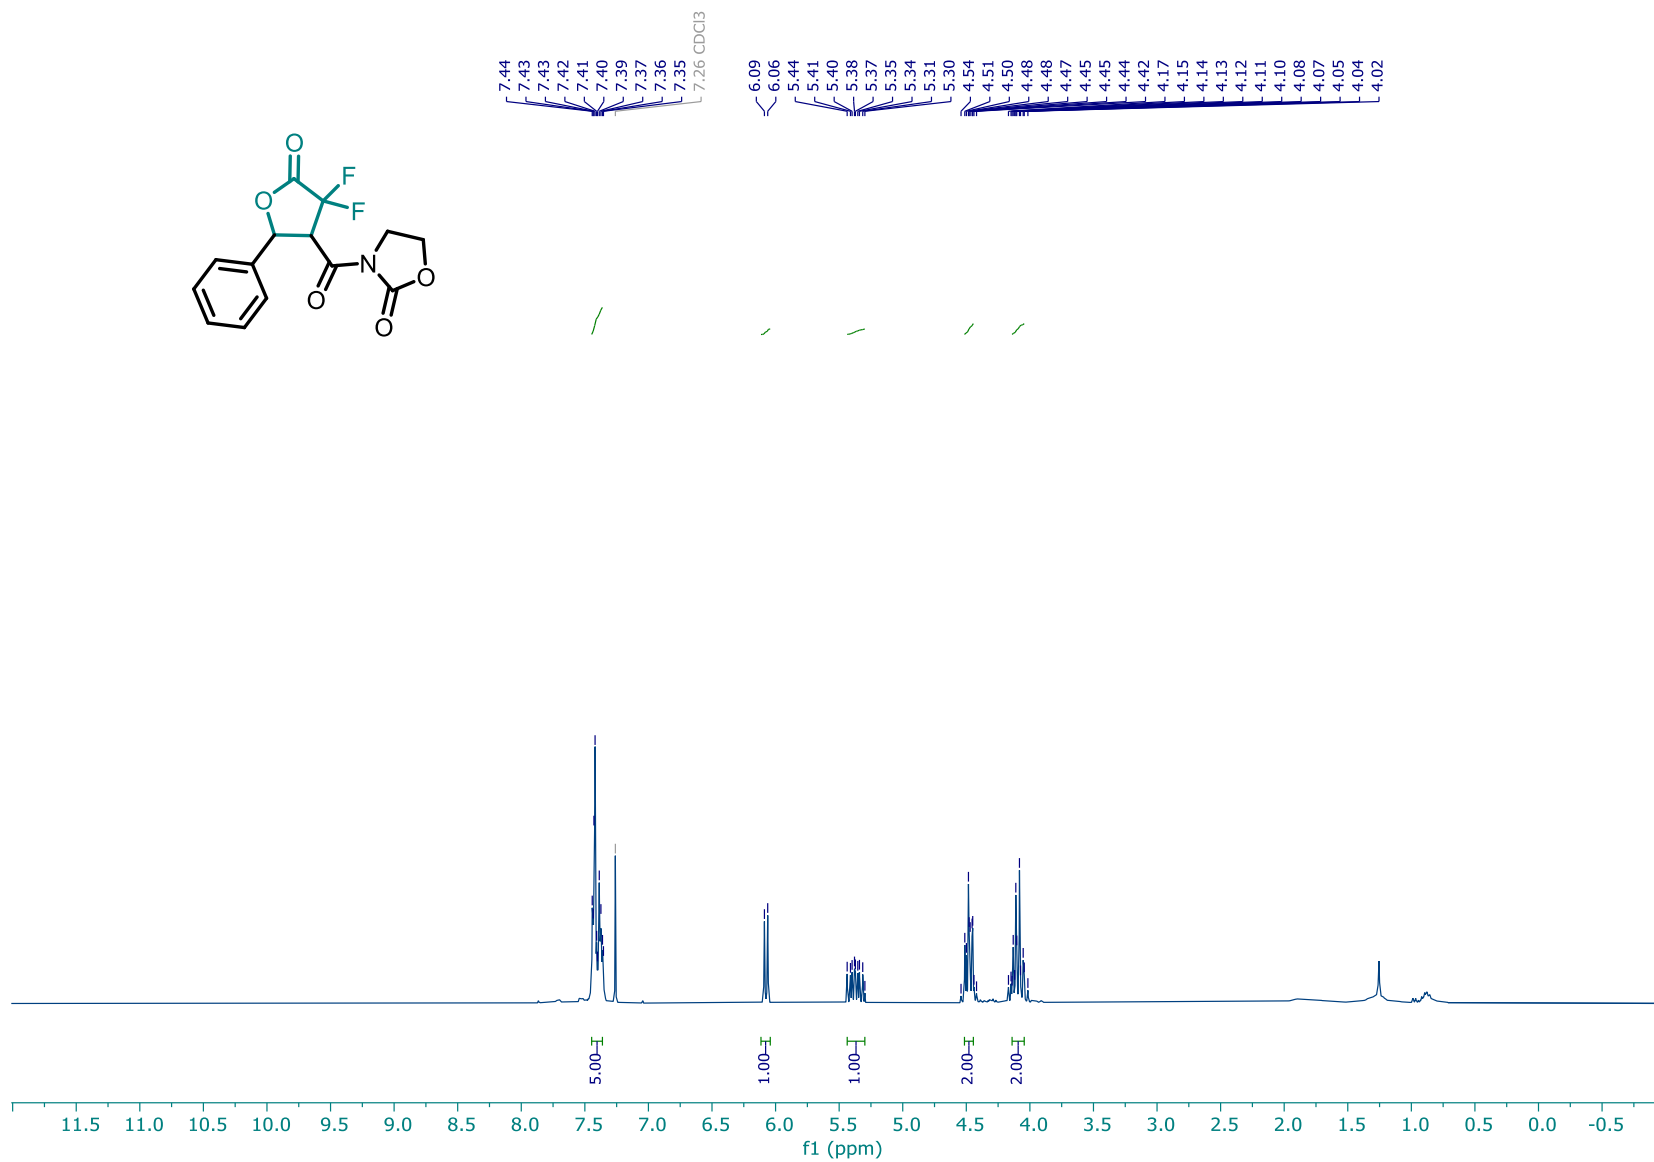

<sup>13</sup>C NMR (101 MHz, CDCl<sub>3</sub>) of **9**

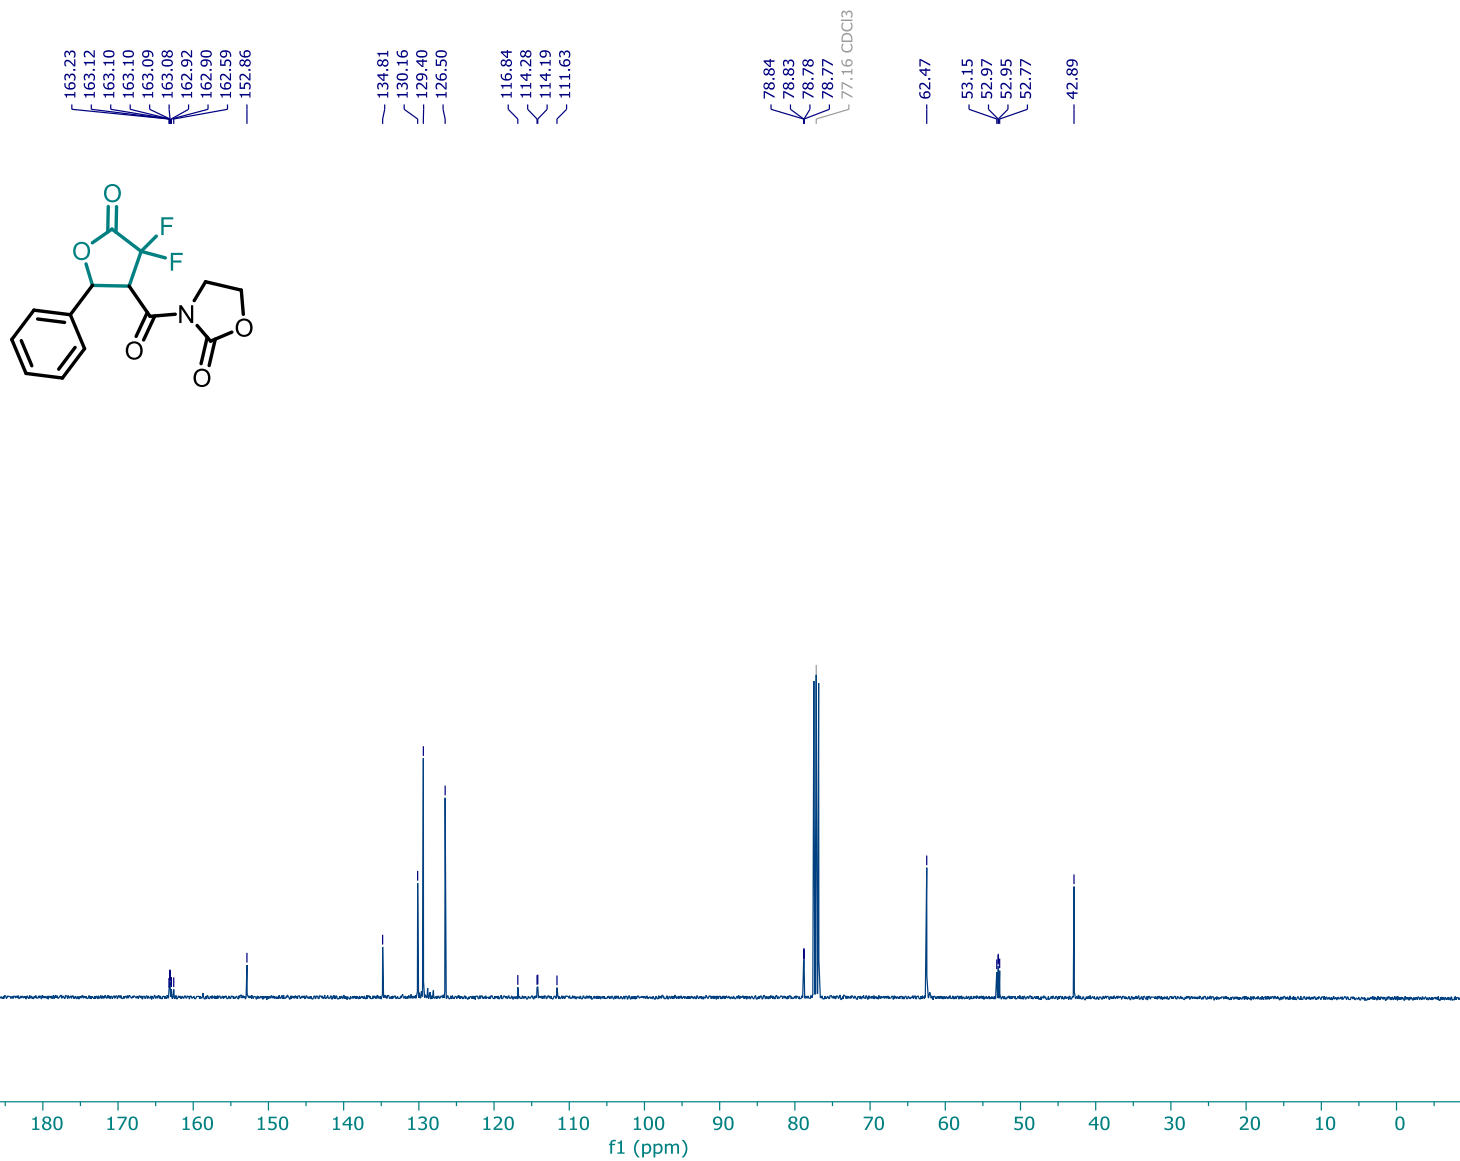

$^{19}\text{F}$  NMR (282 MHz,  $\text{CDCl}_3$ ) of **9**

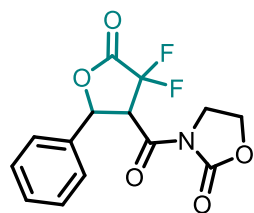

-106.93  
-107.90  
-111.06  
-112.03

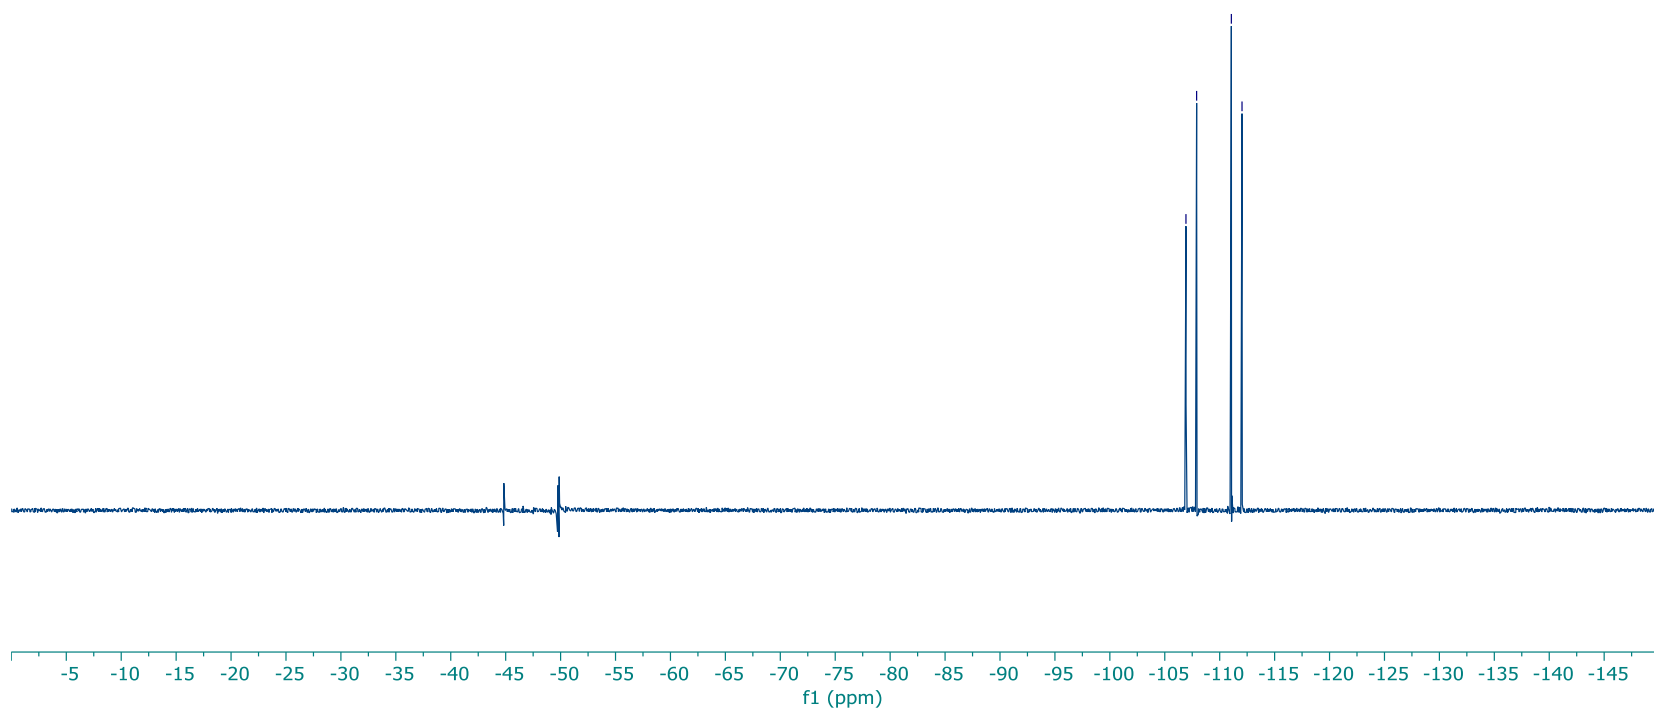

<sup>1</sup>H NMR (300 MHz, CDCl<sub>3</sub>) of **10**

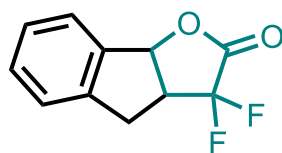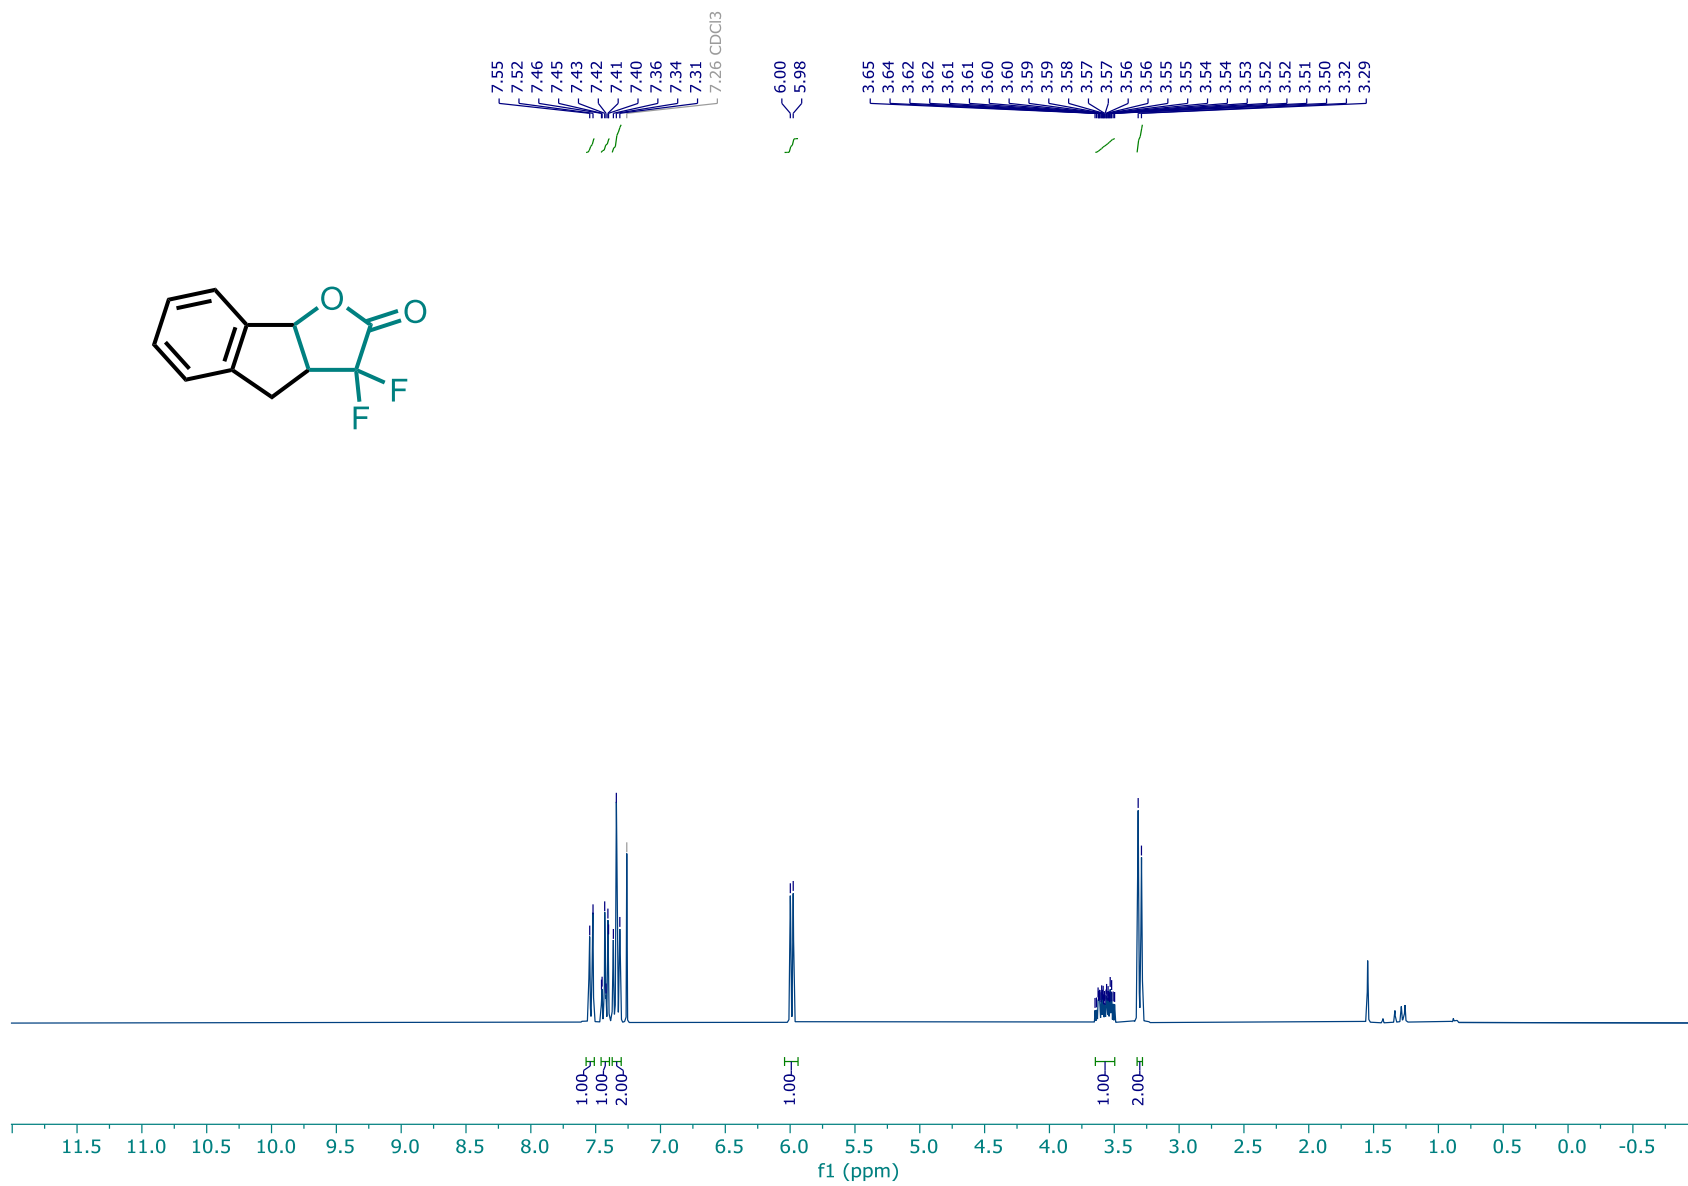

$^{13}\text{C}$  NMR (75 MHz,  $\text{CDCl}_3$ ) of **10**

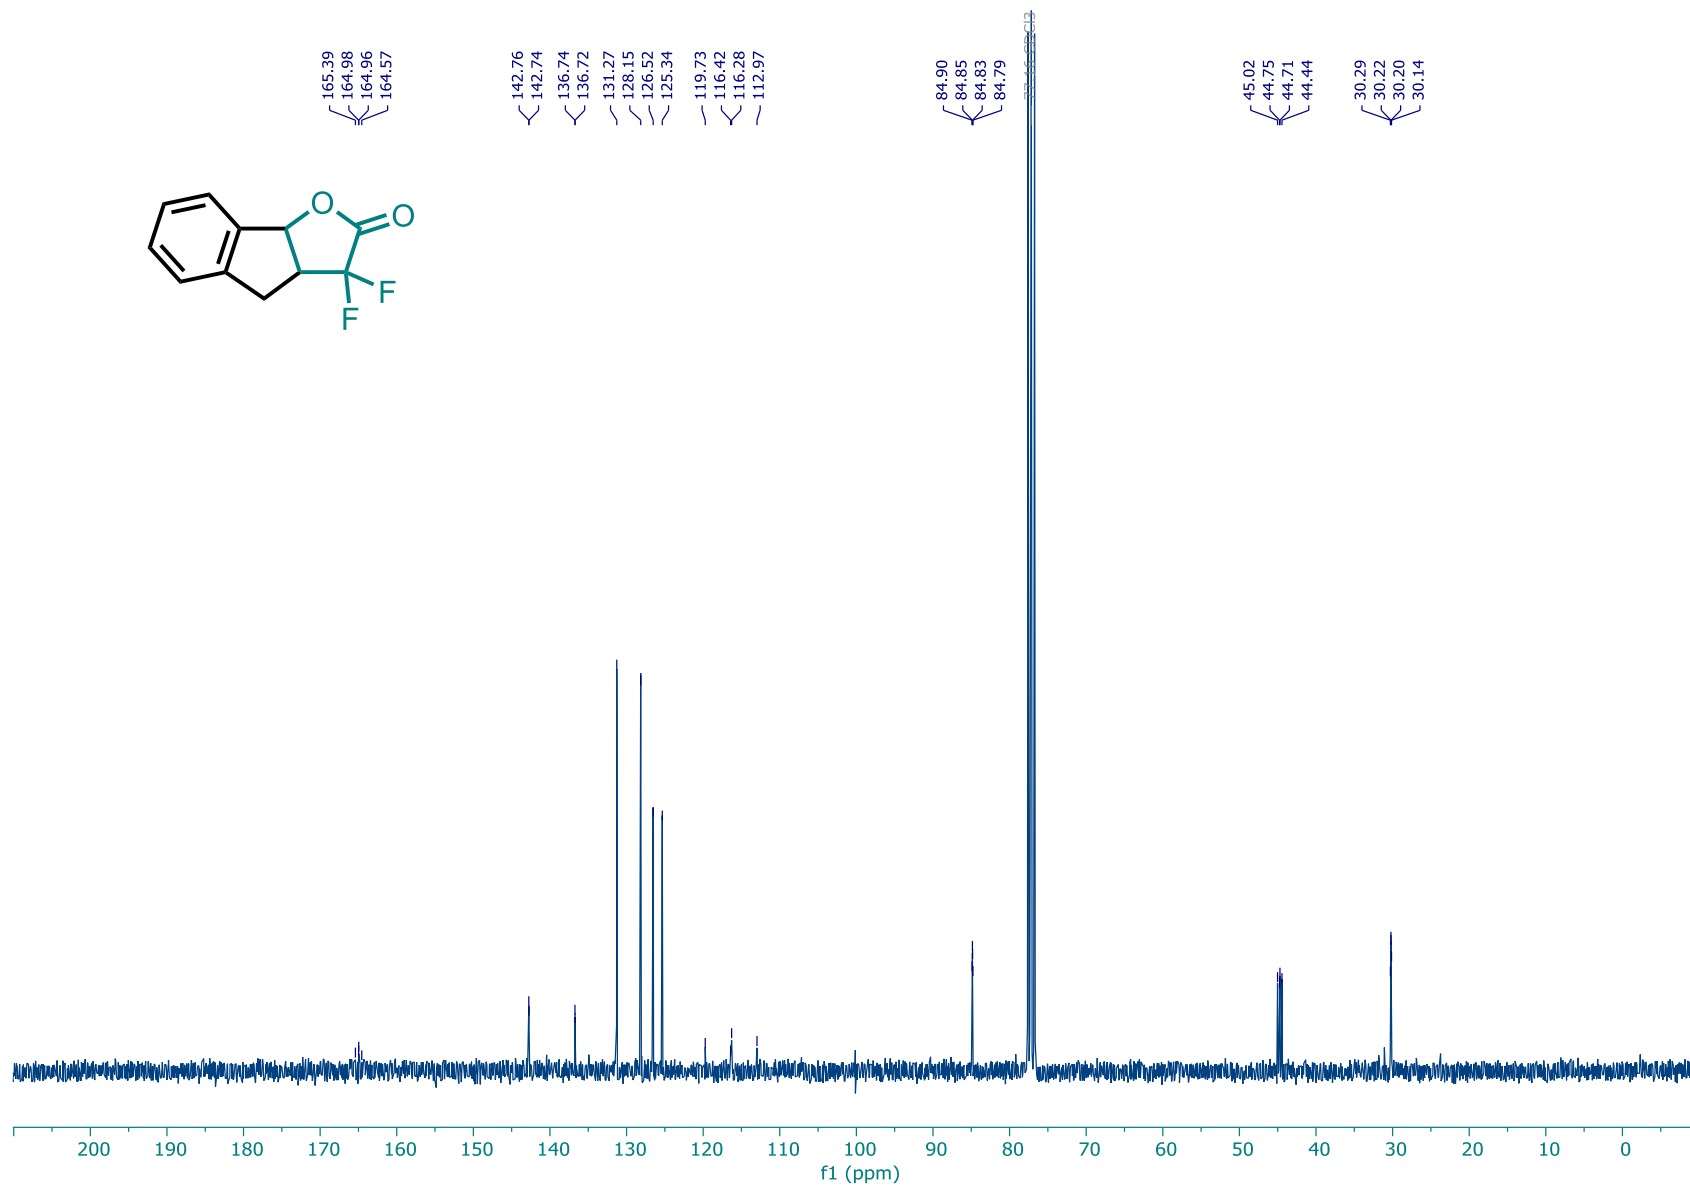



$^{19}\text{F}$  NMR (282 MHz,  $\text{CDCl}_3$ ) of **10**

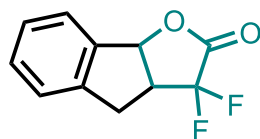

-100.59  
-101.59

-114.10  
-115.10

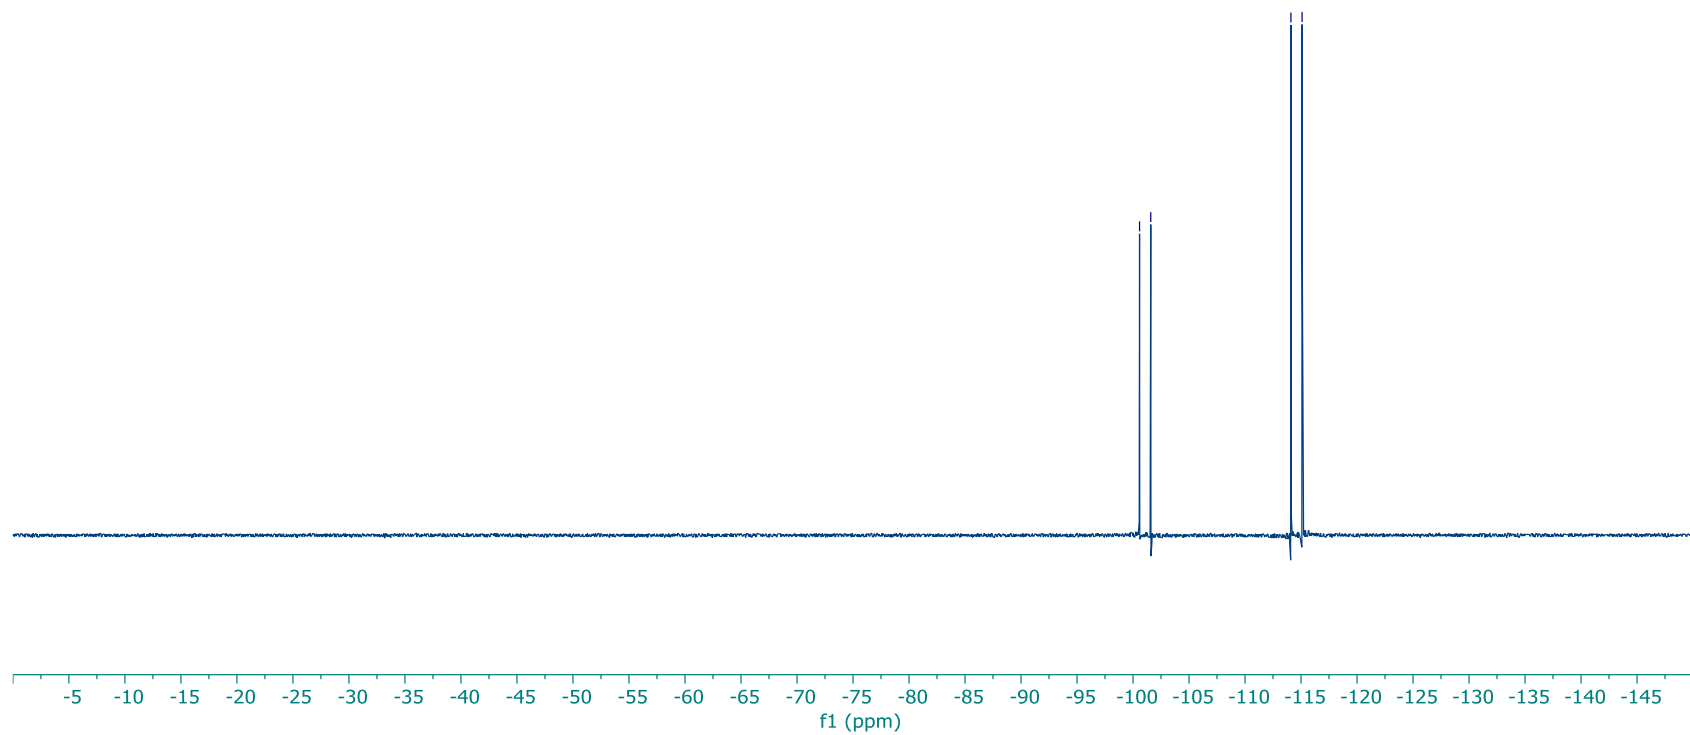

$^1\text{H}$  NMR (300 MHz,  $\text{CDCl}_3$ ) of **11**

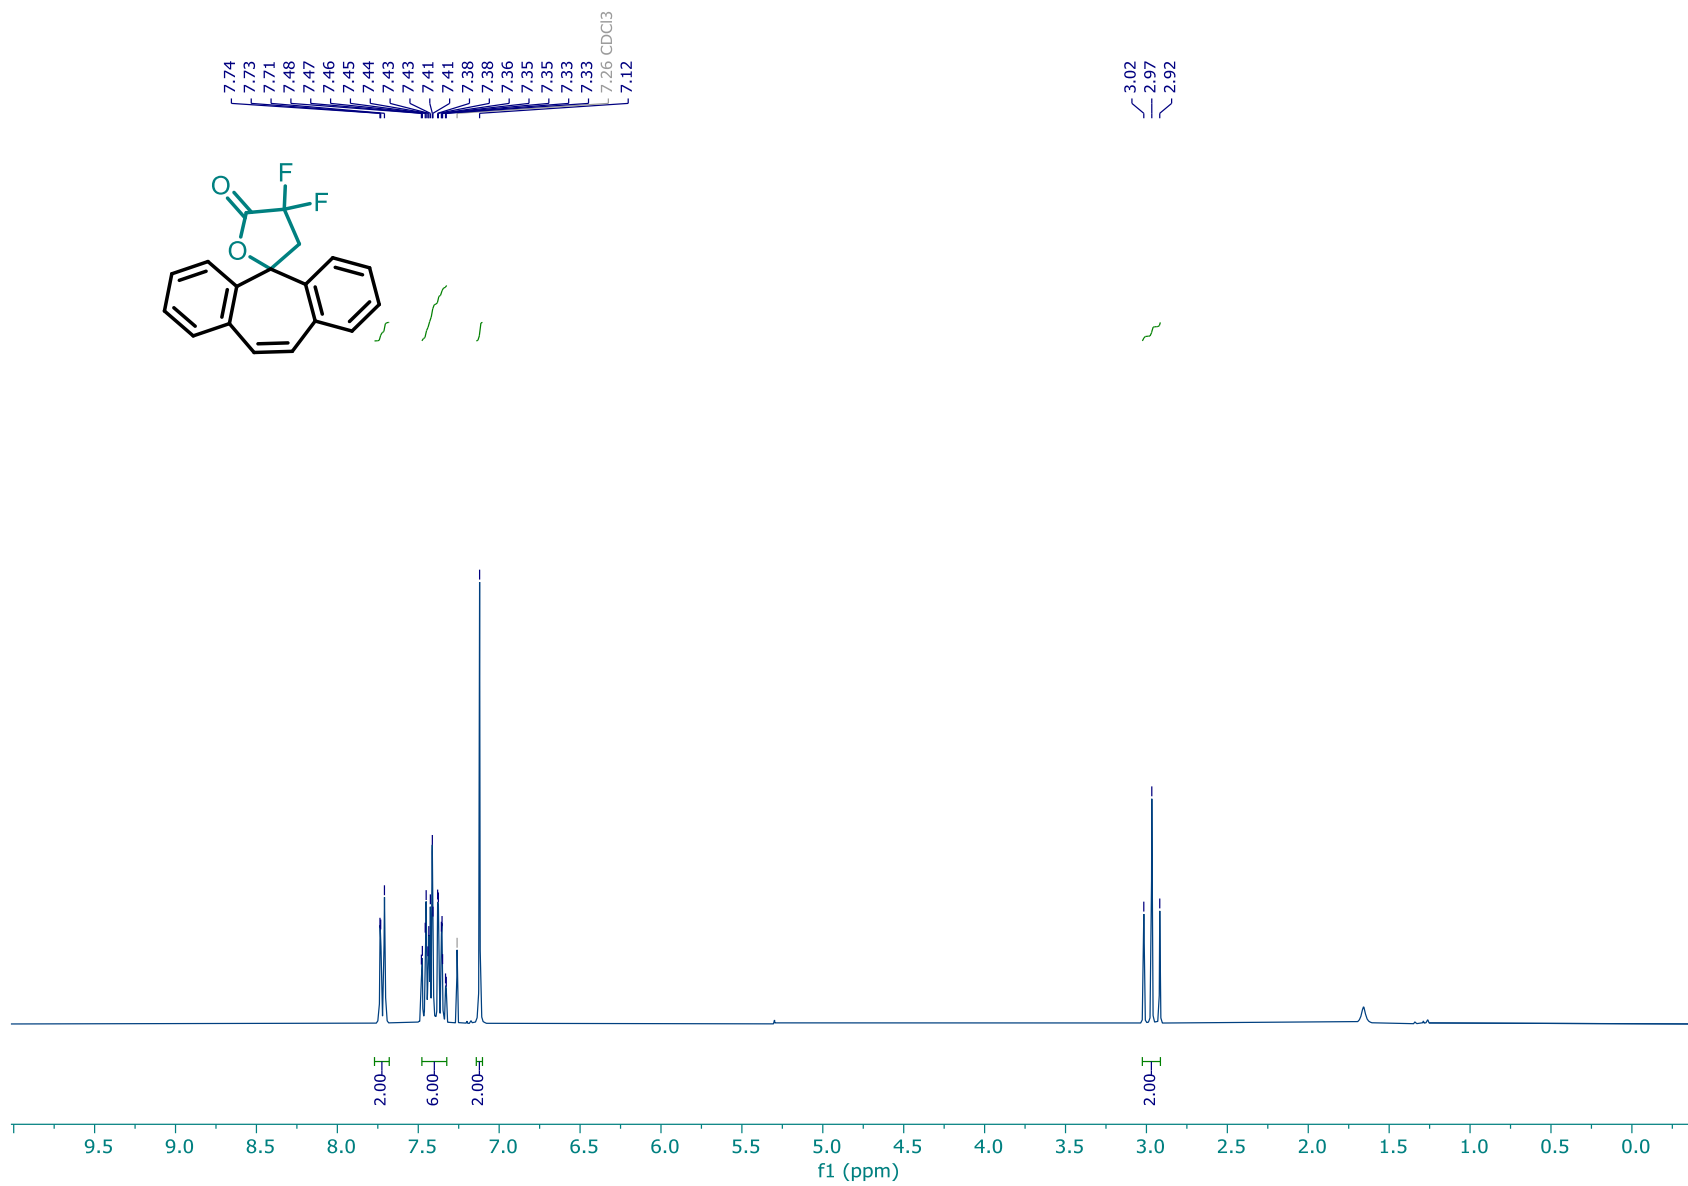

$^{13}\text{C}$  NMR (75 MHz,  $\text{CDCl}_3$ ) of **11**

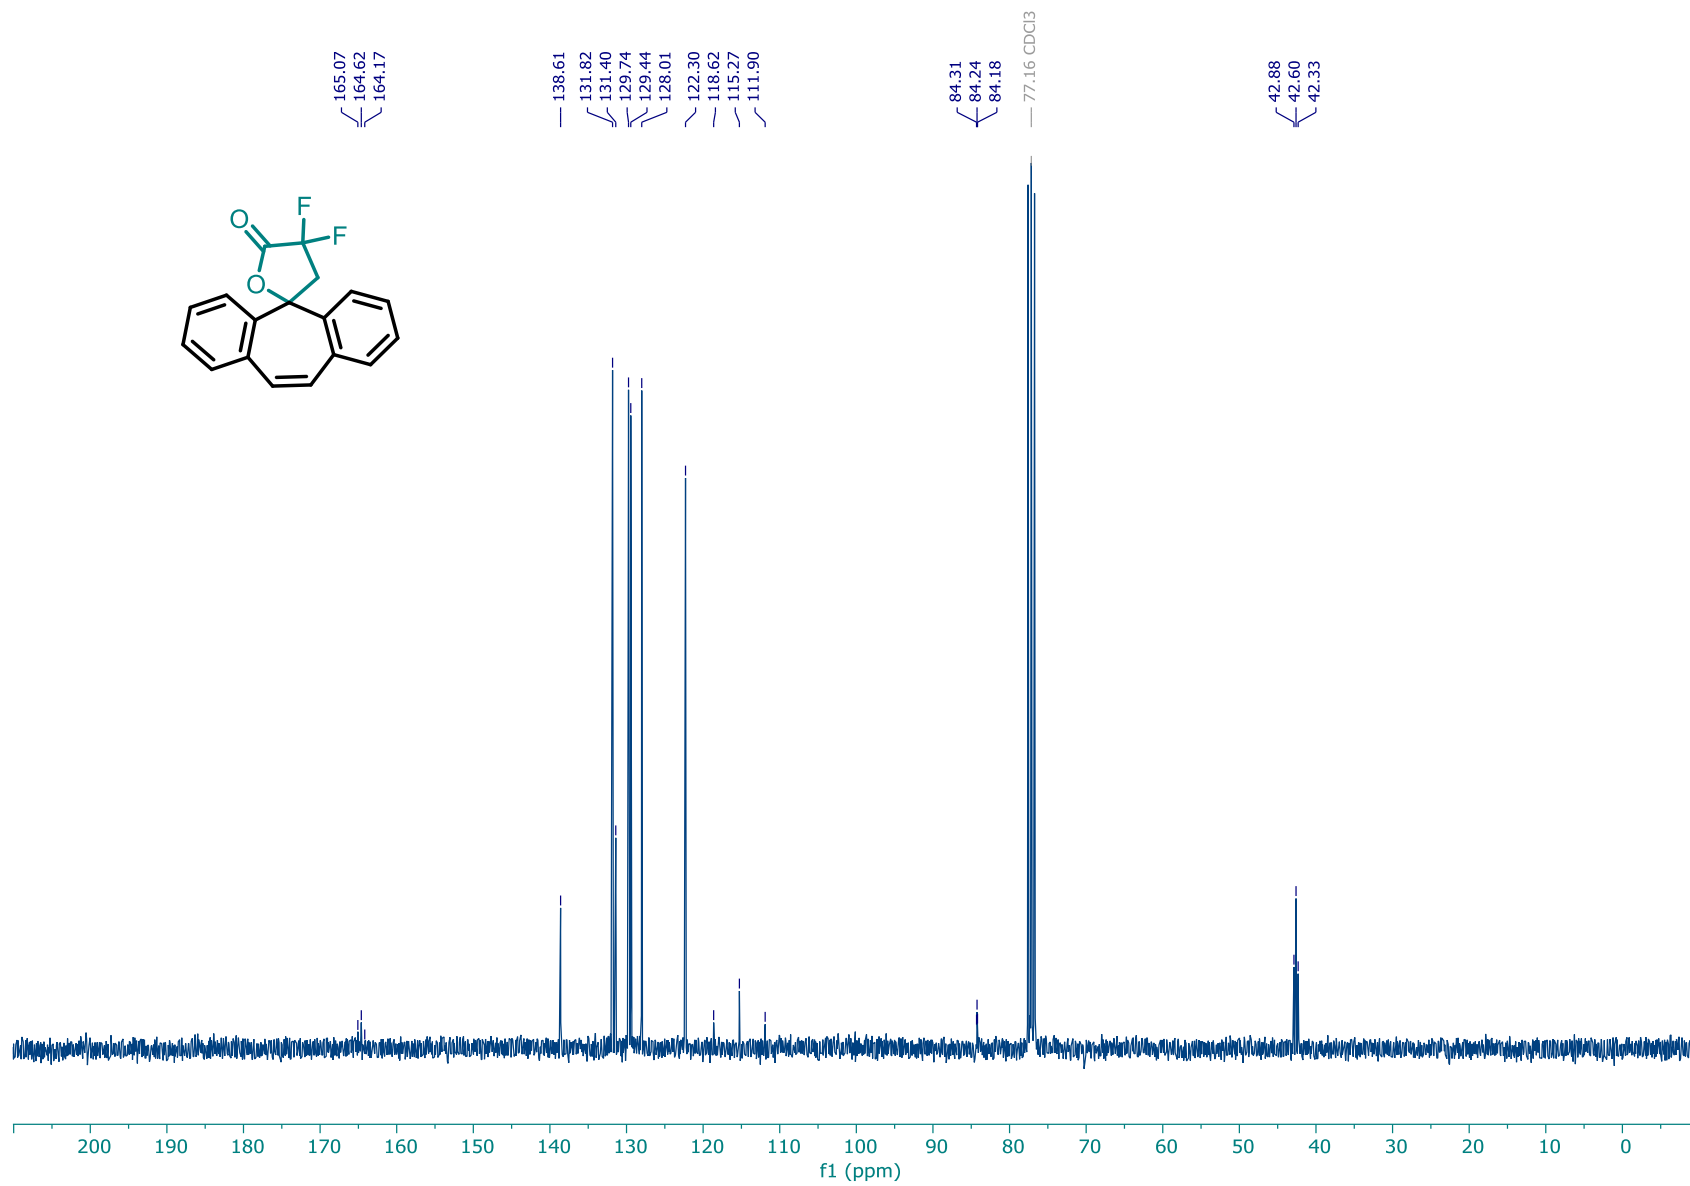

$^{19}\text{F}$  NMR (282 MHz,  $\text{CDCl}_3$ ) of **11**

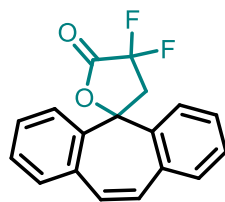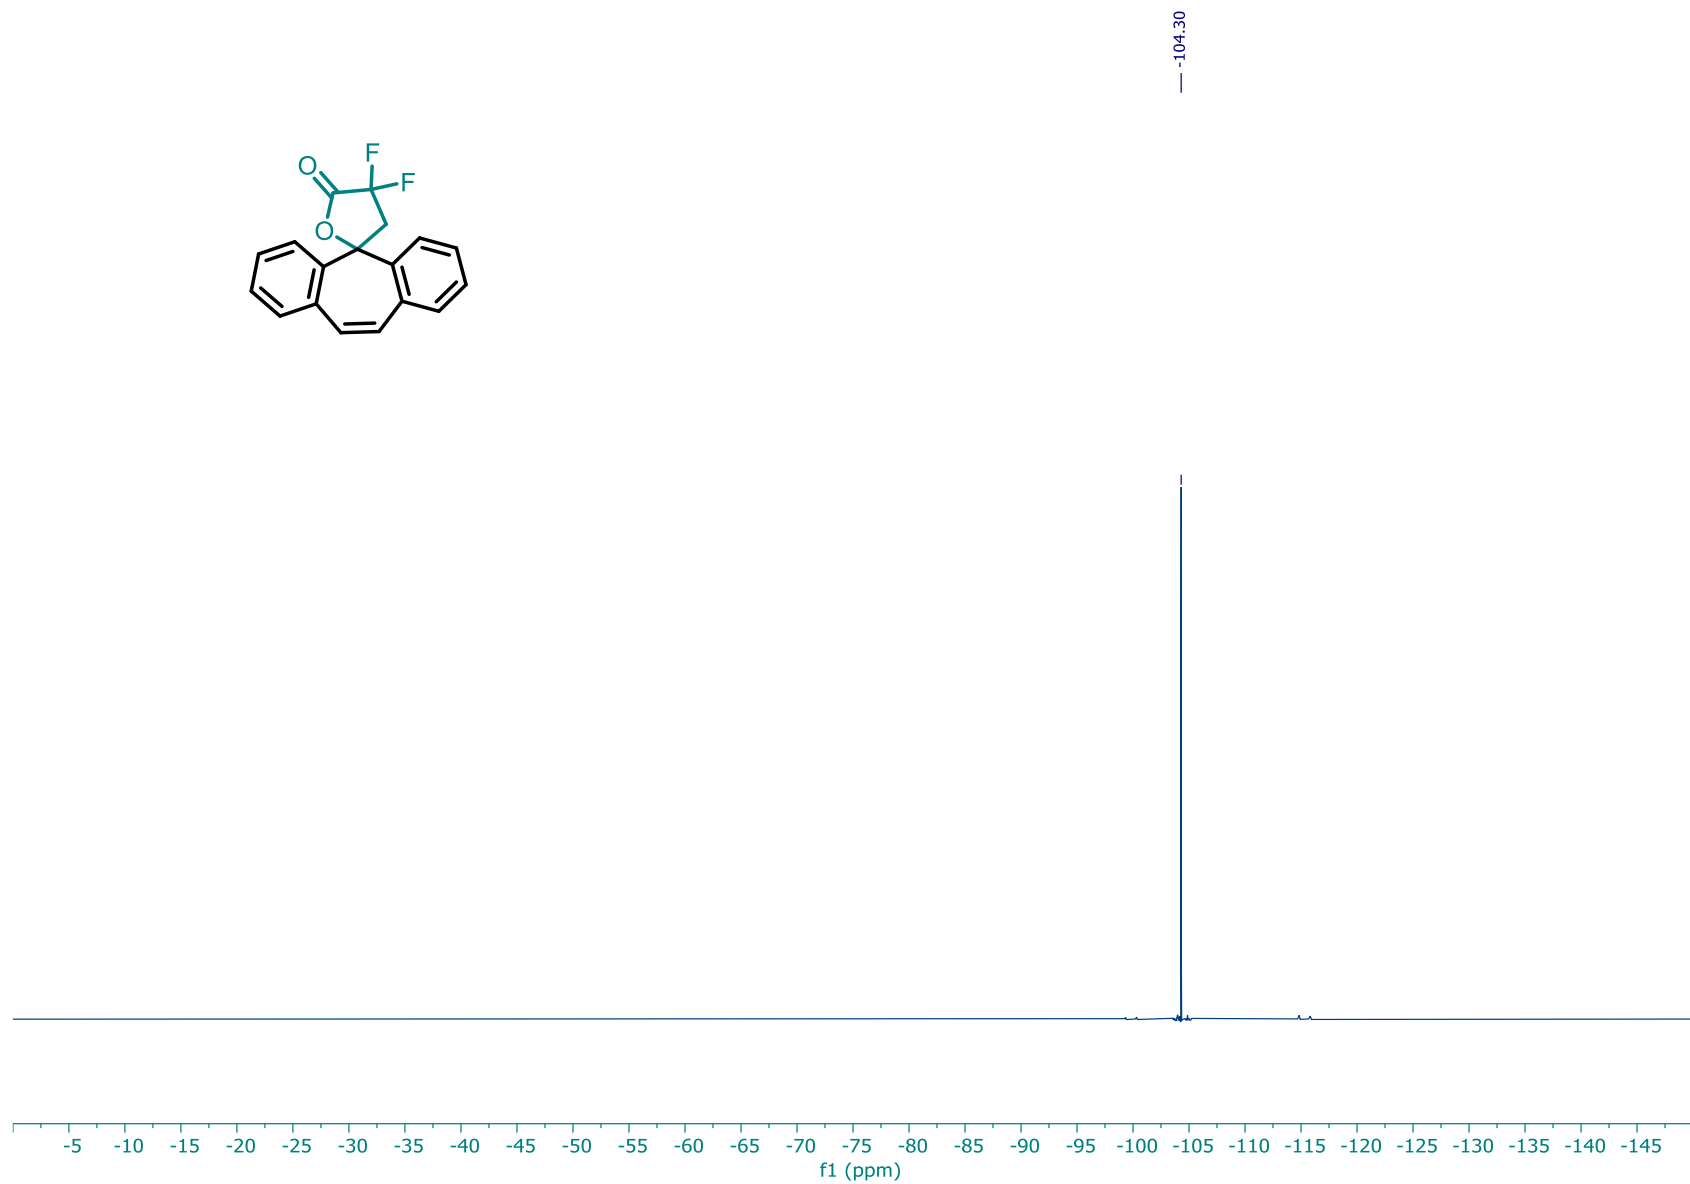

<sup>1</sup>H NMR (300 MHz, CDCl<sub>3</sub>) of **12**

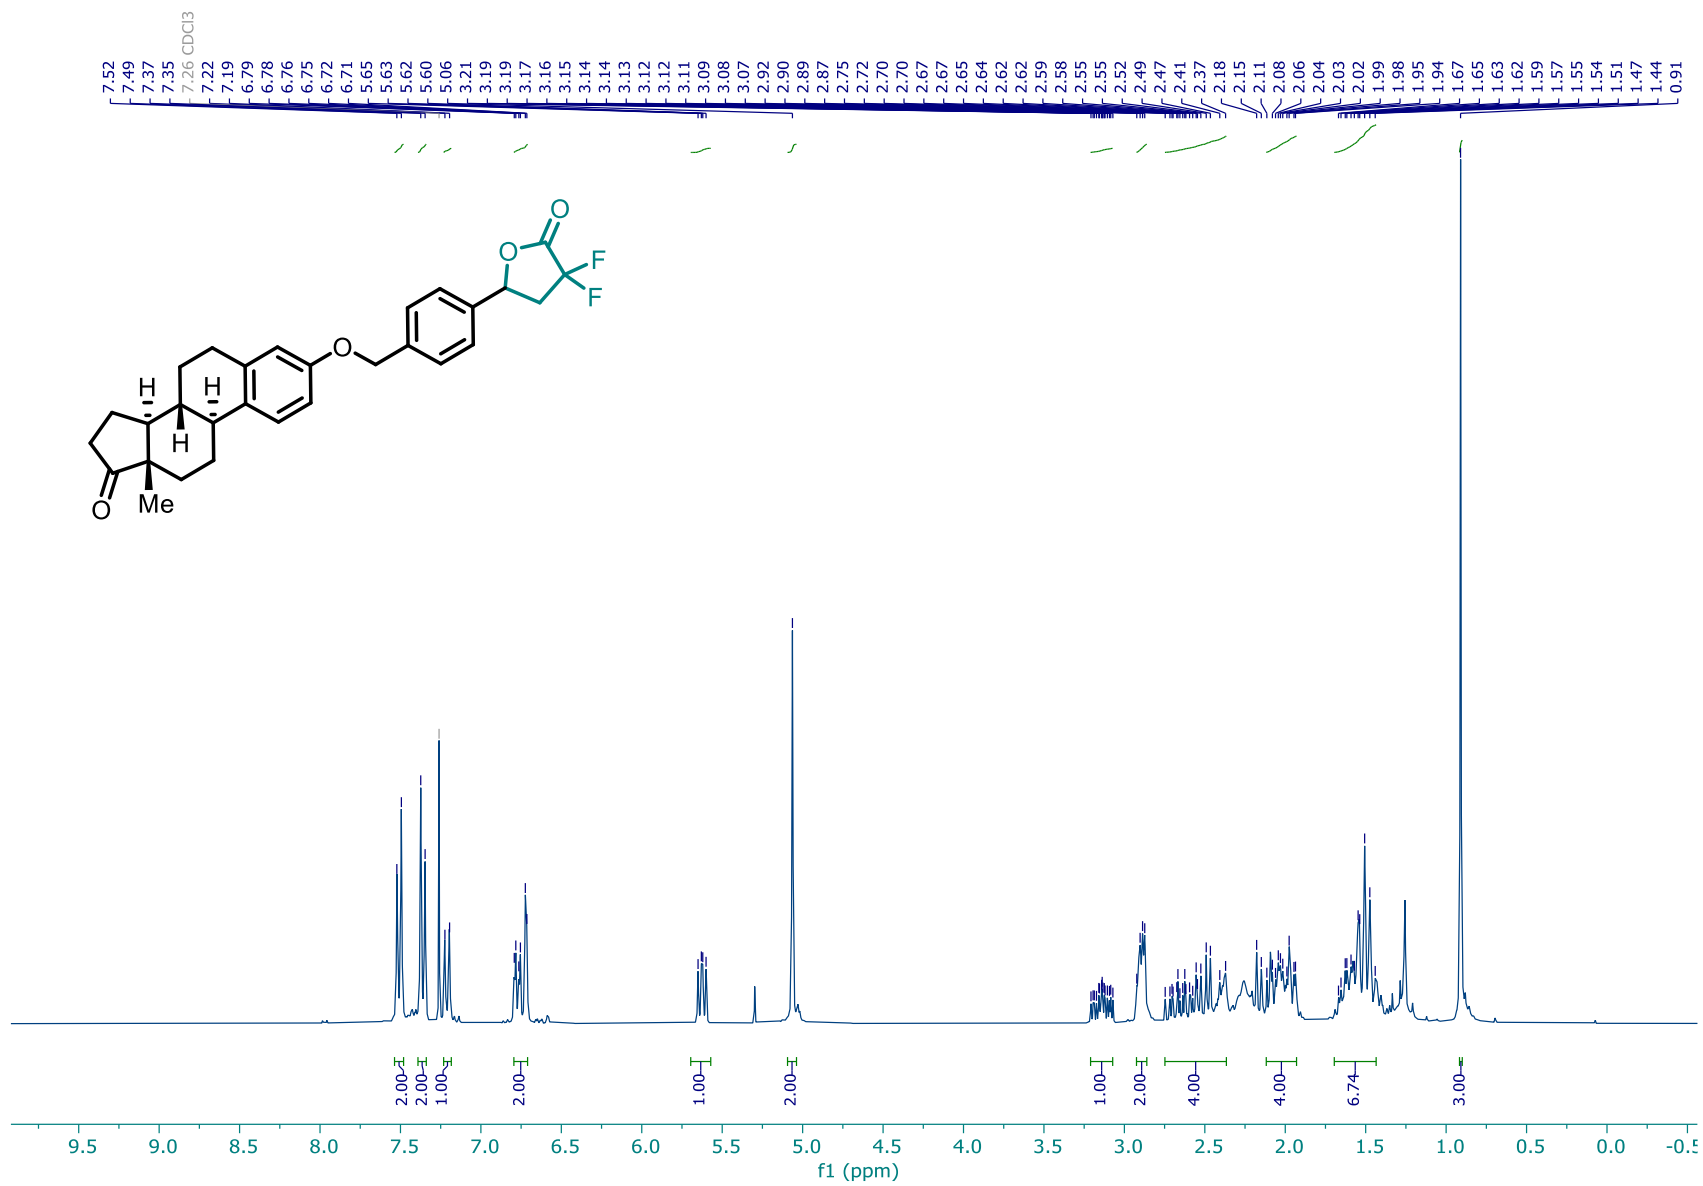

<sup>13</sup>C NMR (101 MHz, CDCl<sub>3</sub>) of **12**

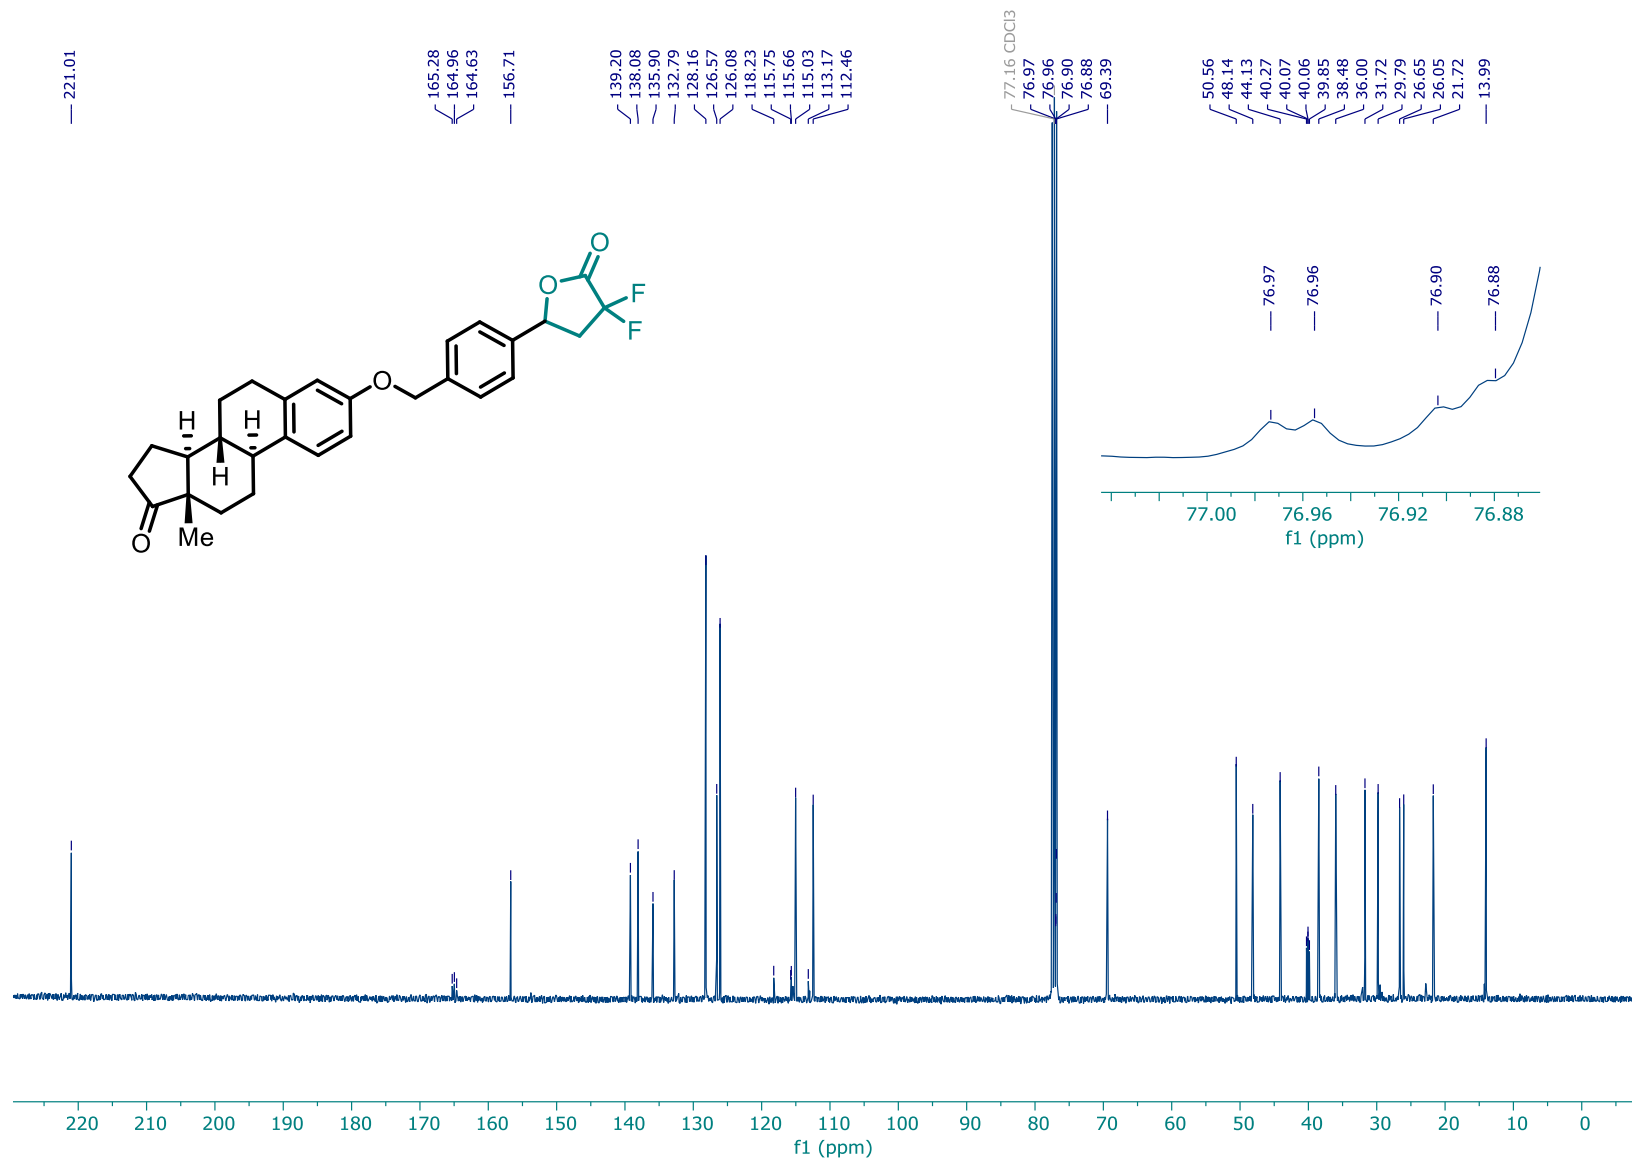

$^{19}\text{F}$  NMR (282 MHz,  $\text{CDCl}_3$ ) of **12**

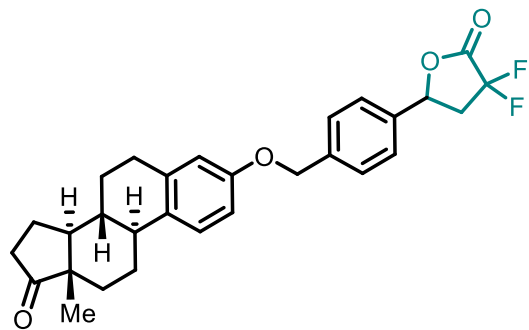

-105.97  
-106.95  
-108.60  
-109.59

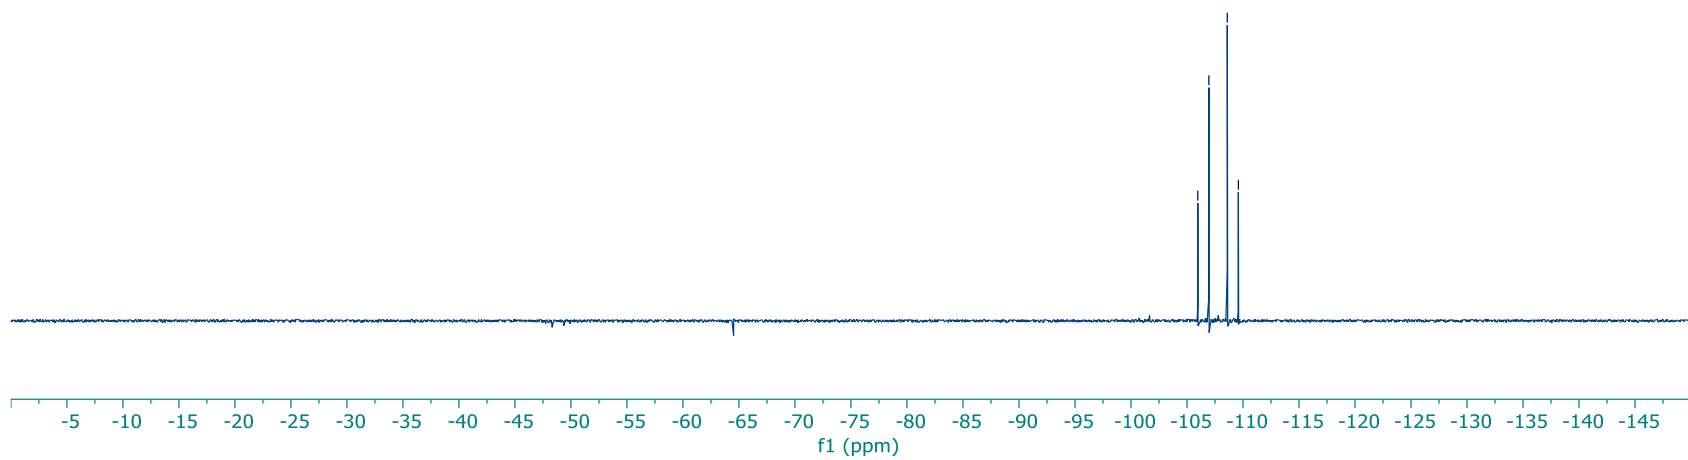

<sup>1</sup>H NMR (400 MHz, CDCl<sub>3</sub>) of **13**

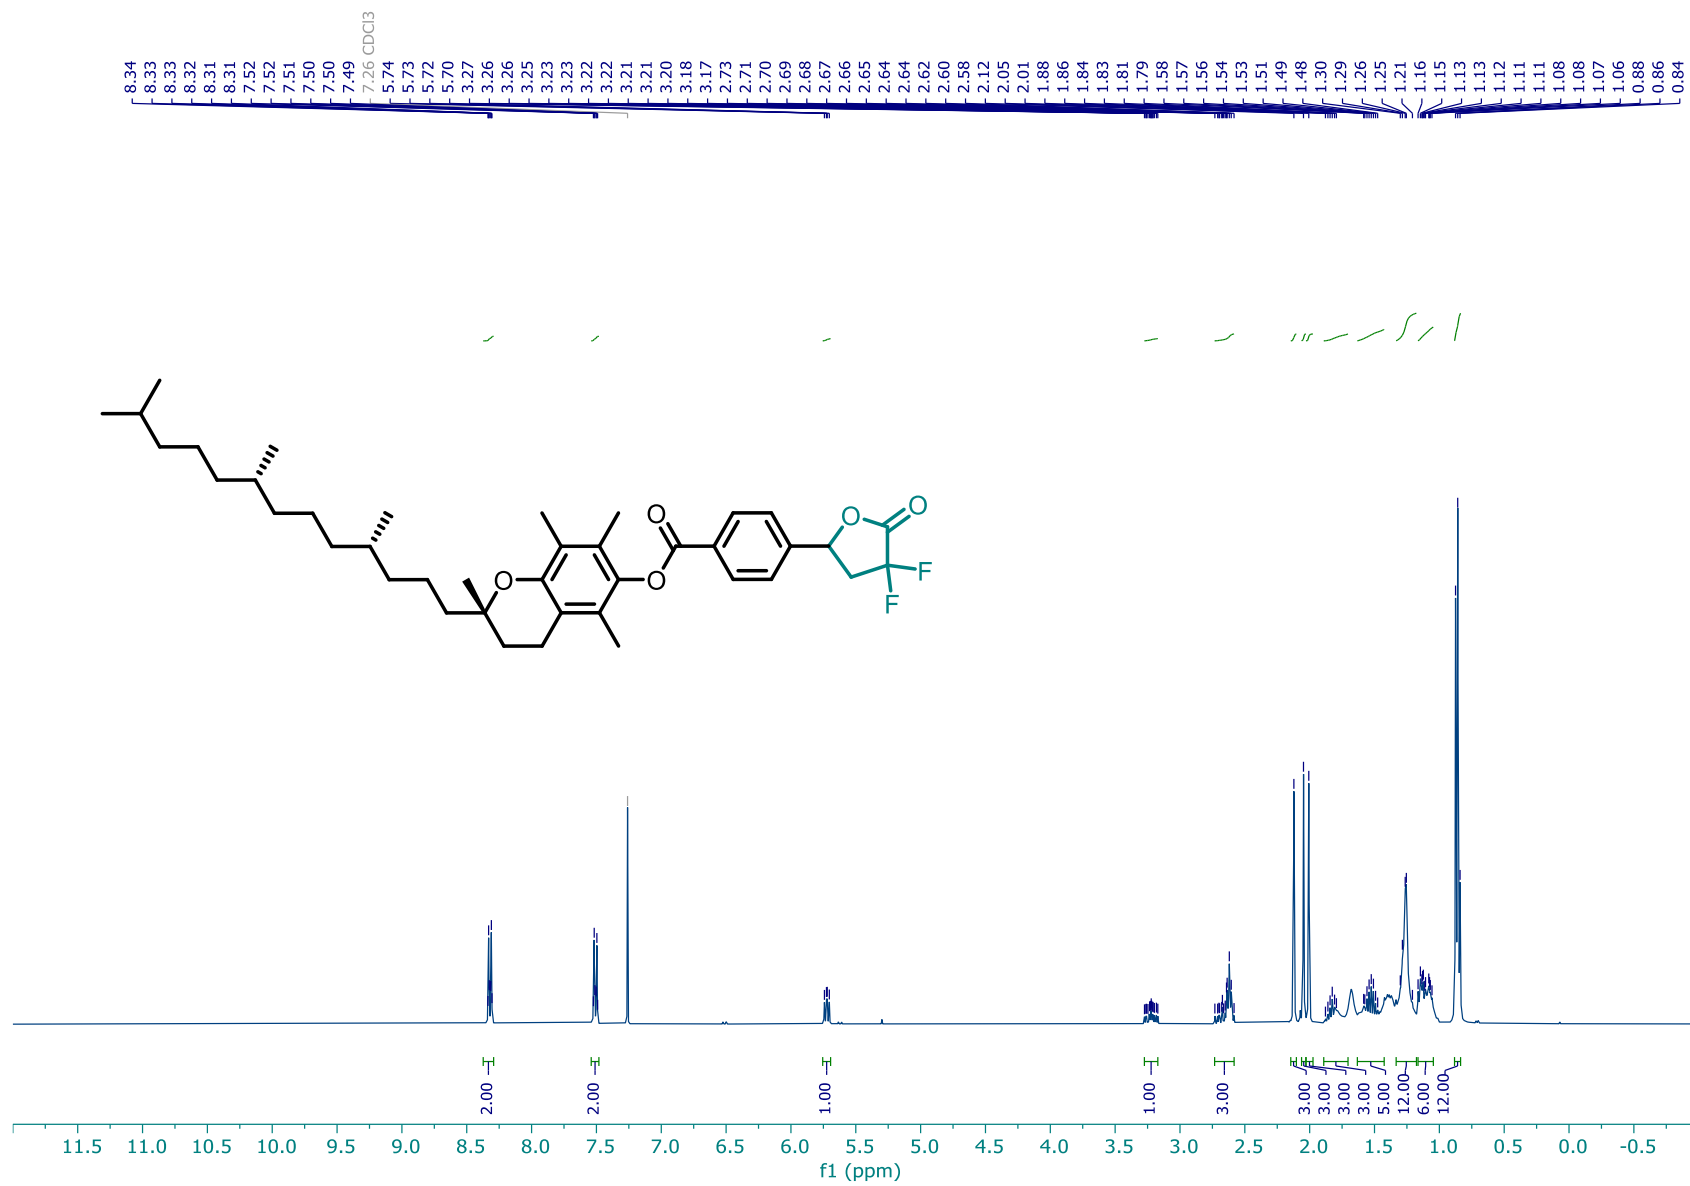



$^{13}\text{C}$  NMR (101 MHz,  $\text{CDCl}_3$ ) of **13**

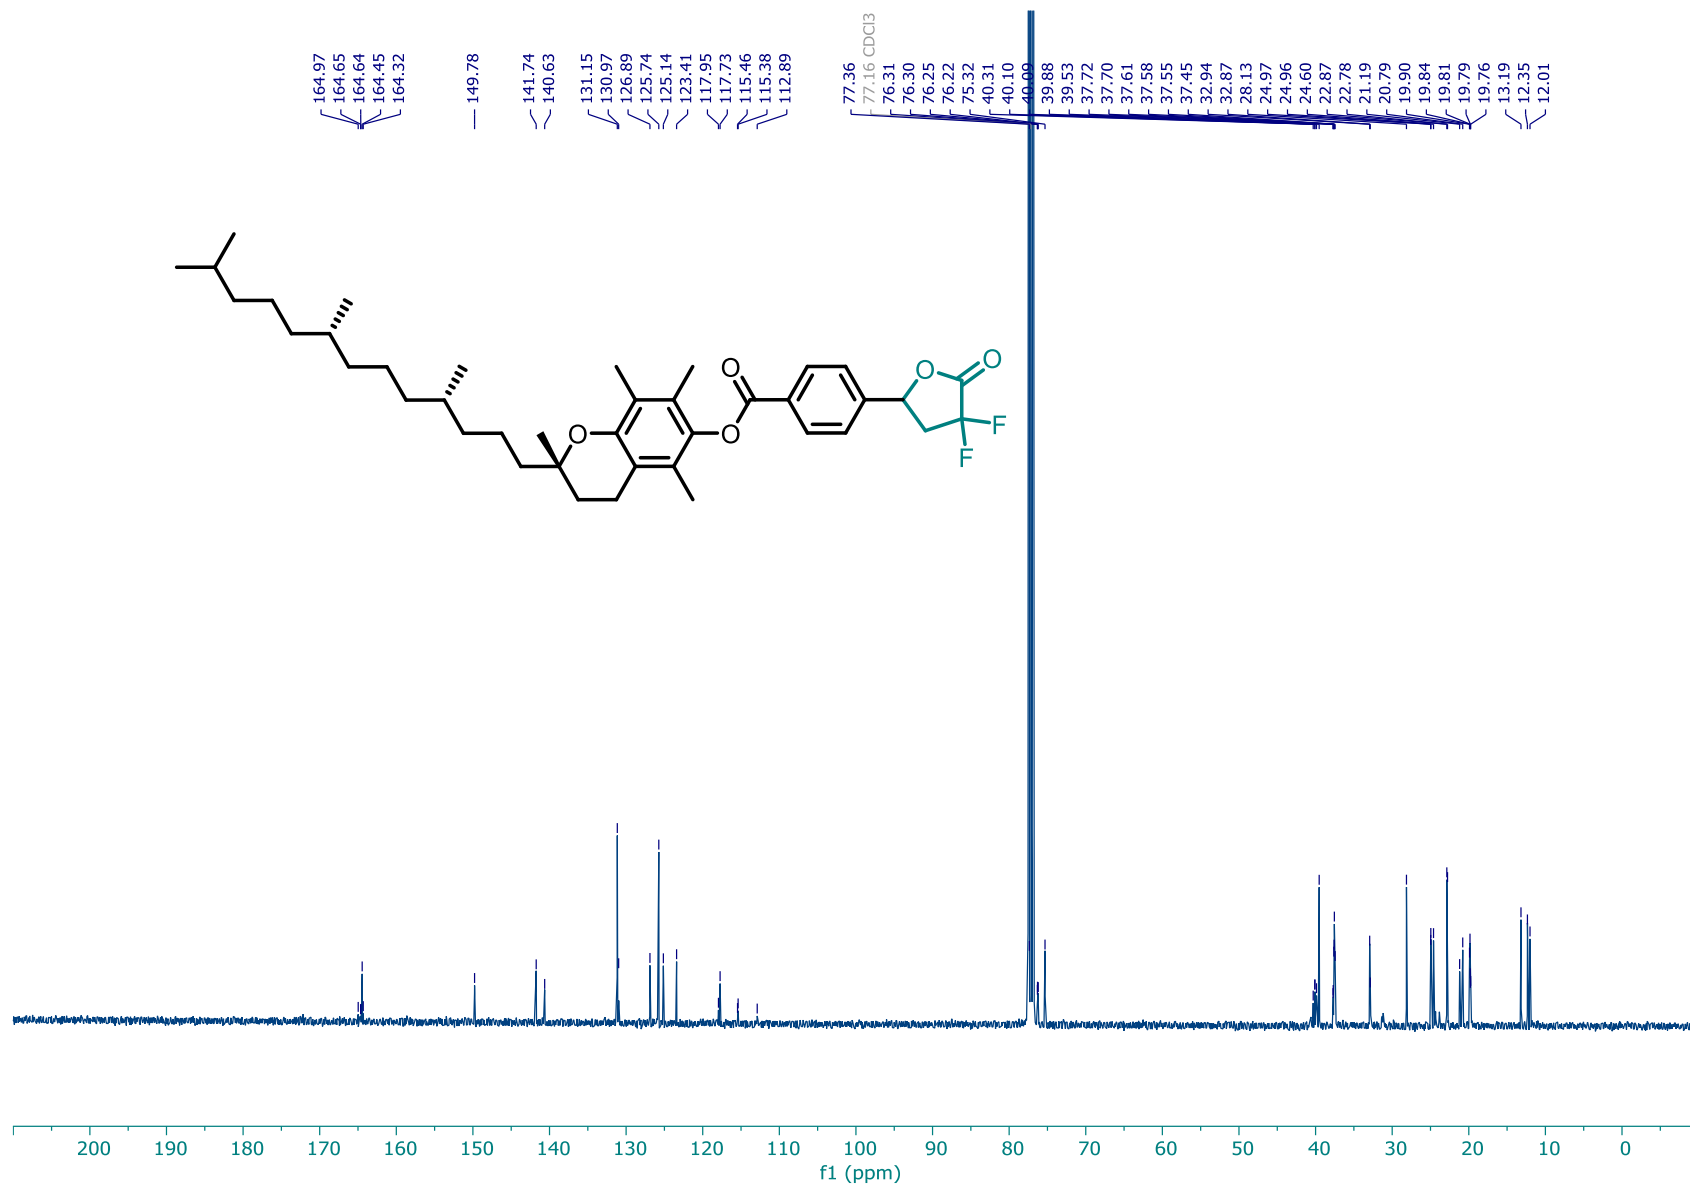

$^{19}\text{F}$  NMR (376 MHz,  $\text{CDCl}_3$ ) of **13**

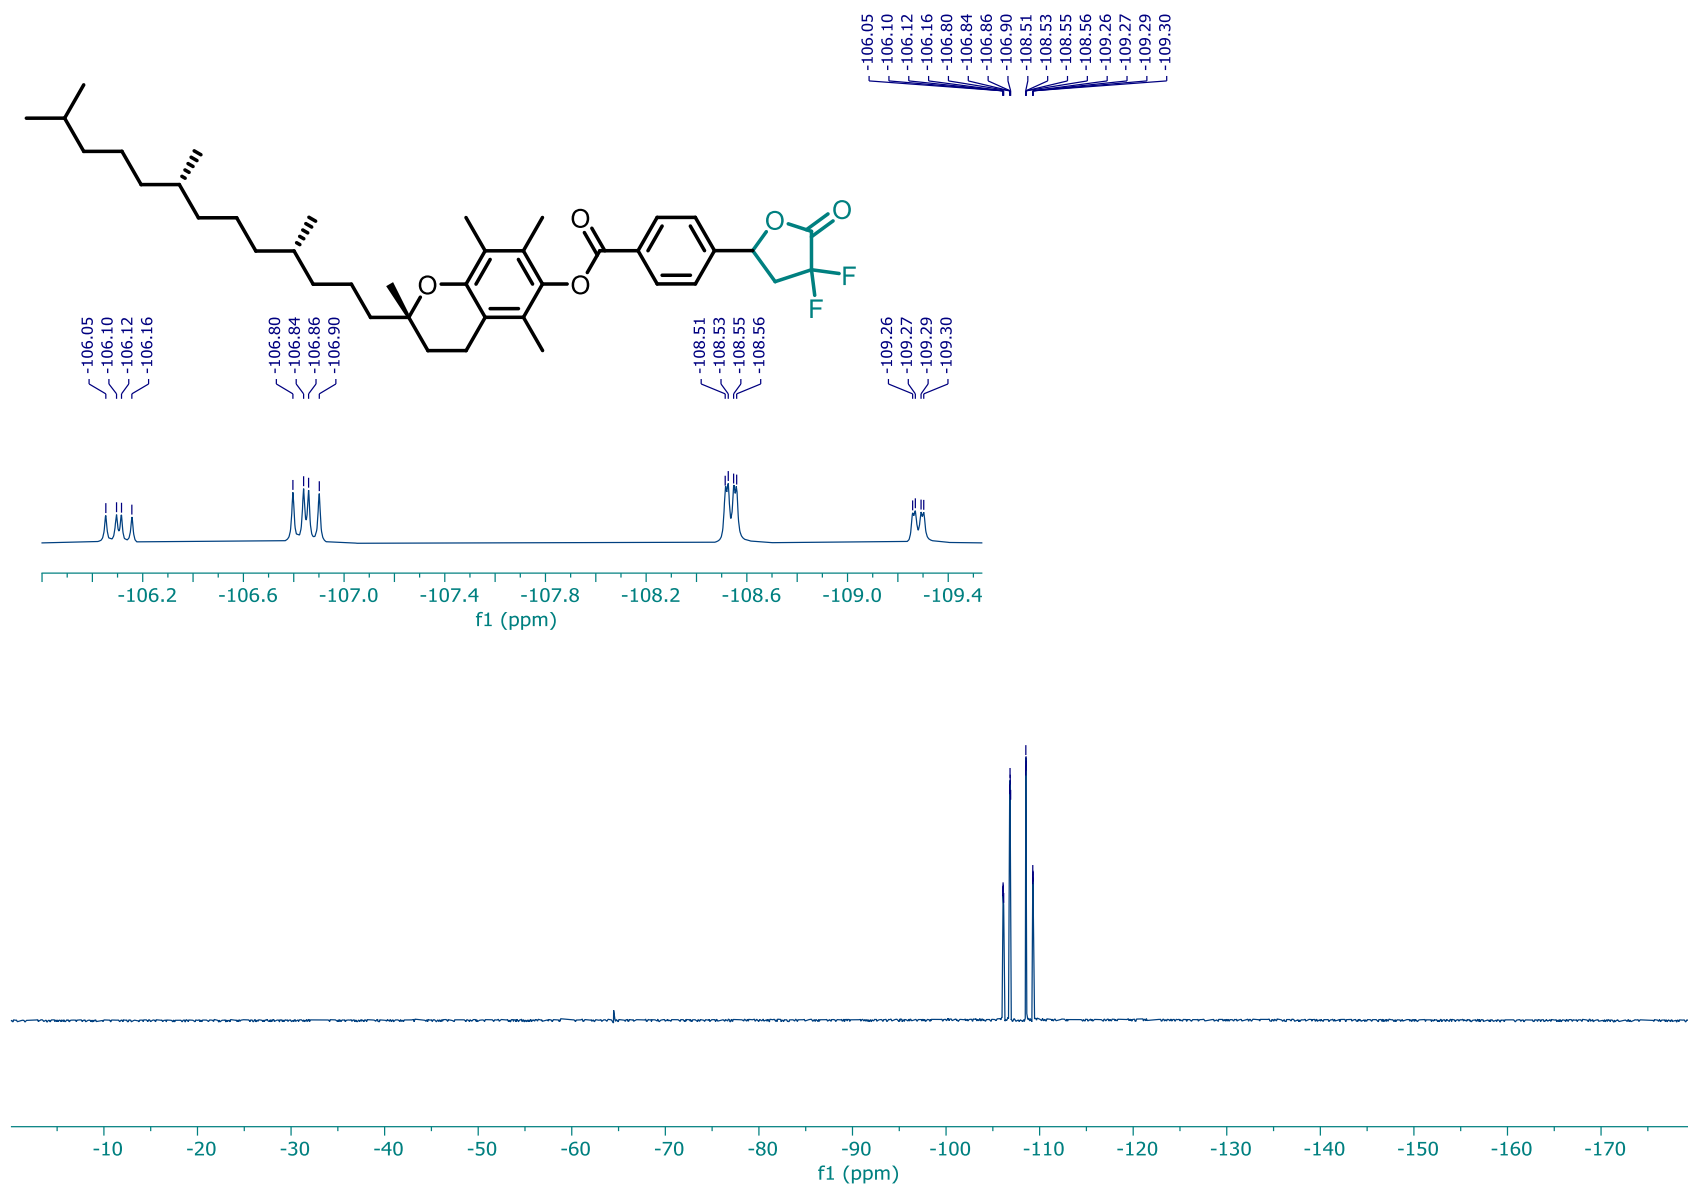

$^1\text{H}$  NMR (300 MHz,  $\text{CDCl}_3$ ) of **14**

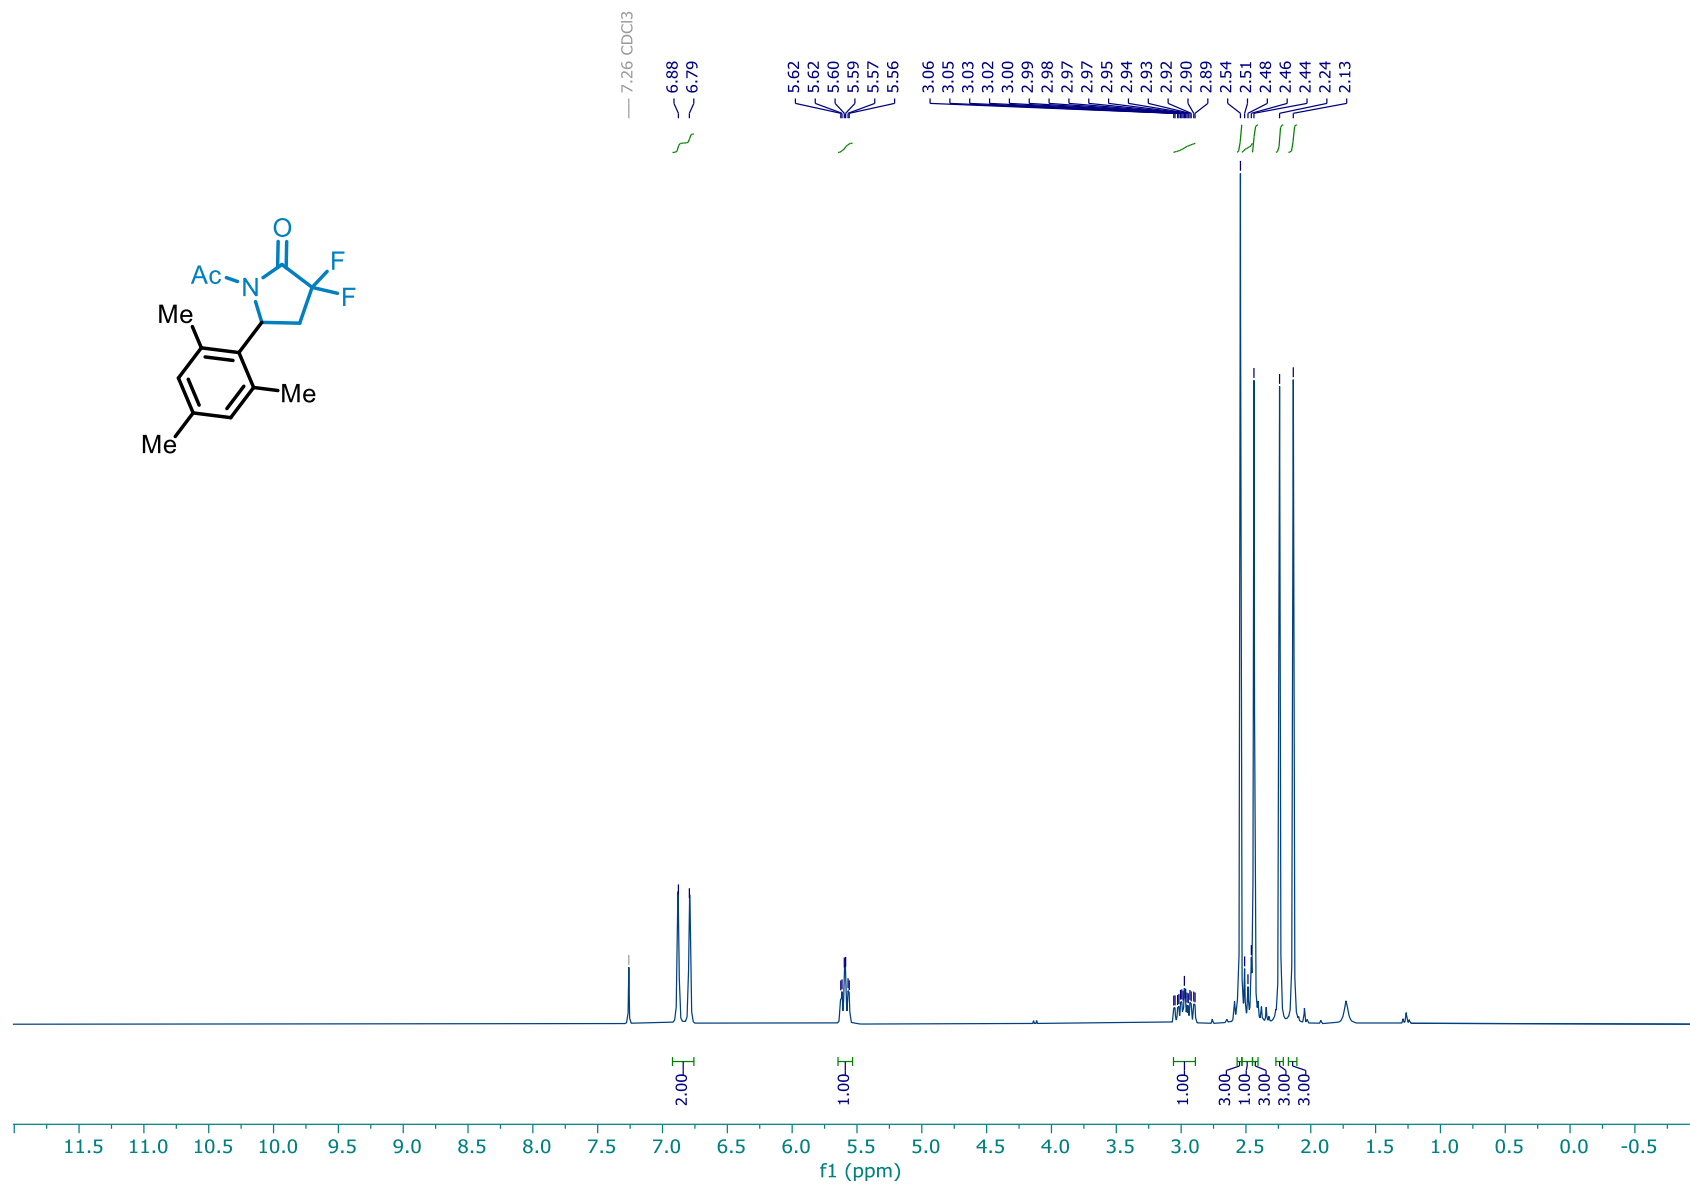

<sup>13</sup>C NMR (75 MHz, CDCl<sub>3</sub>) of **14**

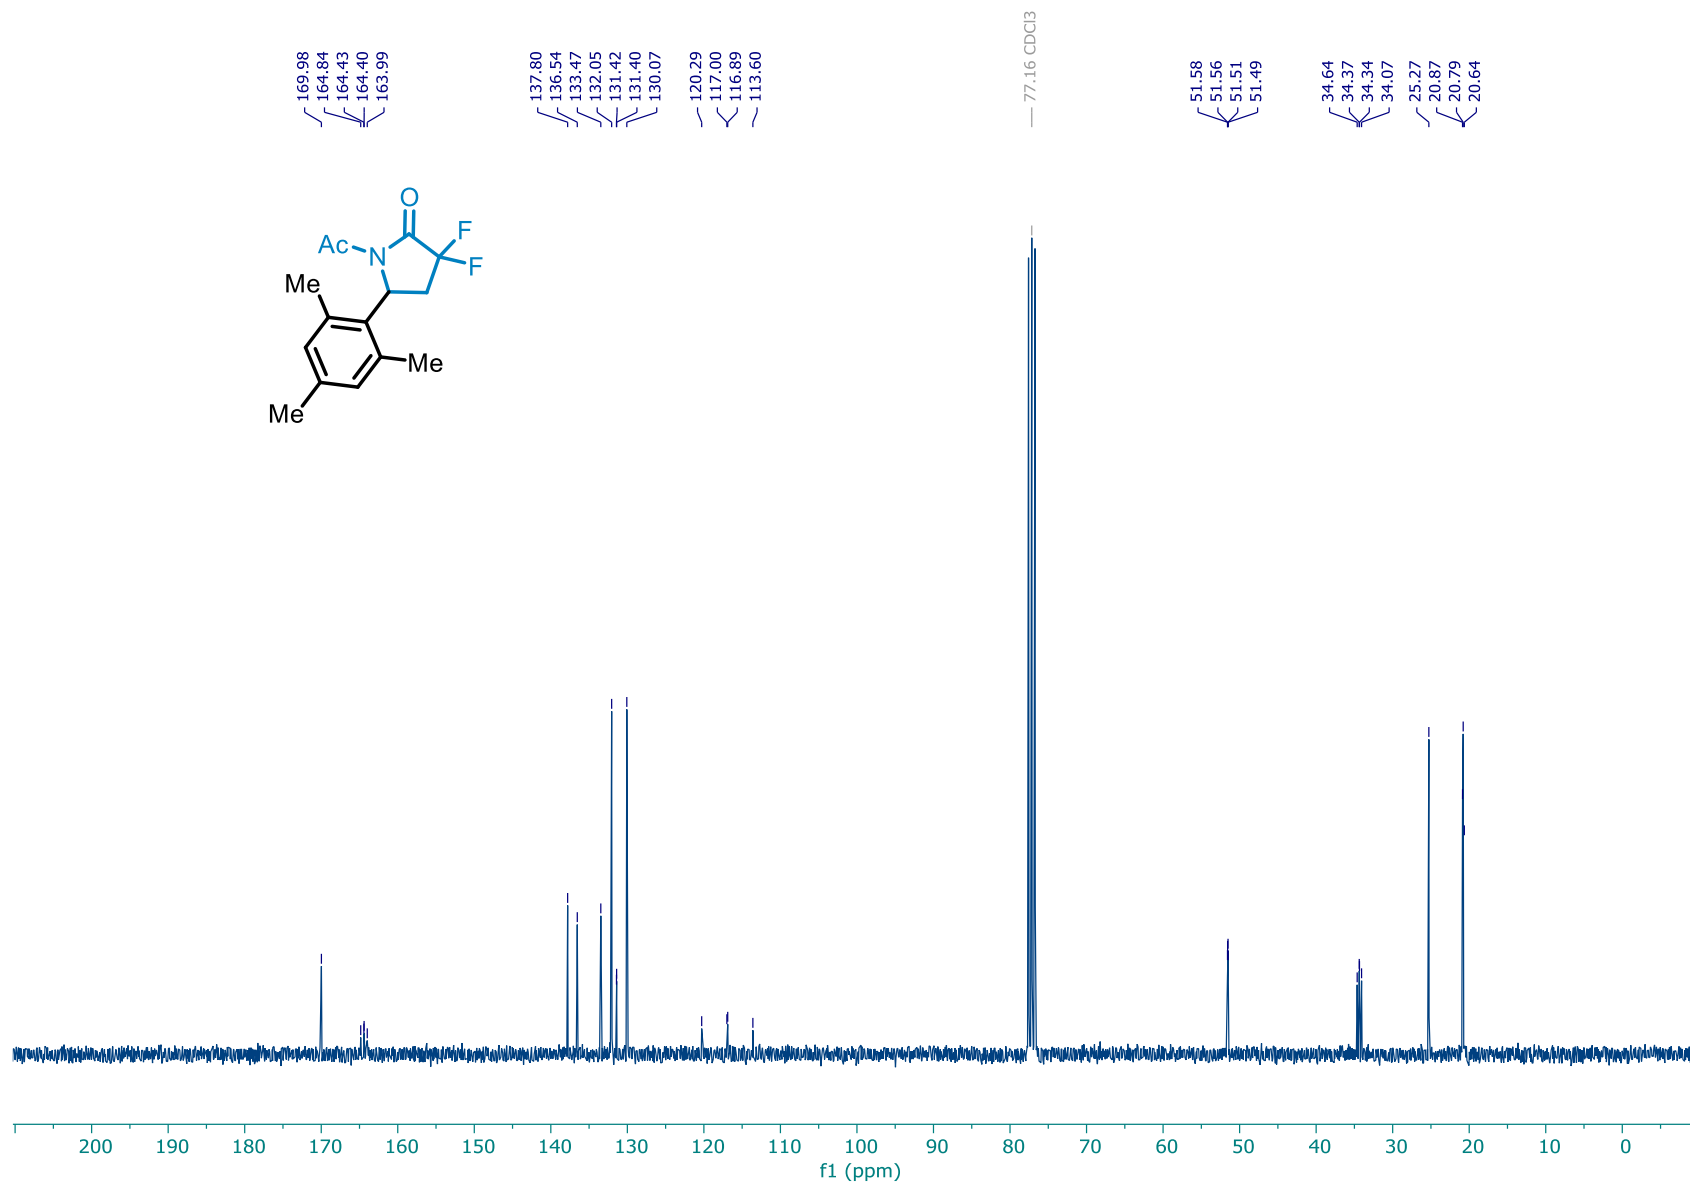

$^{19}\text{F}$  NMR (282 MHz,  $\text{CDCl}_3$ ) of **14**

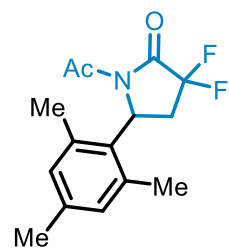

-99.22  
-100.20  
-105.61  
-106.59

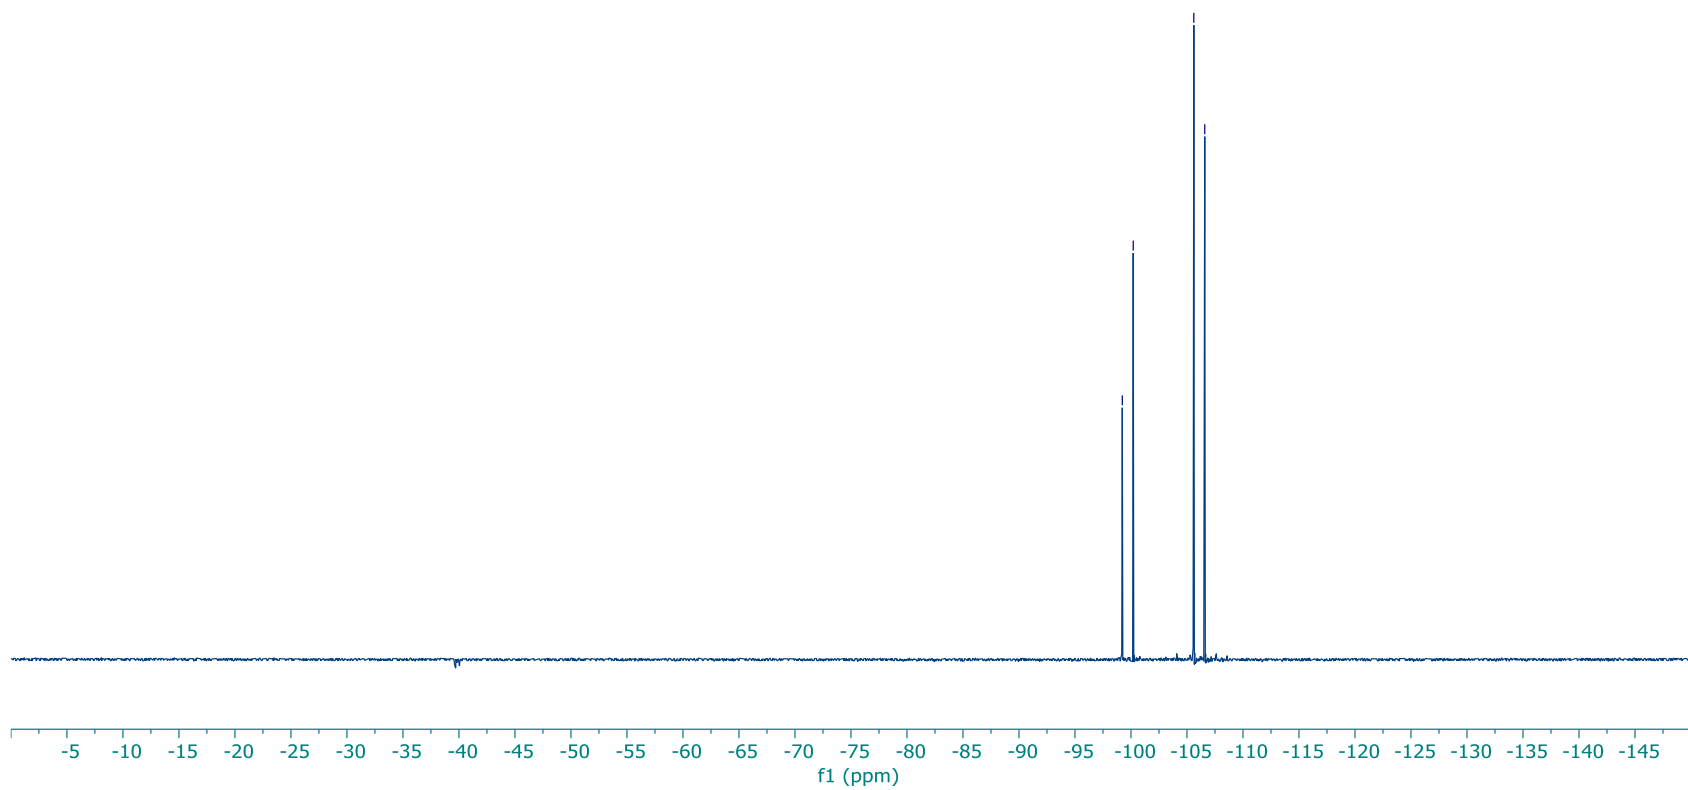

<sup>1</sup>H NMR (300 MHz, CDCl<sub>3</sub>) of **15**

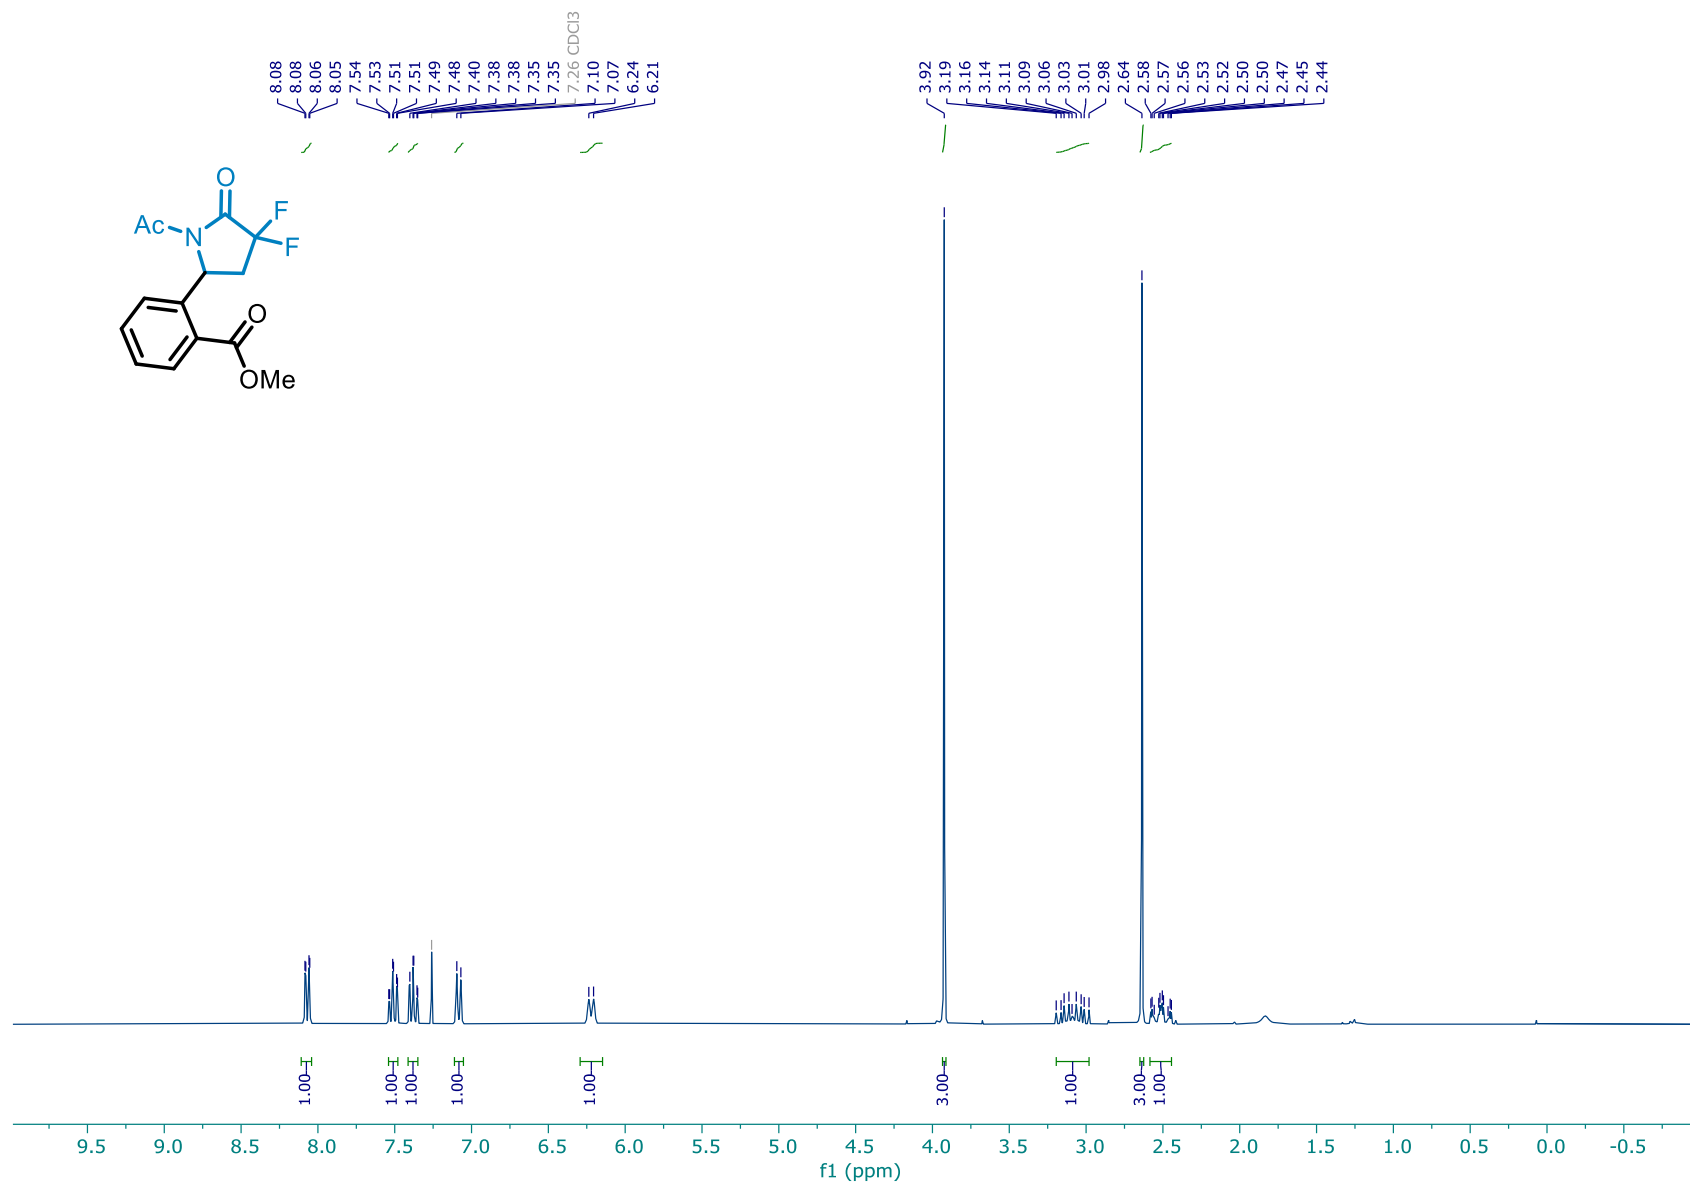

$^{13}\text{C}$  NMR (75 MHz,  $\text{CDCl}_3$ ) of **15**

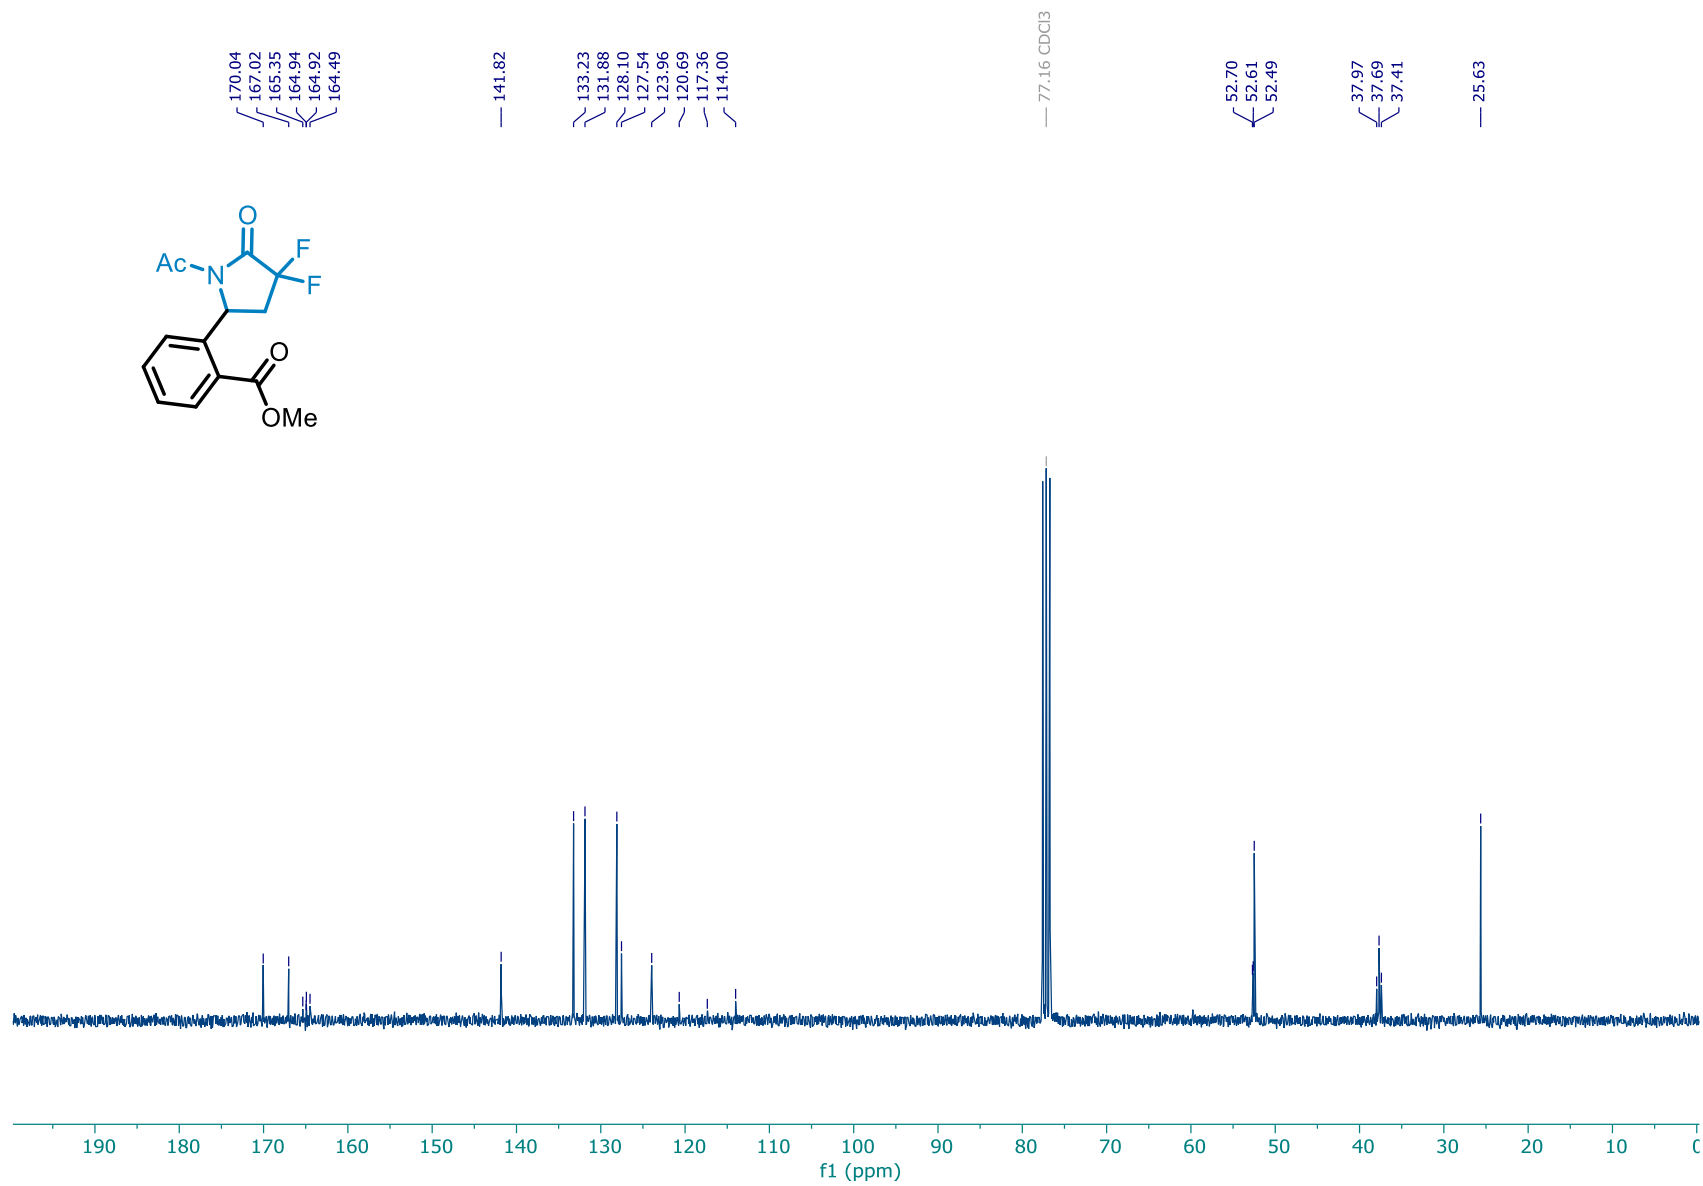

$^{19}\text{F}$  NMR (282 MHz,  $\text{CDCl}_3$ ) of **15**

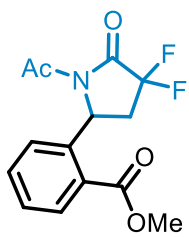

-98.64  
-99.63  
-104.65  
-105.63

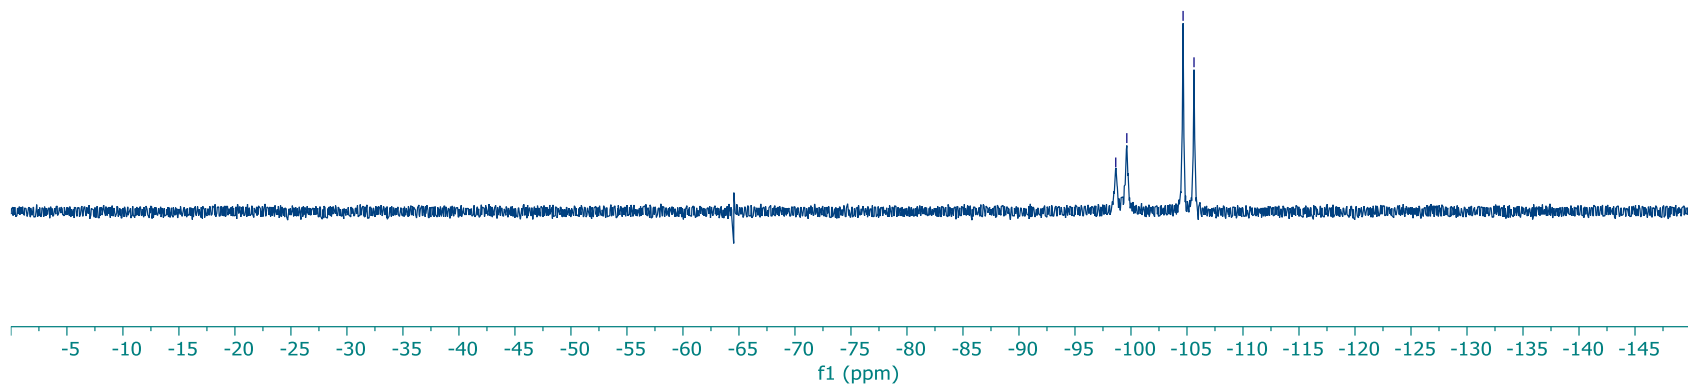



<sup>1</sup>H NMR (400 MHz, CDCl<sub>3</sub>) of **16**

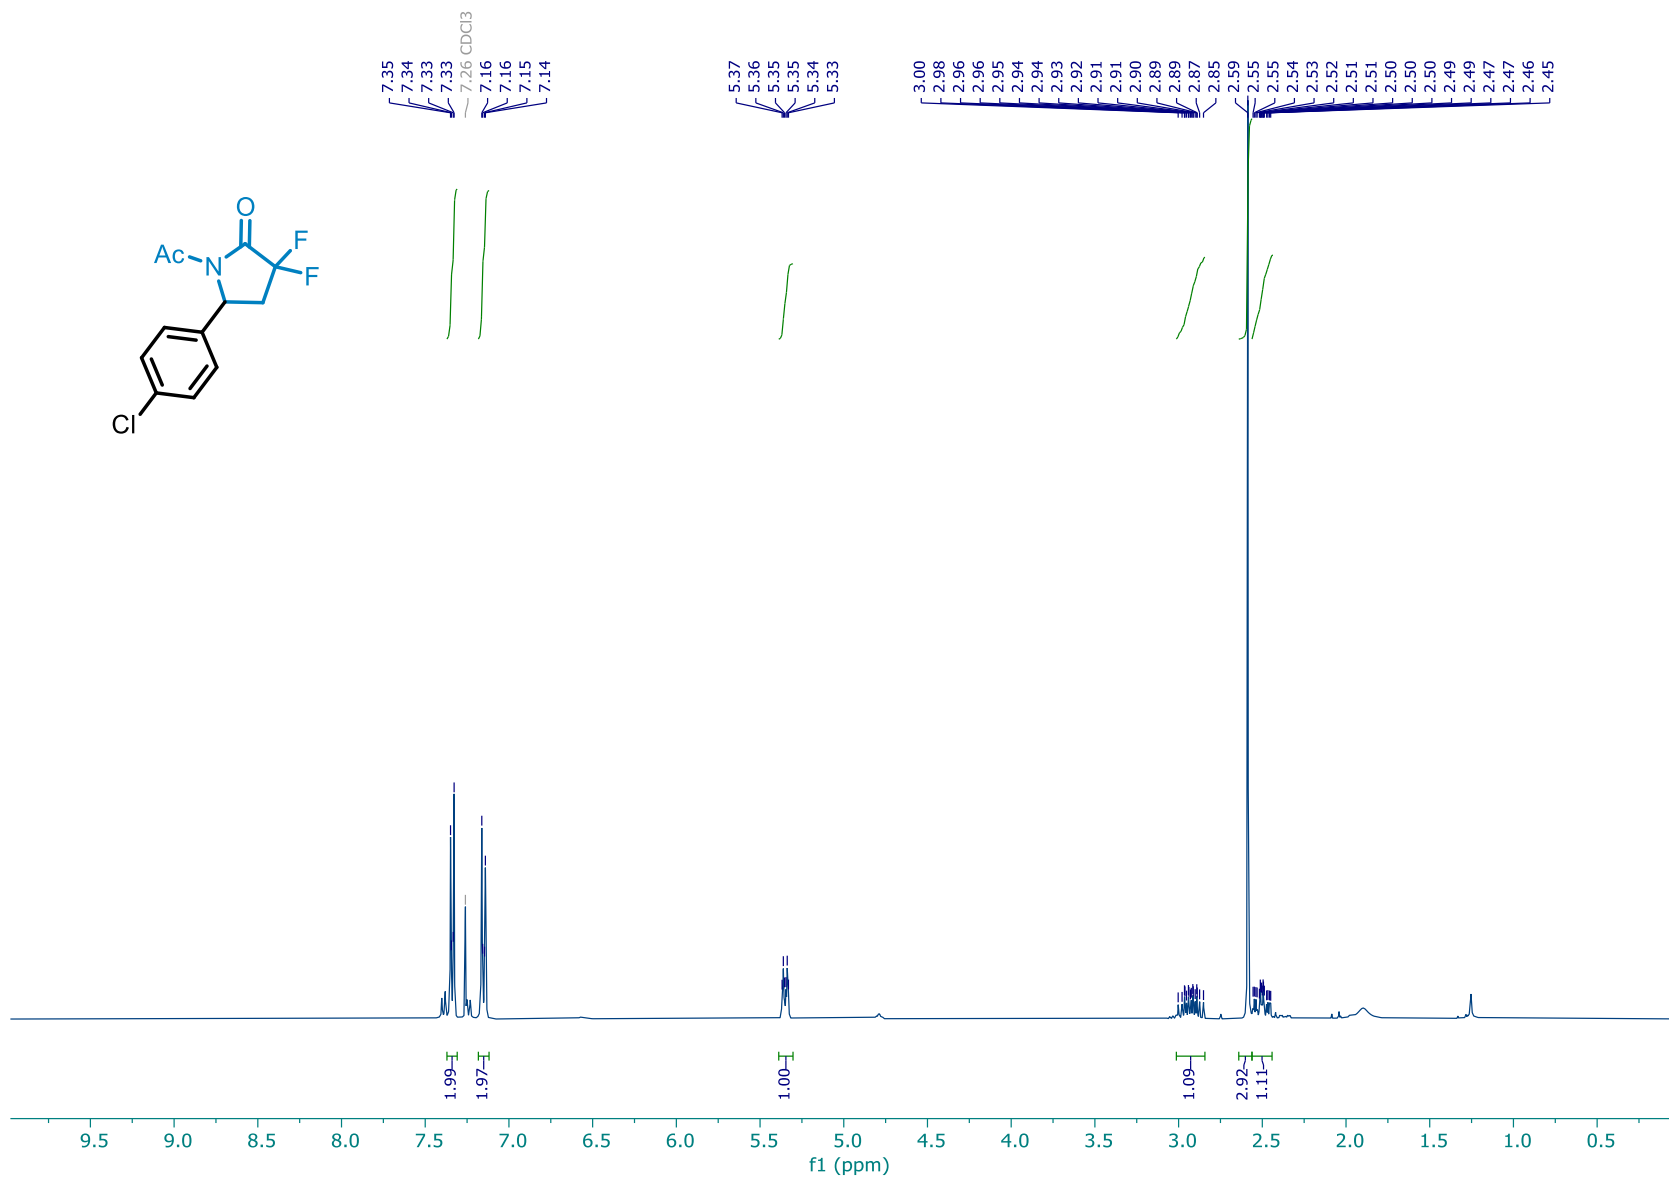

$^{13}\text{C}$  NMR (101 MHz,  $\text{CDCl}_3$ ) of **16**

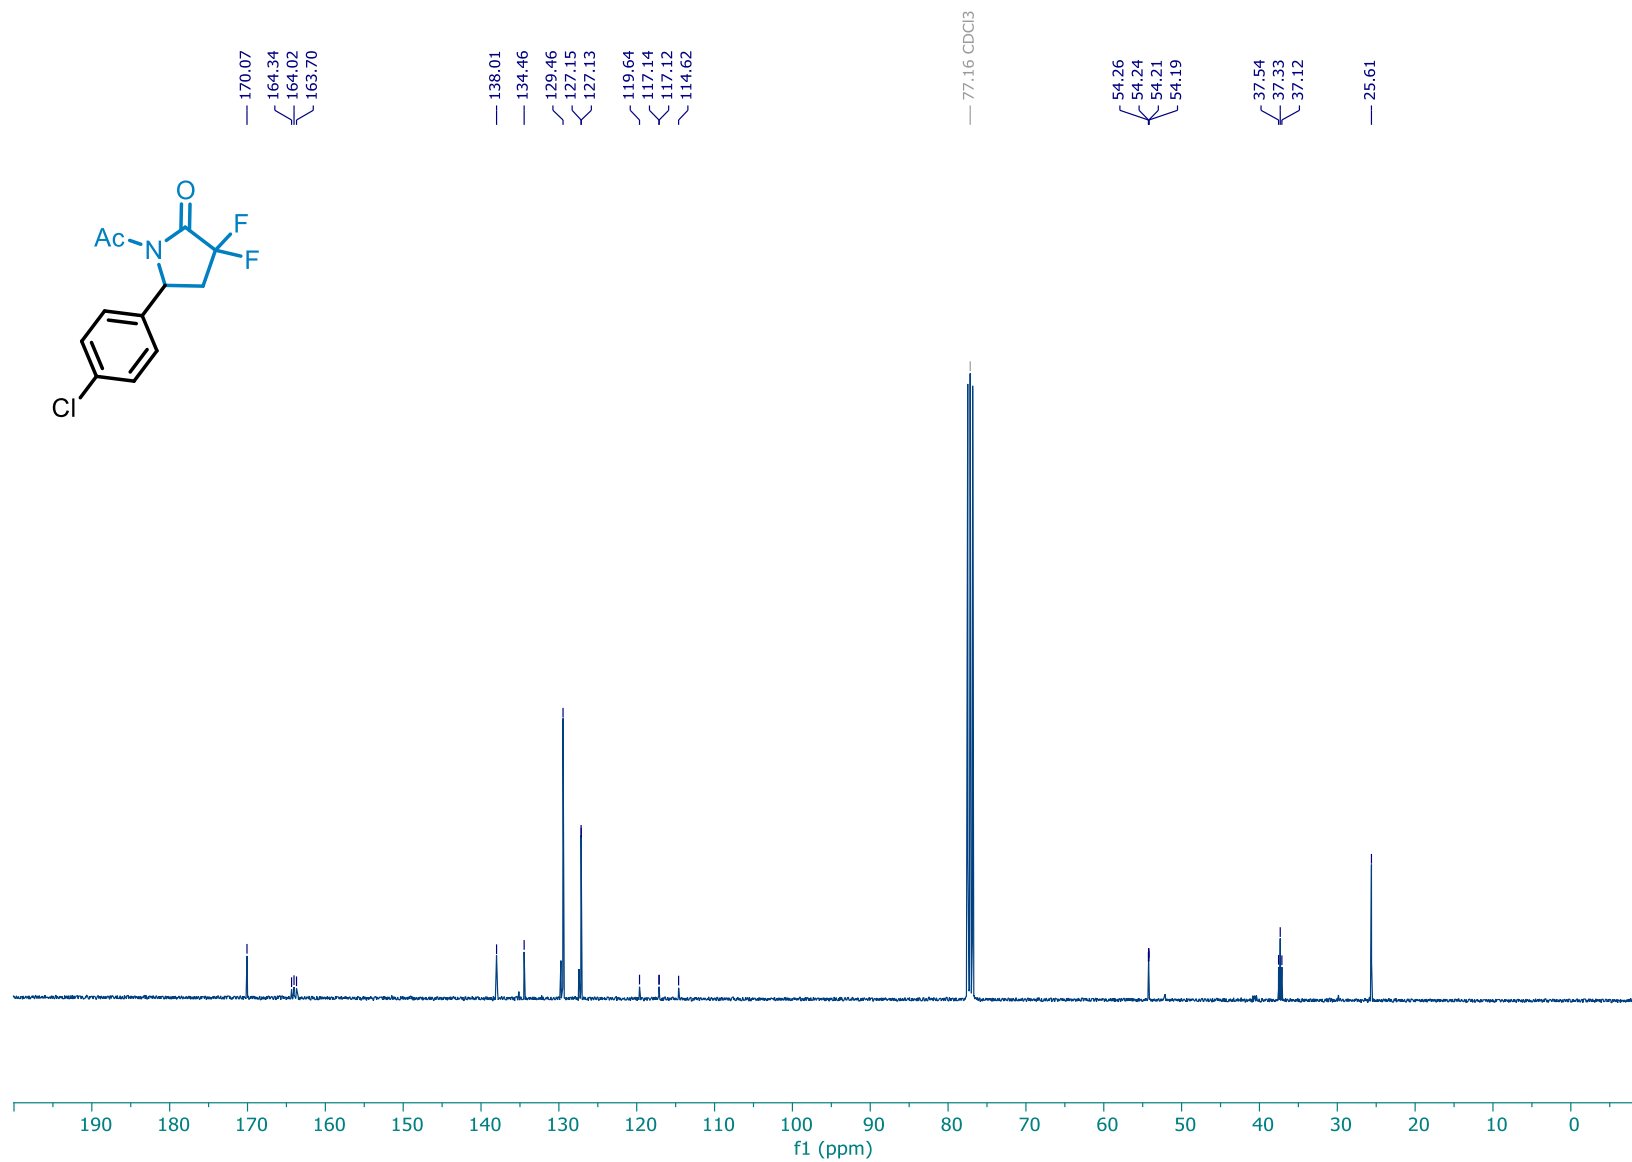

$^{19}\text{F}$  NMR (471 MHz,  $\text{CDCl}_3$ ) of **16**

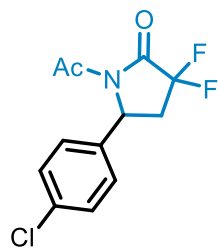

-99.23  
-99.82  
-103.68  
-104.27

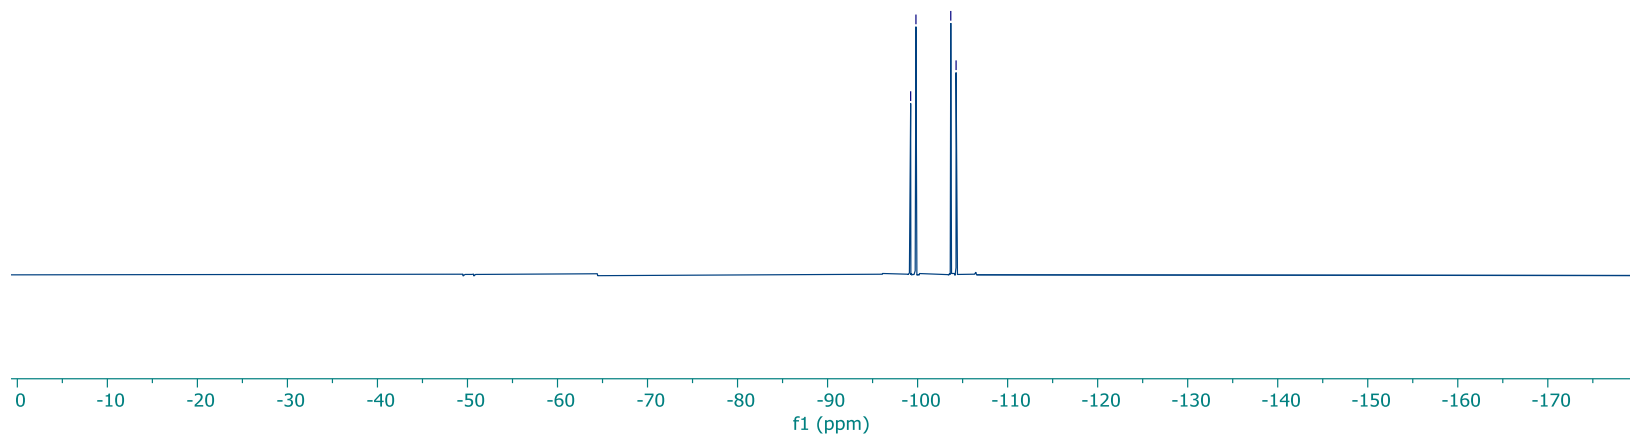

<sup>1</sup>H NMR (500 MHz, CDCl<sub>3</sub>) of **17**

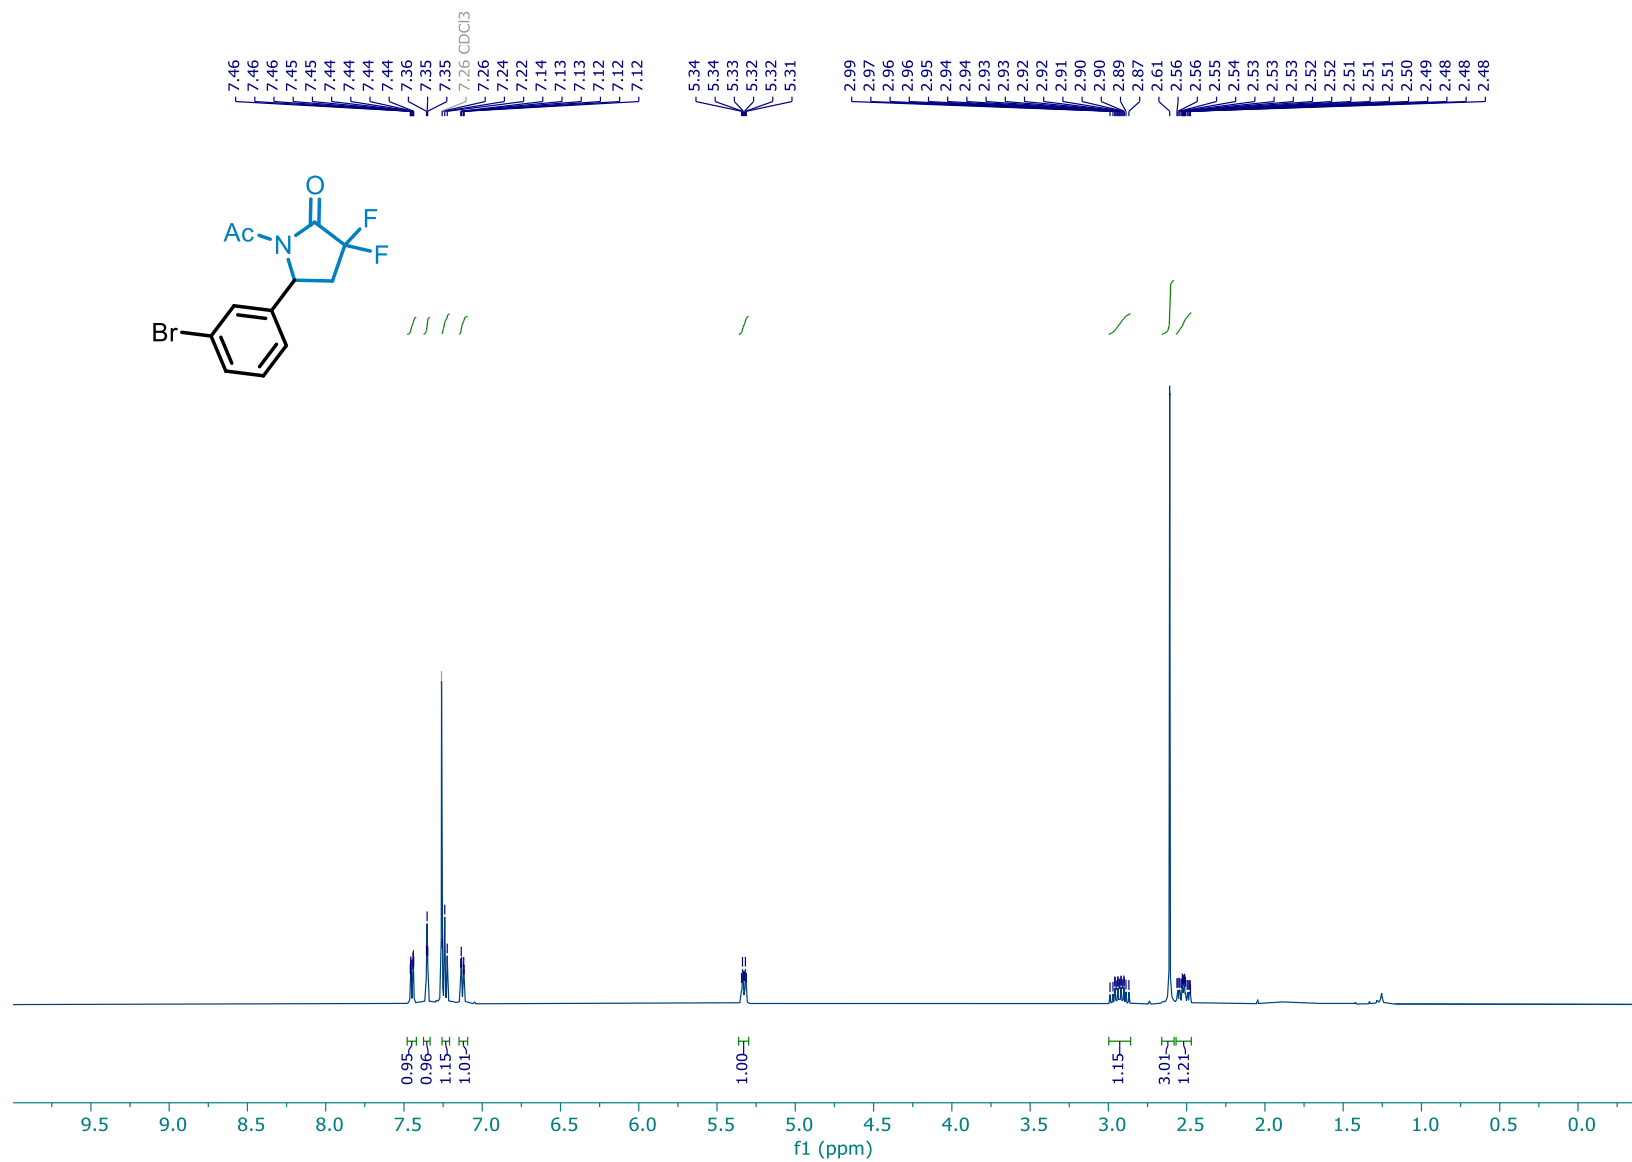

$^{13}\text{C}$  NMR (126 MHz,  $\text{CDCl}_3$ ) of **17**

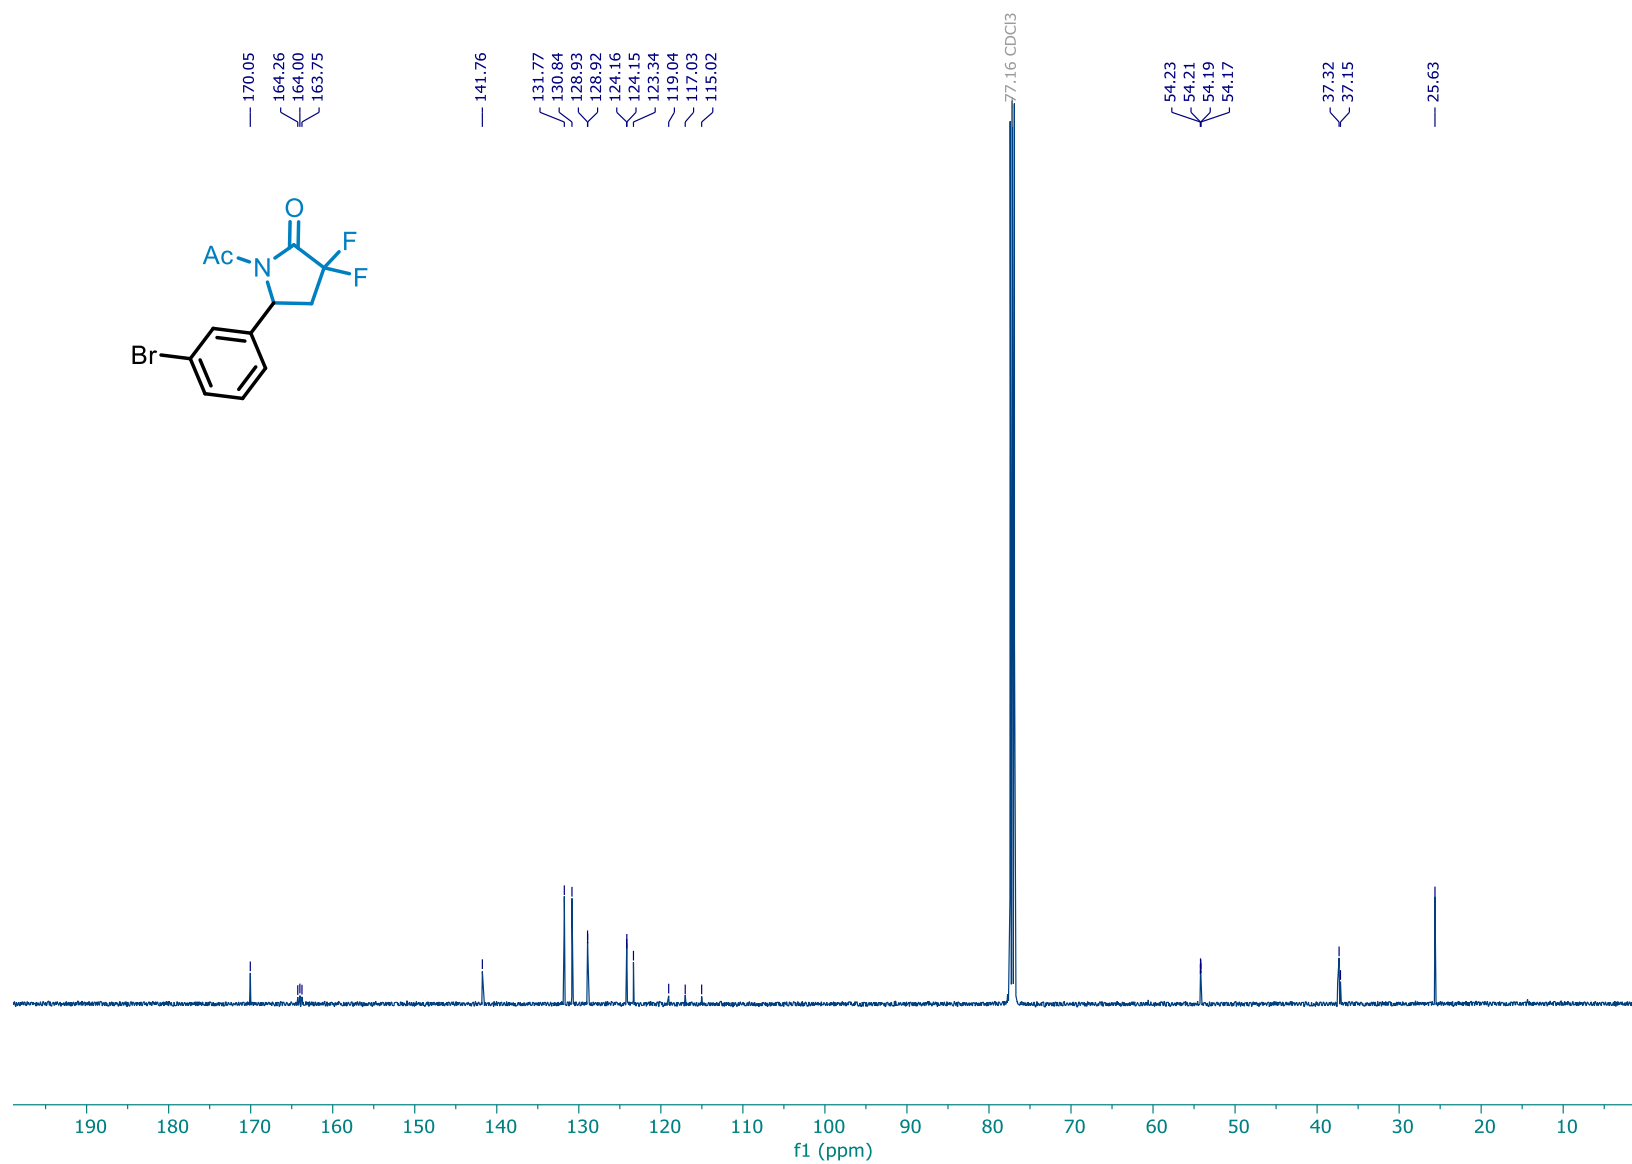

$^{19}\text{F}$  NMR (471 MHz,  $\text{CDCl}_3$ ) of **17**

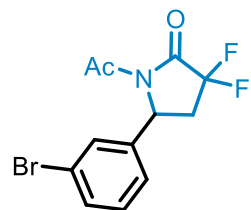

-99.35  
-99.94  
-103.68  
-104.27

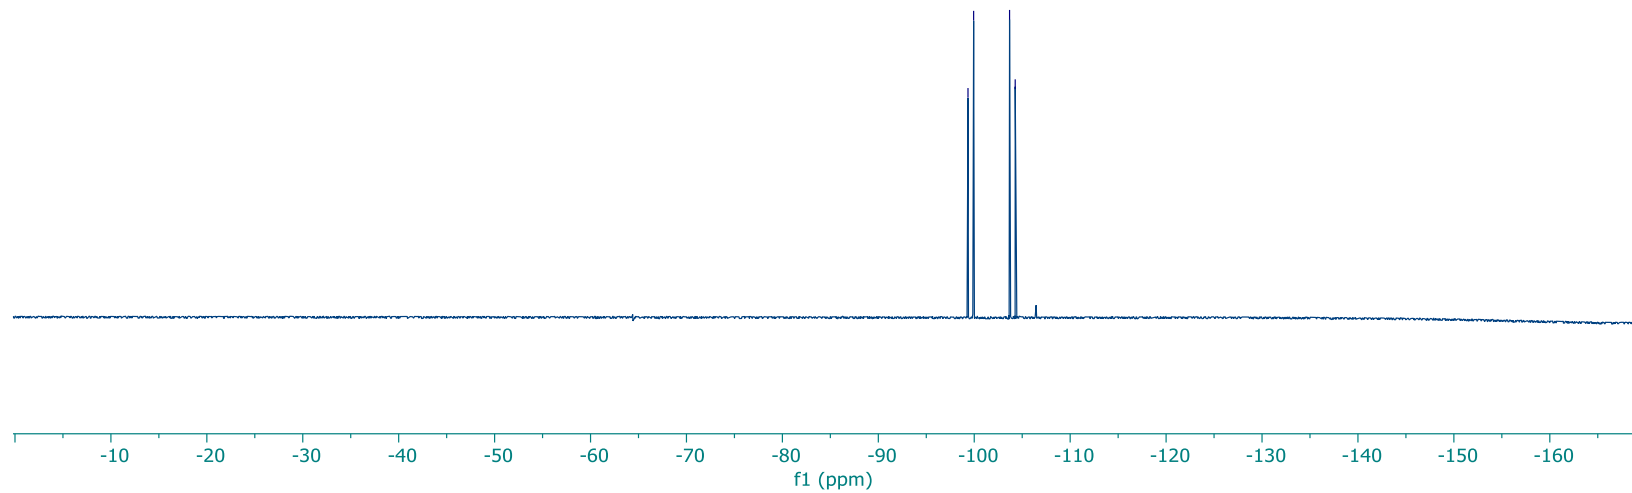

$^1\text{H}$  NMR (500 MHz,  $\text{CDCl}_3$ ) of **18**

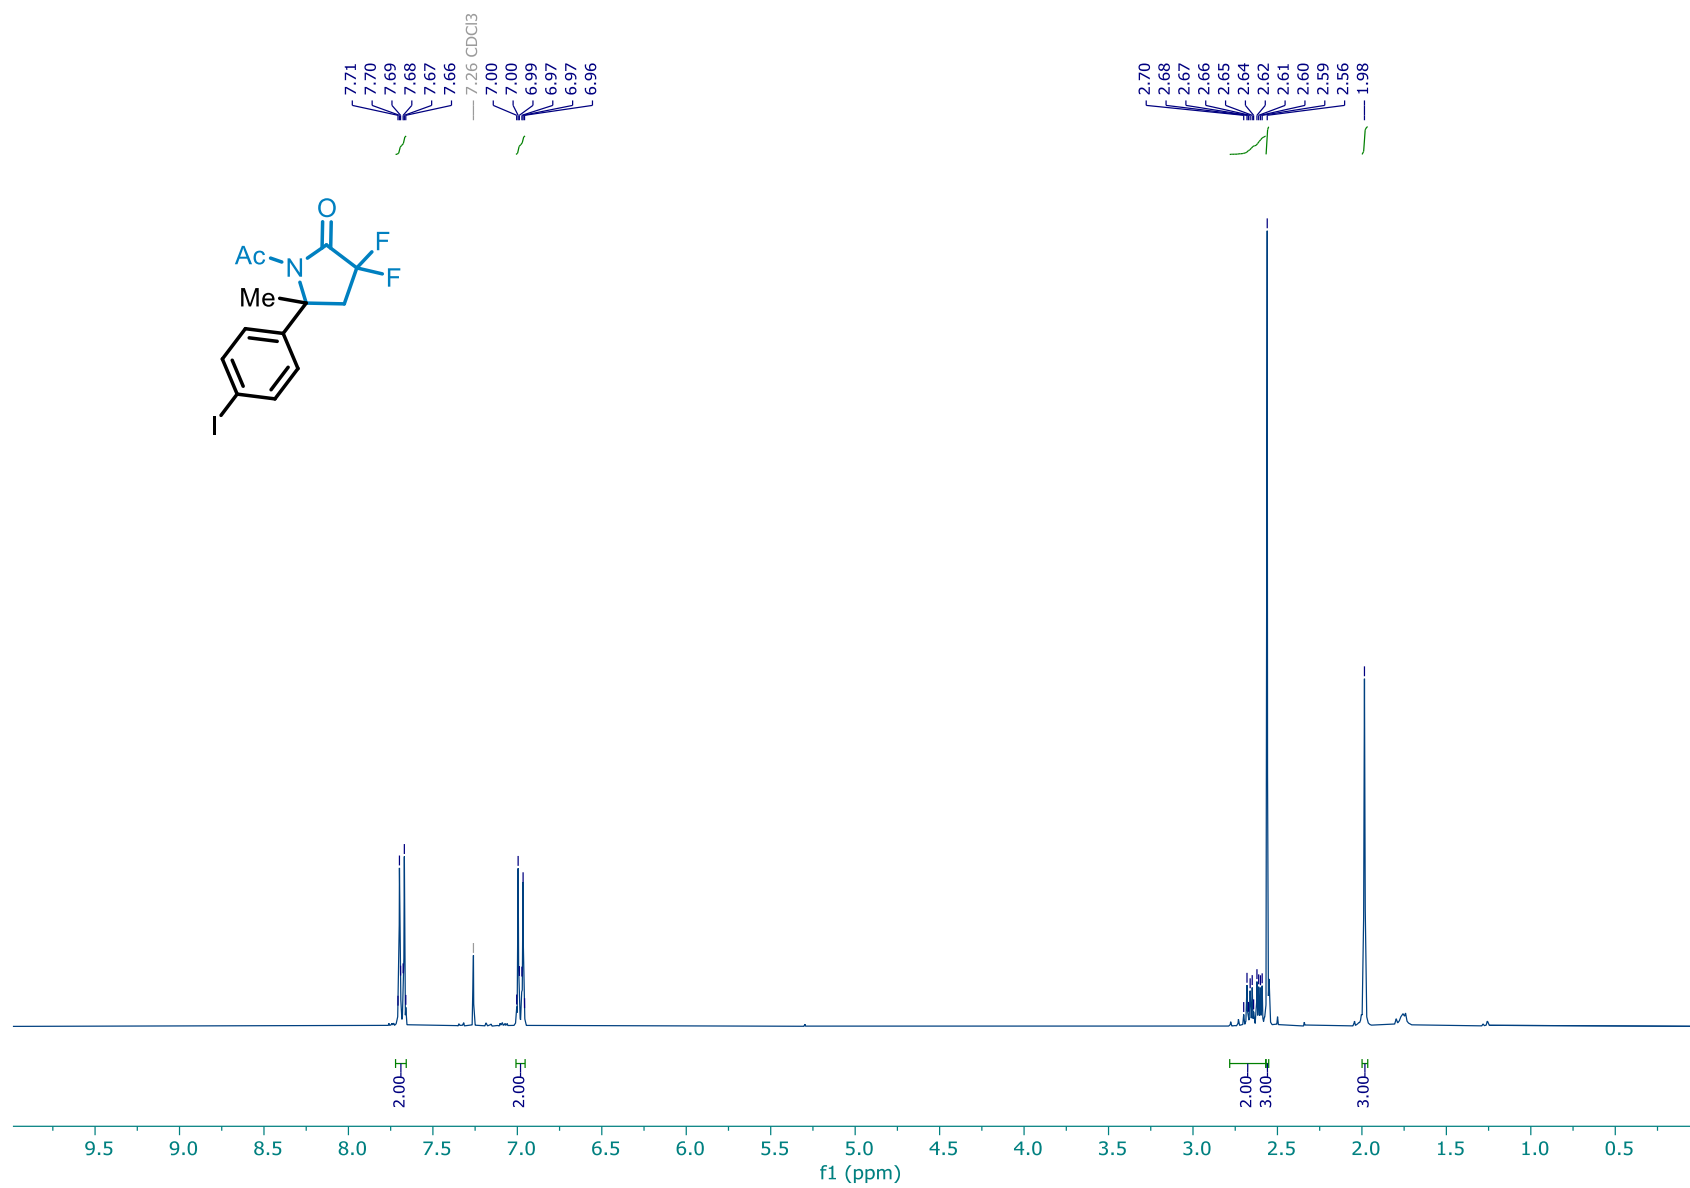

$^{13}\text{C}$  NMR (75 MHz,  $\text{CDCl}_3$ ) of **18**

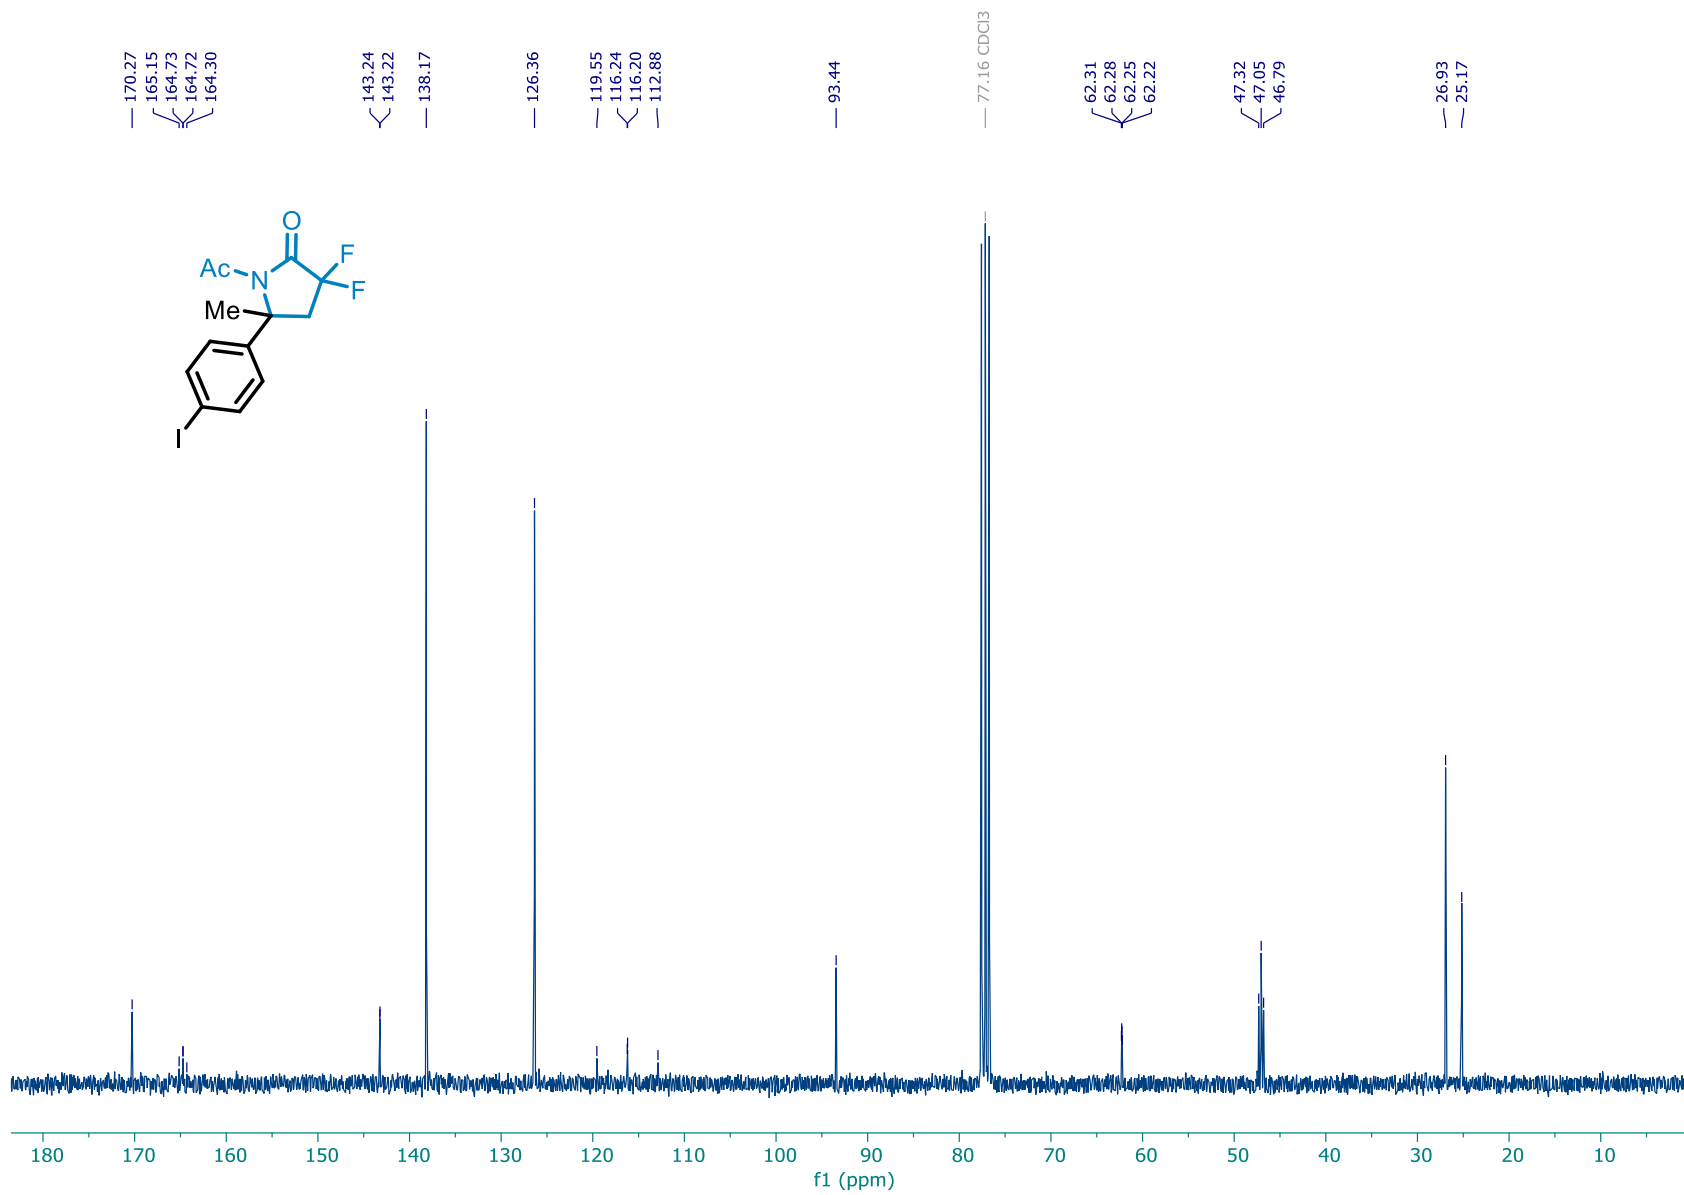



$^{19}\text{F}$  NMR (282 MHz,  $\text{CDCl}_3$ ) of **18**

-100.92  
-101.90  
-103.34  
-104.32

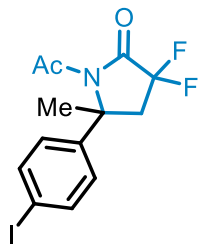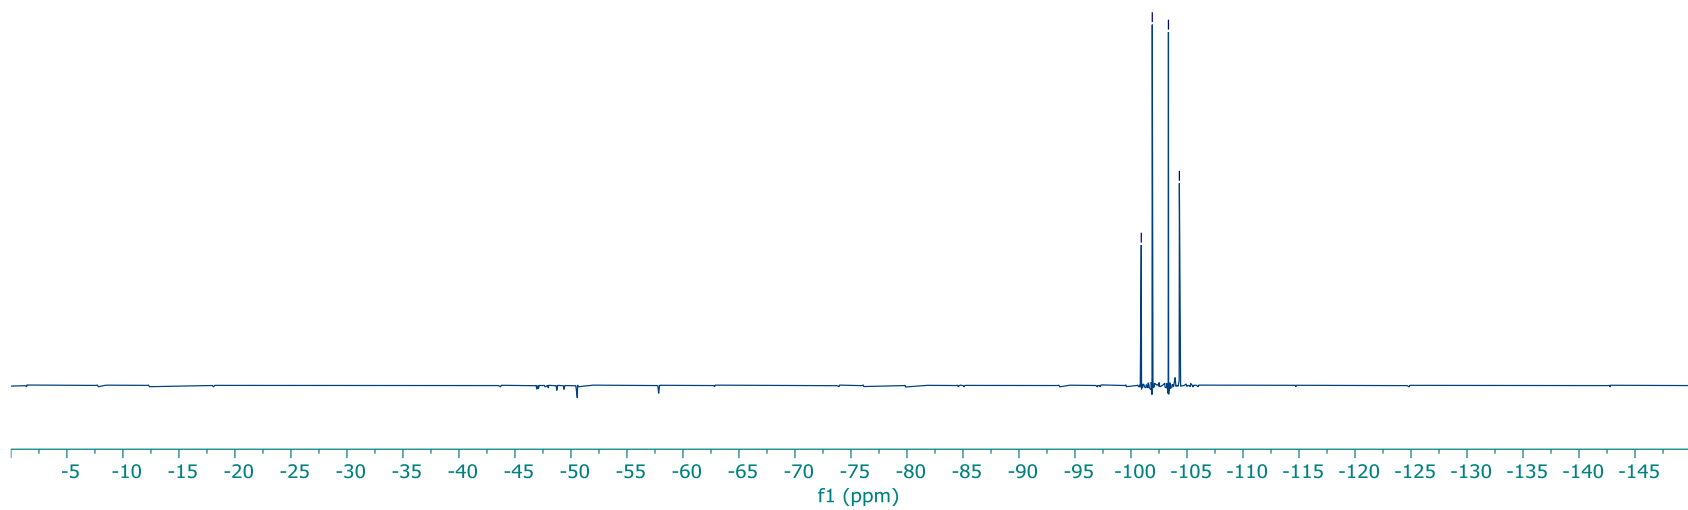

<sup>1</sup>H NMR (300 MHz, CDCl<sub>3</sub>) of **19**

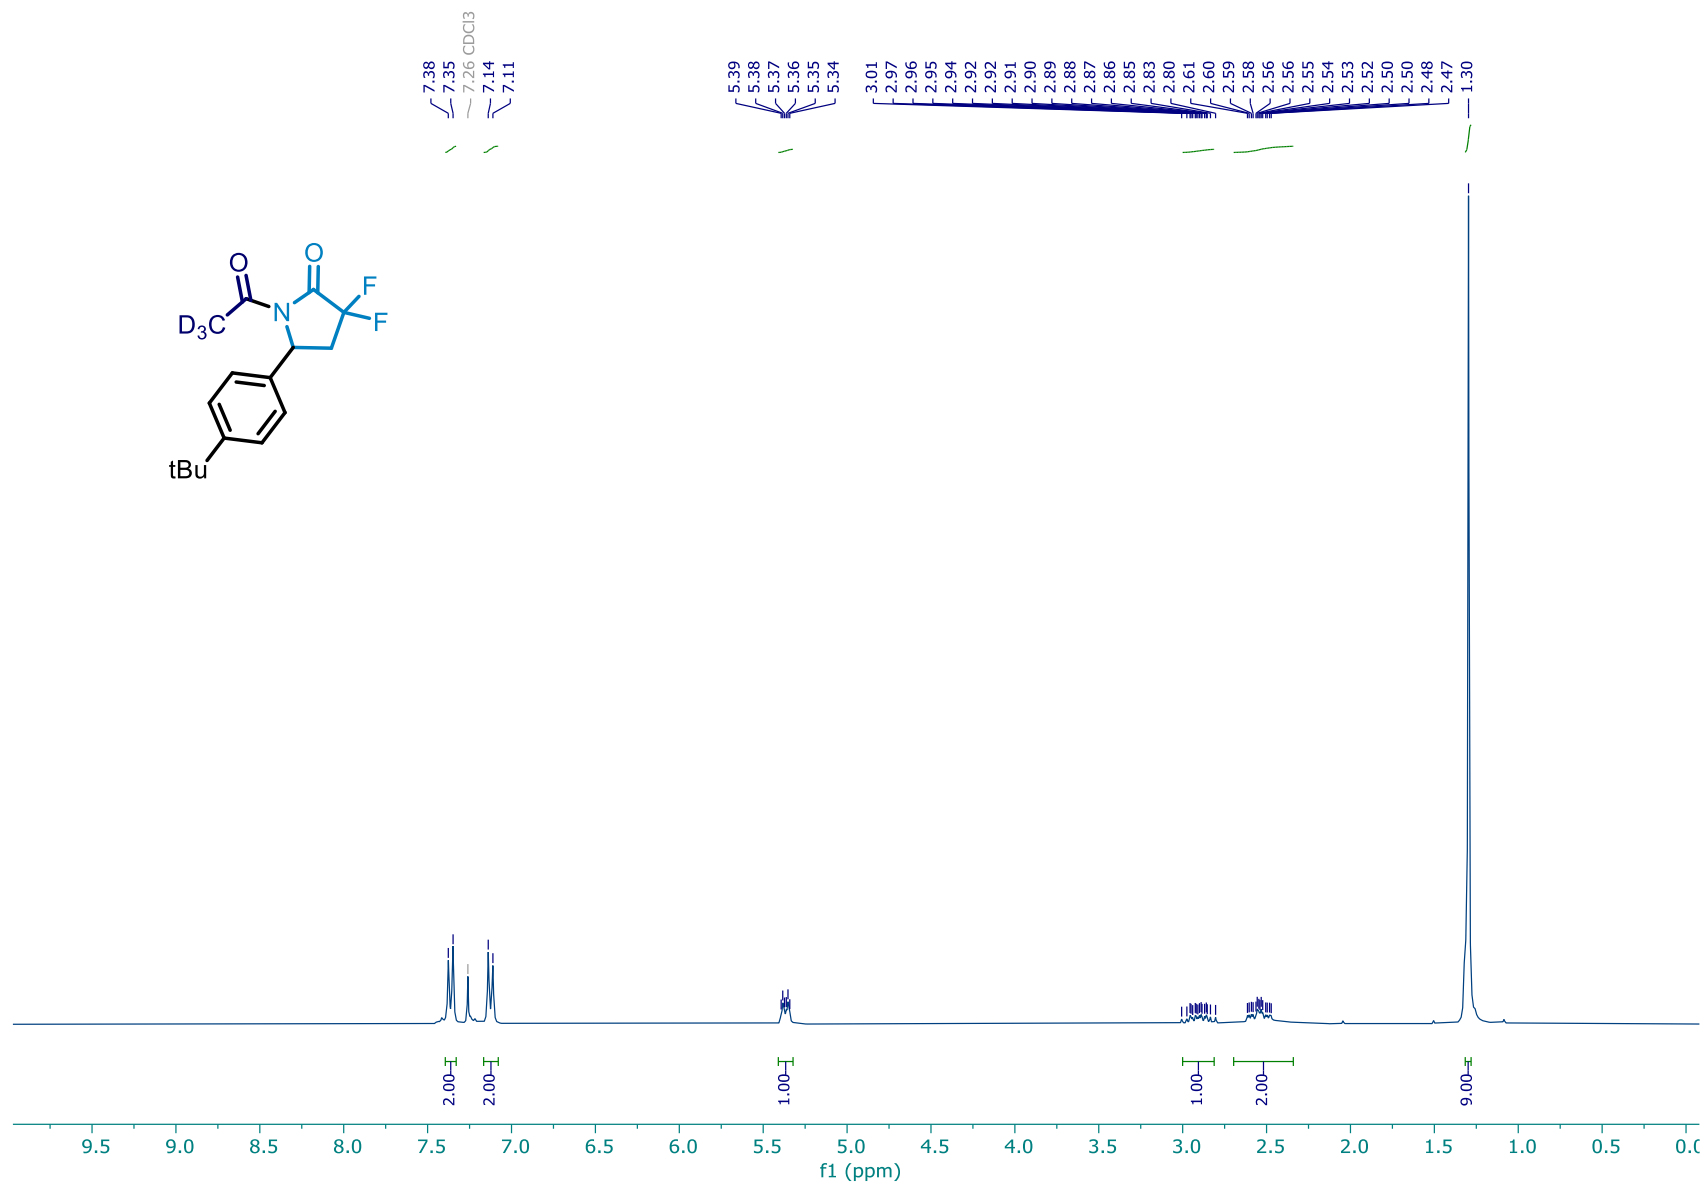

<sup>13</sup>C NMR (75 MHz, CDCl<sub>3</sub>) of **19**

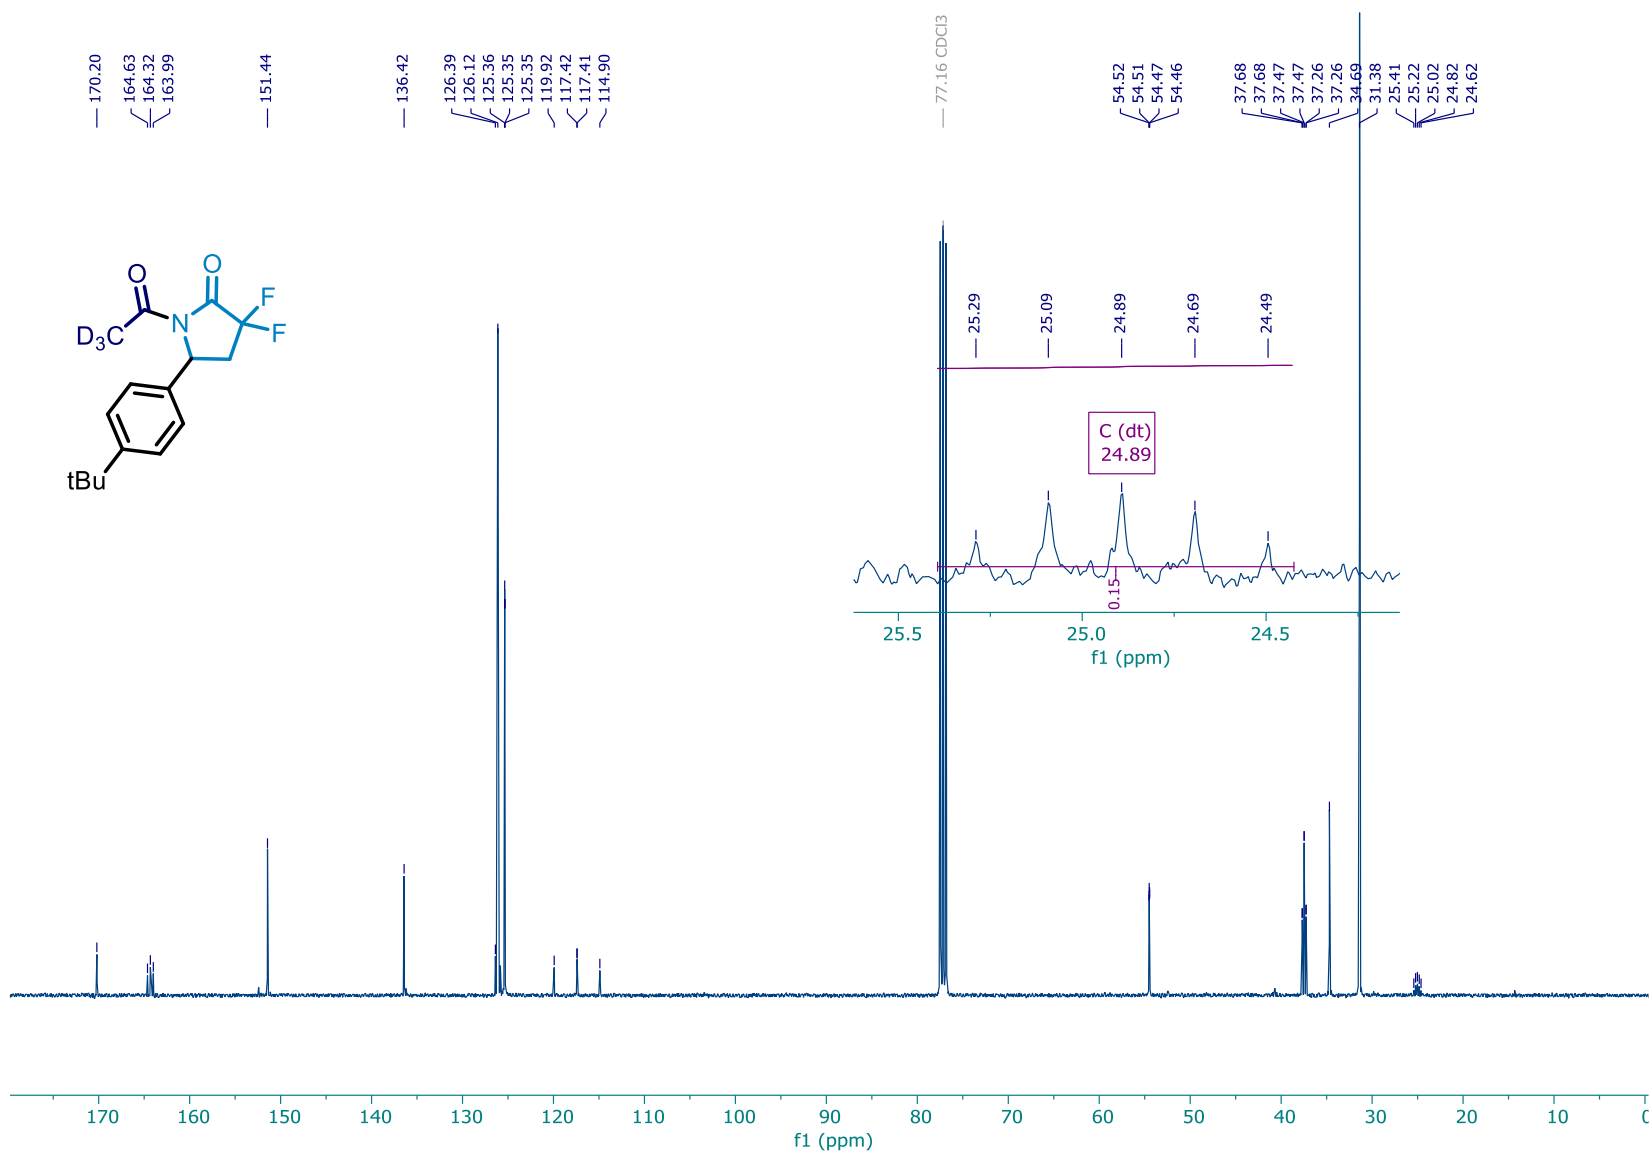

$^{19}\text{F}$  NMR (282 MHz,  $\text{CDCl}_3$ ) of **19**

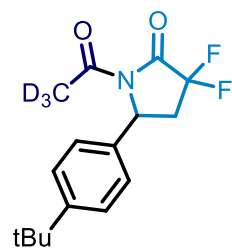

-99.15  
-100.13  
-103.10  
-104.07

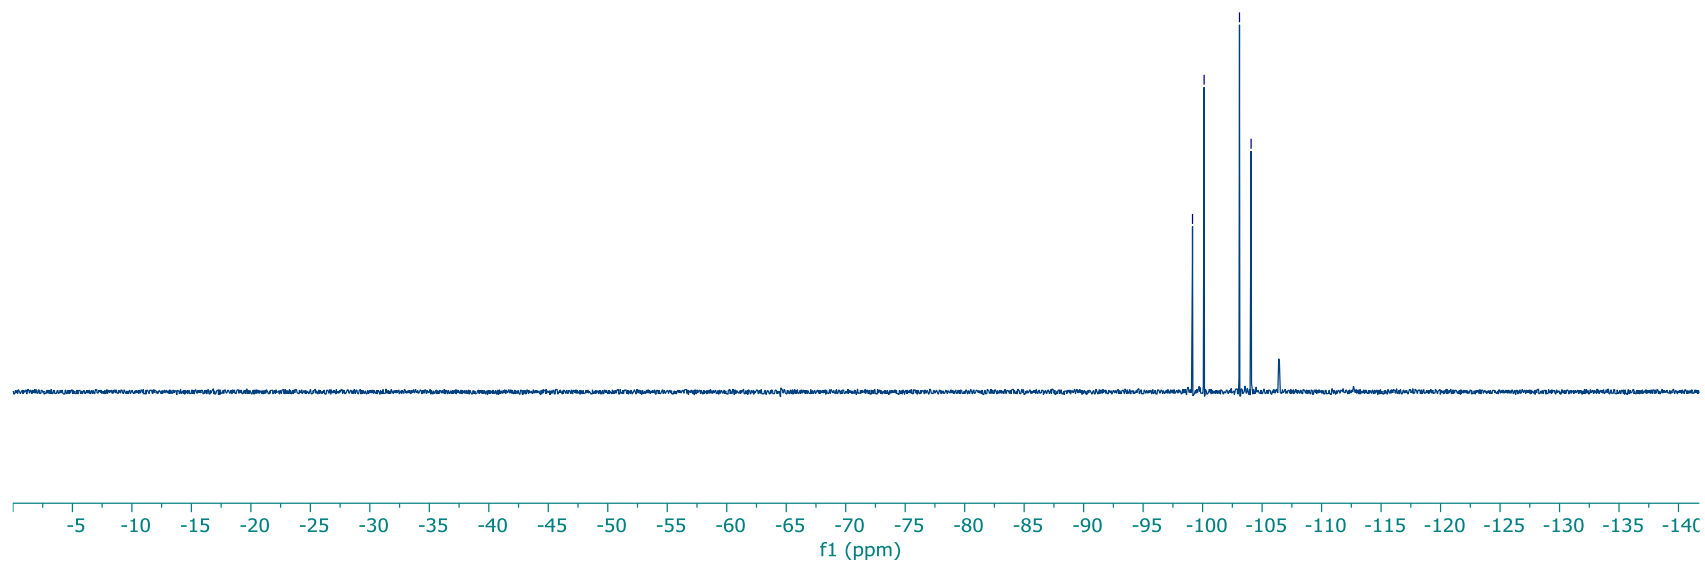

<sup>1</sup>H NMR (400 MHz, CDCl<sub>3</sub>) of **20**

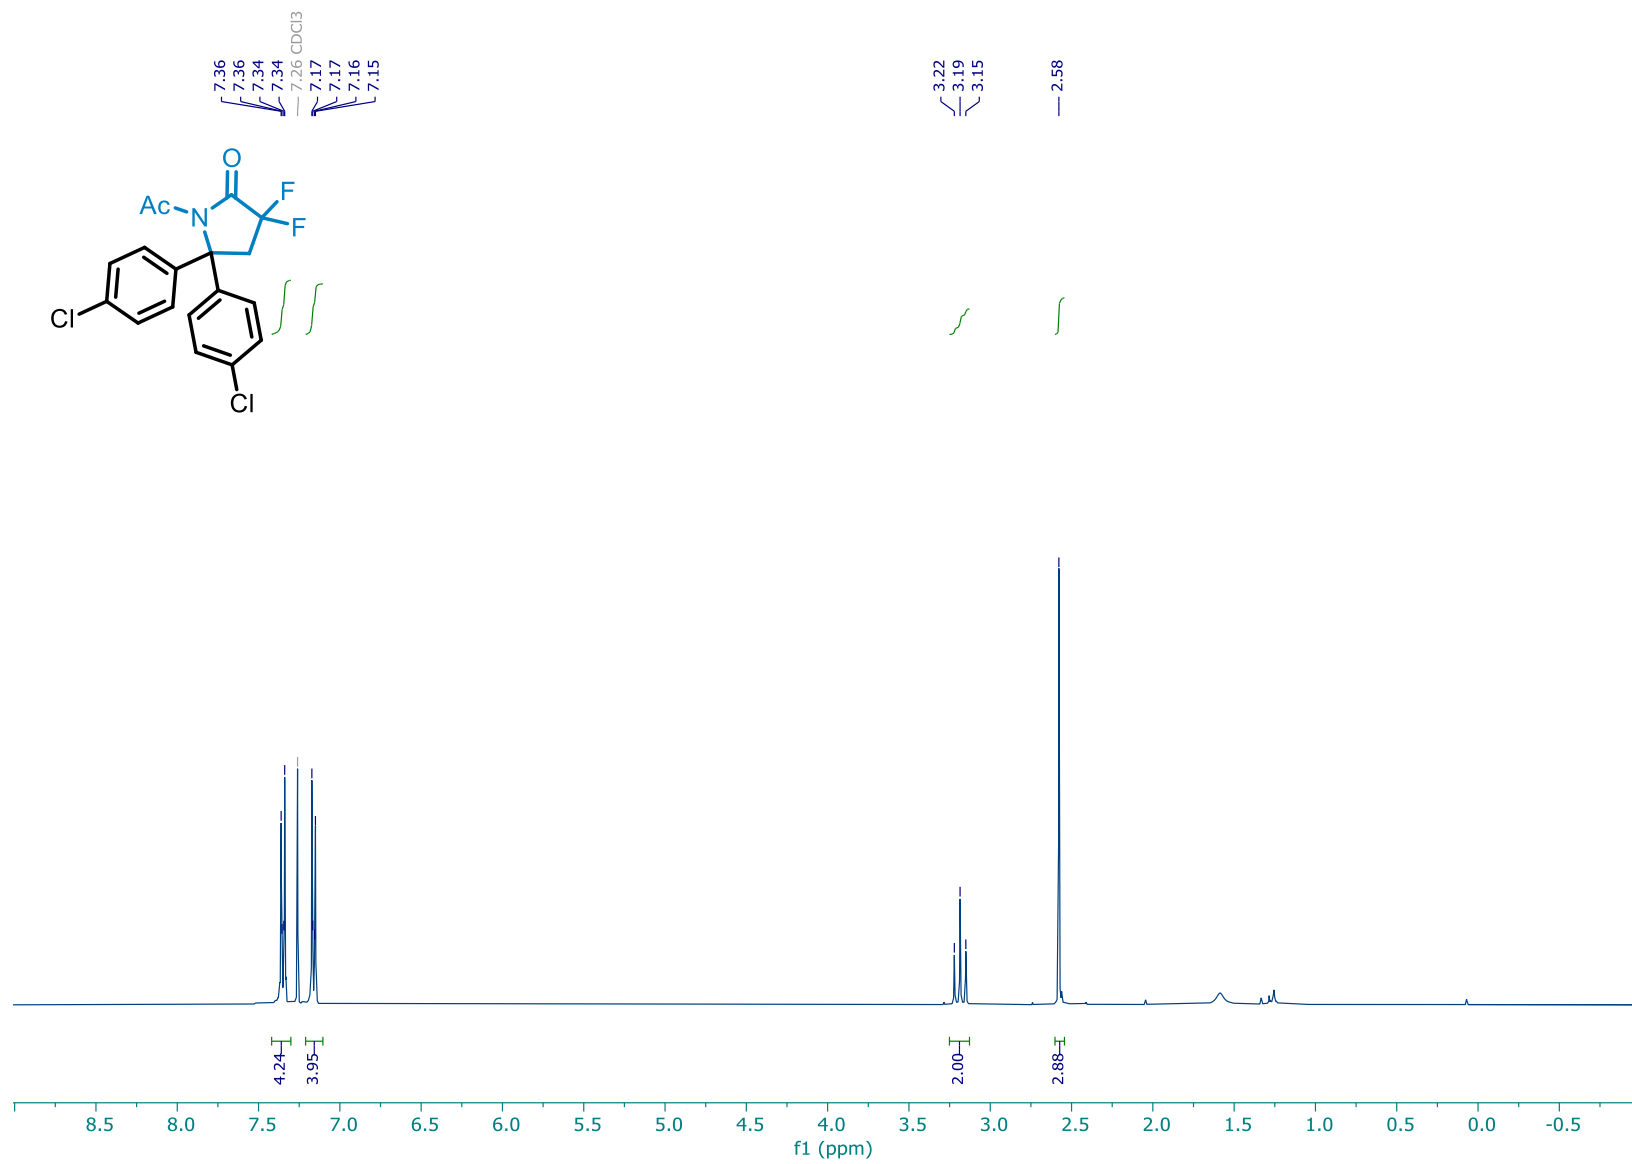

$^{13}\text{C}$  NMR (101 MHz,  $\text{CDCl}_3$ ) of **20**

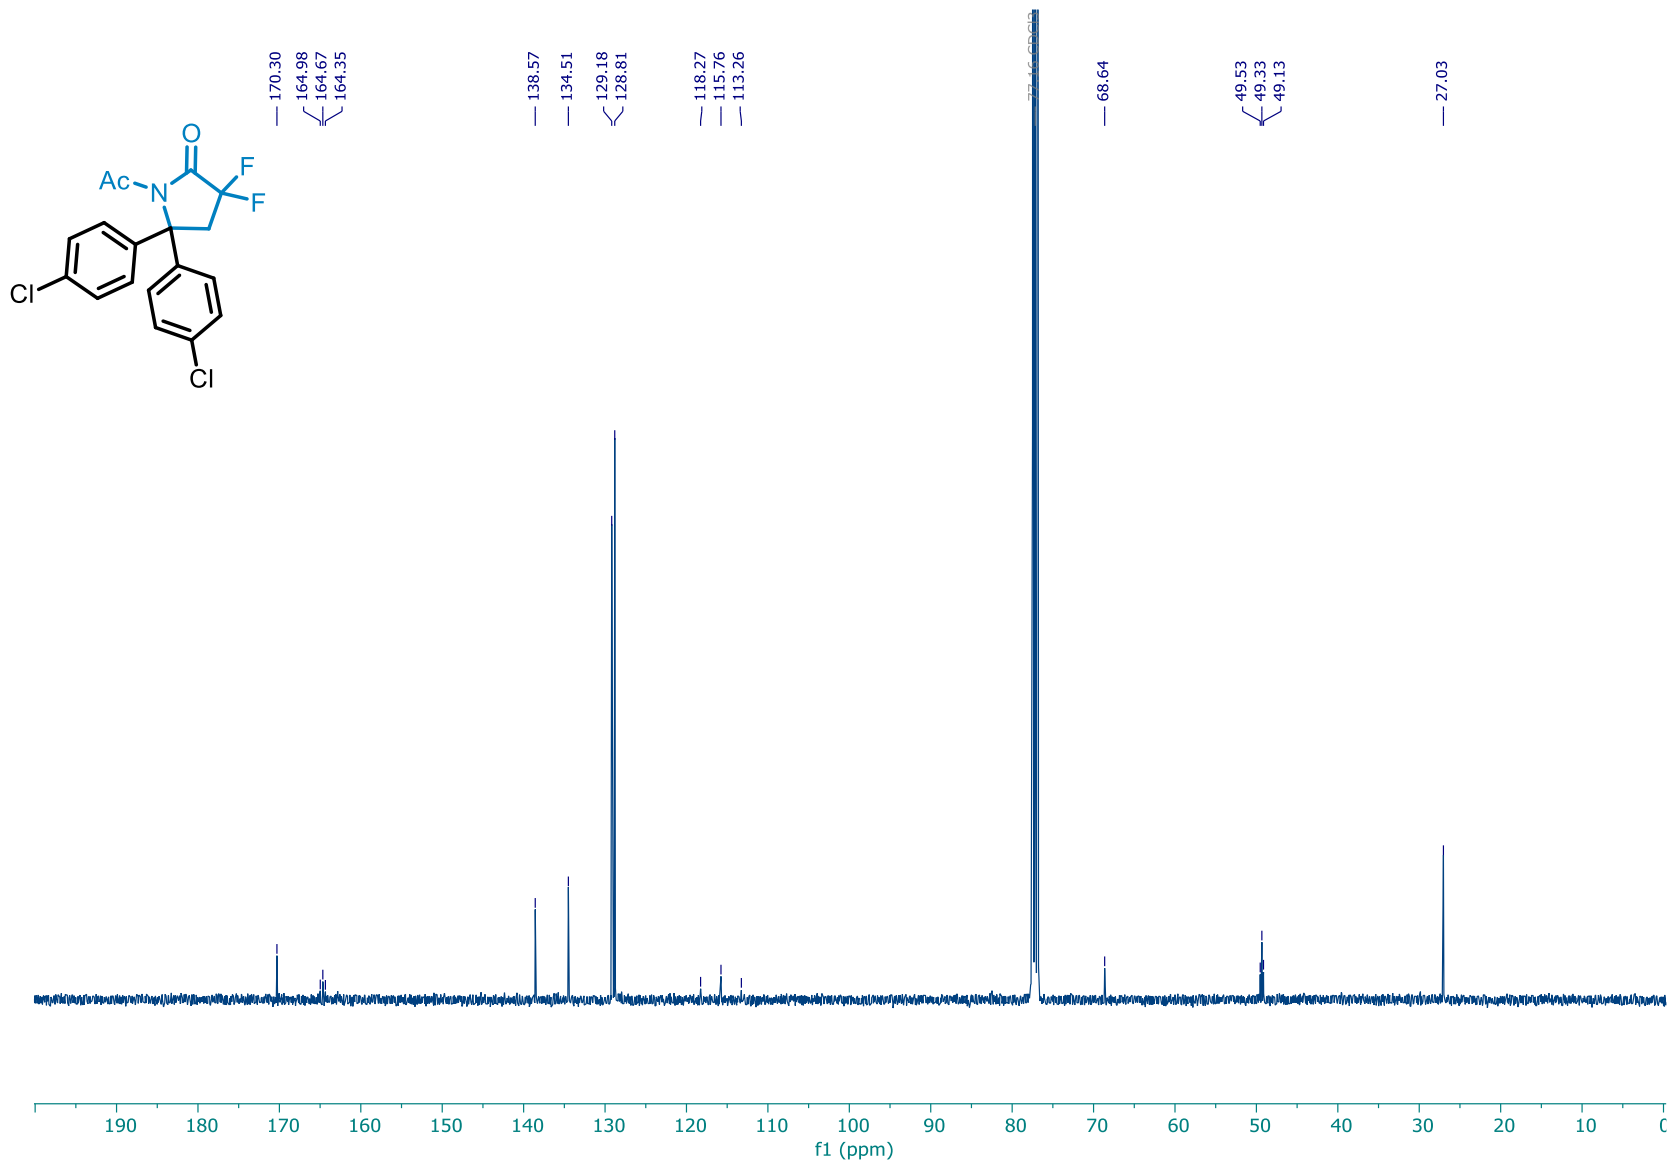

$^{19}\text{F}$  NMR (376 MHz,  $\text{CDCl}_3$ ) of **20**

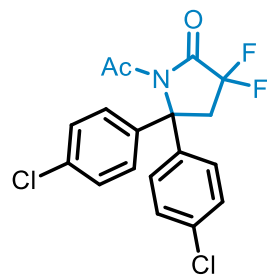

-103.58  
-103.62  
-103.65

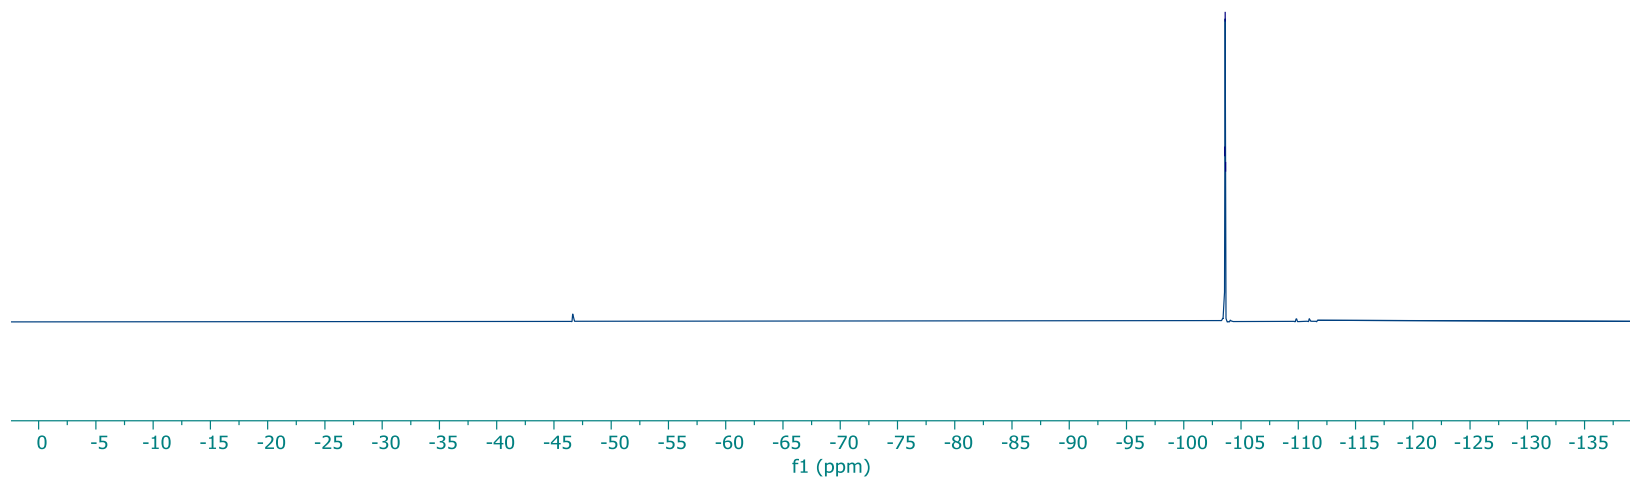

<sup>1</sup>H NMR (400 MHz, CDCl<sub>3</sub>) of **21**

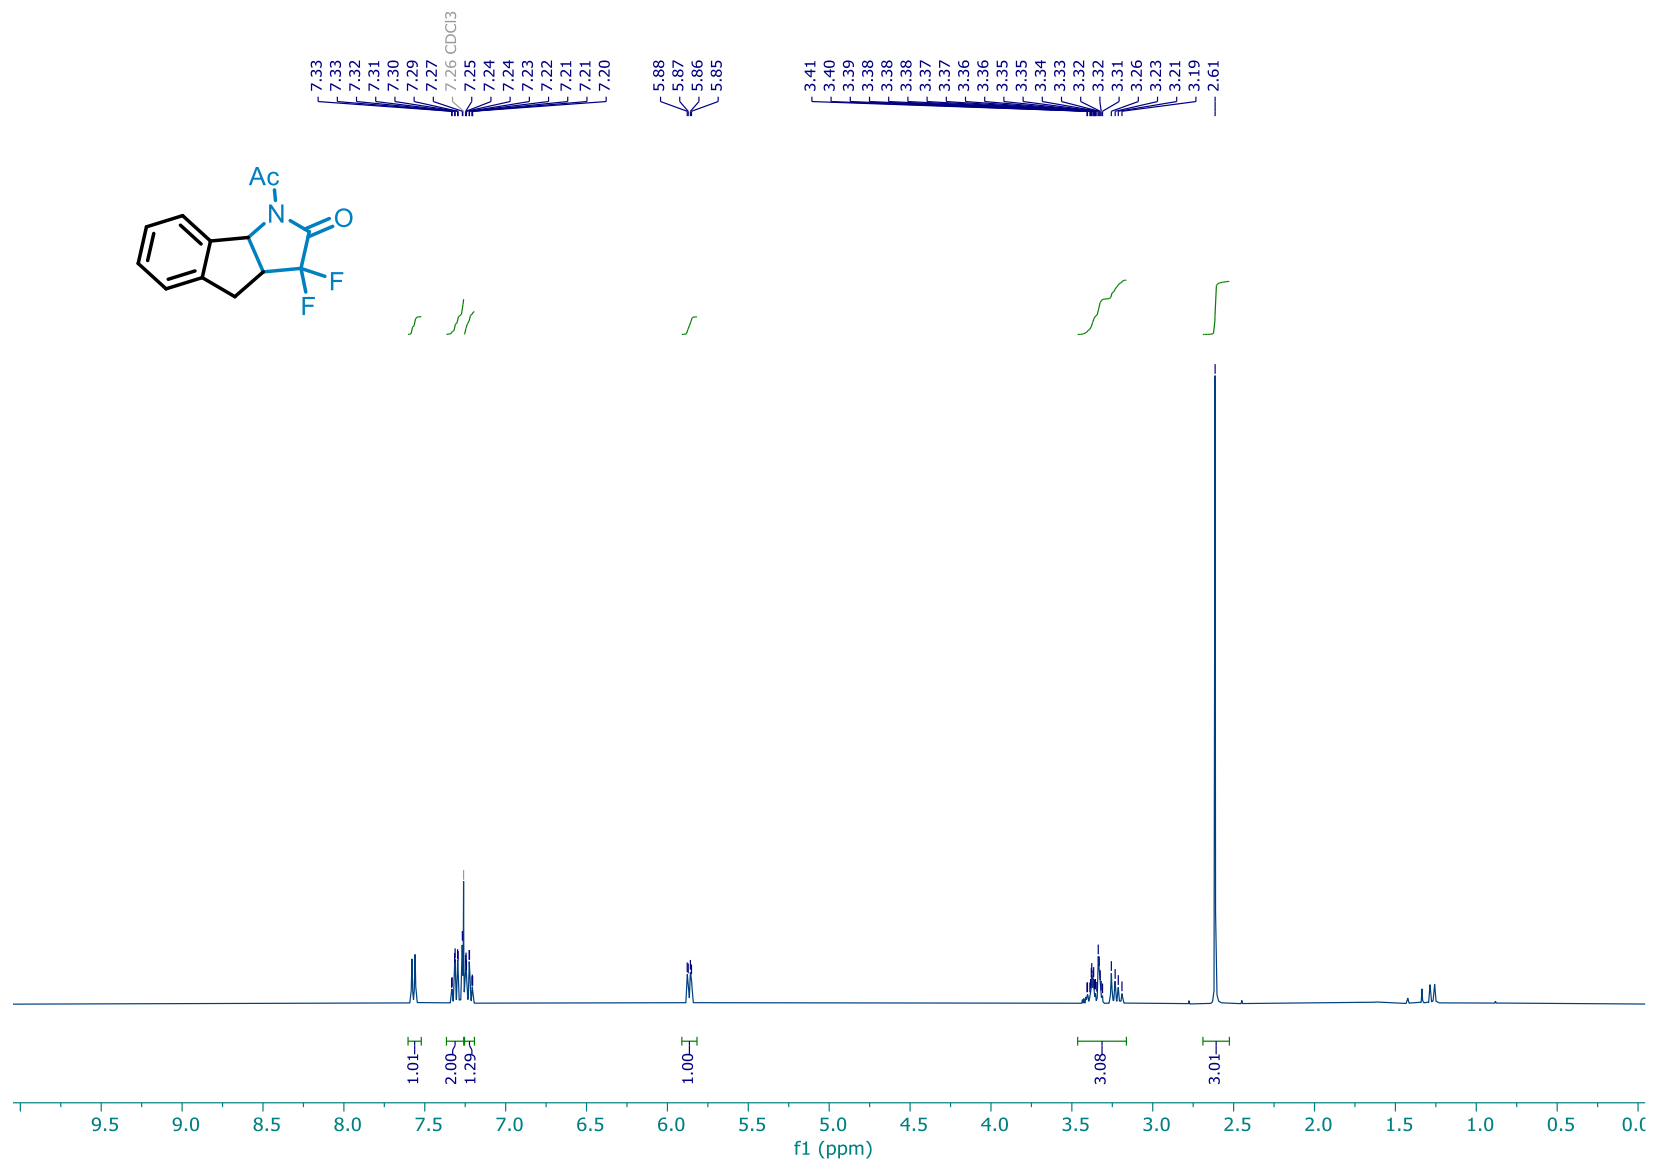



$^{13}\text{C}$  NMR (101 MHz,  $\text{CDCl}_3$ ) of **21**

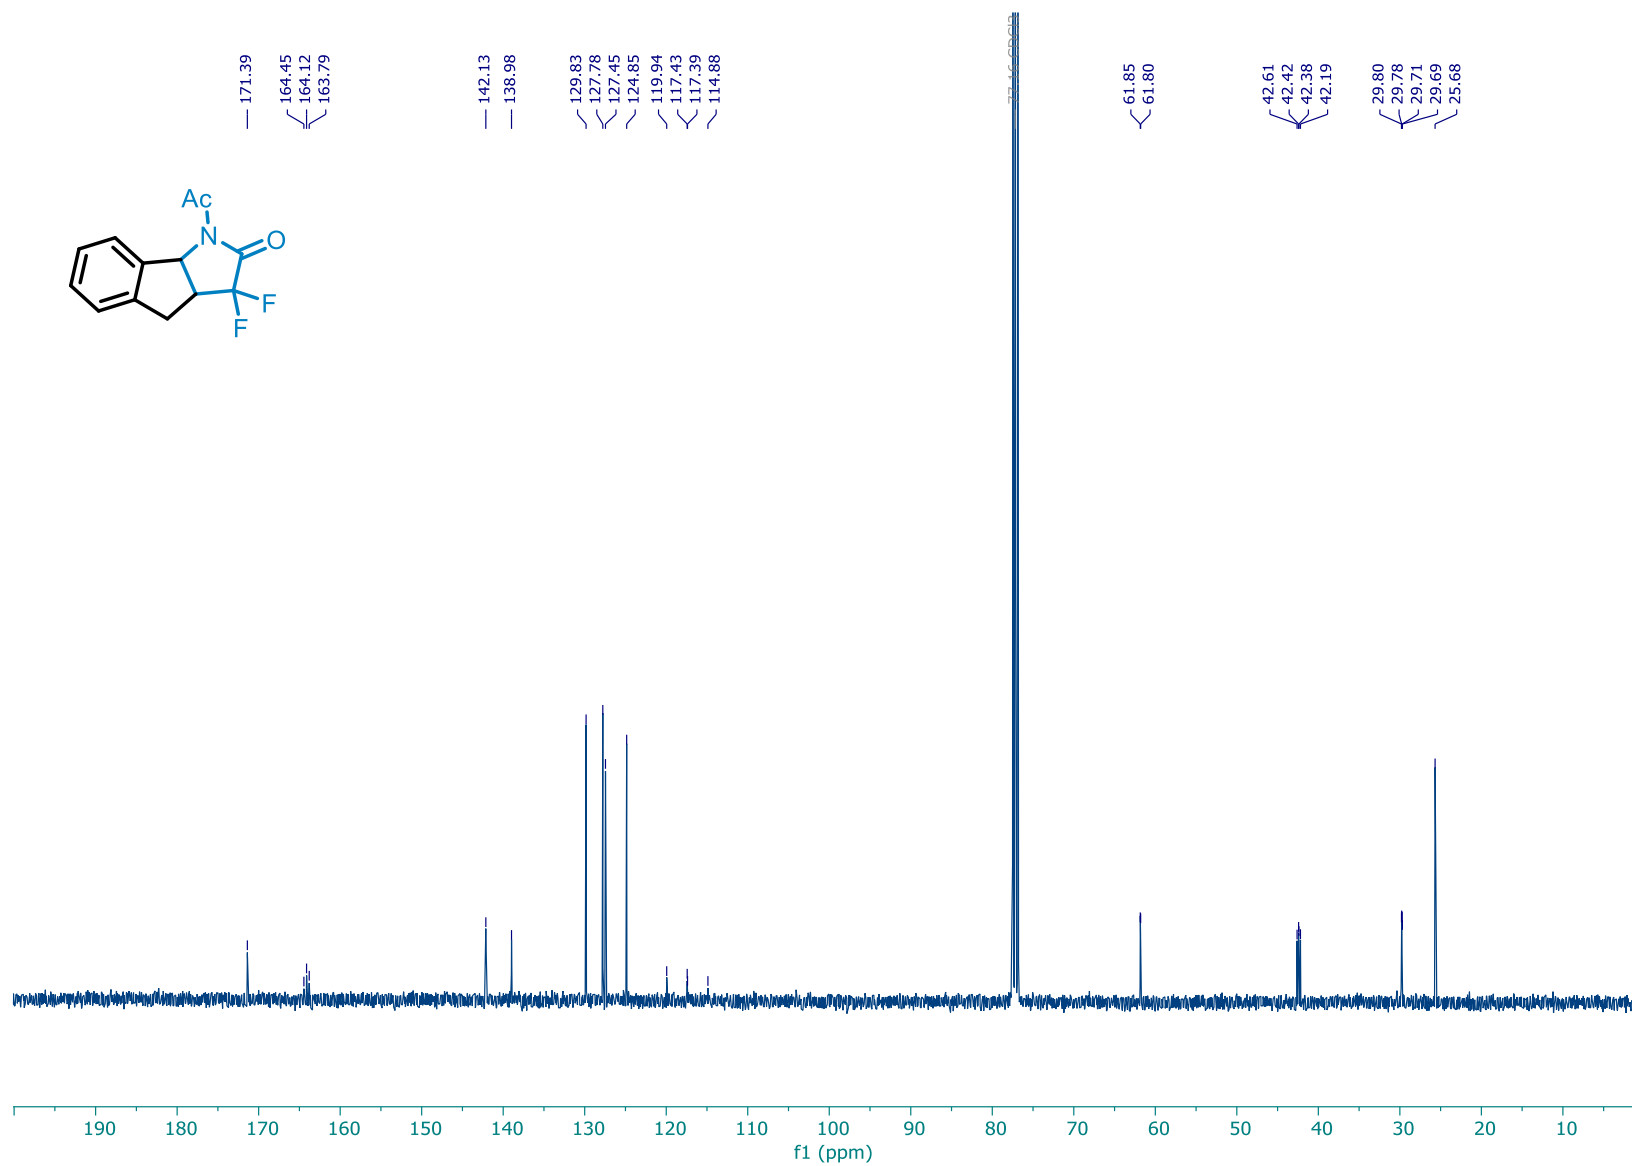

$^{19}\text{F}$  NMR (376 MHz,  $\text{CDCl}_3$ ) of **21**

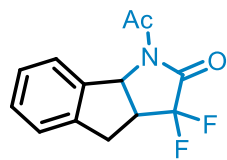

-101.99  
-102.04  
-102.72  
-102.77  
-111.33  
-111.36  
-112.07  
-112.09

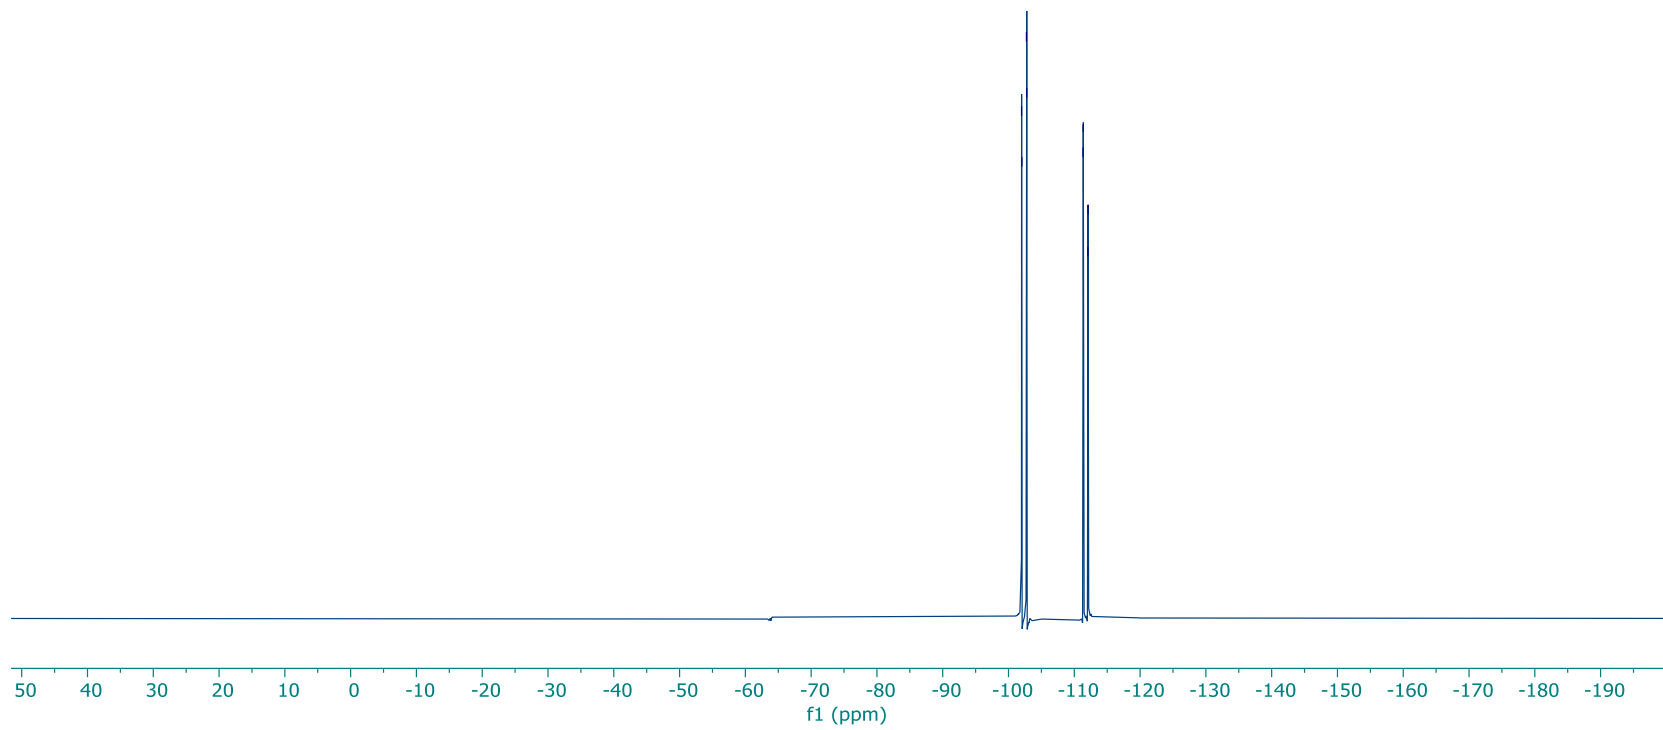

<sup>1</sup>H NMR (300 MHz, CDCl<sub>3</sub>) of **22**

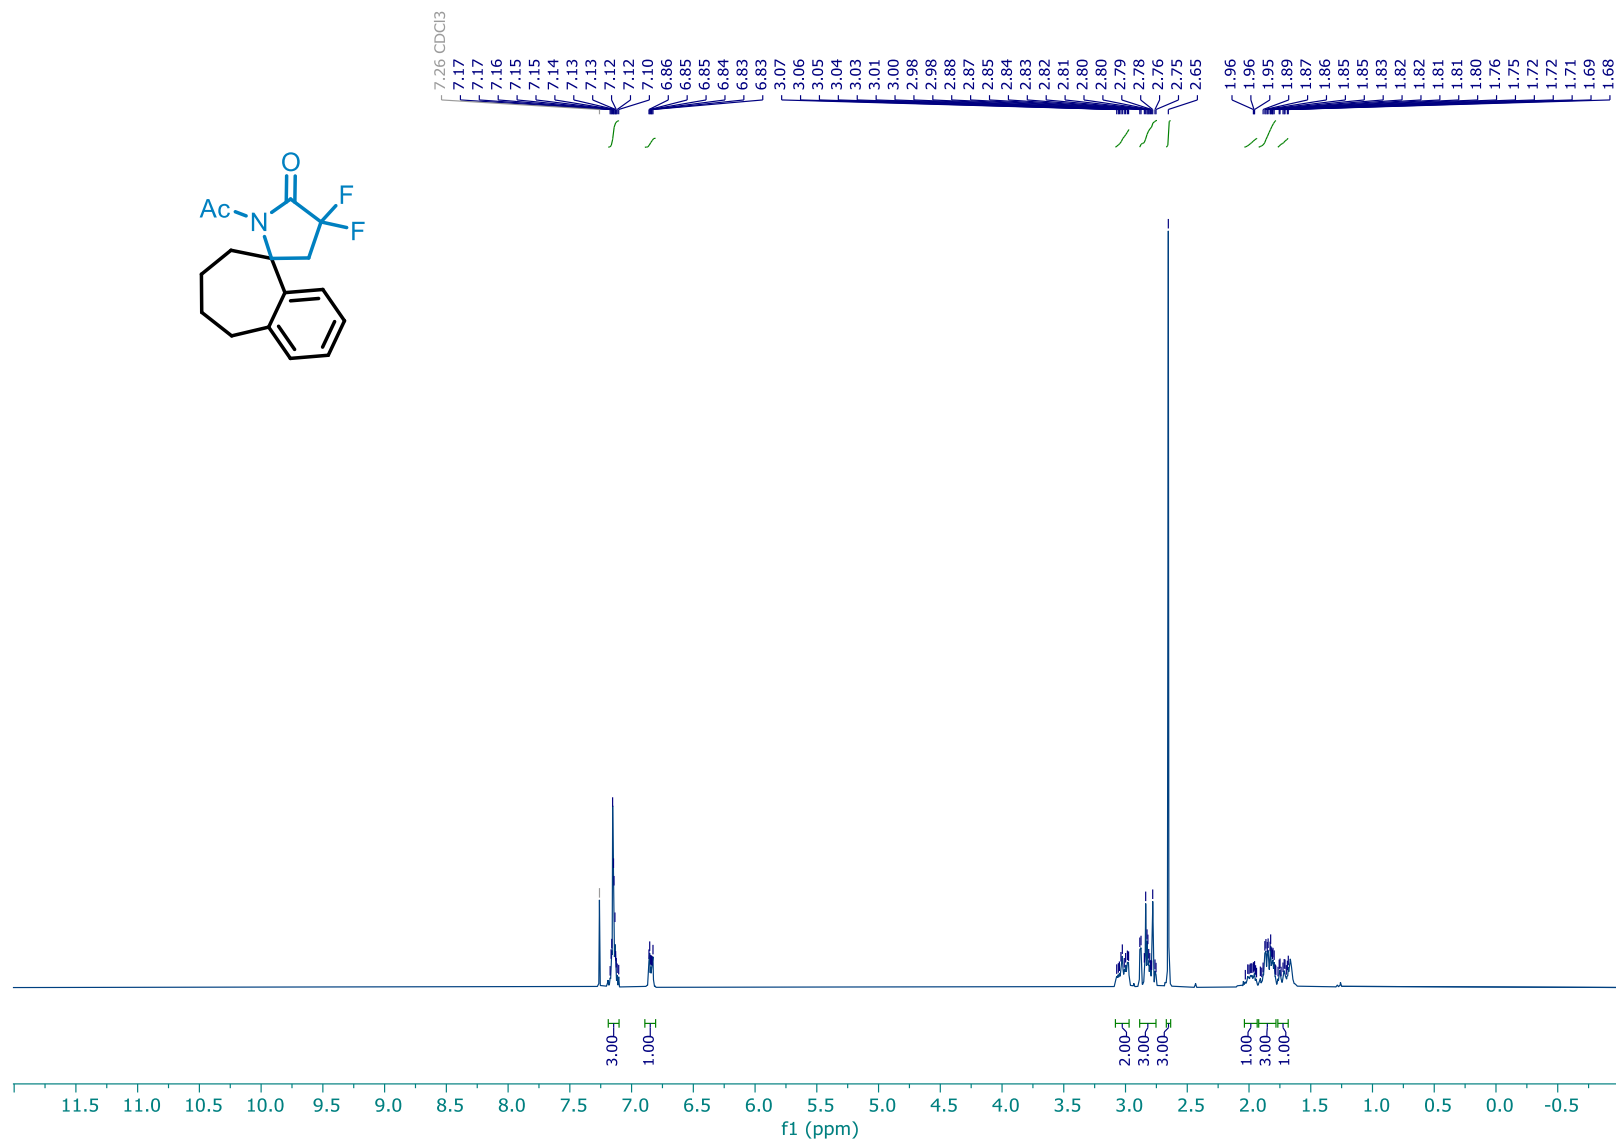

$^{13}\text{C}$  NMR (75 MHz,  $\text{CDCl}_3$ ) of **22**

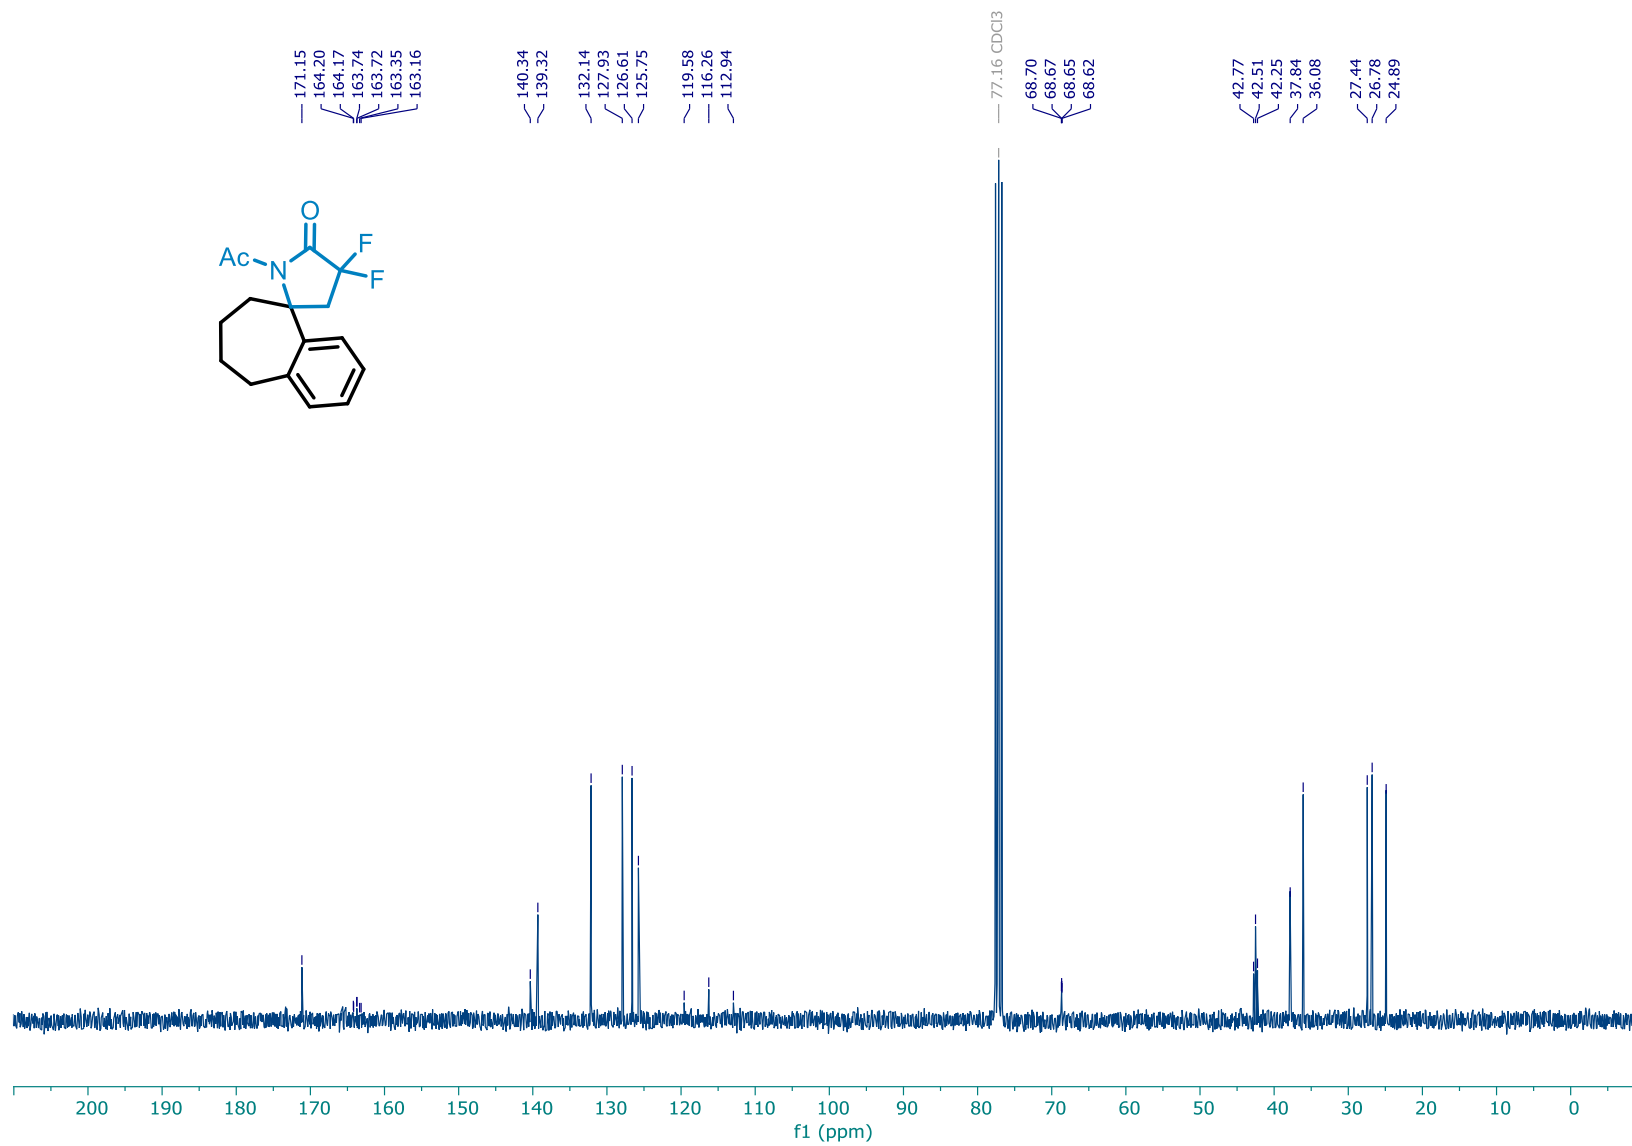

$^{19}\text{F}$  NMR (282 MHz,  $\text{CDCl}_3$ ) of **22**

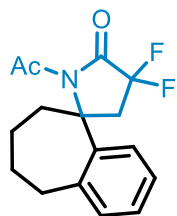

-101.89  
-102.87  
-103.95  
-104.92

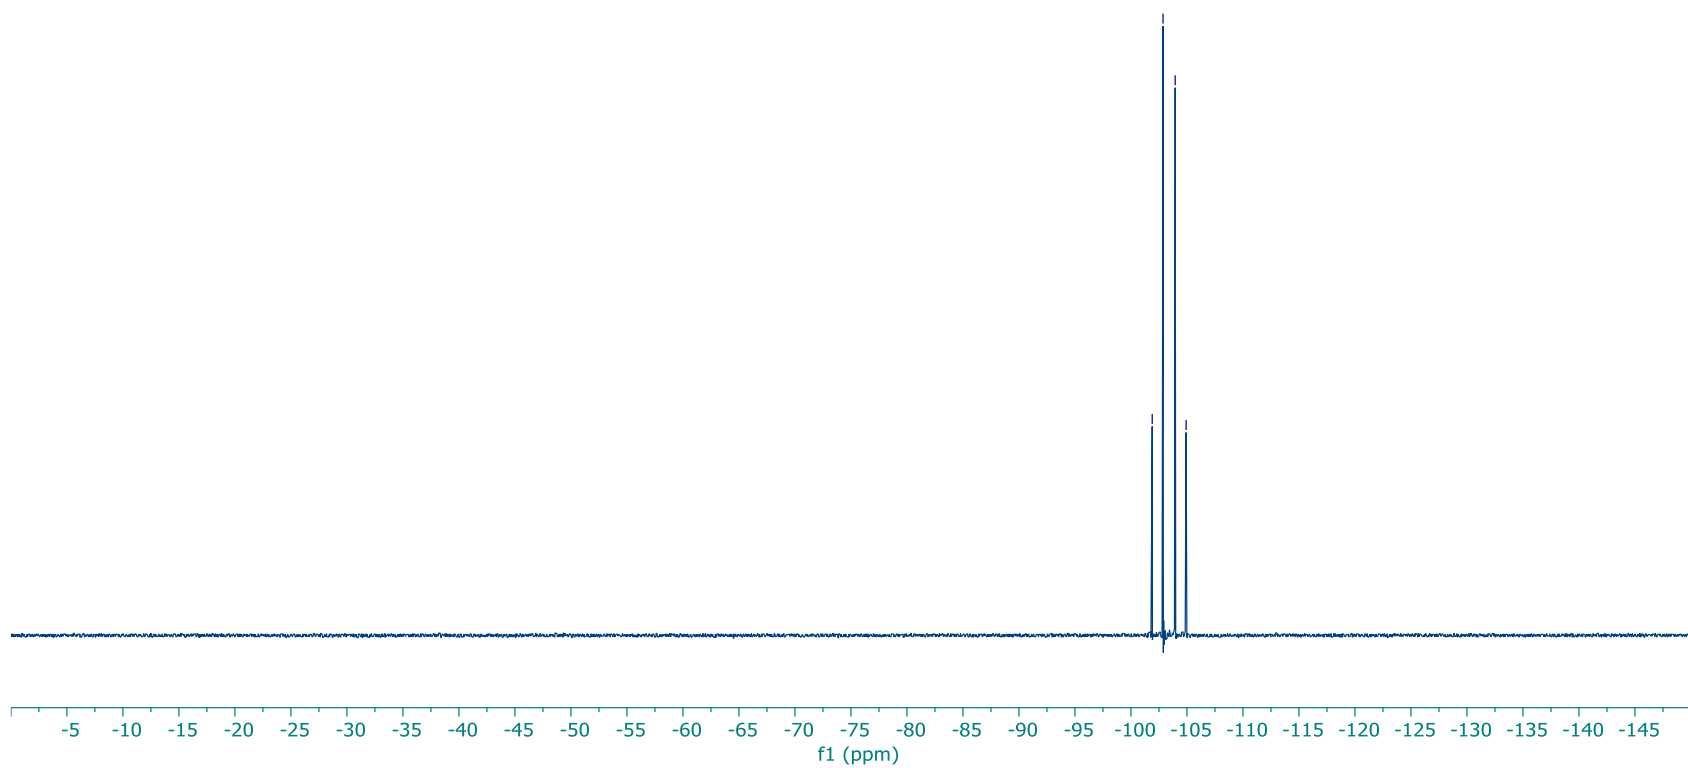

$^1\text{H}$  NMR (300 MHz,  $\text{CDCl}_3$ ) of **23**

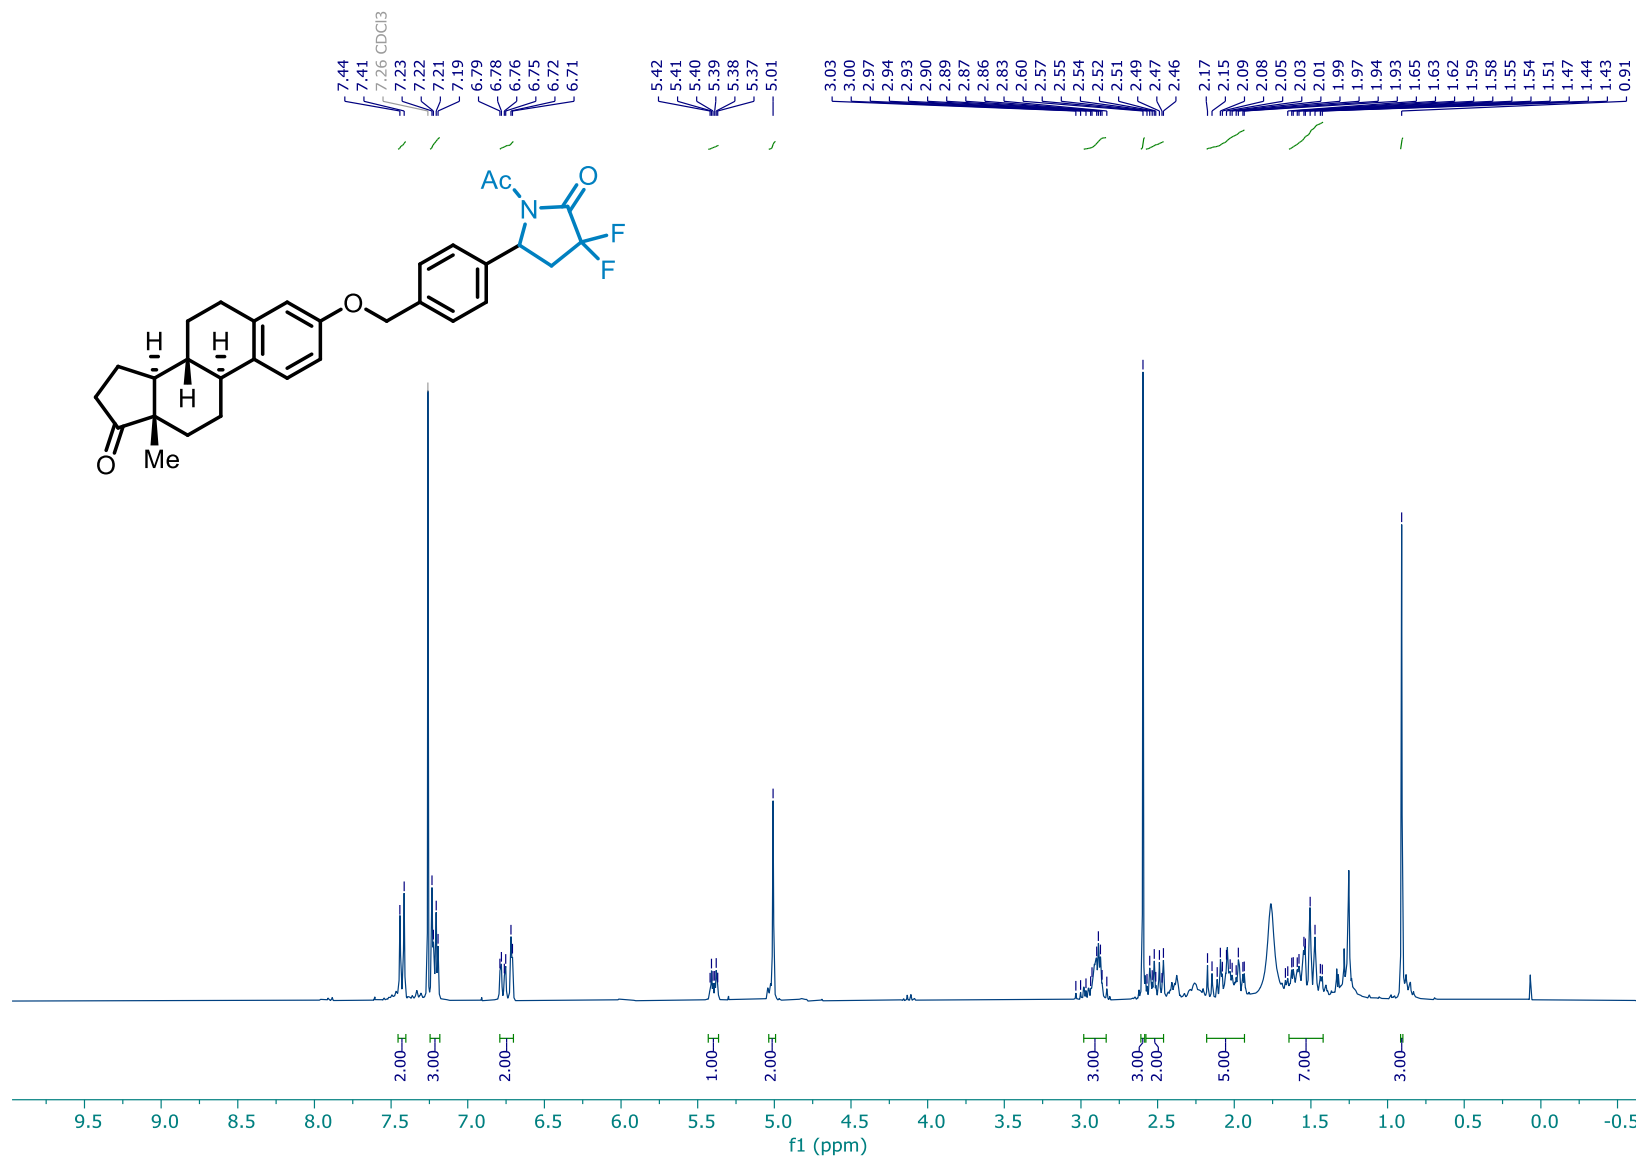

$^{13}\text{C}$  NMR (126 MHz,  $\text{CDCl}_3$ ) of **23**

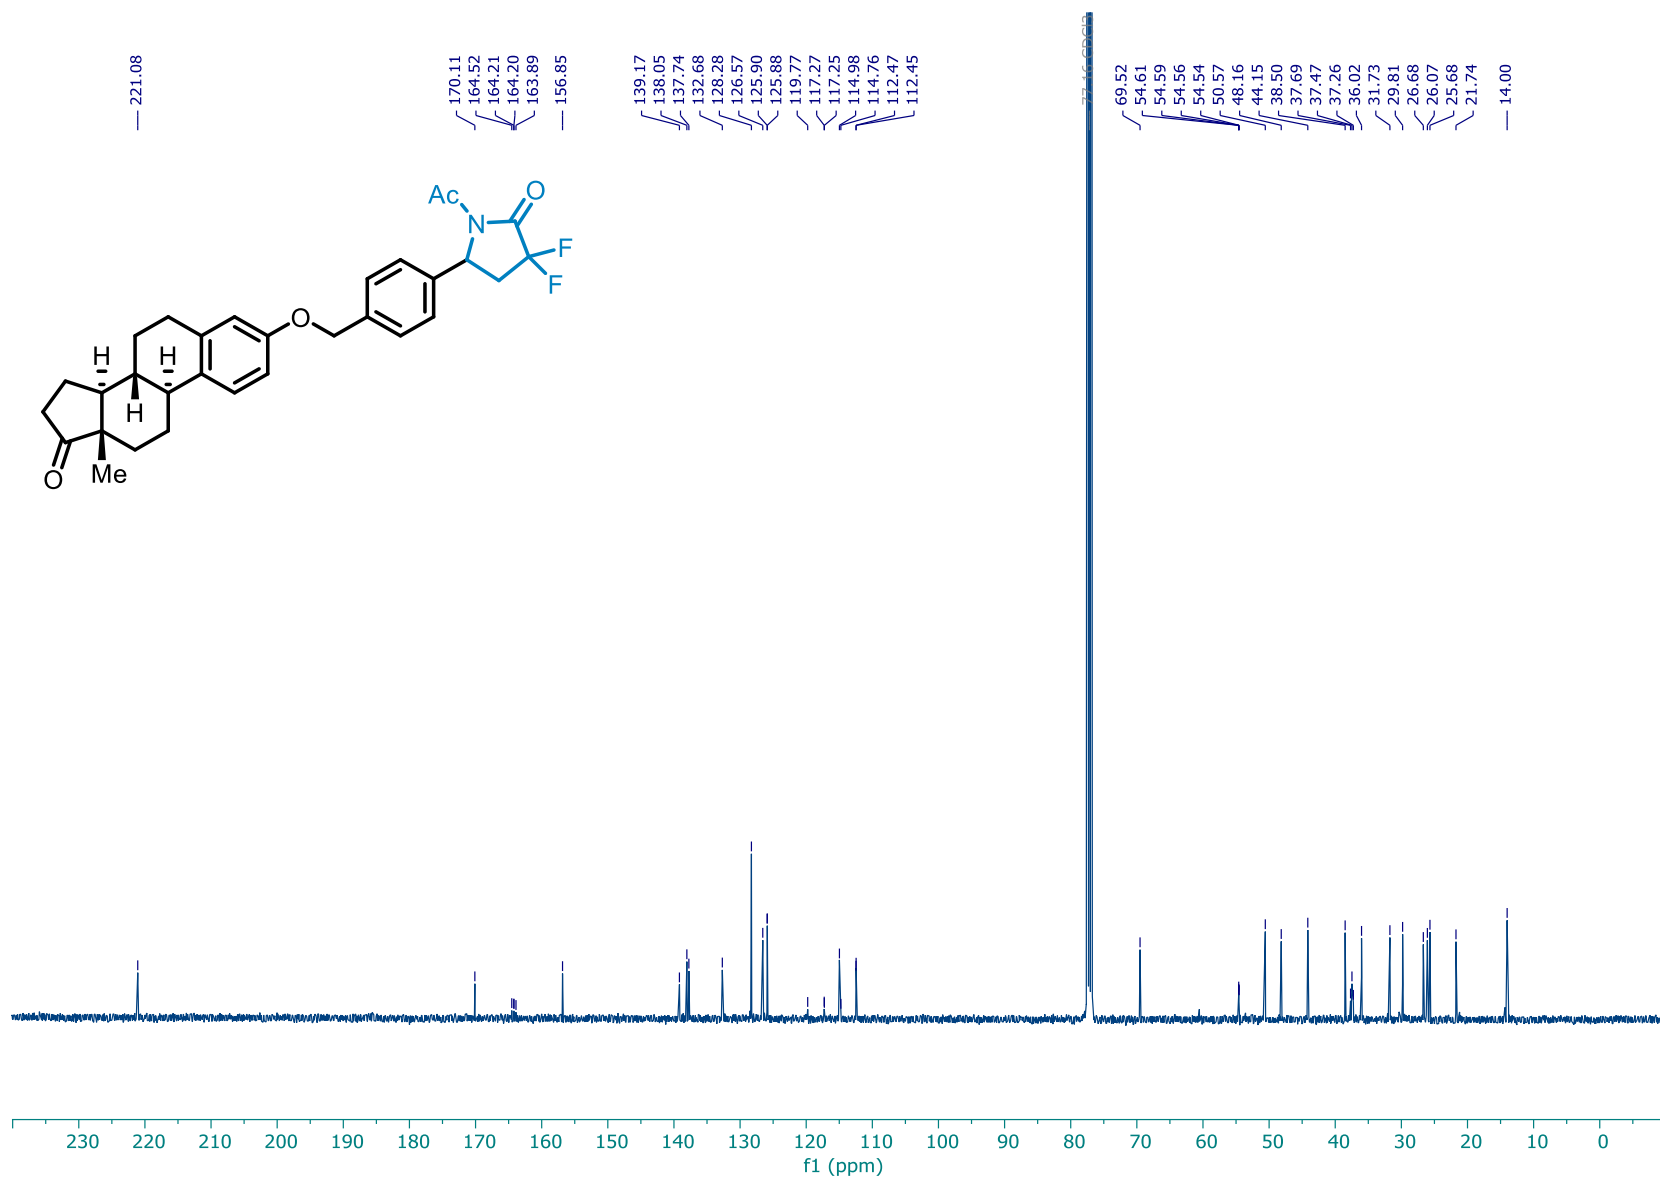

$^{19}\text{F}$  NMR (282 MHz,  $\text{CDCl}_3$ ) of **23**

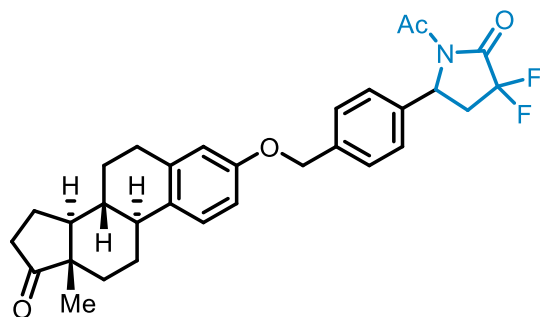

-99.10  
-100.07  
-103.26  
-104.24

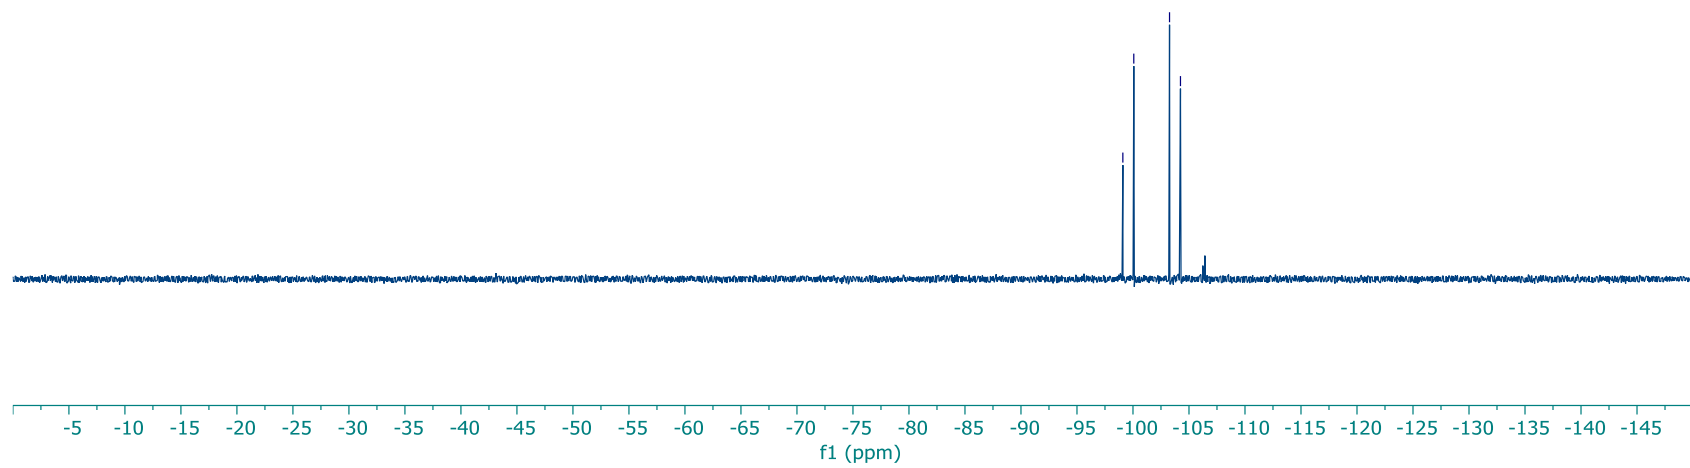



<sup>1</sup>H NMR (300 MHz, CDCl<sub>3</sub>) of 3

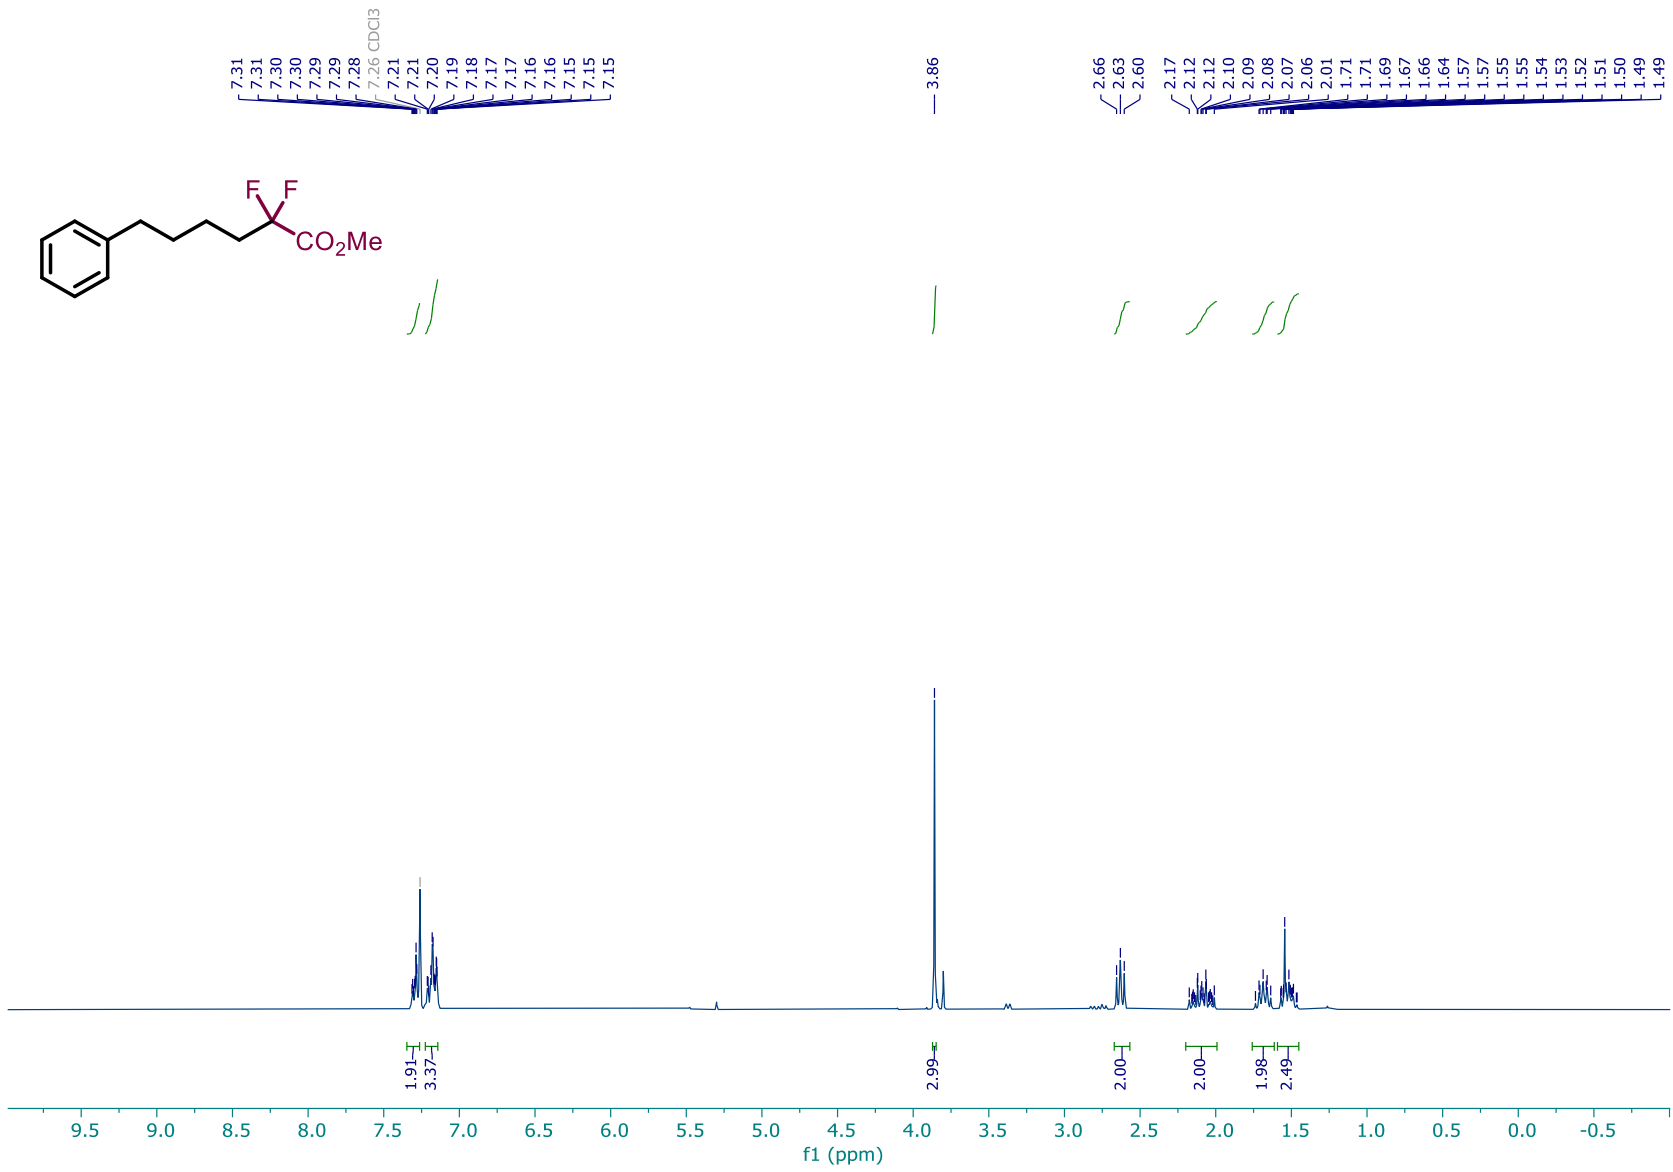

$^{19}\text{F}$  NMR (282 MHz,  $\text{CDCl}_3$ ) of **3**

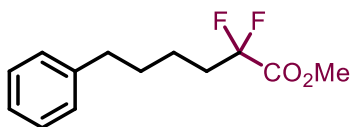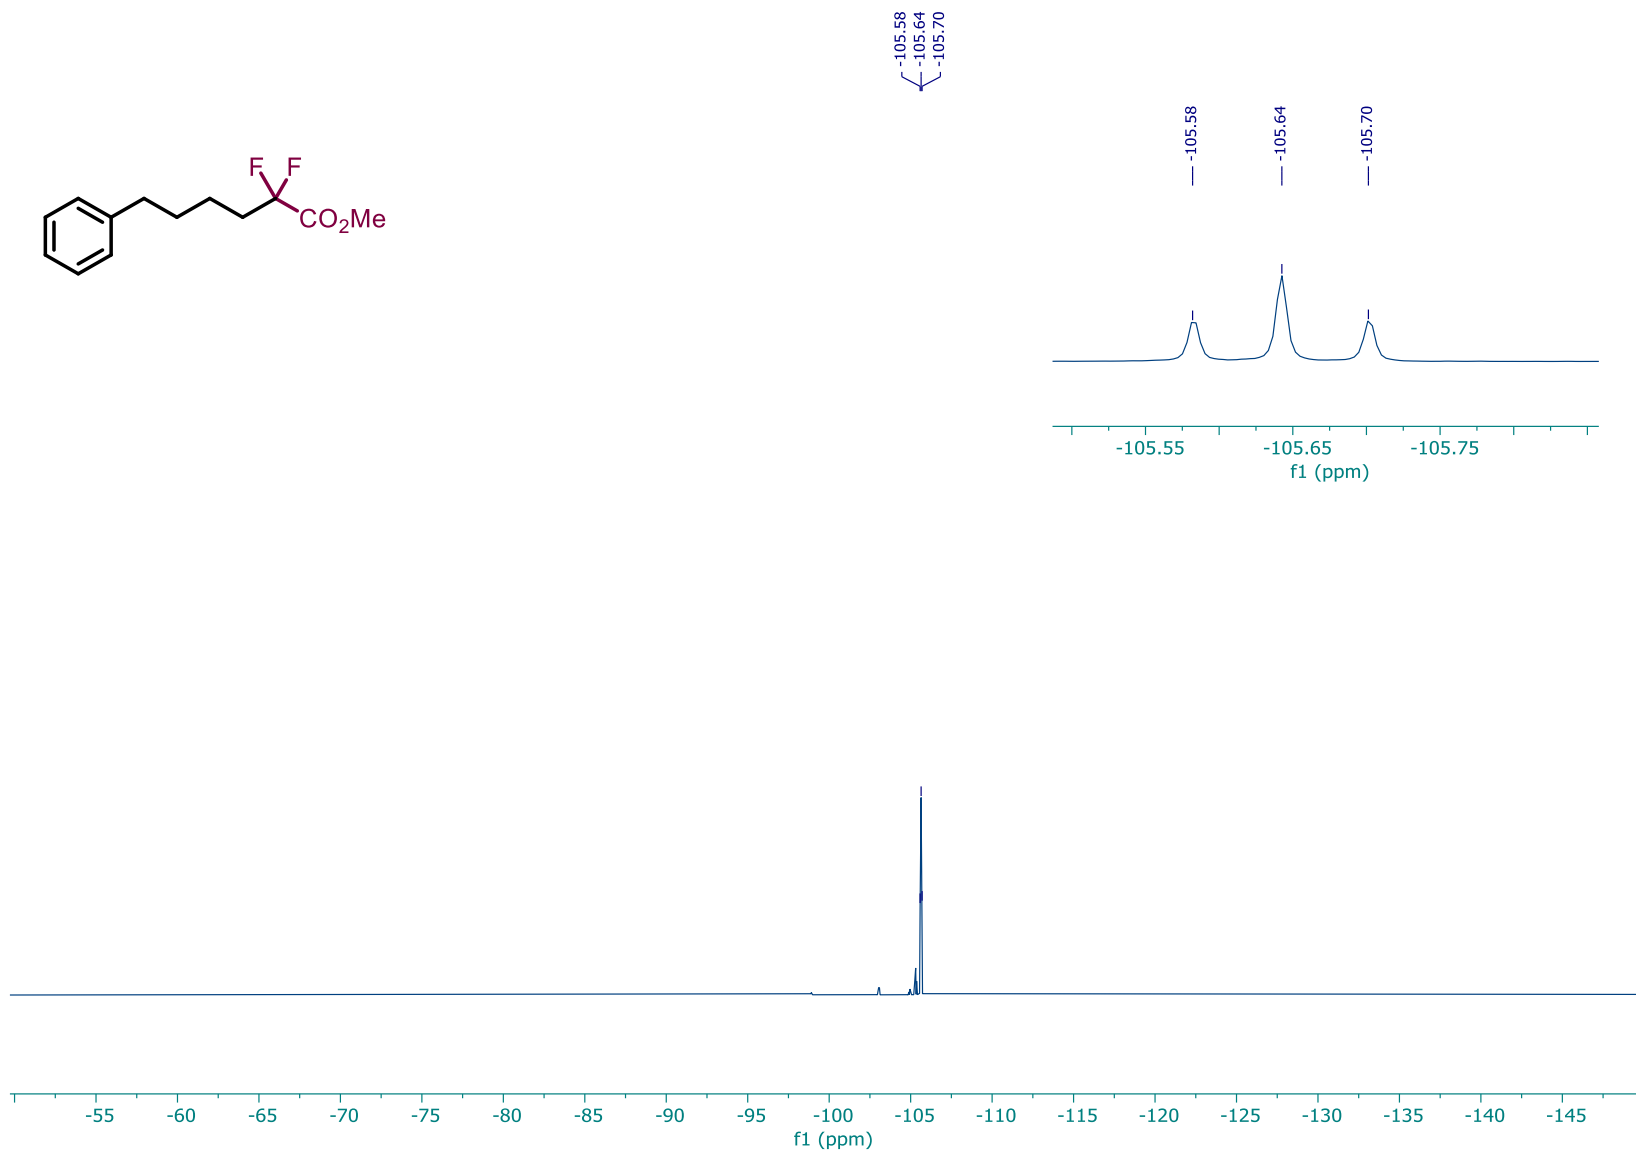

<sup>1</sup>H NMR (300 MHz, CDCl<sub>3</sub>) of **24**

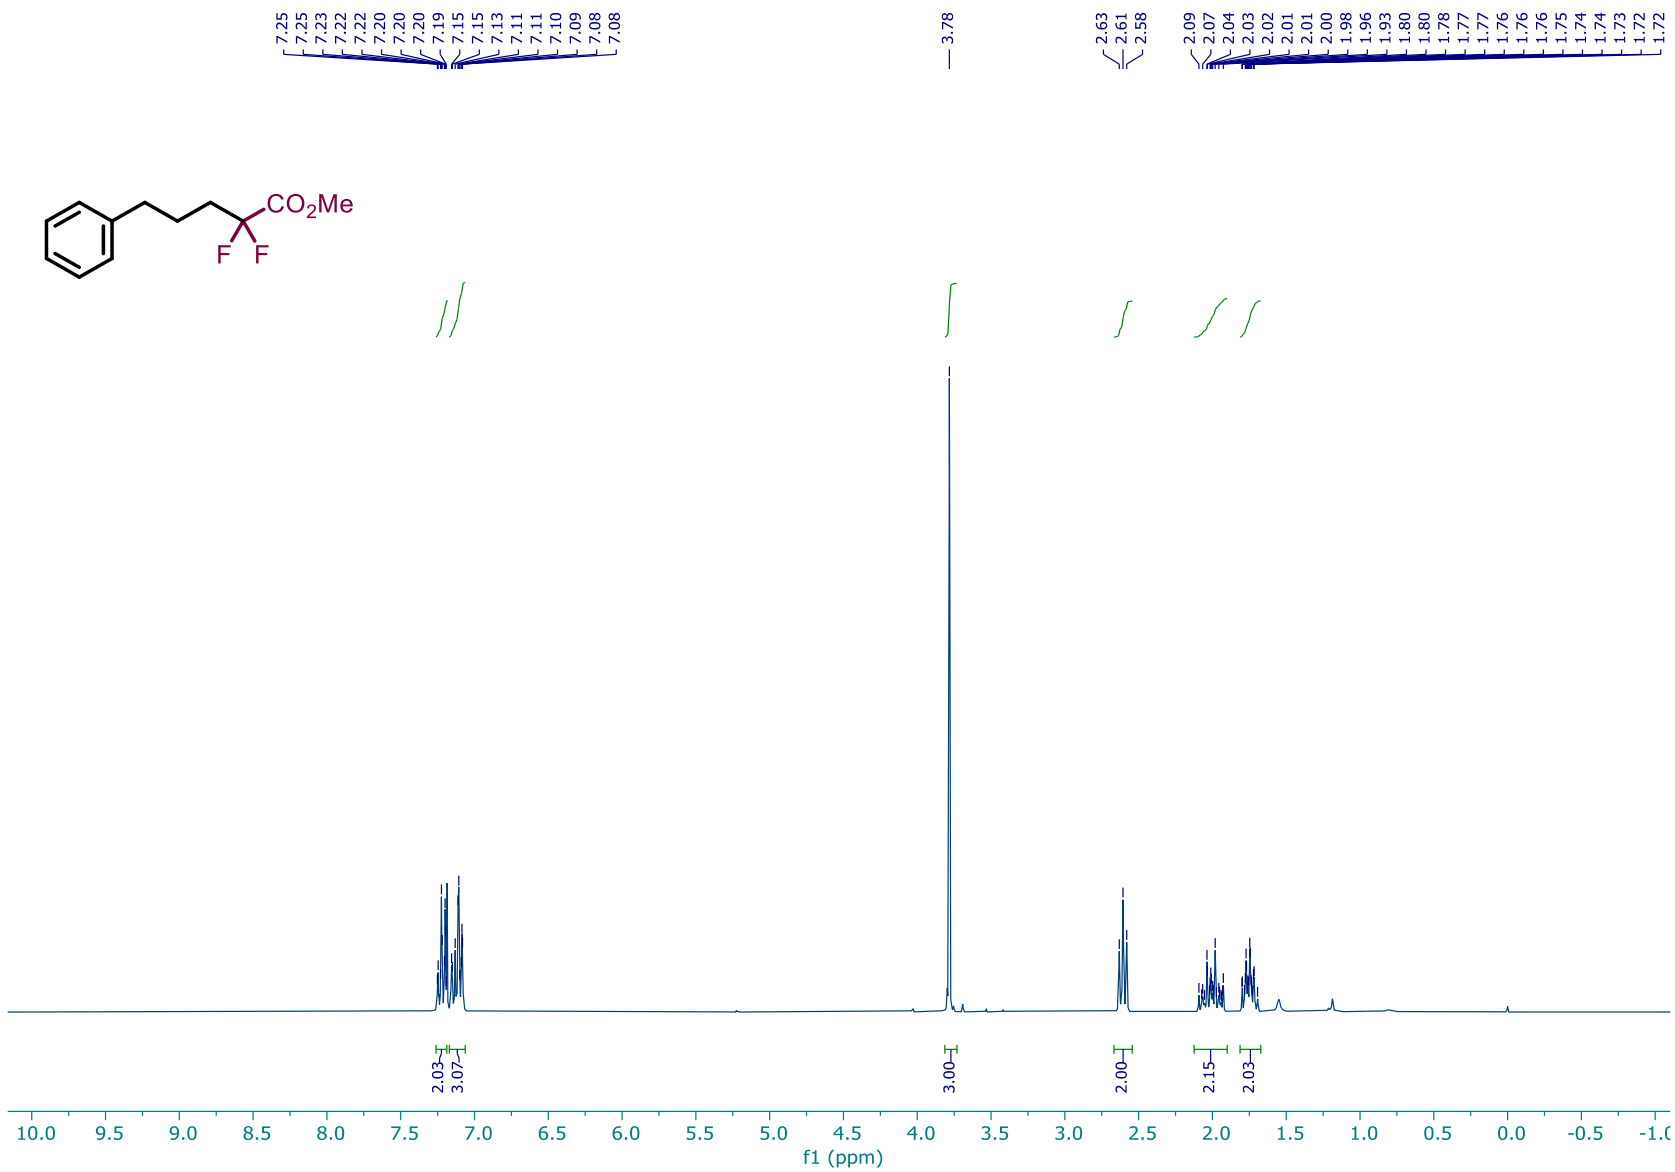

$^{13}\text{C}$  NMR (75 MHz,  $\text{CDCl}_3$ ) of **24**

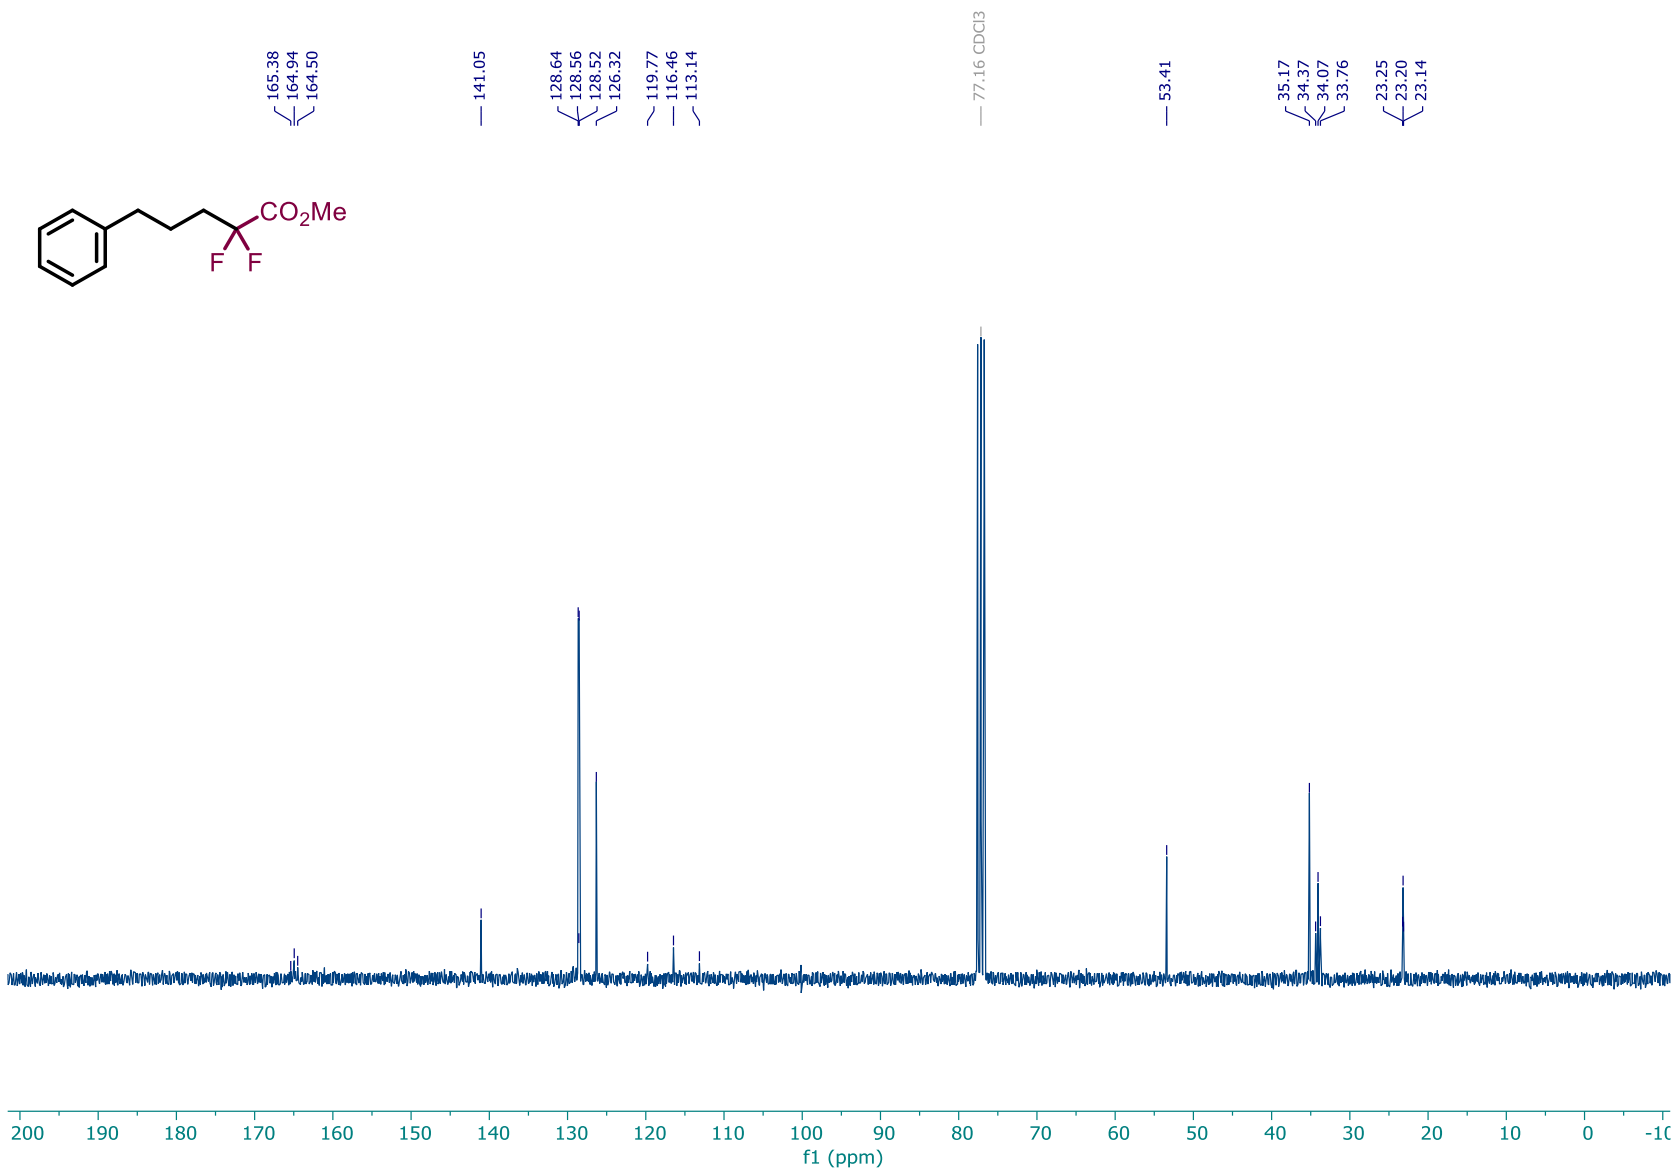

$^{19}\text{F}$  NMR (282 MHz,  $\text{CDCl}_3$ ) of **24**

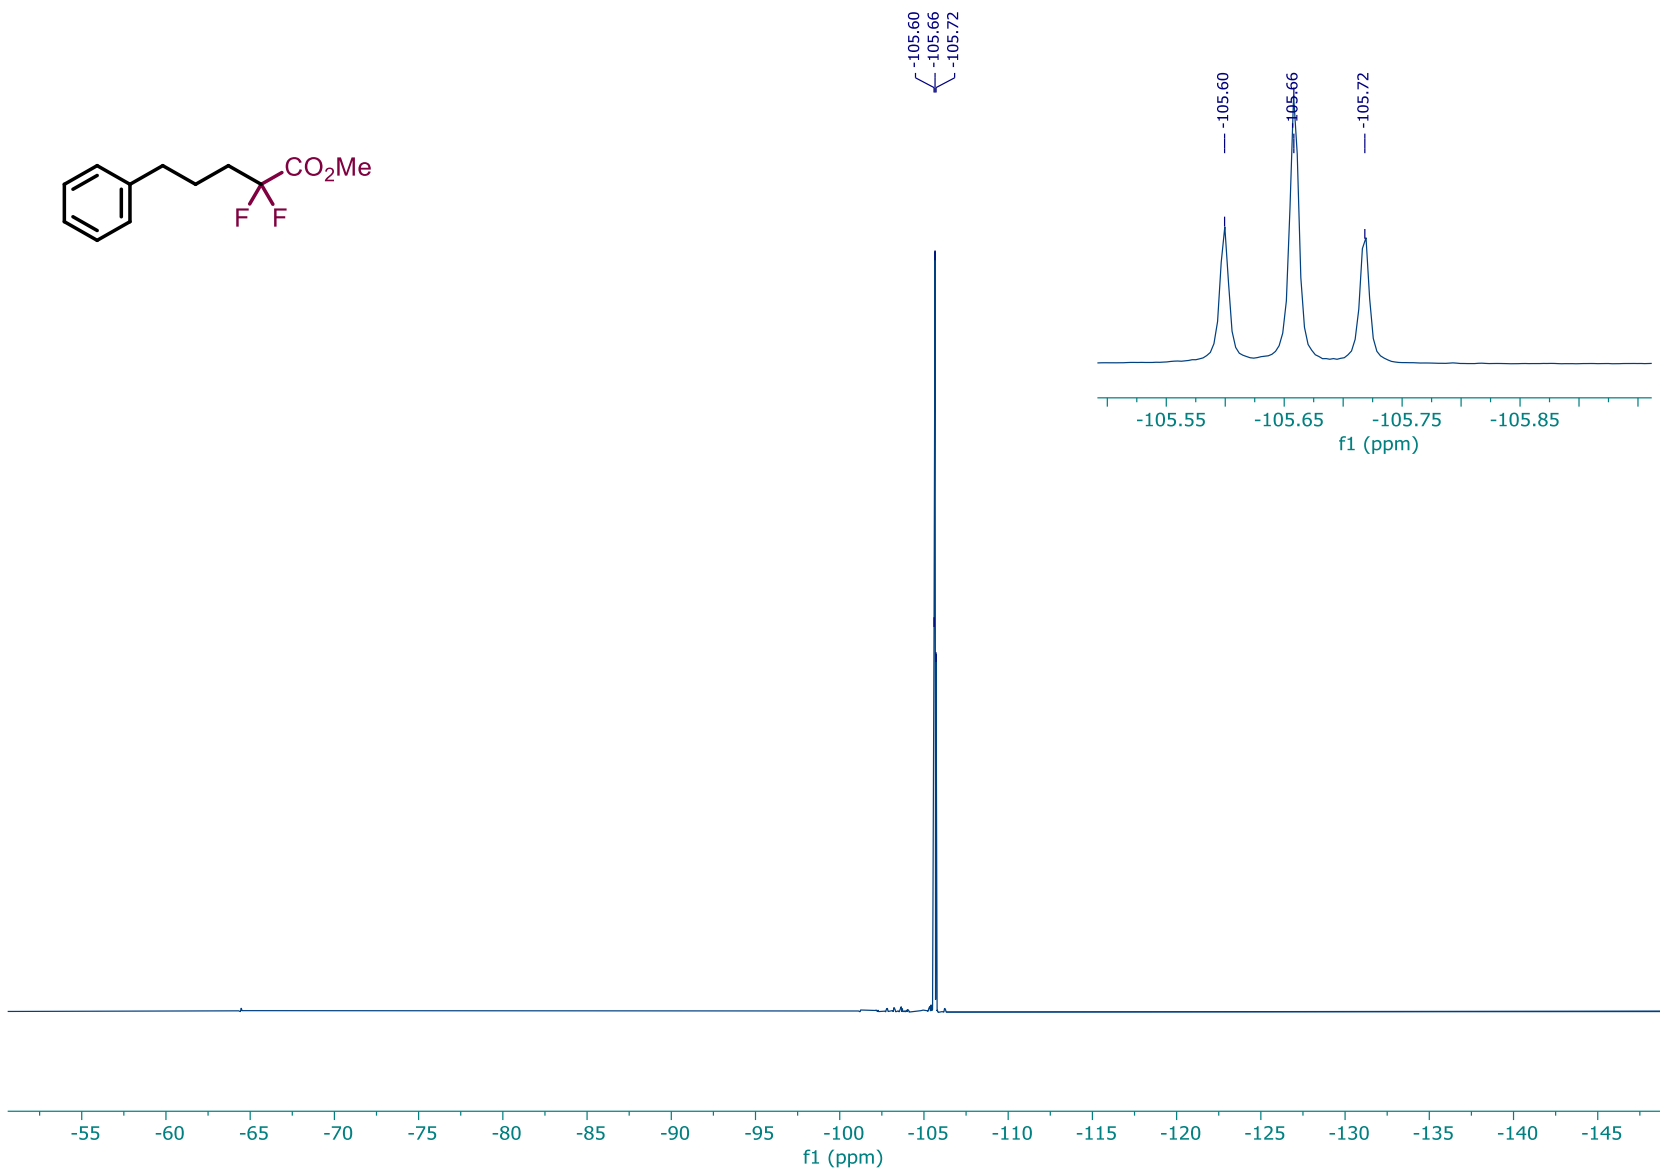

<sup>1</sup>H NMR (400 MHz, CDCl<sub>3</sub>) of **25**

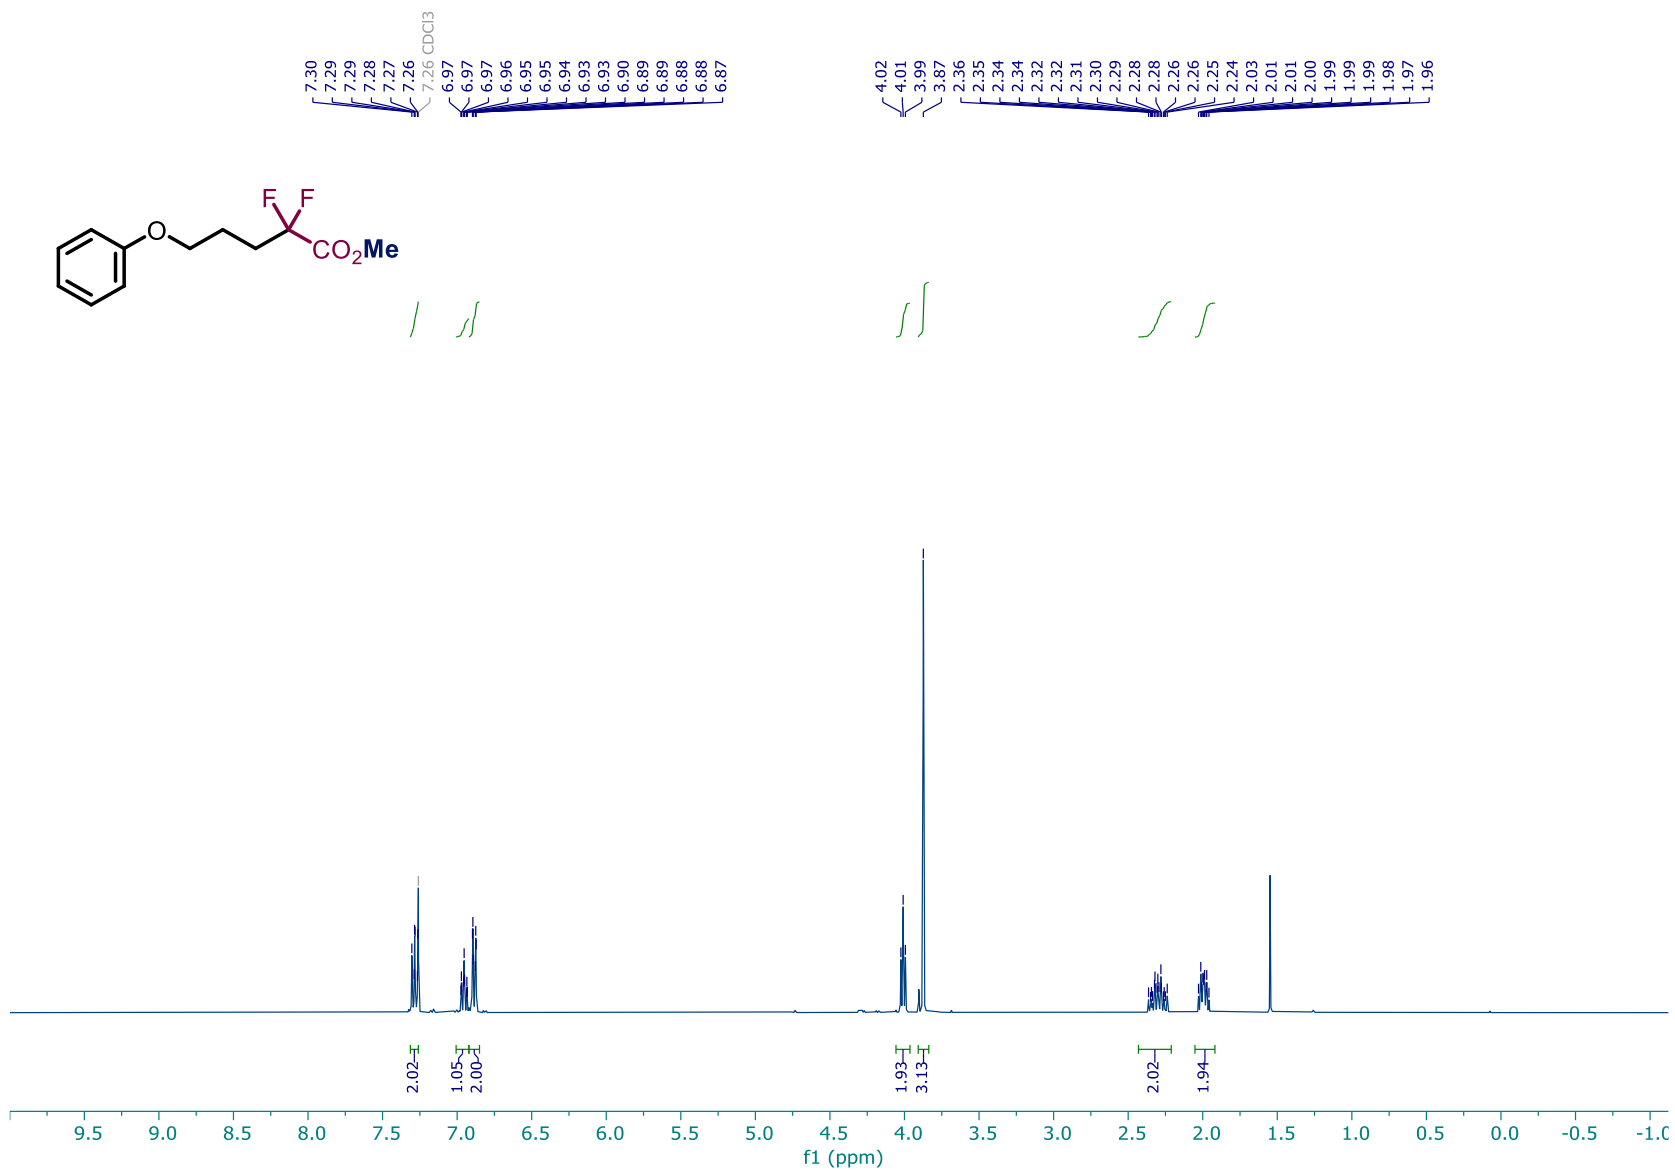

<sup>13</sup>C NMR (101 MHz, CDCl<sub>3</sub>) of **25**

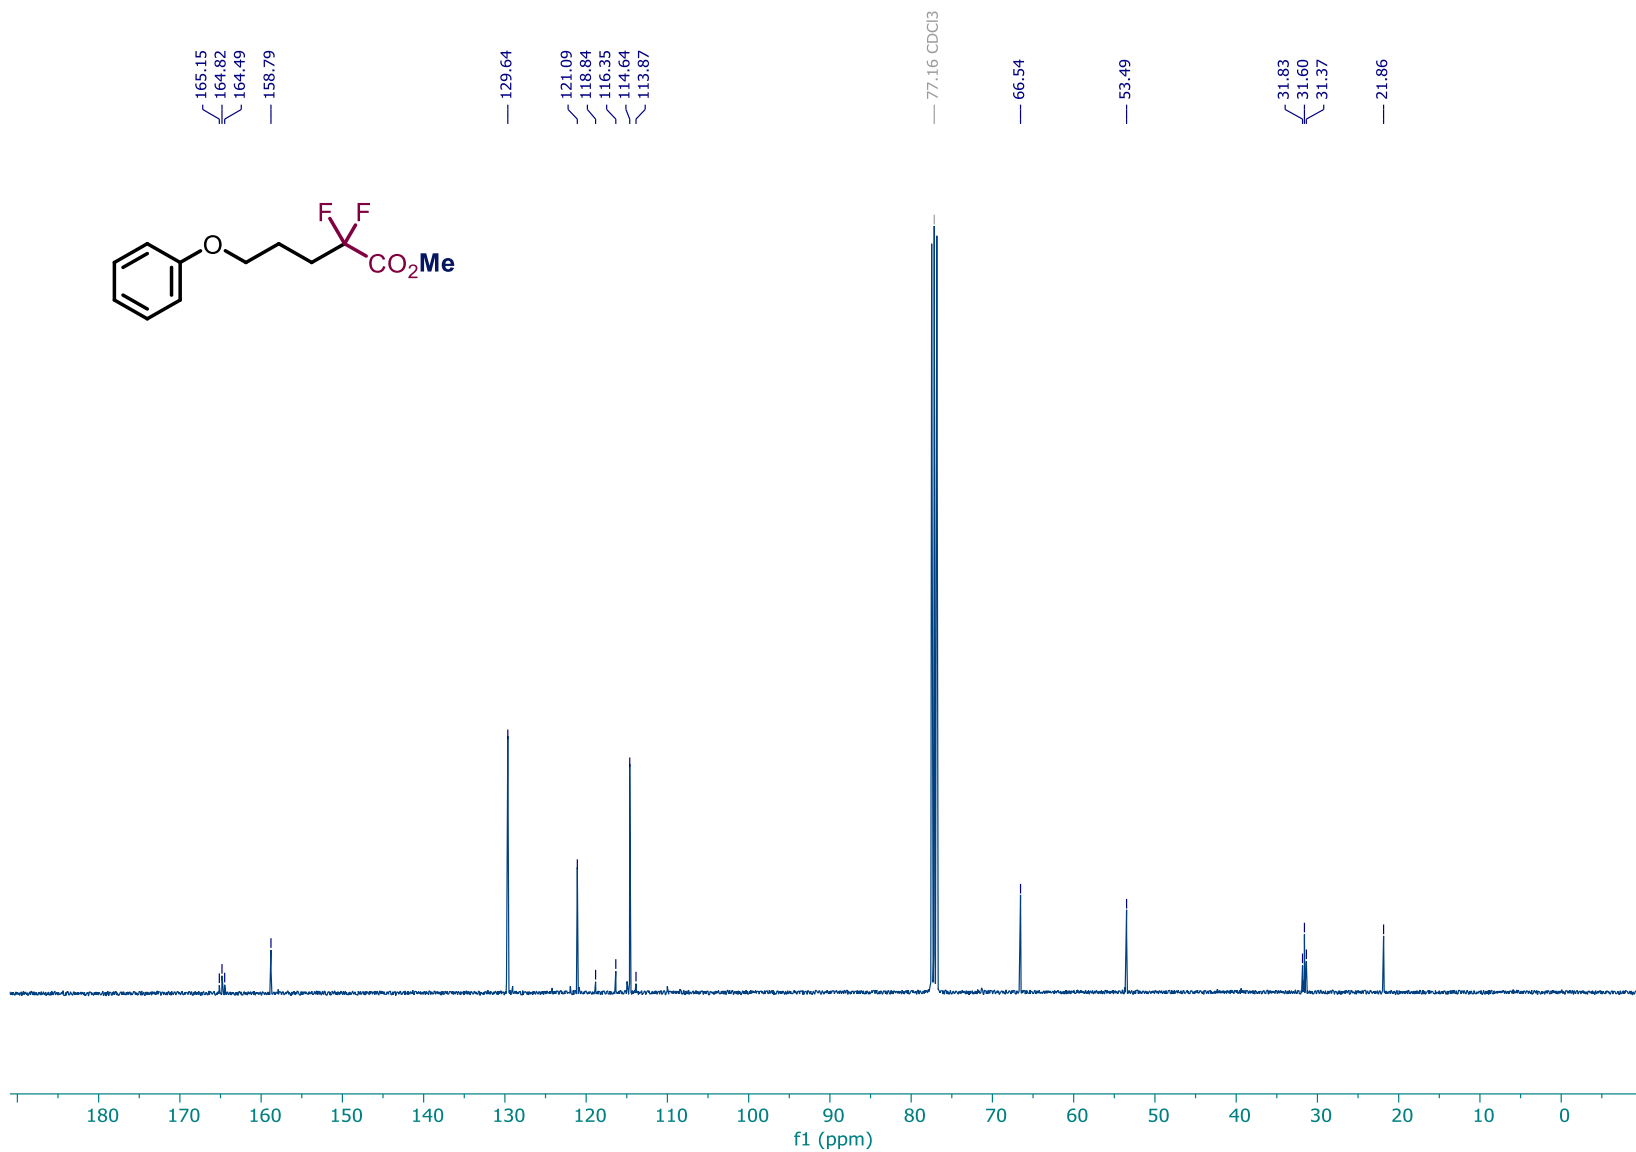

$^{19}\text{F}$  NMR (376 MHz,  $\text{CDCl}_3$ ) of **25**

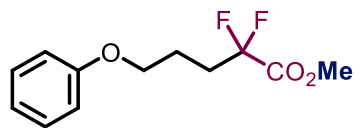

-105.81  
-105.86  
-105.90

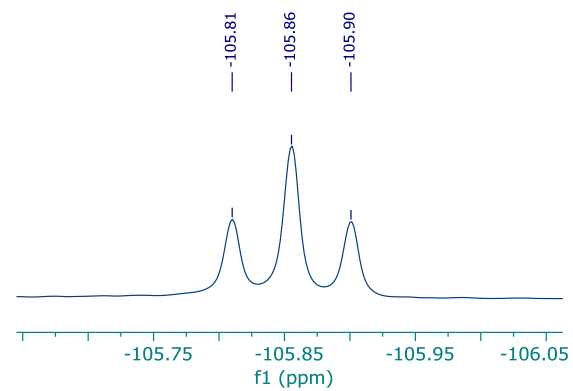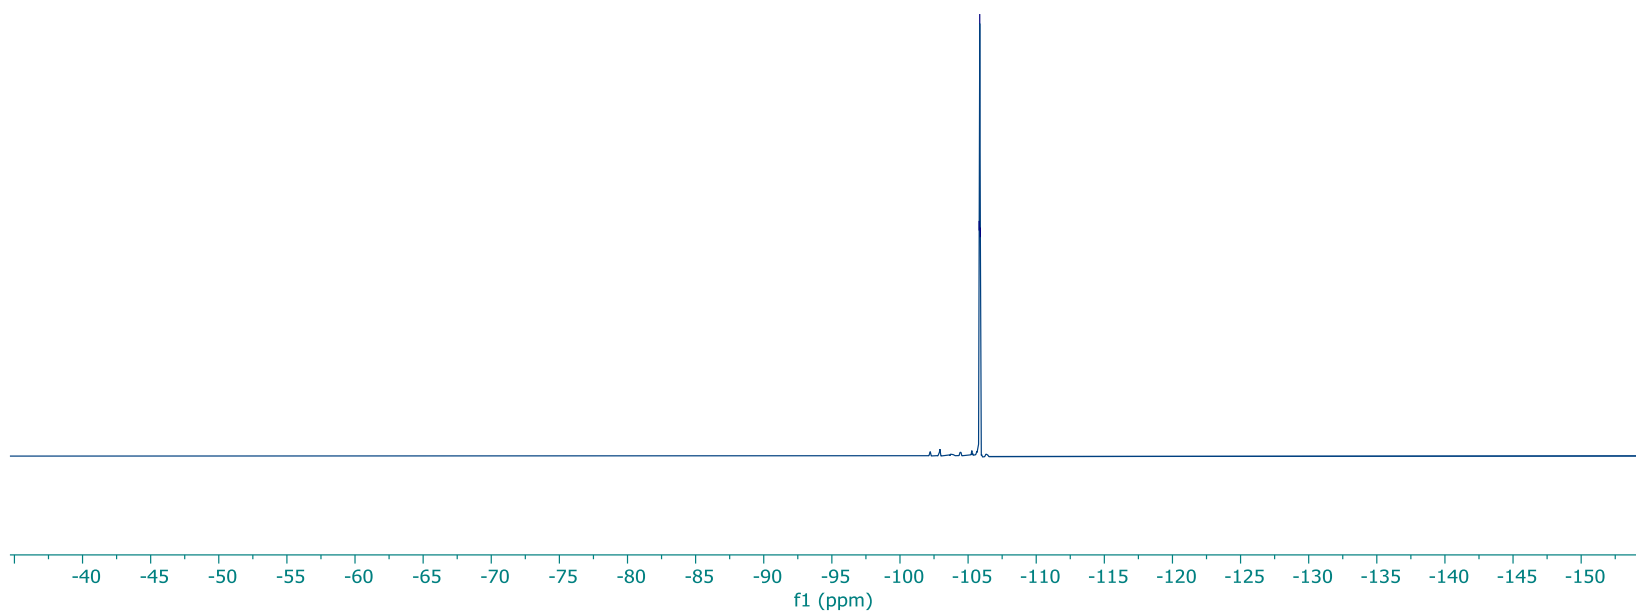



<sup>1</sup>H NMR (300 MHz, CDCl<sub>3</sub>) of **26**

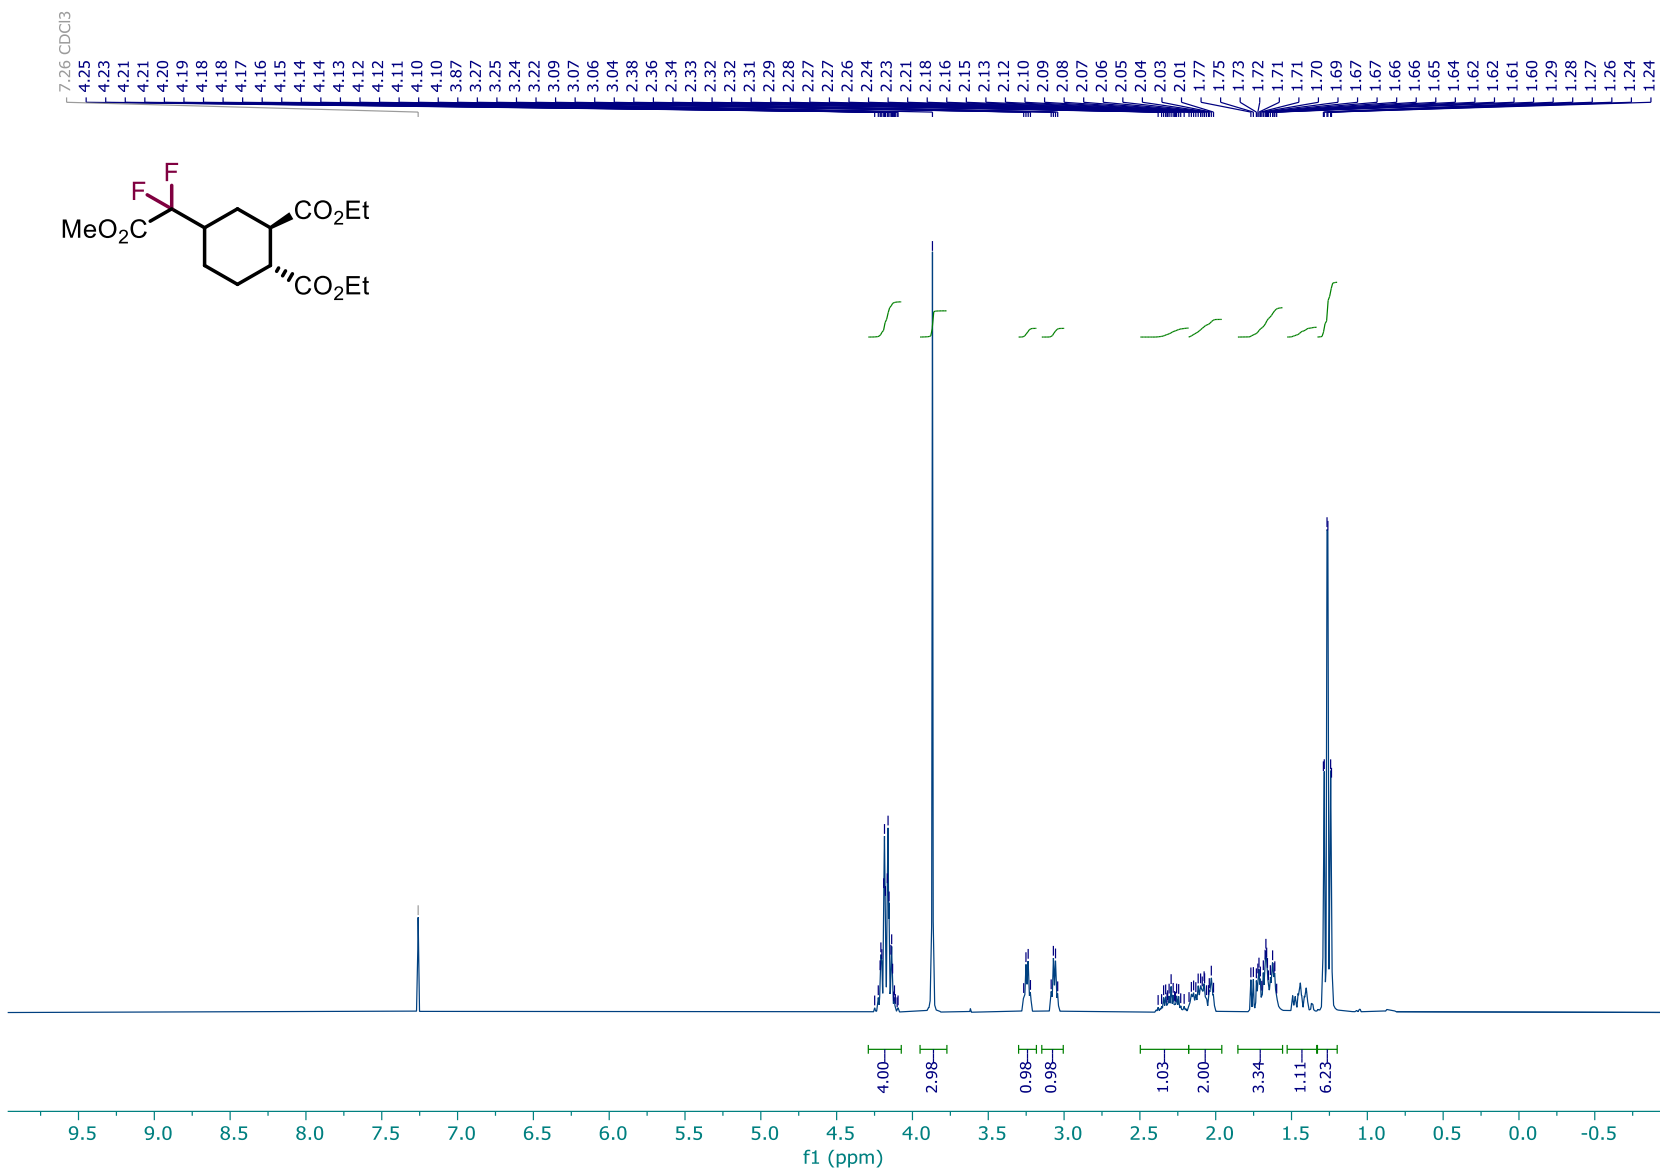

$^{13}\text{C}$  NMR (101 MHz,  $\text{CDCl}_3$ ) of **26**

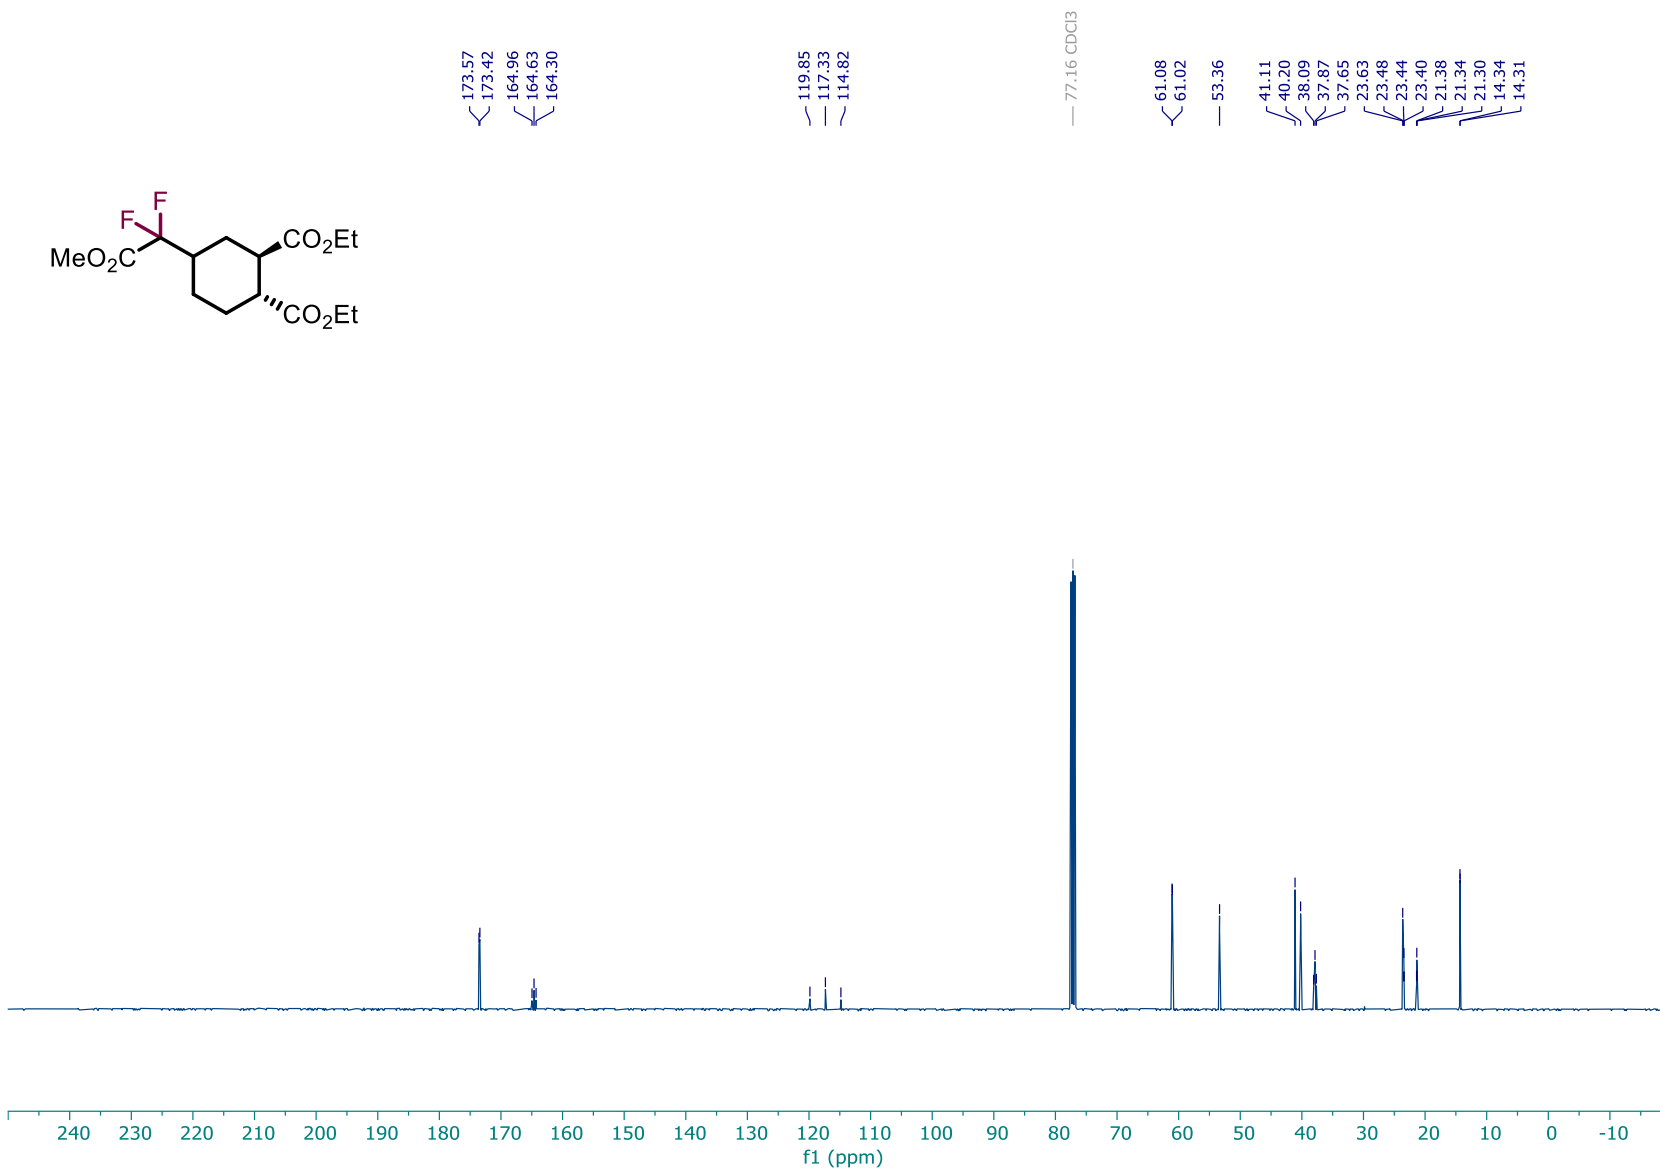

$^{19}\text{F}$  NMR (282 MHz,  $\text{CDCl}_3$ ) of **26**

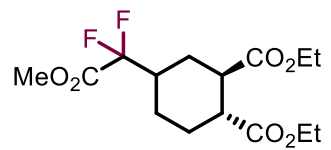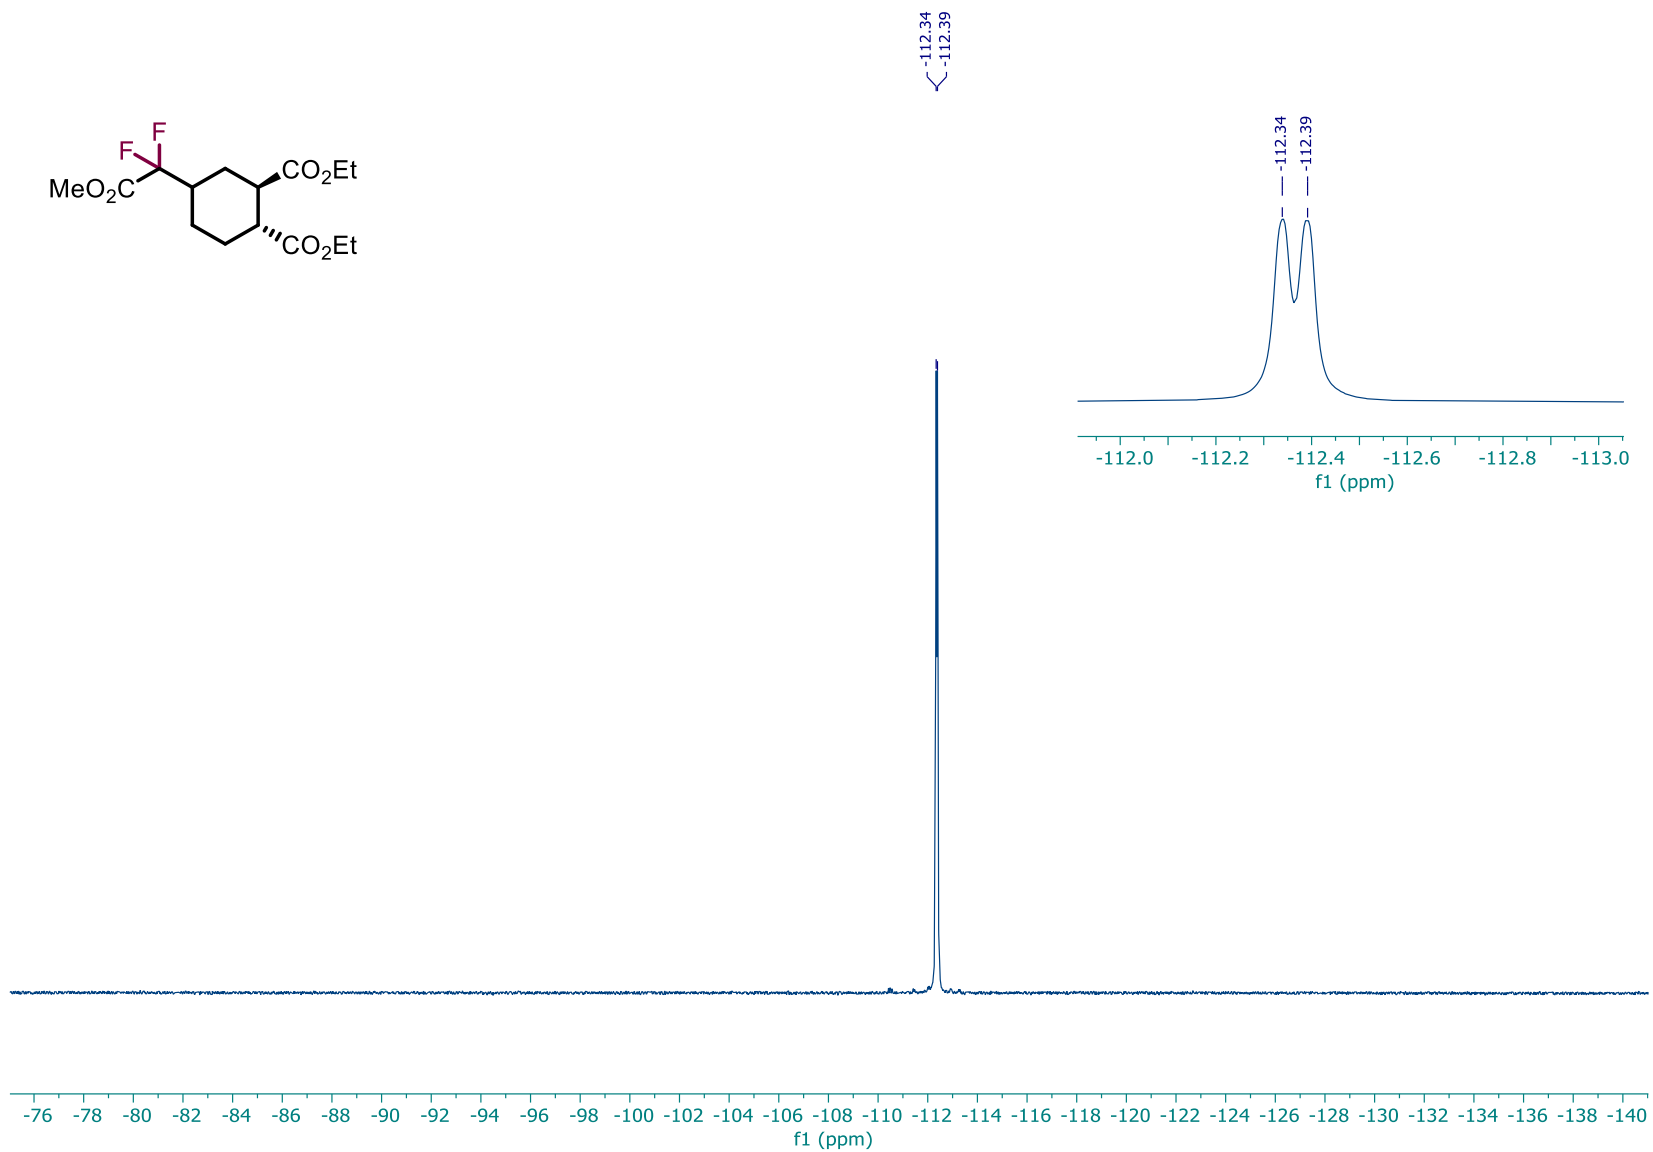

<sup>1</sup>H NMR (400 MHz, CDCl<sub>3</sub>) of **27**

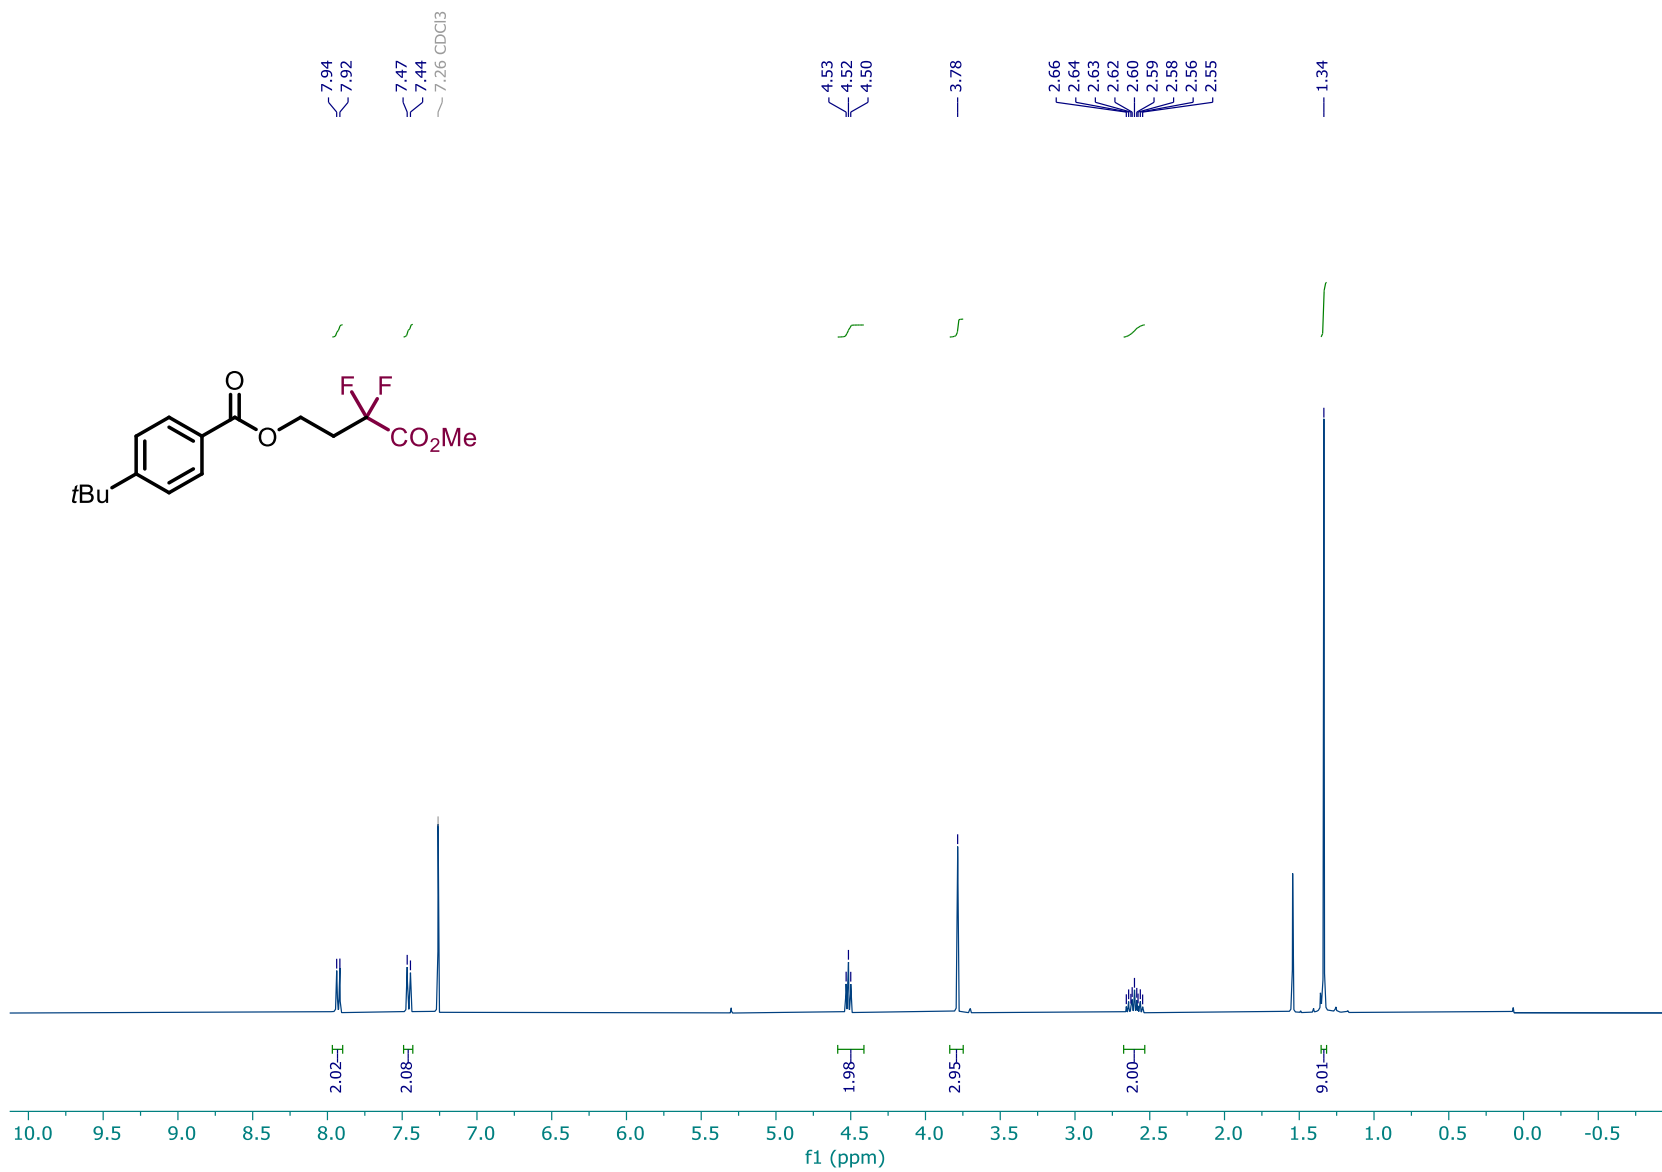

$^{13}\text{C}$  NMR (101 MHz,  $\text{CDCl}_3$ ) of **27**

024762.11.fid

C13CPD\_STD  $\text{CDCl}_3$  /opt service 7

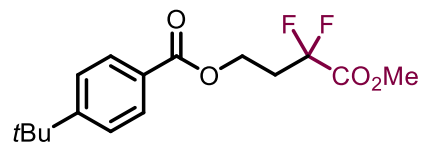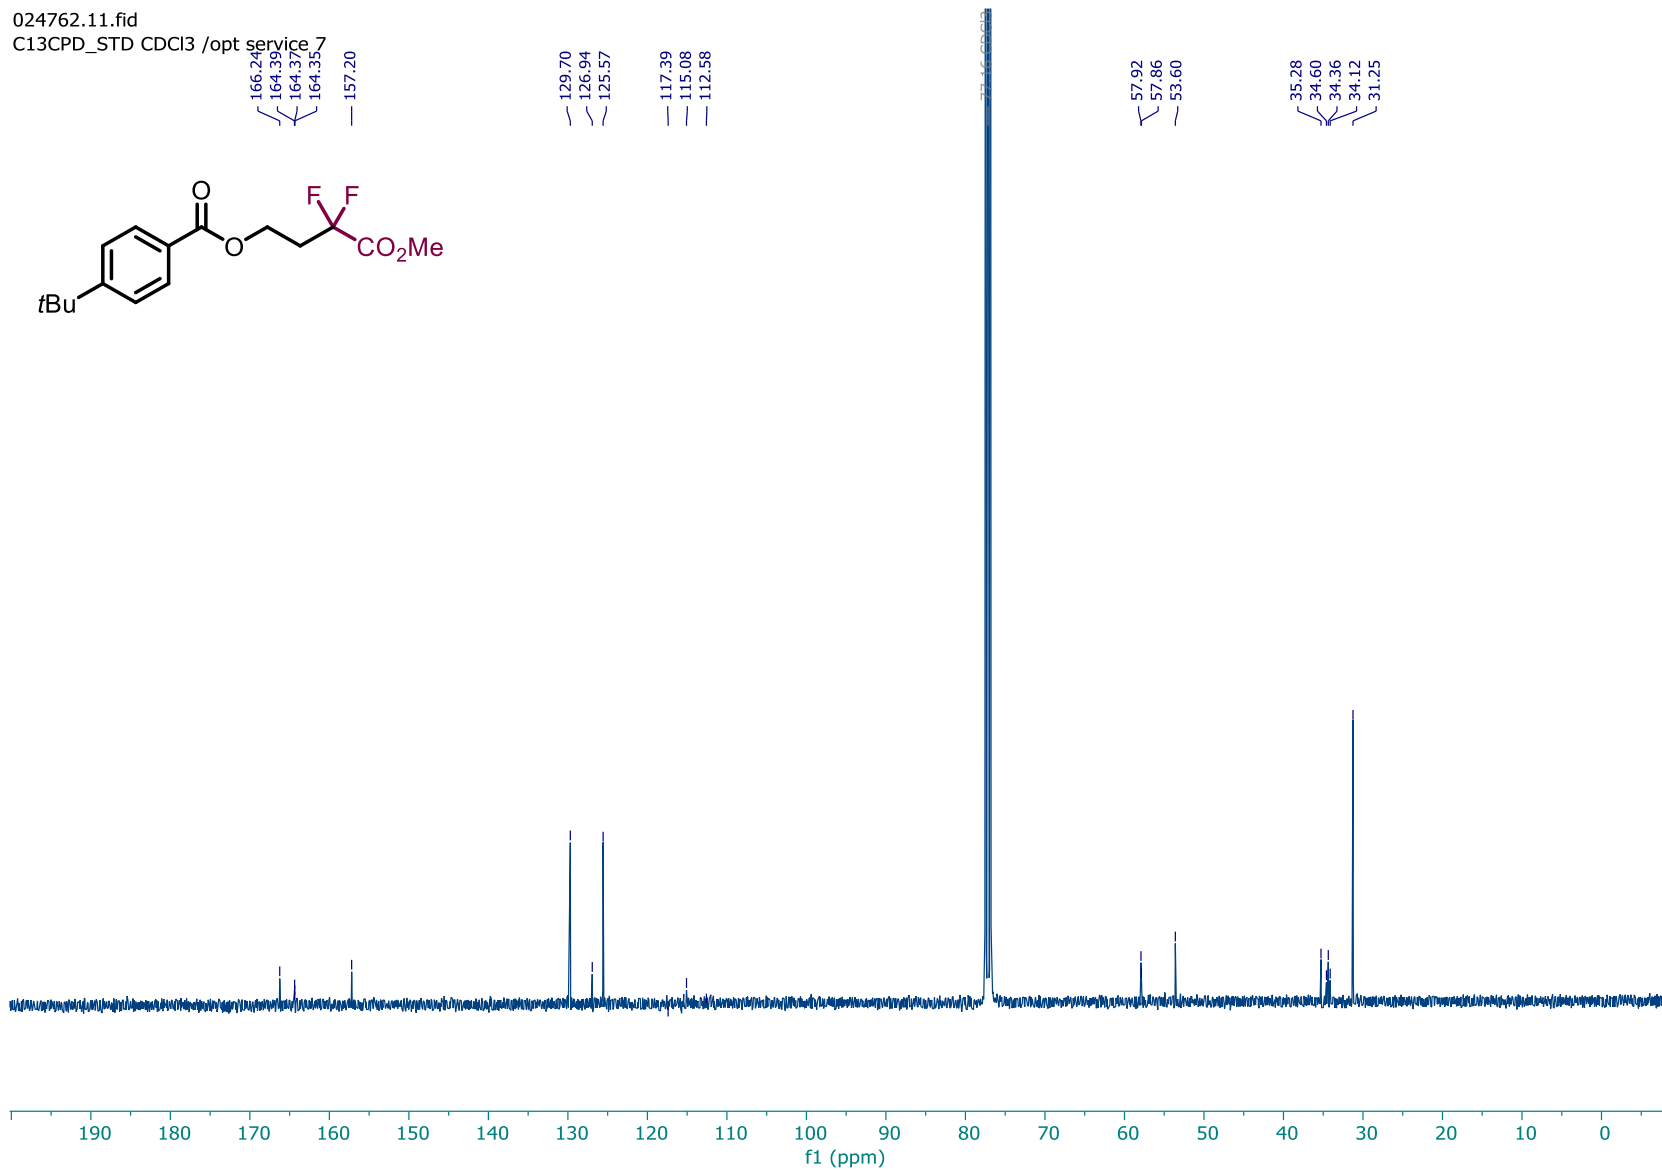

$^{19}\text{F}$  NMR (376 MHz,  $\text{CDCl}_3$ ) of **27**

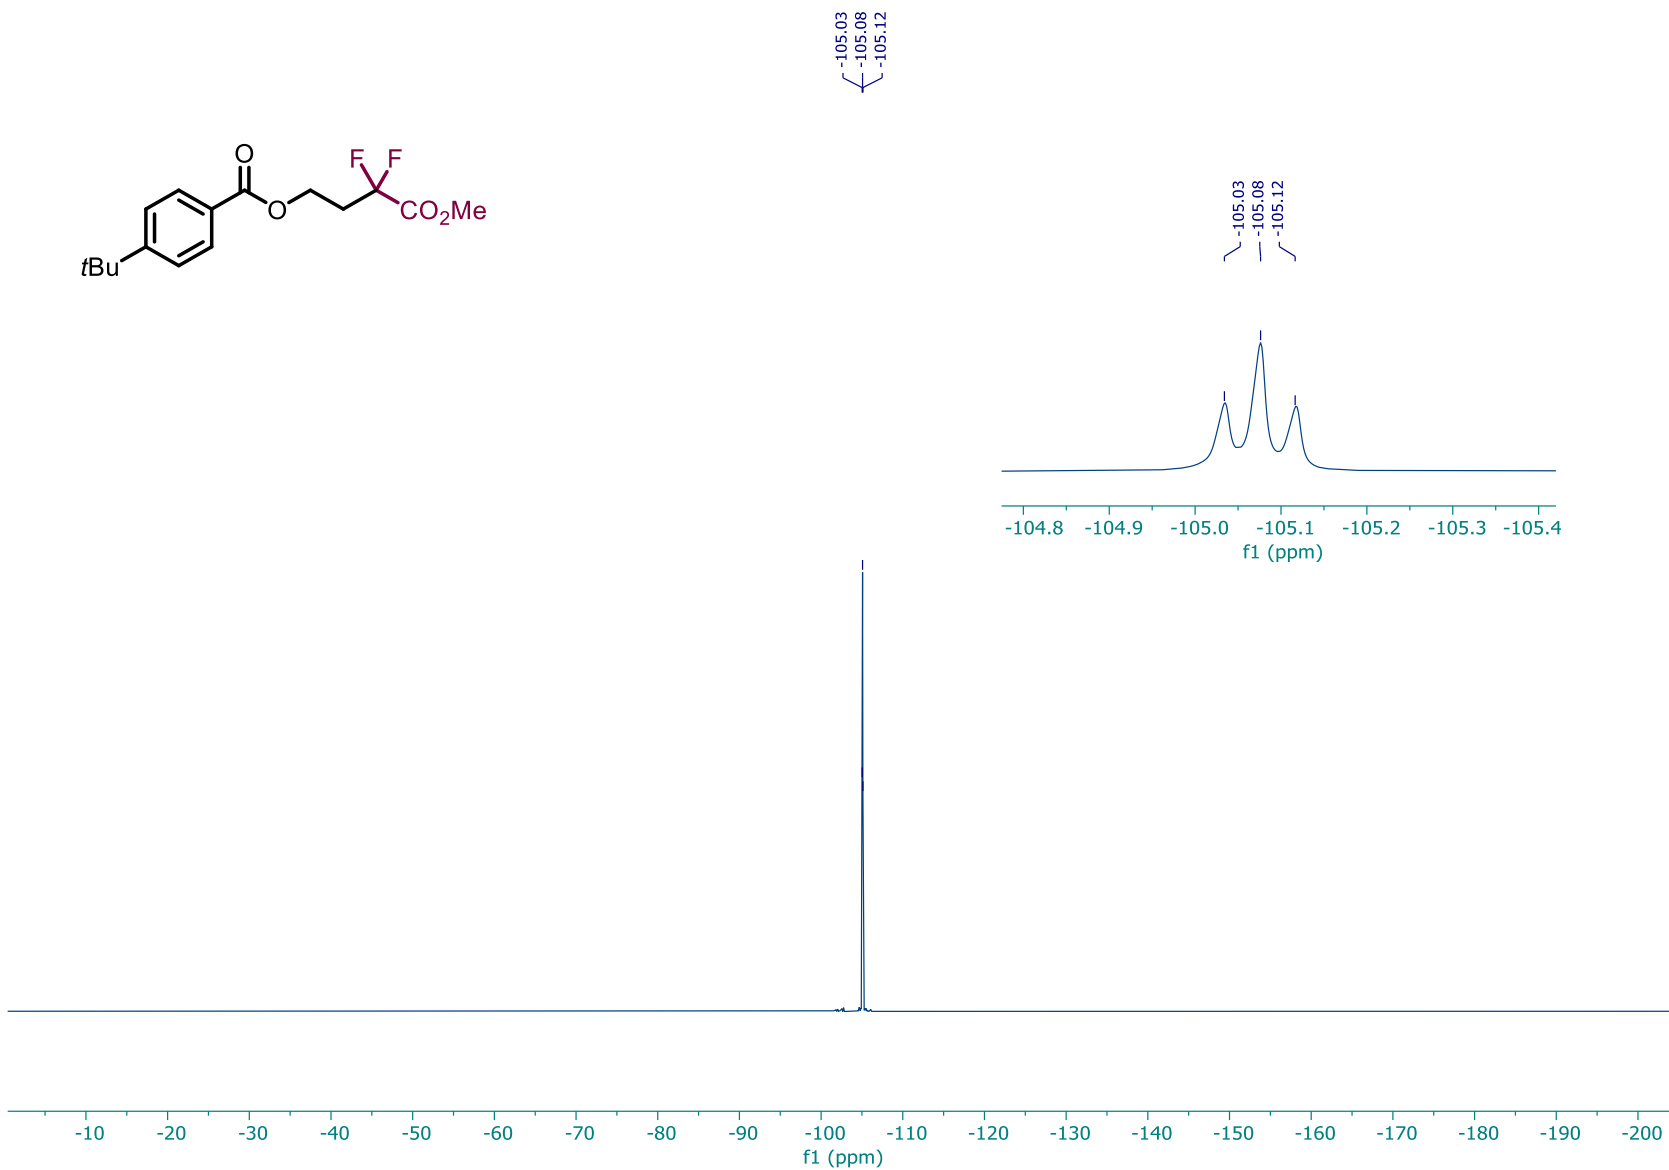

<sup>1</sup>H NMR (400 MHz, CDCl<sub>3</sub>) of **28**

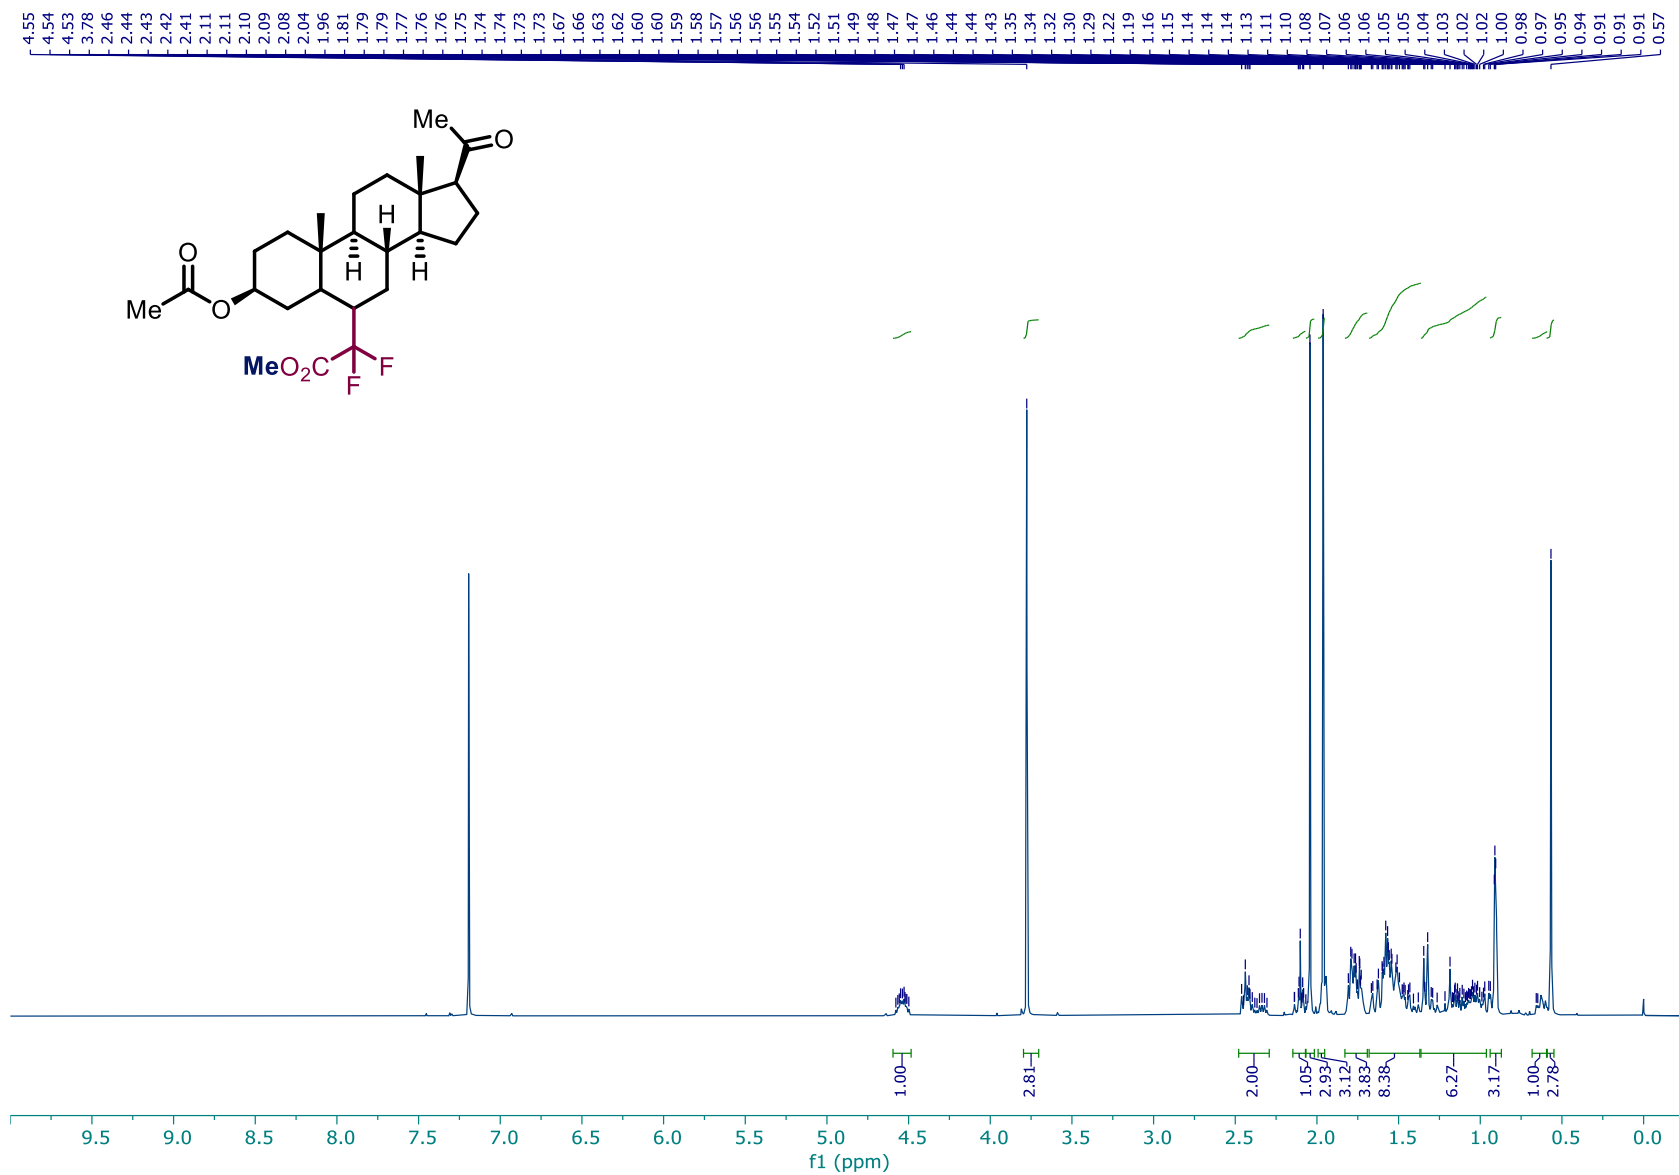

$^{13}\text{C}$  NMR (101 MHz,  $\text{CDCl}_3$ ) of **28**

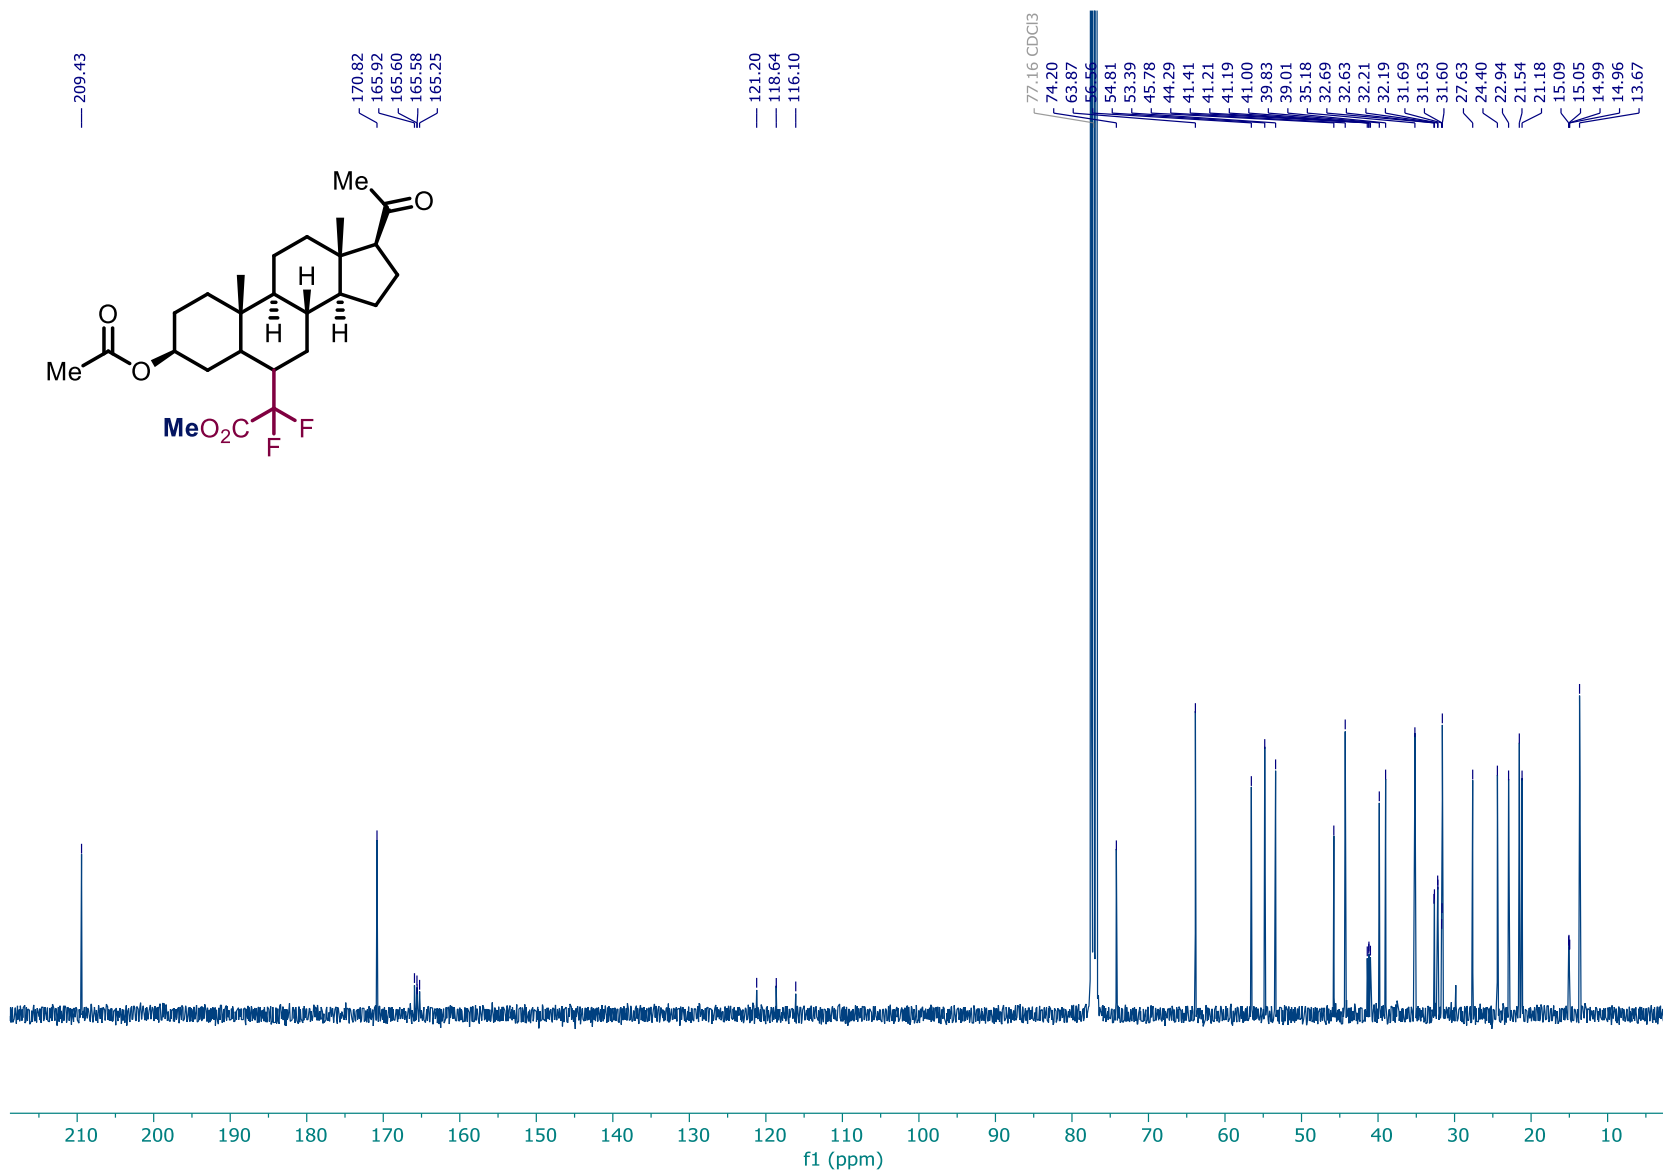



$^{19}\text{F}$  NMR (376 MHz,  $\text{CDCl}_3$ ) of **28**

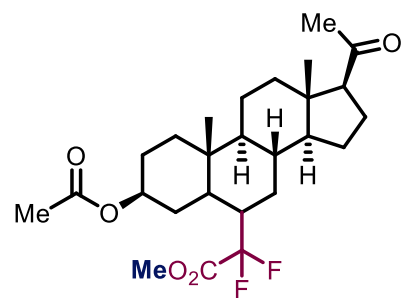

-99.42  
-99.45  
-100.10  
-100.13  
-102.88  
-103.48  
-103.56

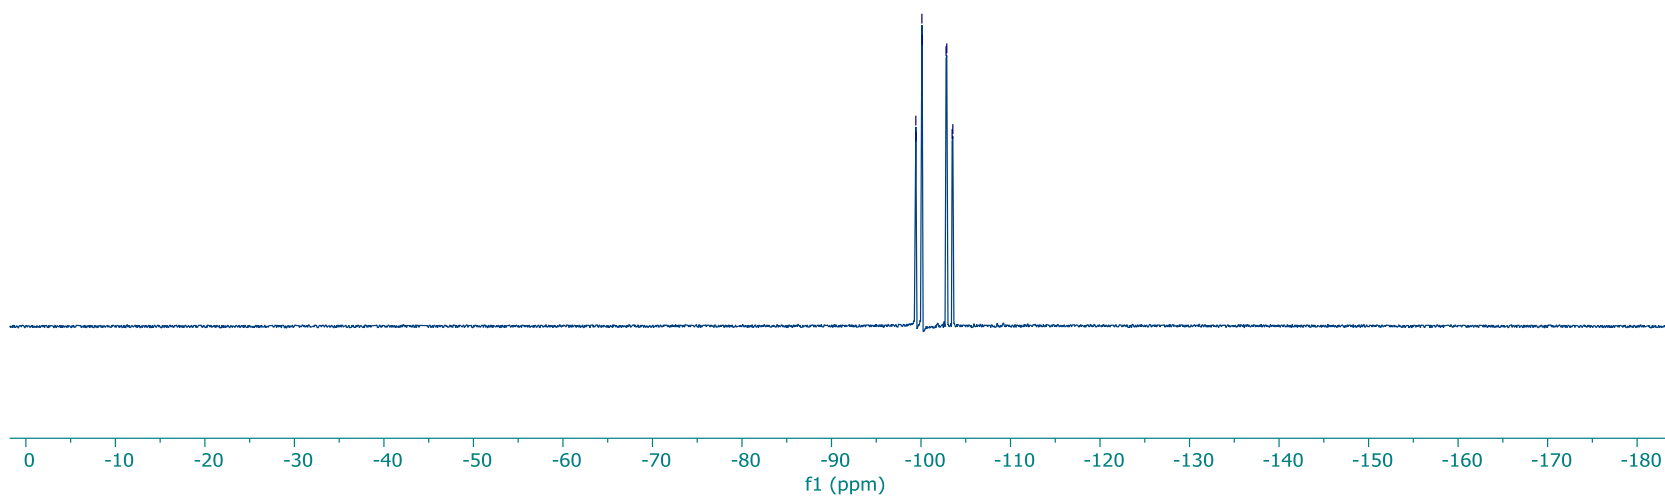

<sup>1</sup>H NMR (400 MHz, CDCl<sub>3</sub>) of **29**

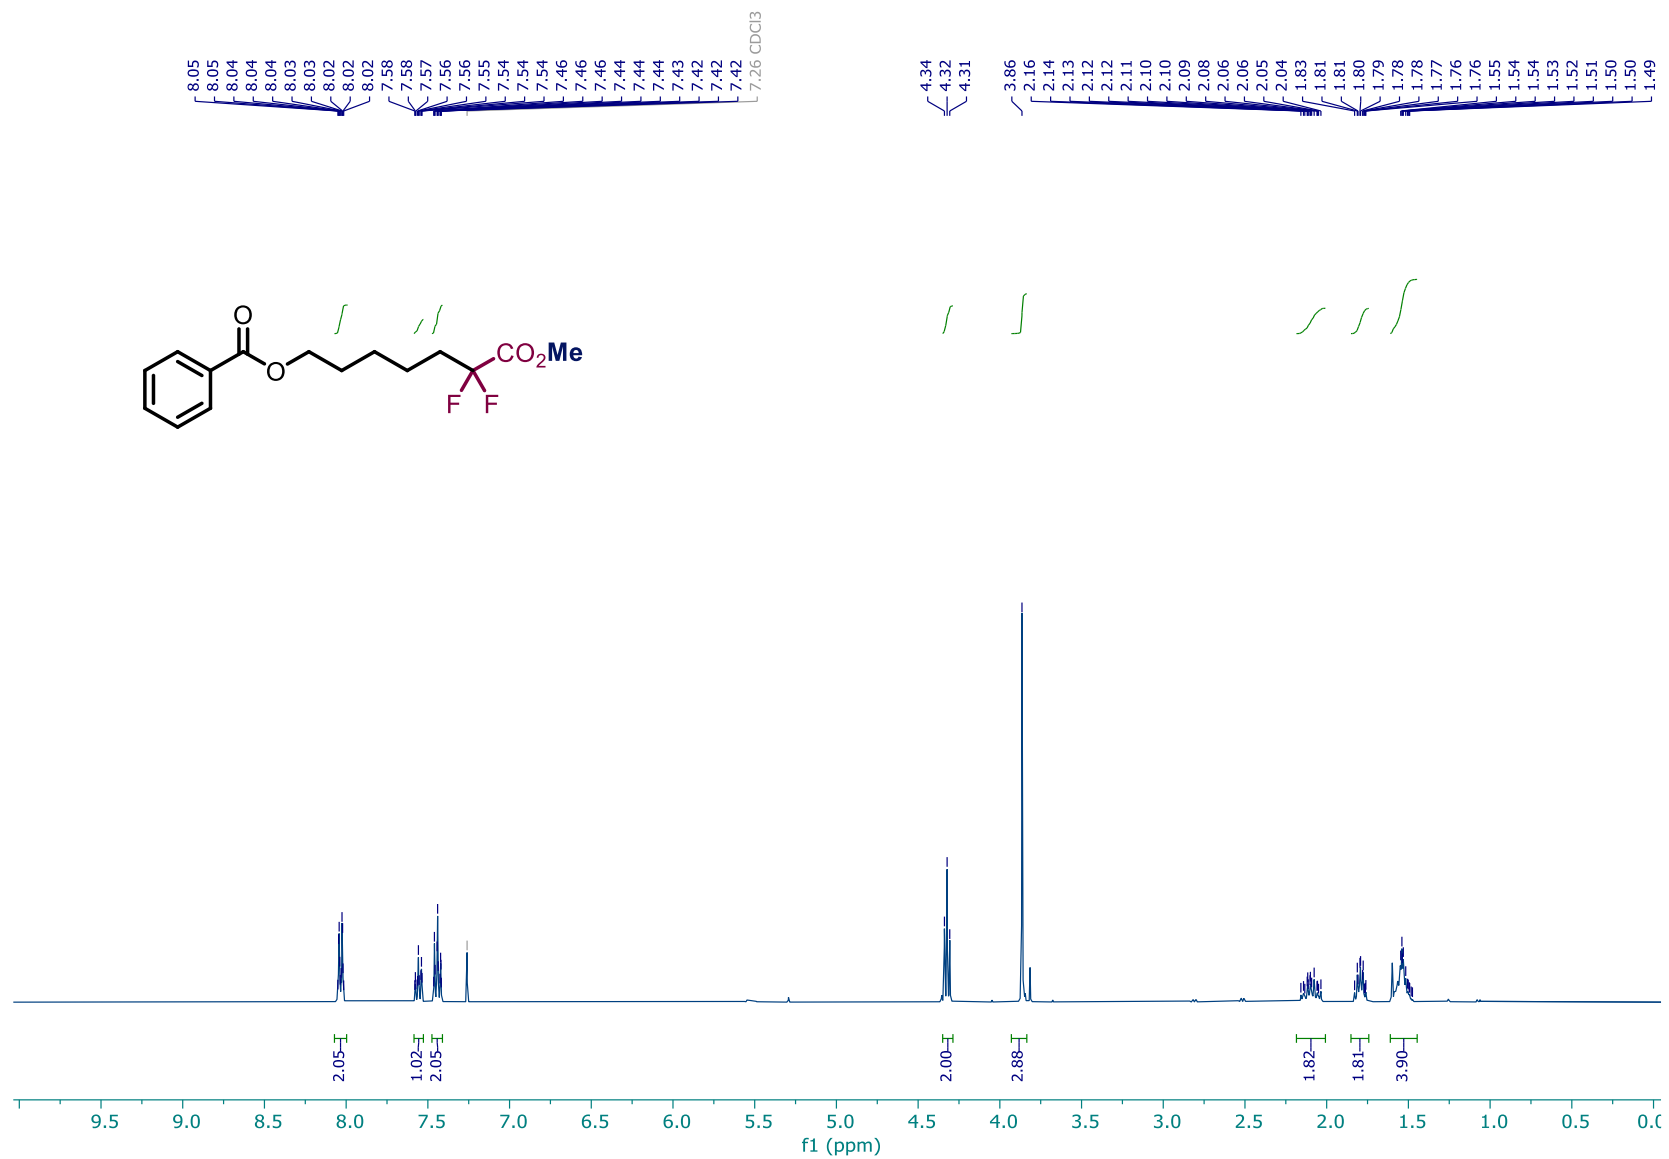

$^{13}\text{C}$  NMR (101 MHz,  $\text{CDCl}_3$ ) of **29**

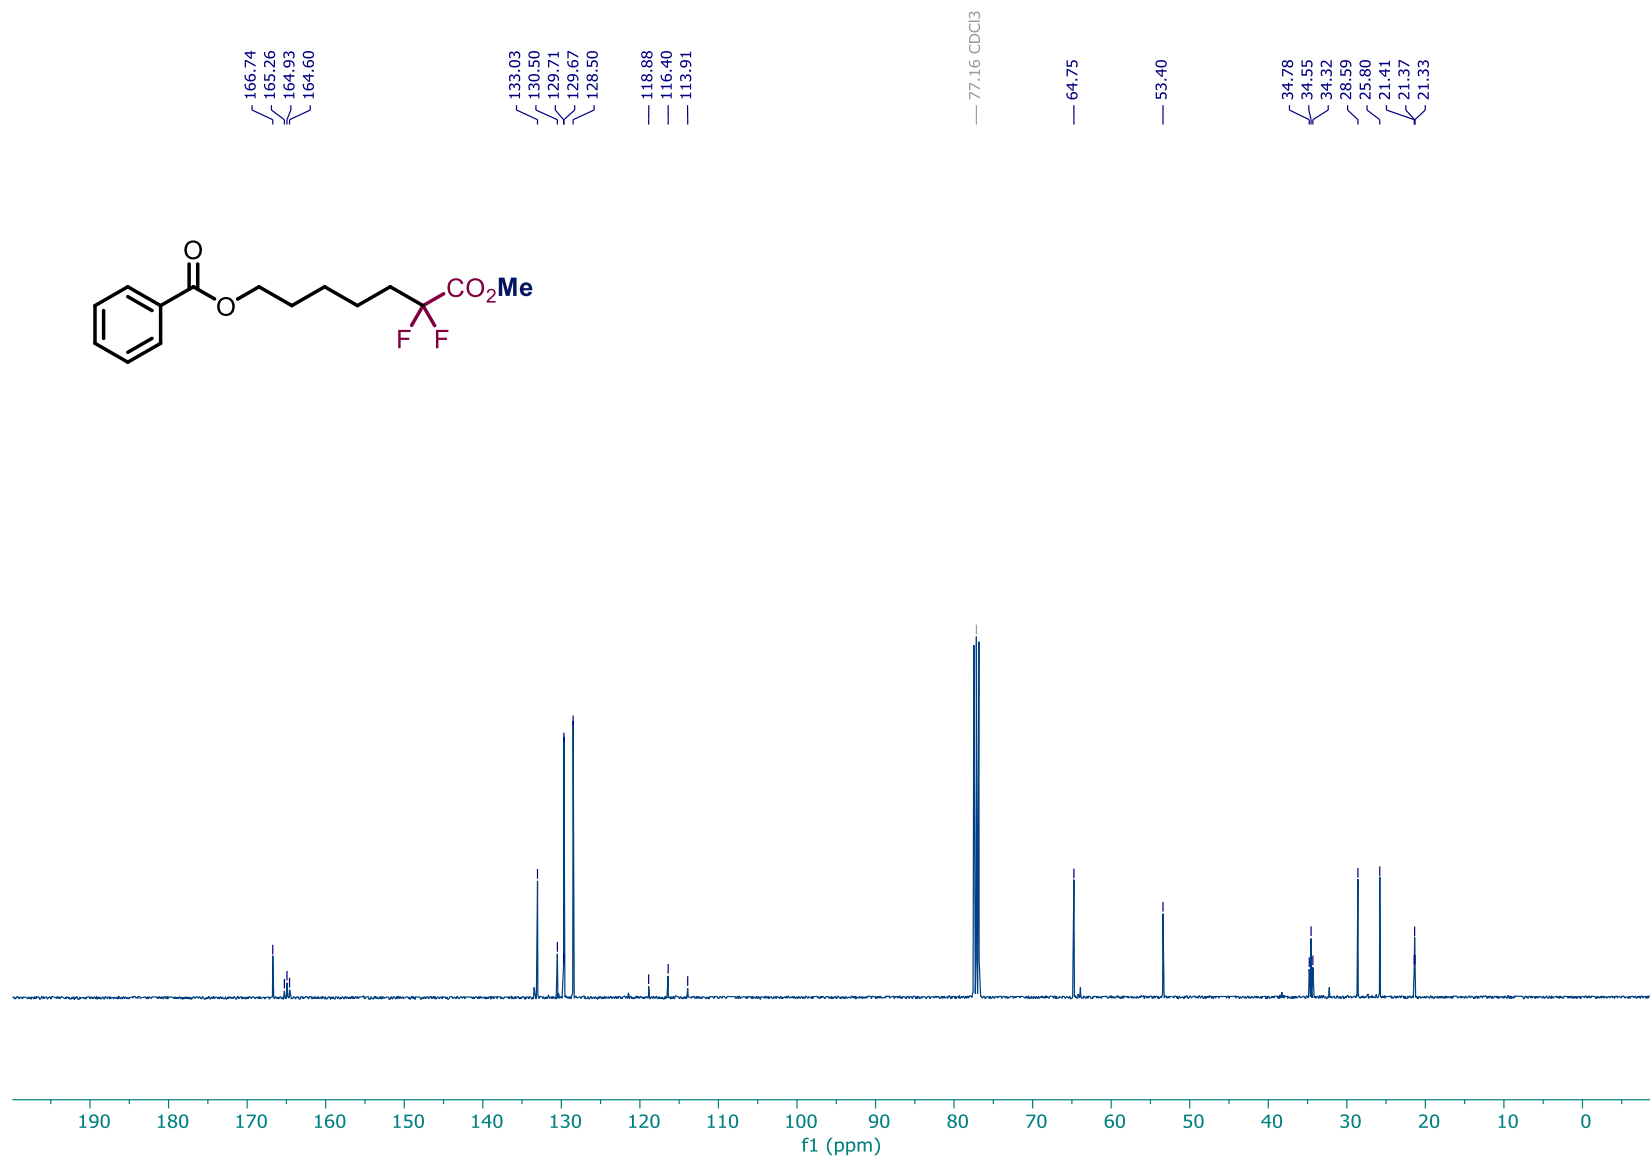

$^{19}\text{F}$  NMR (376 MHz,  $\text{CDCl}_3$ ) of **29**

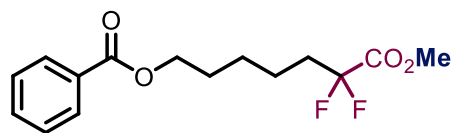

-105.67  
-105.72  
-105.76

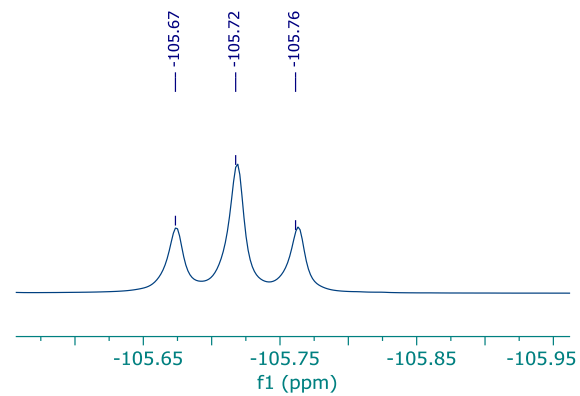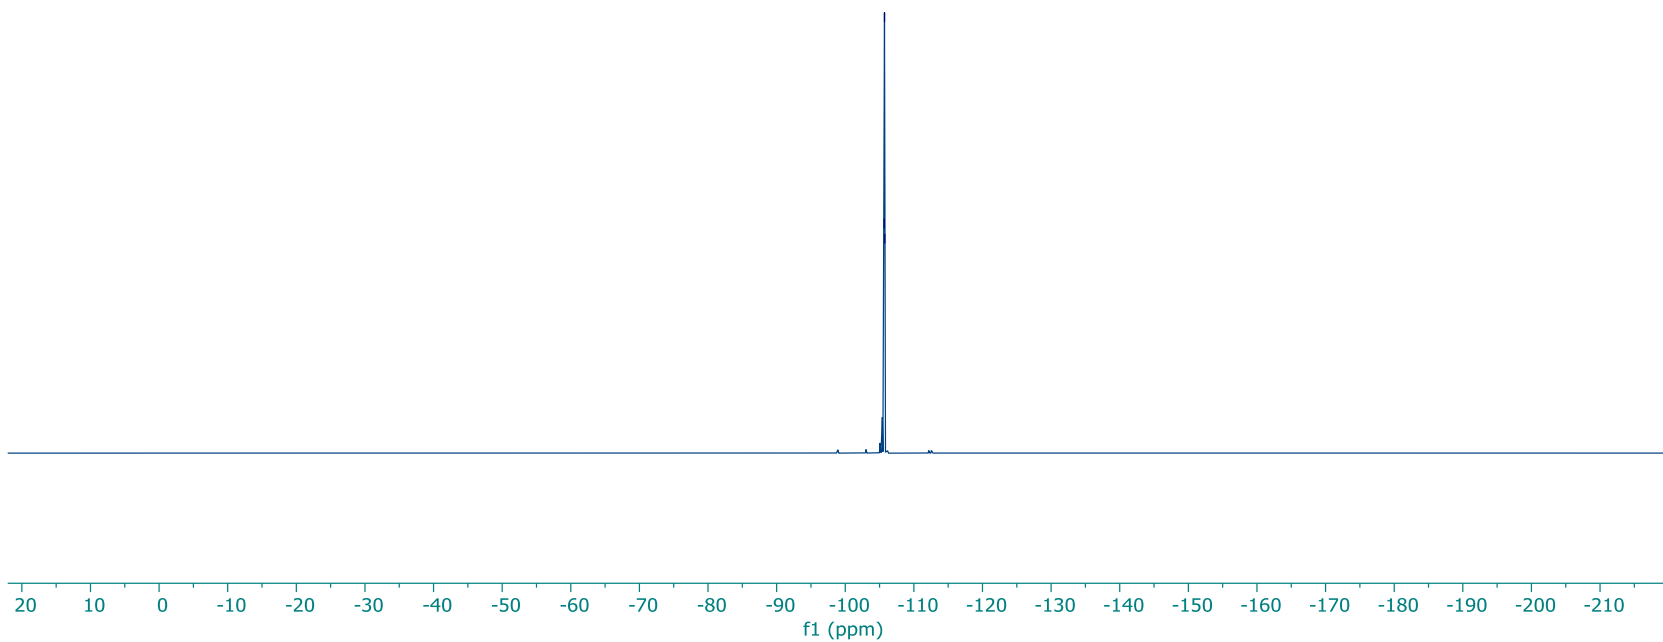

<sup>1</sup>H NMR (300 MHz, CDCl<sub>3</sub>) of **30**

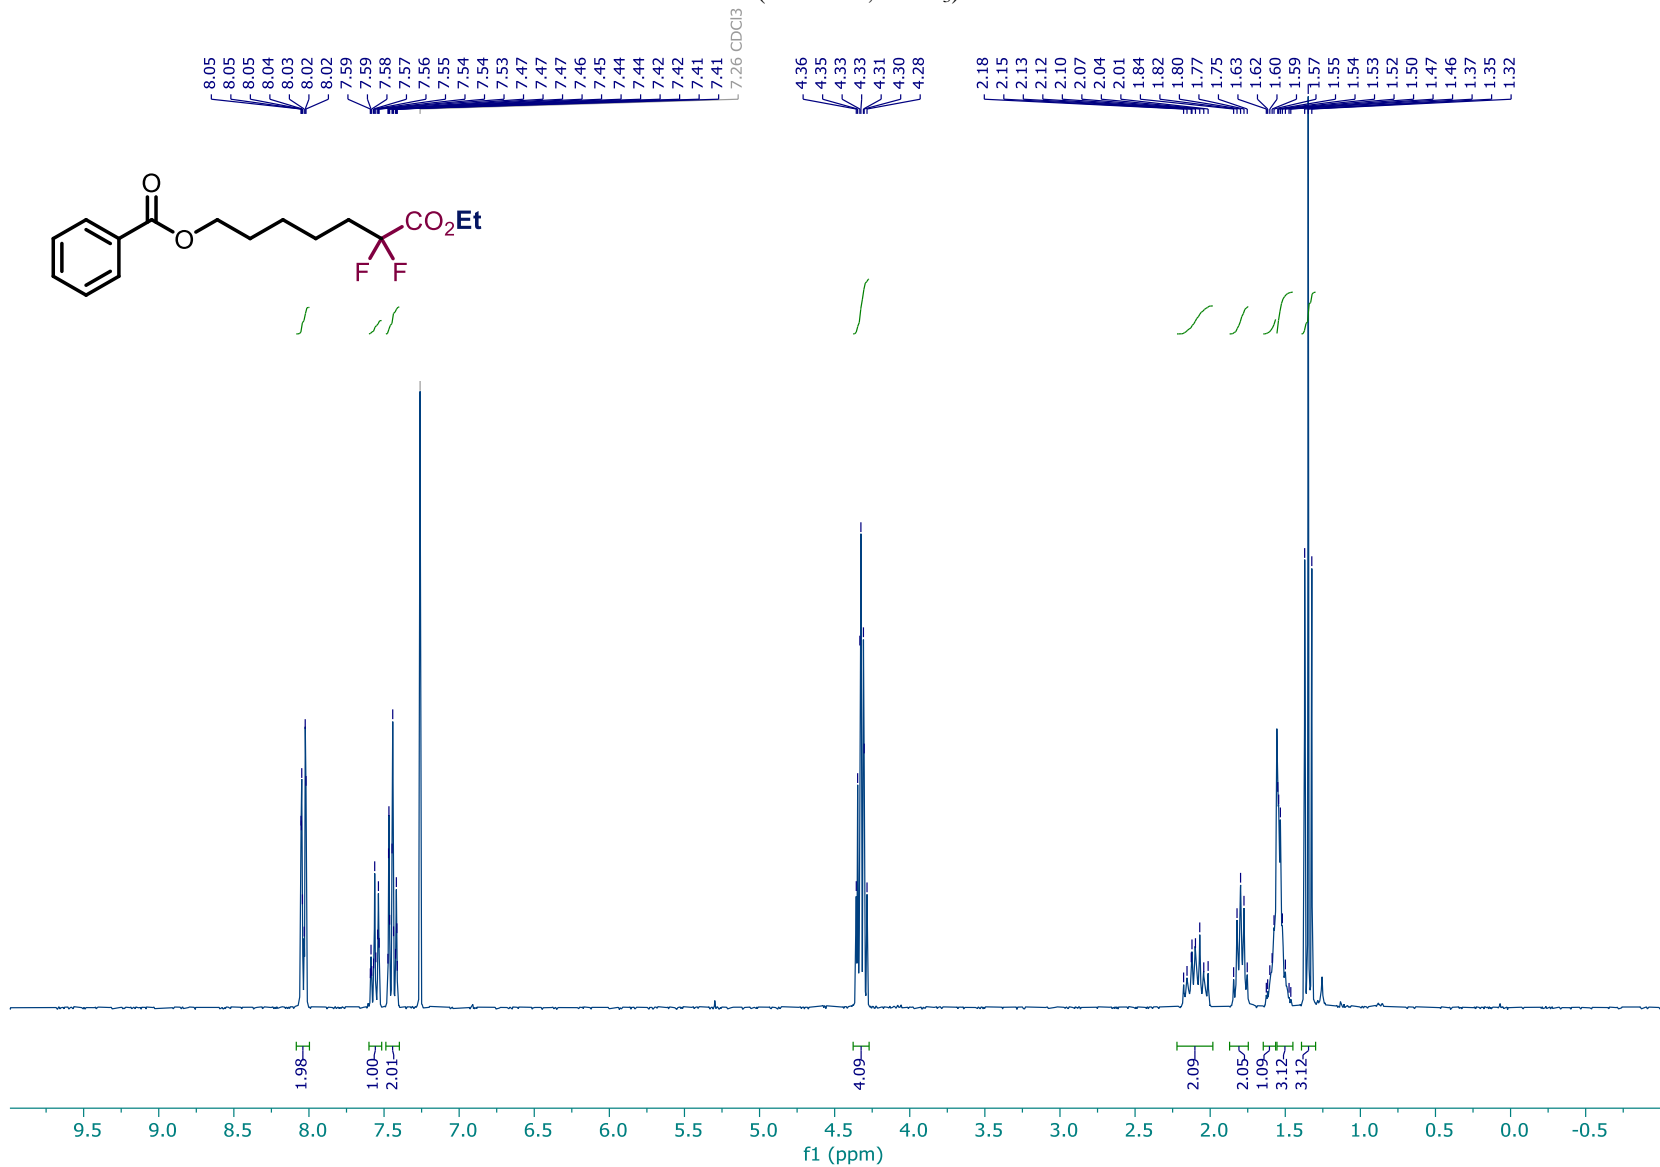

$^{19}\text{F}$  NMR (282 MHz,  $\text{CDCl}_3$ ) of **30**

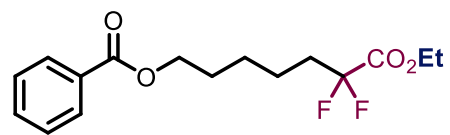

-105.90  
-105.96  
-106.02

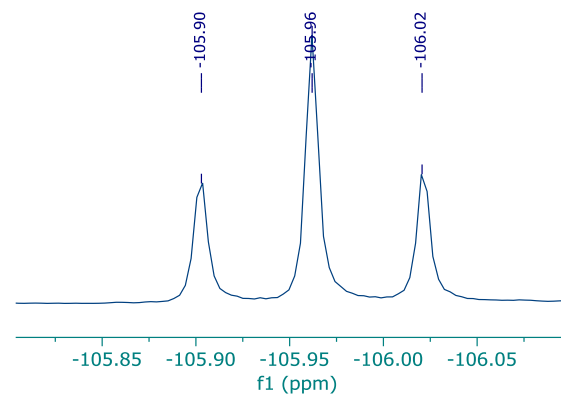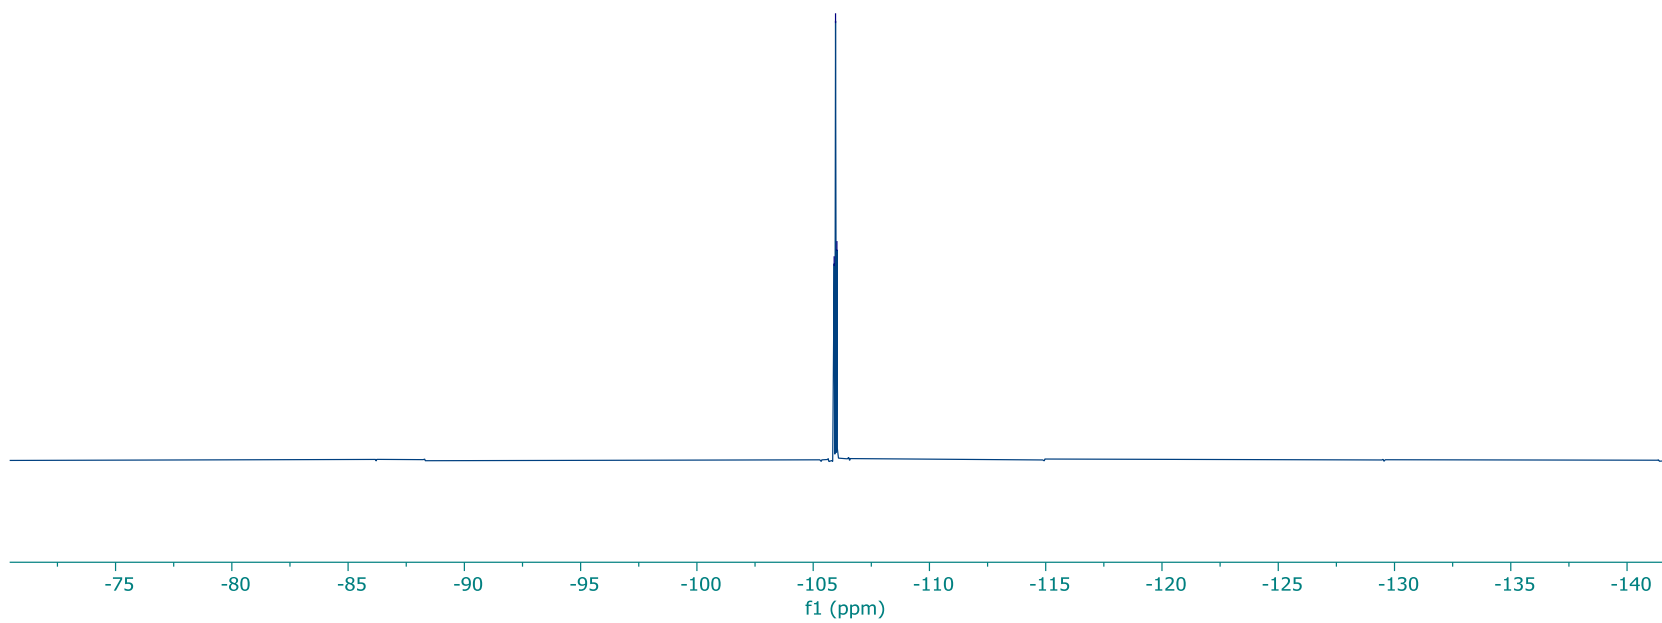

<sup>1</sup>H NMR (400 MHz, CDCl<sub>3</sub>) of **31**

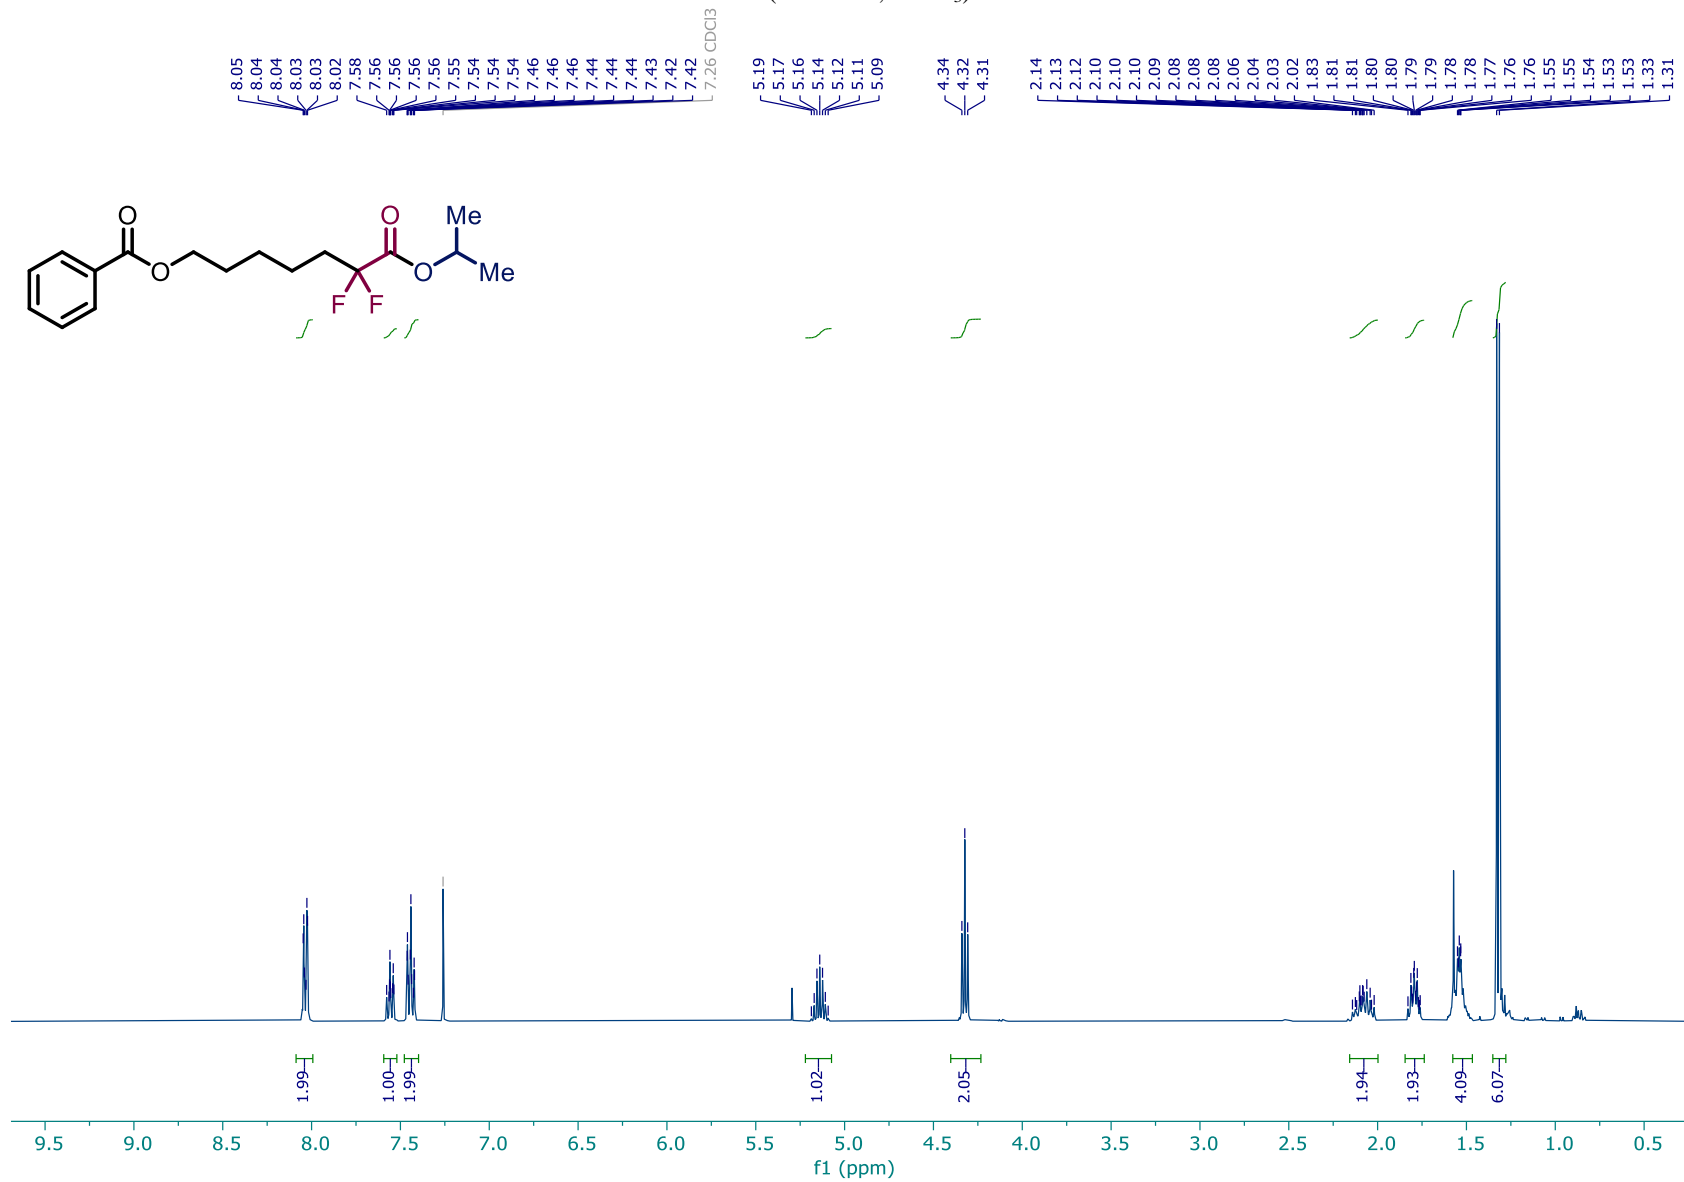

$^{13}\text{C}$  NMR (101 MHz,  $\text{CDCl}_3$ ) of **31**

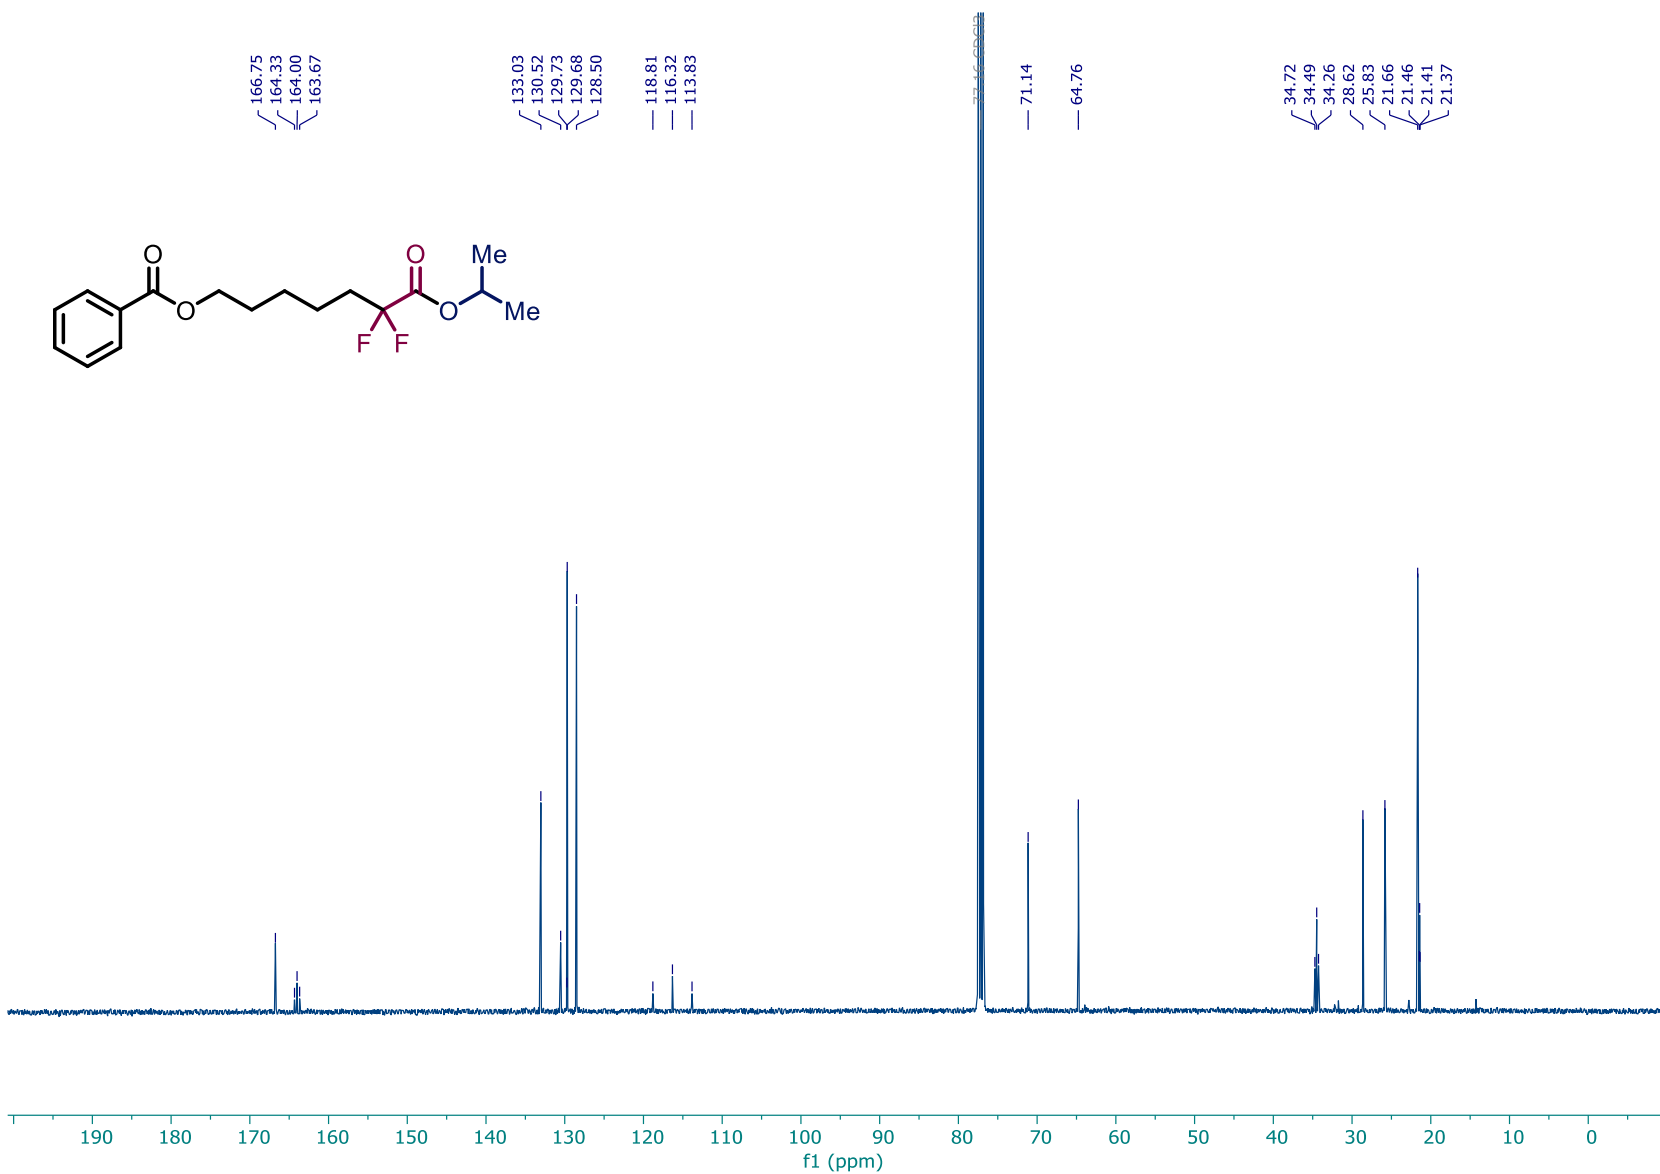



$^{19}\text{F}$  NMR (376 MHz,  $\text{CDCl}_3$ ) of **31**

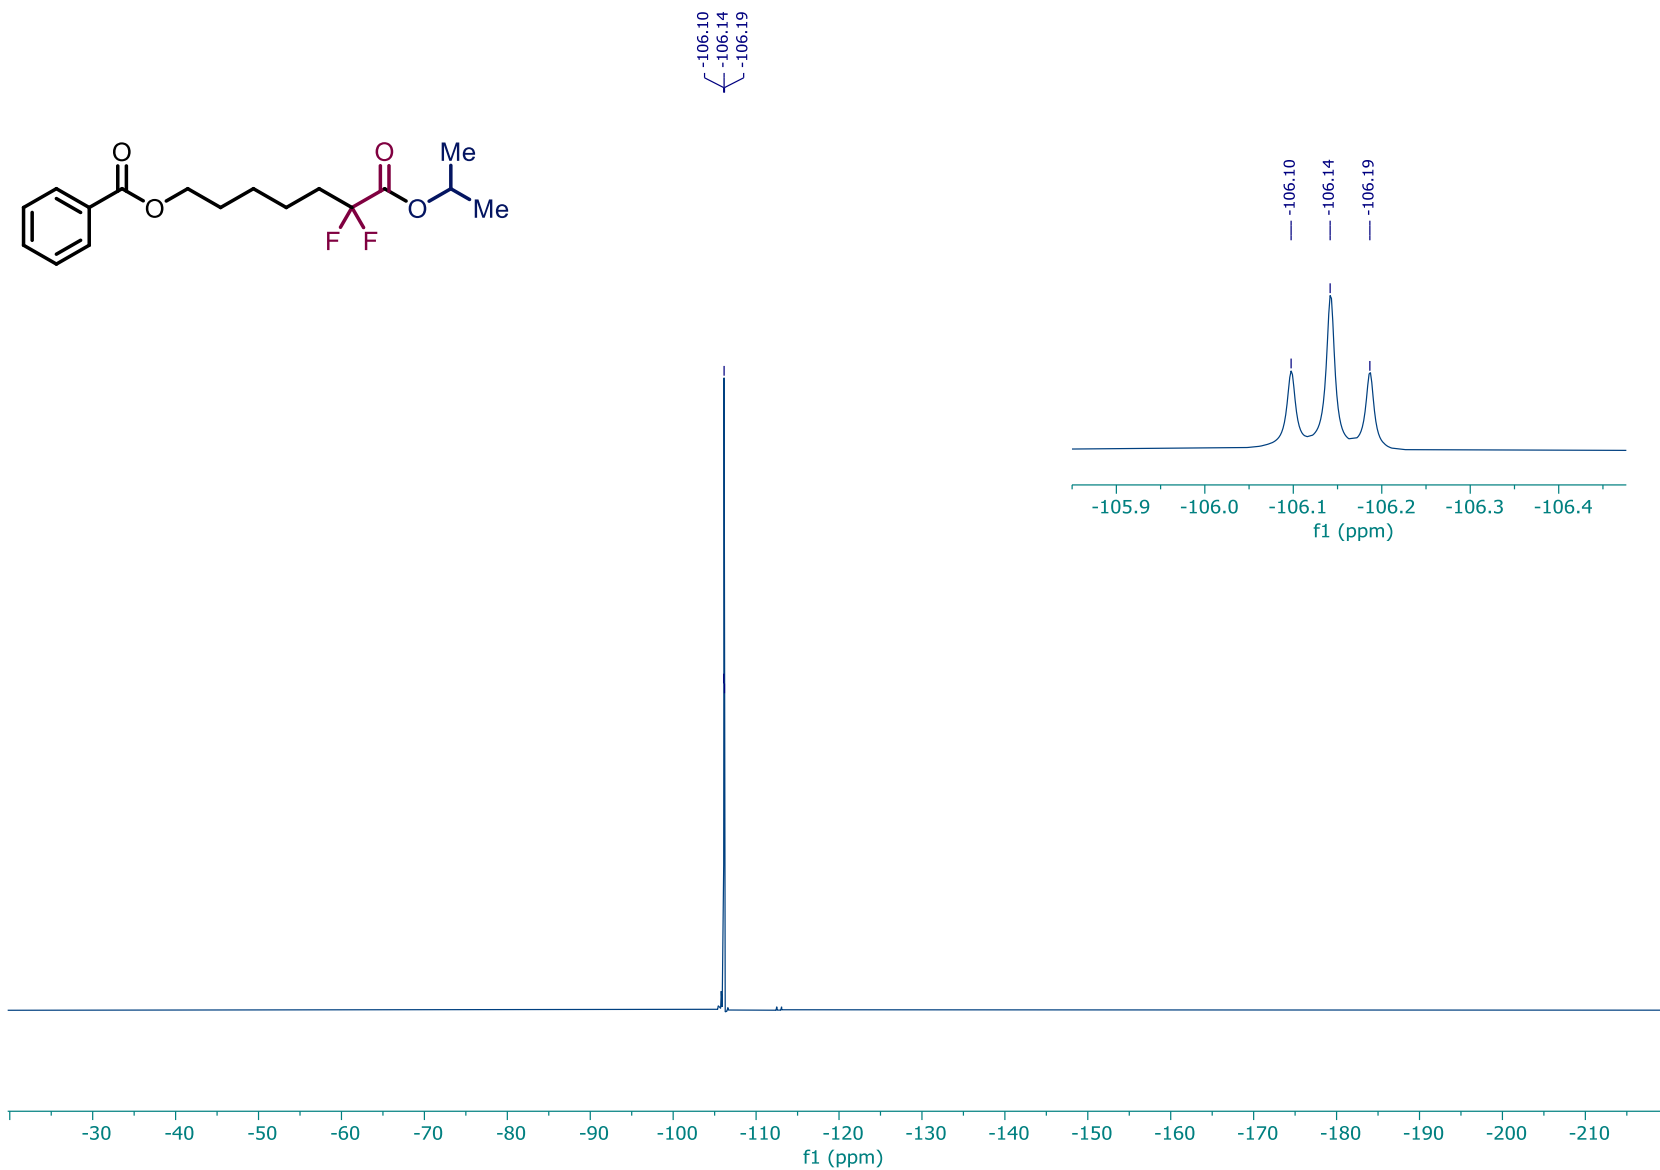

<sup>1</sup>H NMR (400 MHz, CDCl<sub>3</sub>) of **32**

024764.10.fid

H1\_STD CDCl<sub>3</sub> /opt service 23

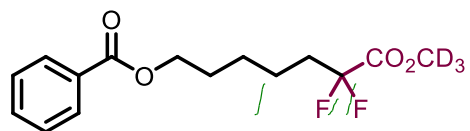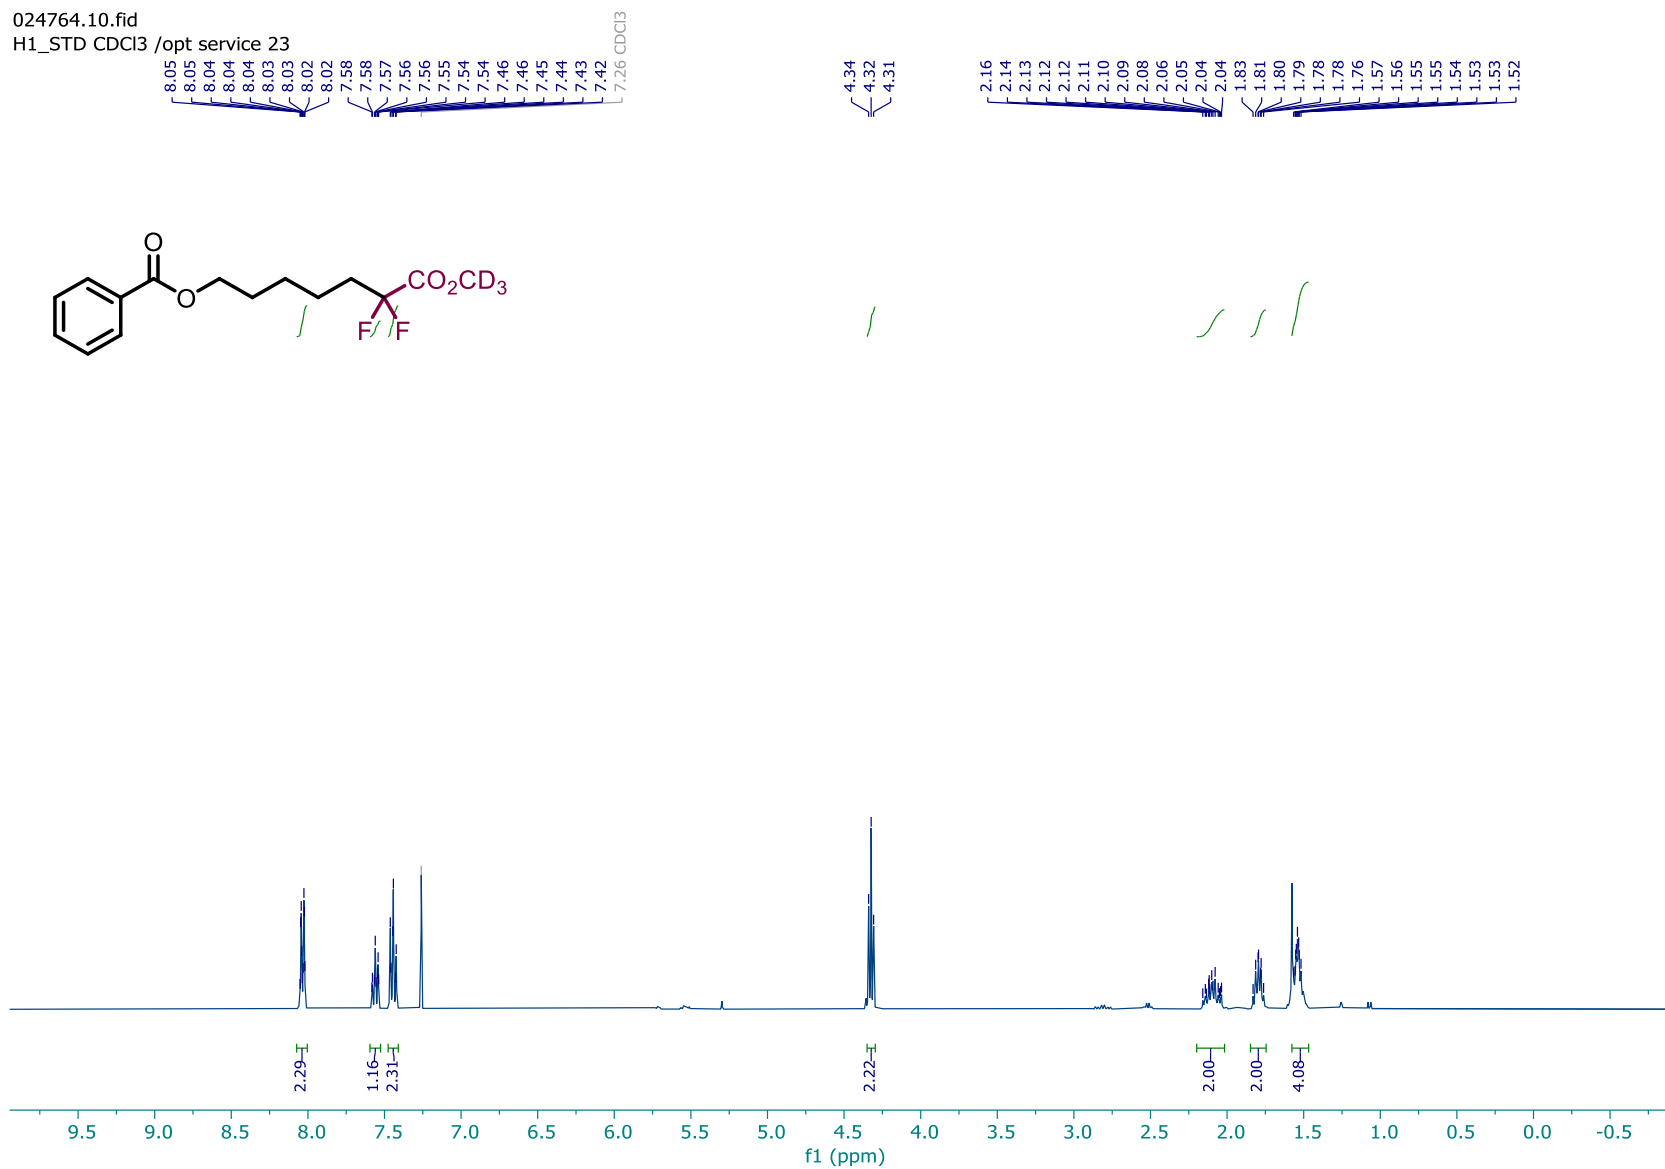

$^{13}\text{C}$  NMR (101 MHz,  $\text{CDCl}_3$ ) of **32**

024764.11.fid

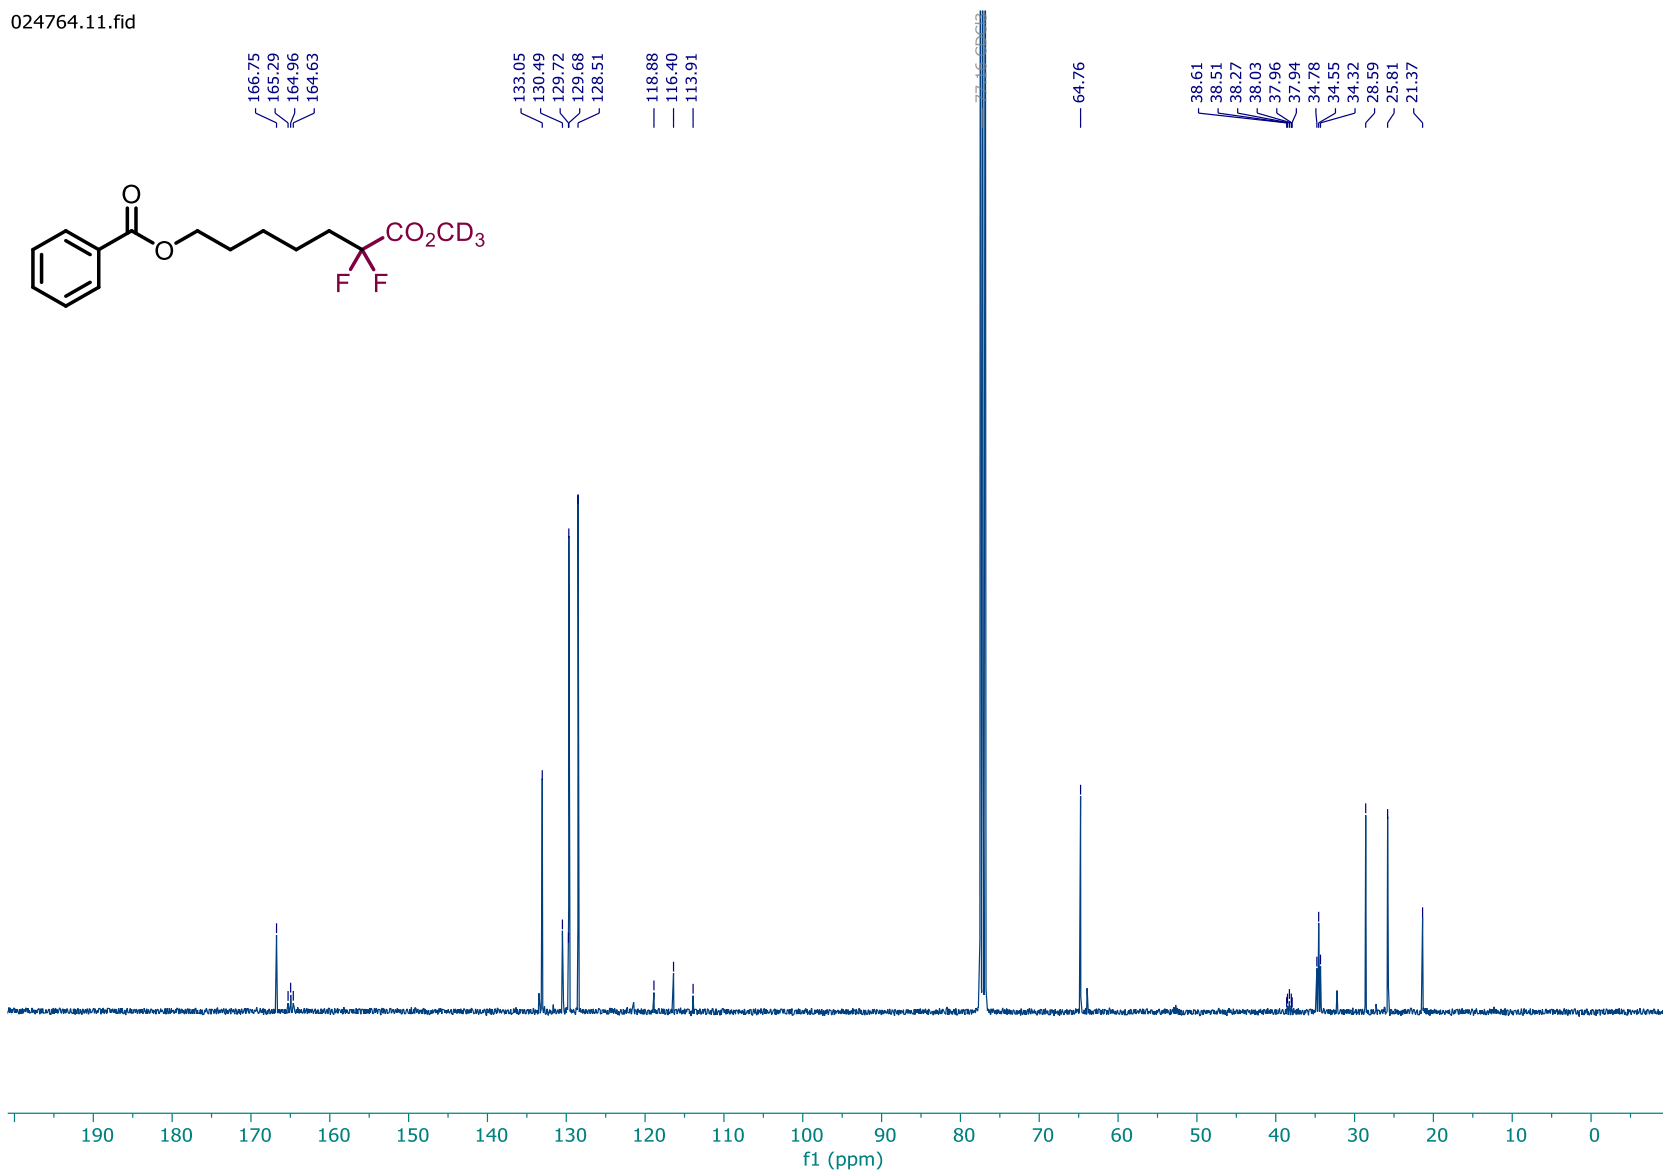

GC\_085195.3.fid  
rg-sn-619-tt5,6

$^{19}\text{F}$  NMR (282 MHz,  $\text{CDCl}_3$ ) of **32**

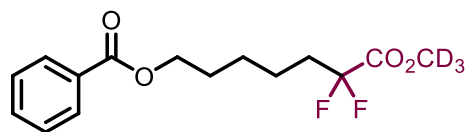

-105.68  
-105.74  
-105.80

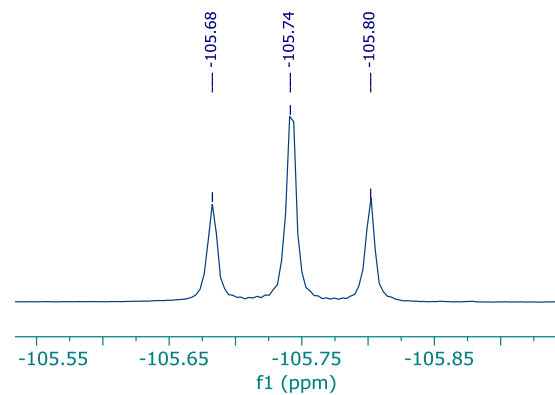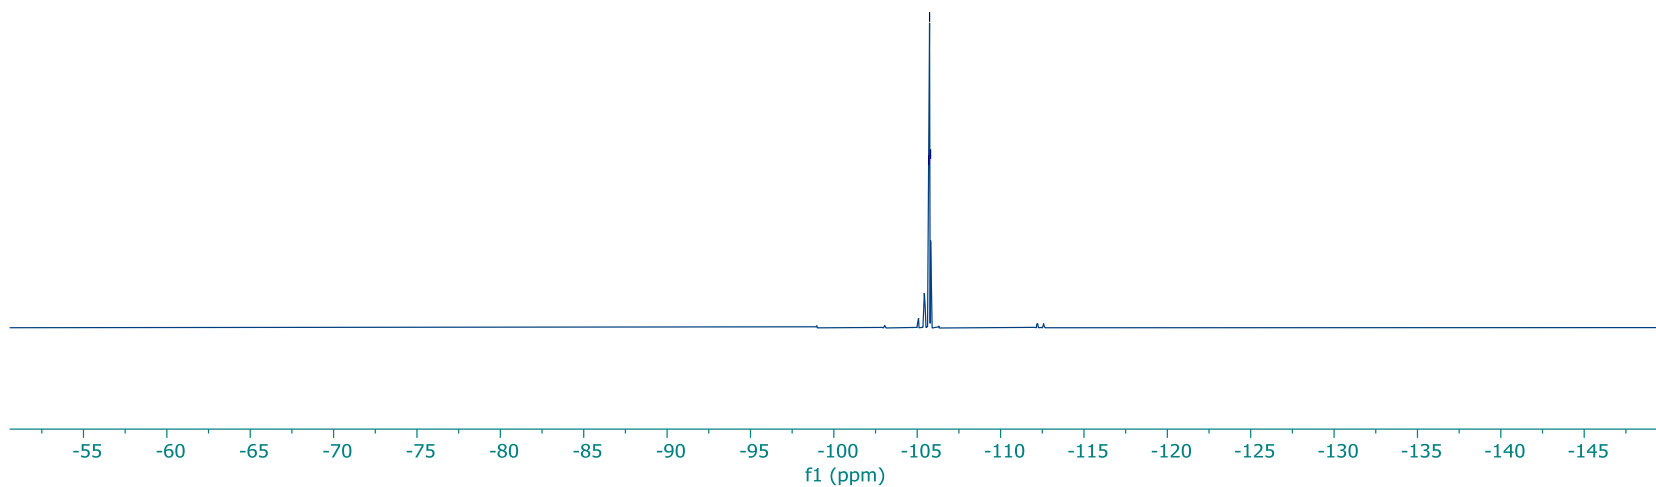

$^1\text{H}$  NMR (300 MHz,  $\text{CDCl}_3$ ) of **33**

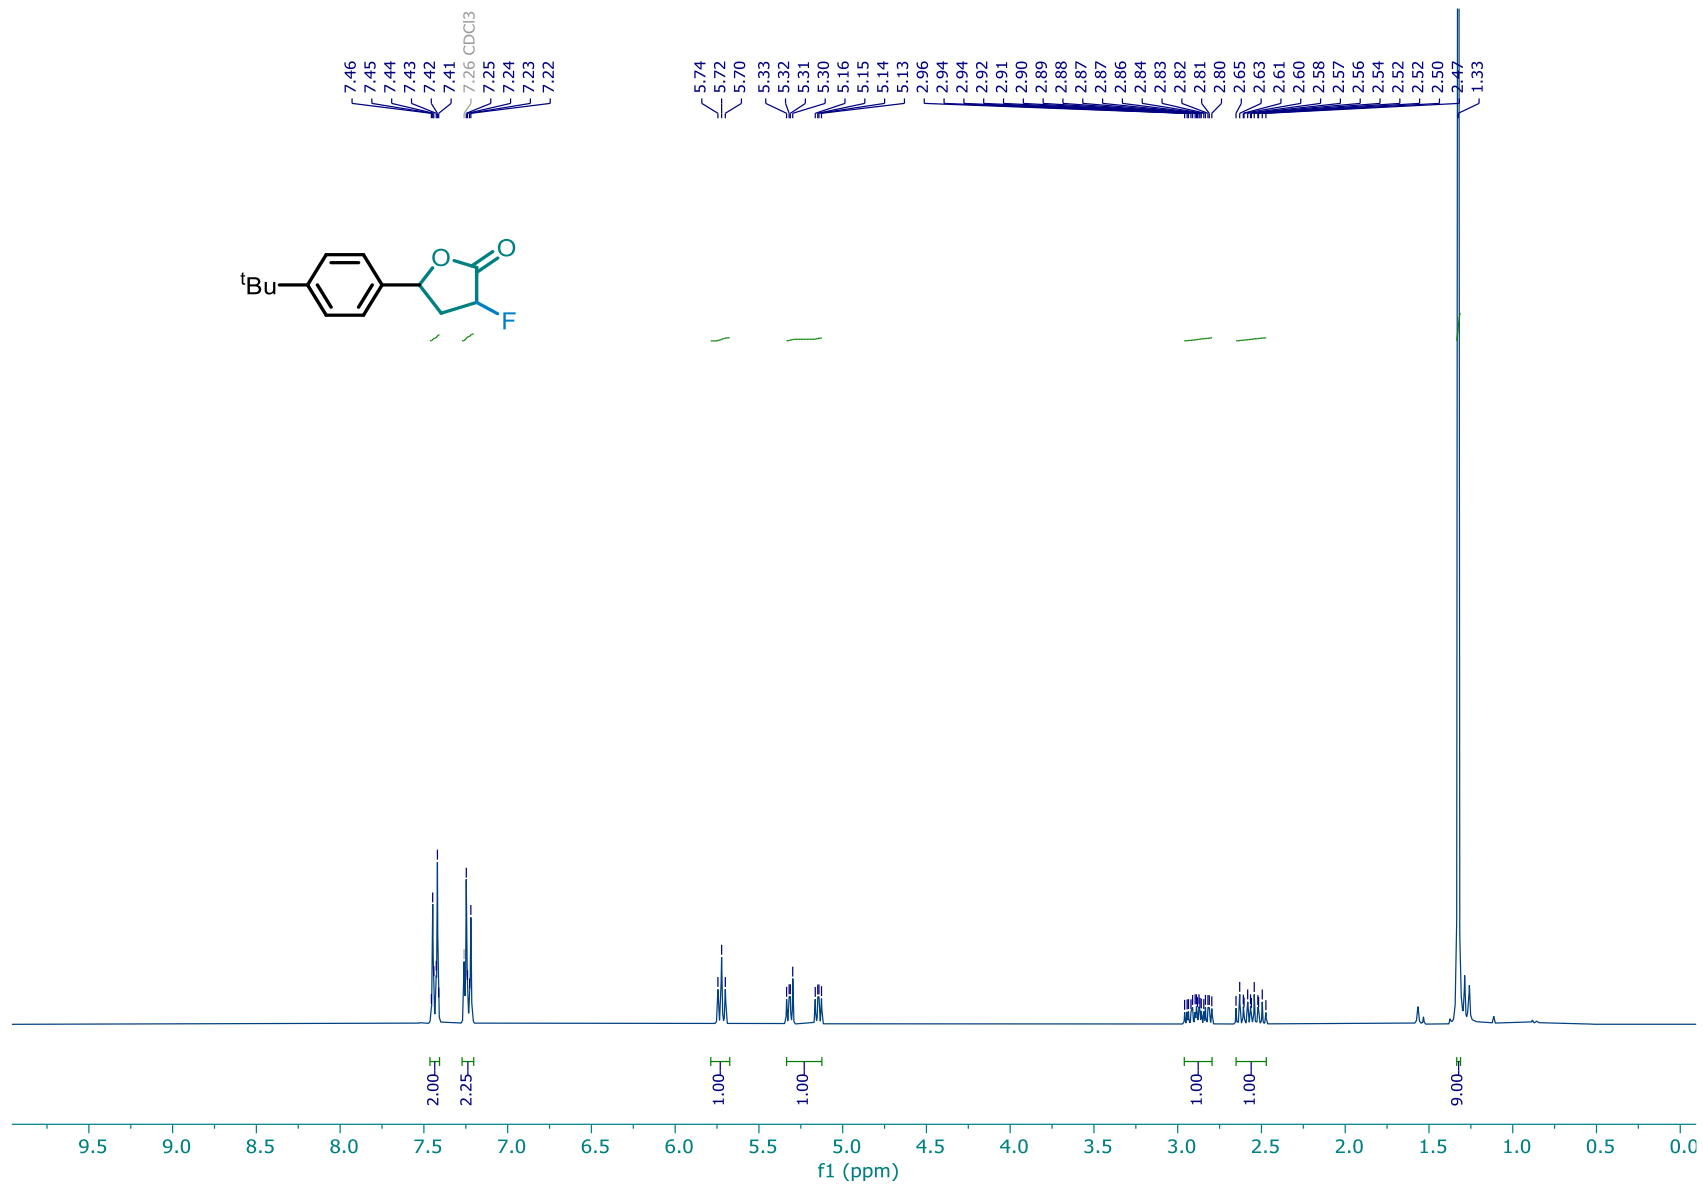

<sup>13</sup>C NMR (75 MHz, CDCl<sub>3</sub>) of **33**

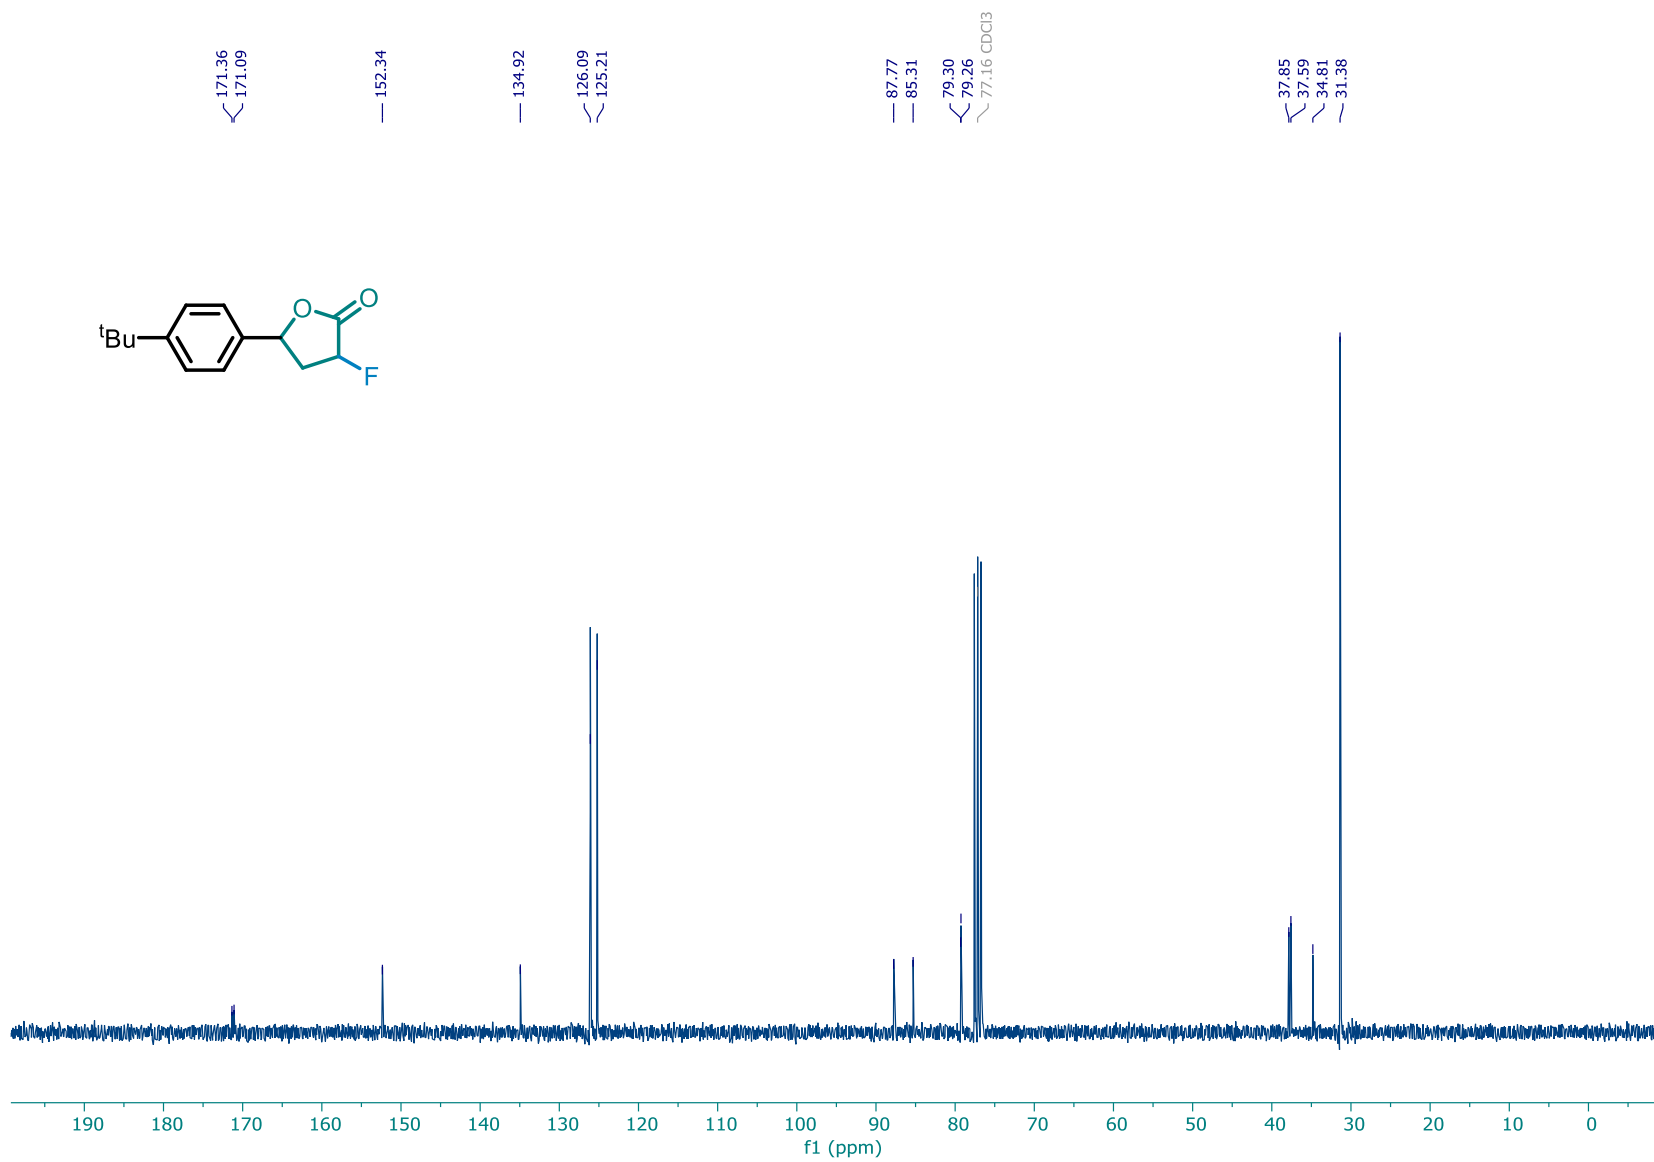

$^{19}\text{F}$  NMR (282 MHz,  $\text{CDCl}_3$ ) of **33**

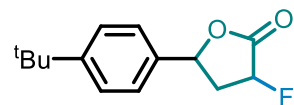

— -194.08

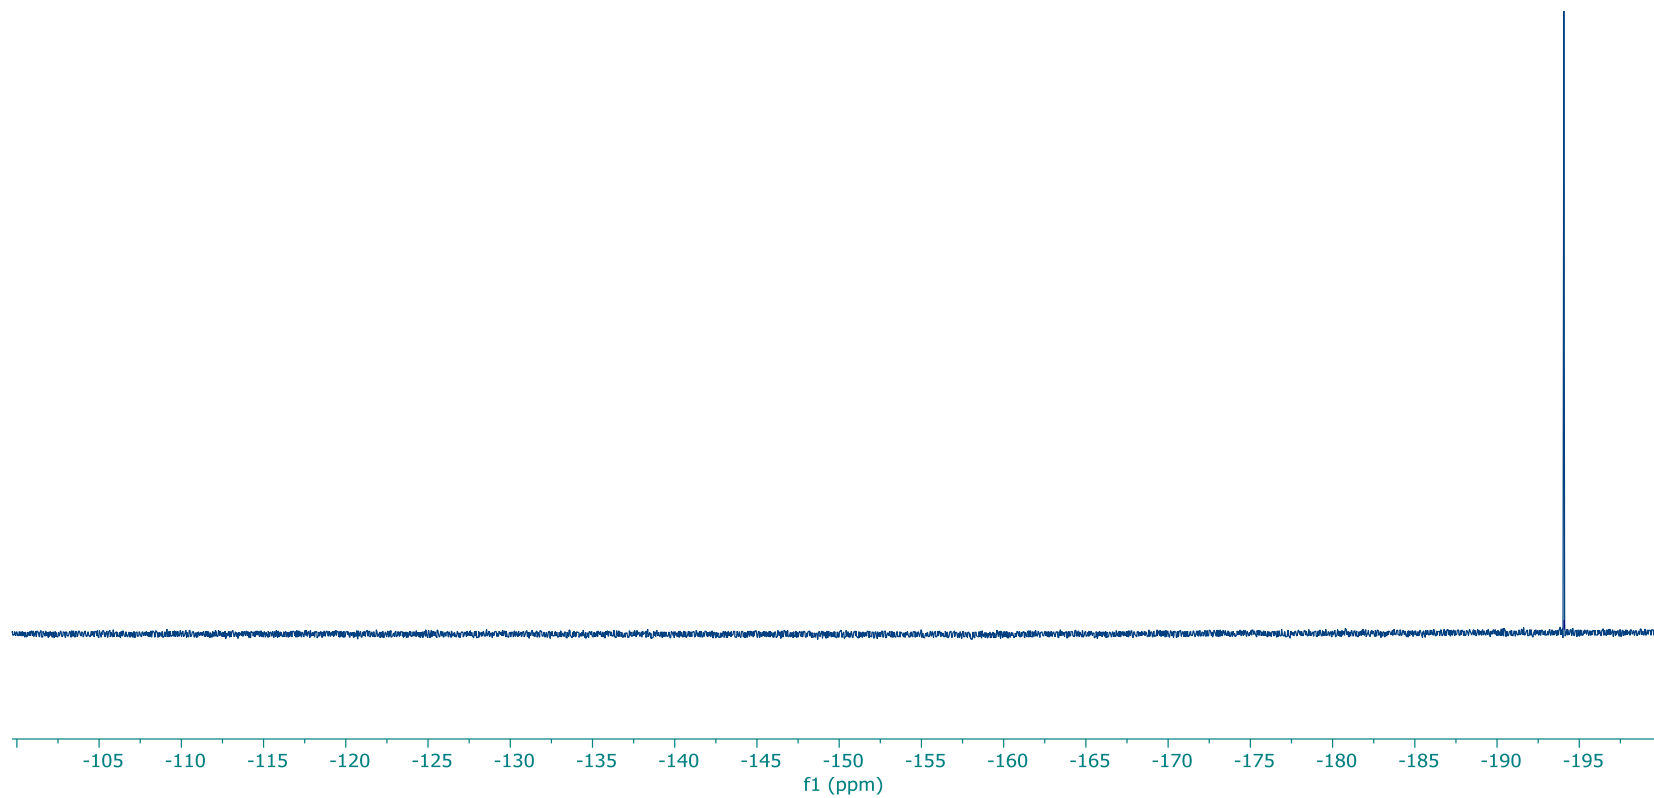

$^1\text{H}$  NMR (300 MHz,  $\text{CDCl}_3$ ) of **1**

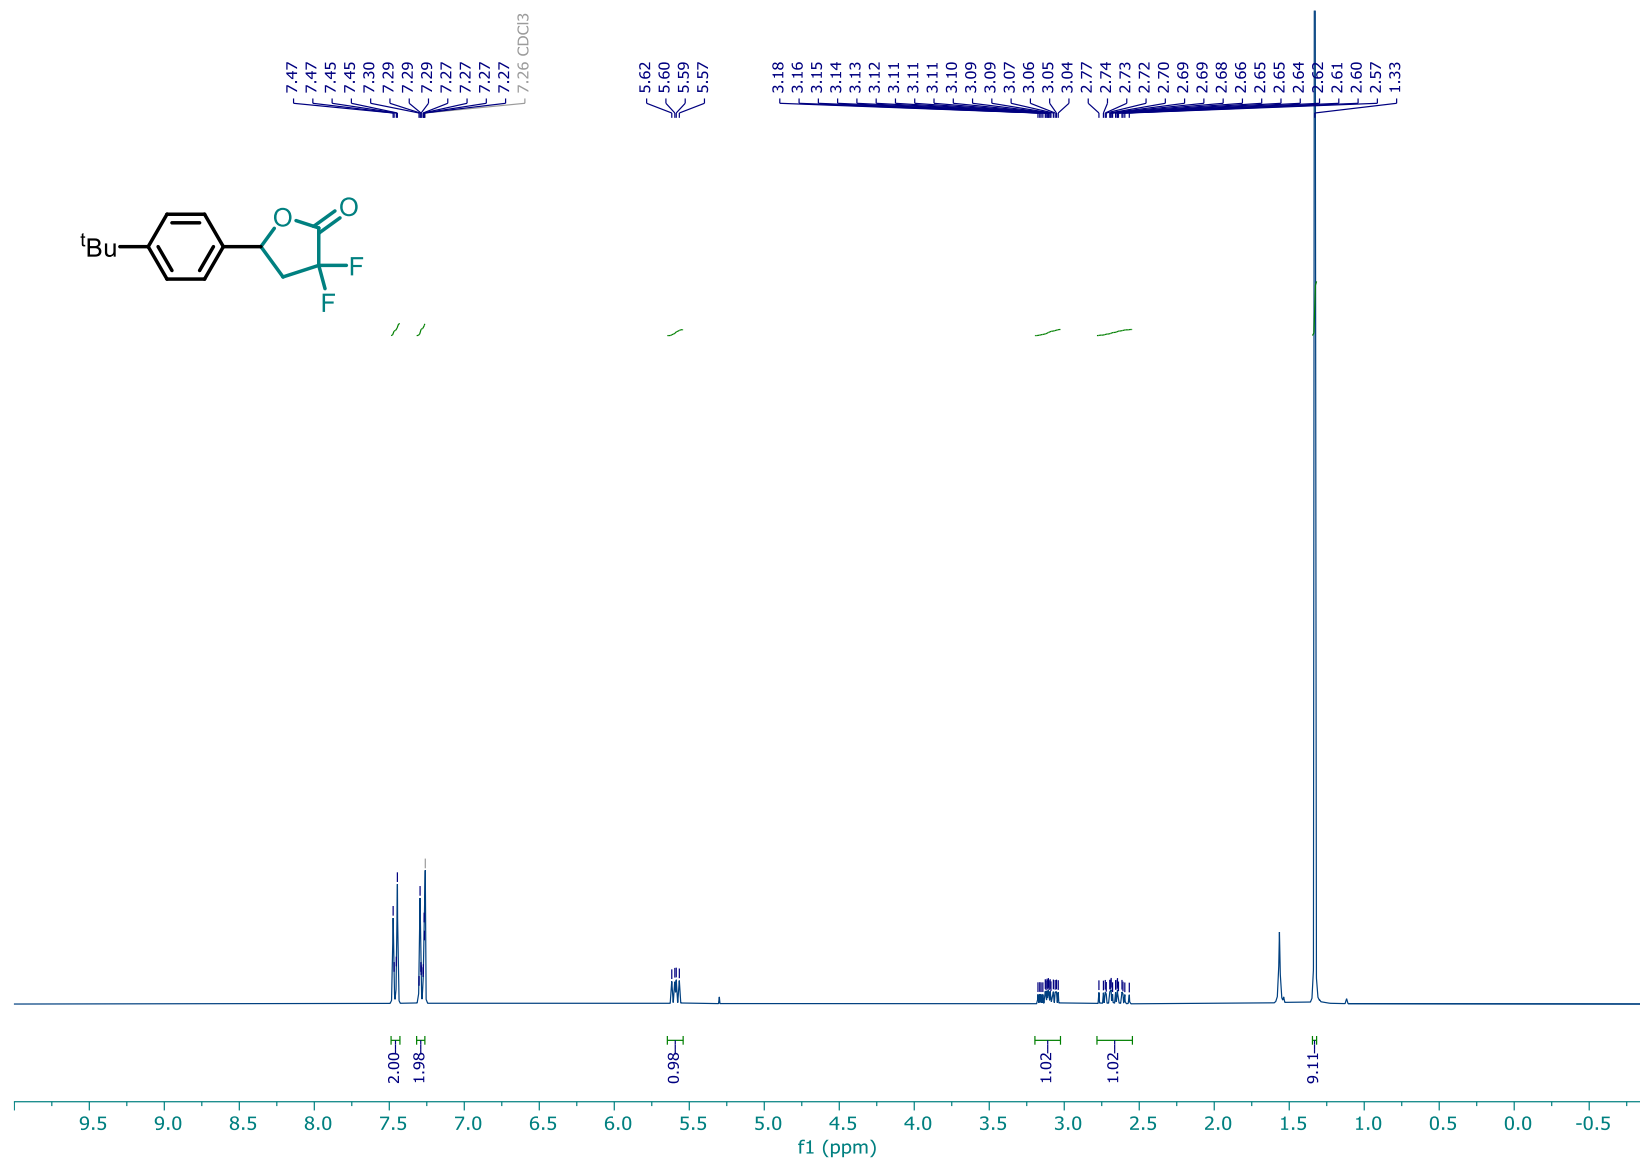



$^{13}\text{C}$  NMR (126 MHz,  $\text{CDCl}_3$ ) of **1**

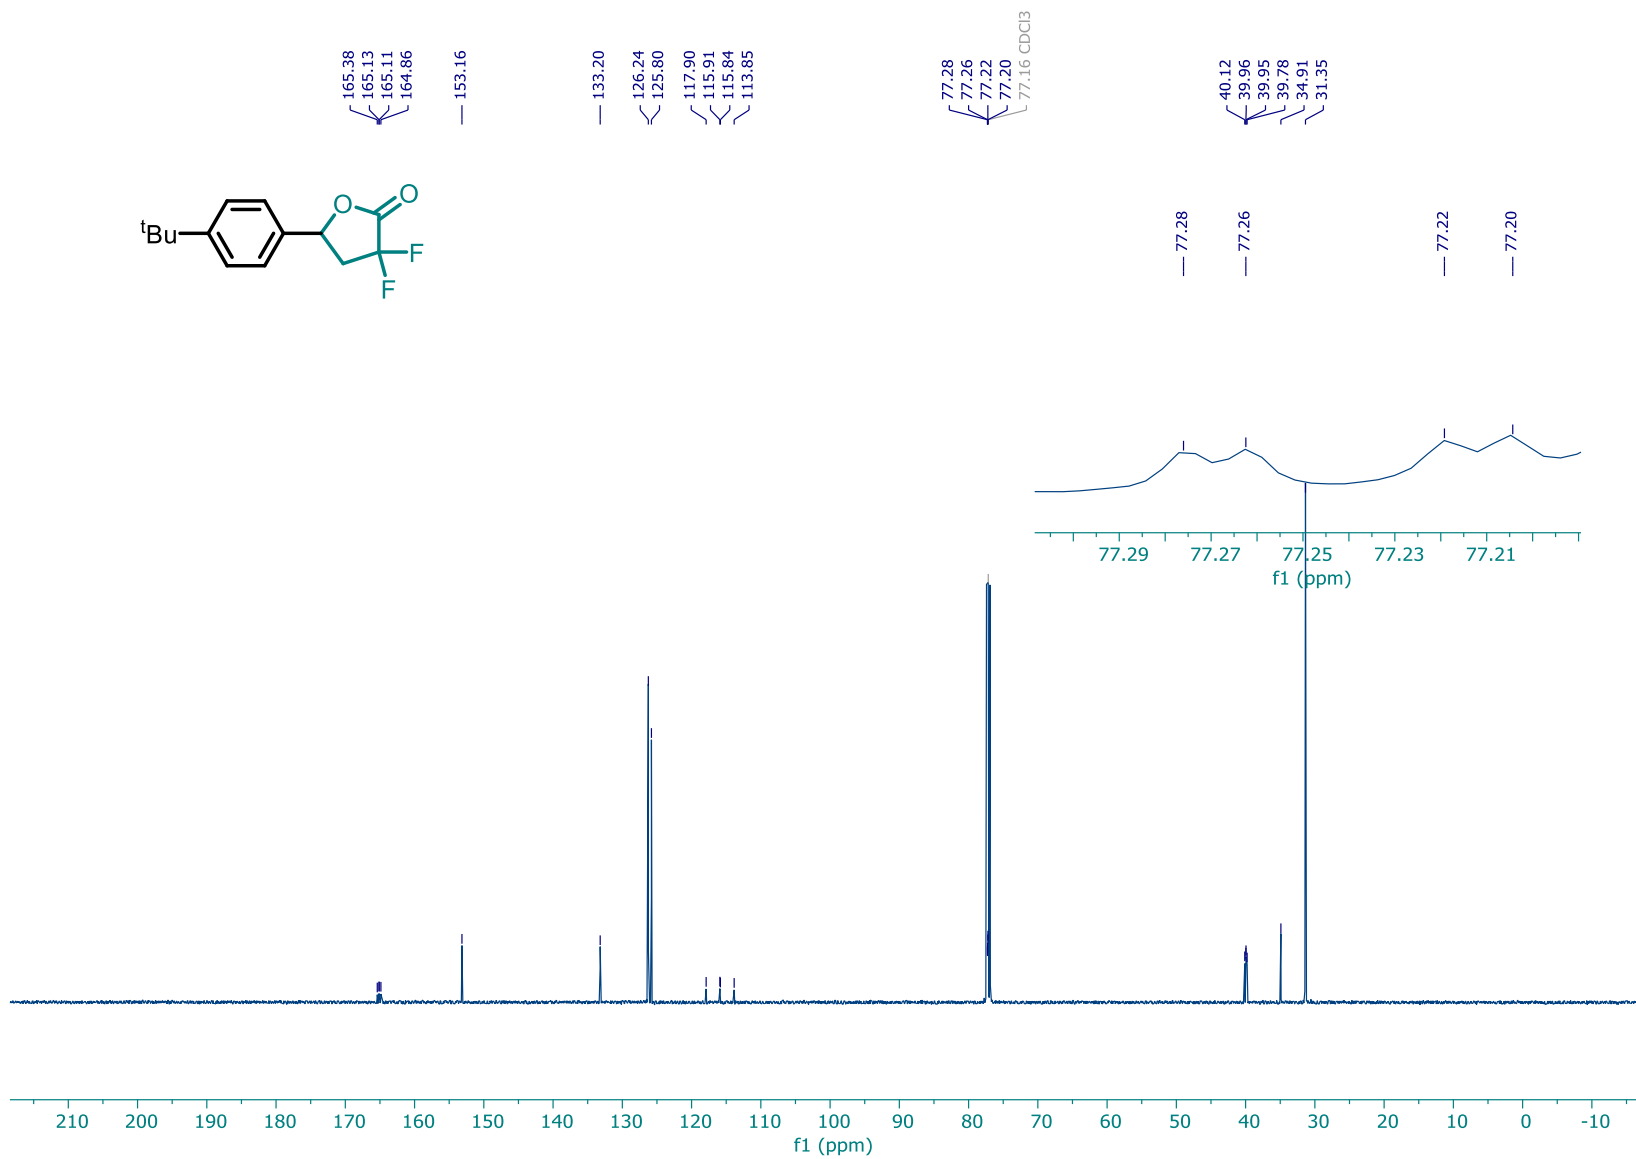

$^{19}\text{F}$  NMR (282 MHz,  $\text{CDCl}_3$ ) of **1**

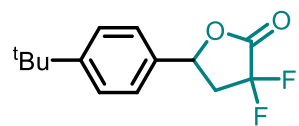

-105.97  
-106.96  
-108.77  
-109.74

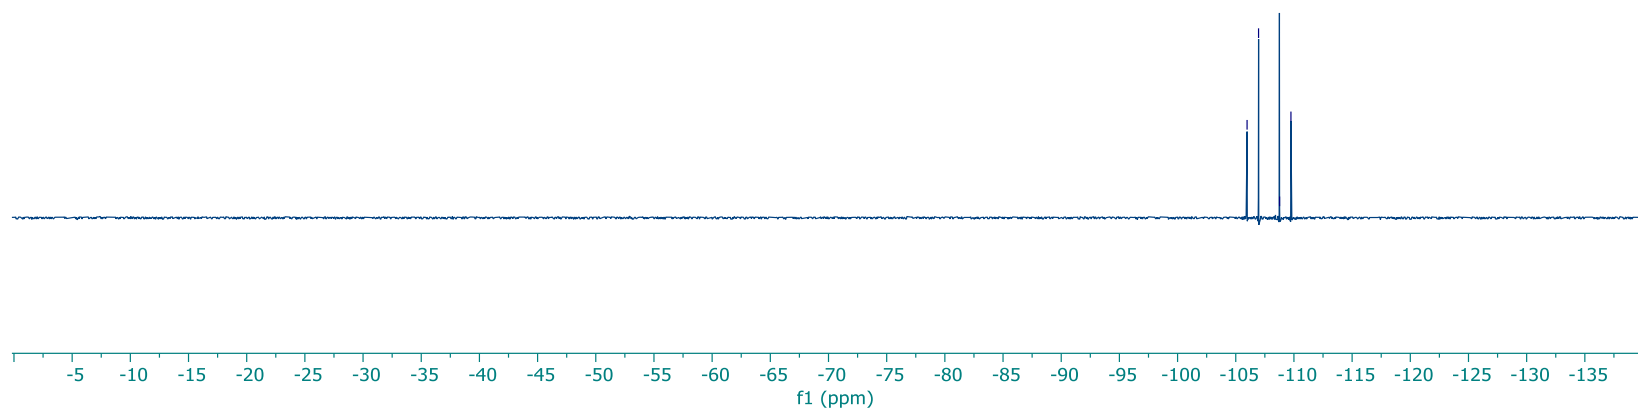

<sup>1</sup>H NMR (500 MHz, CDCl<sub>3</sub>) of **34**

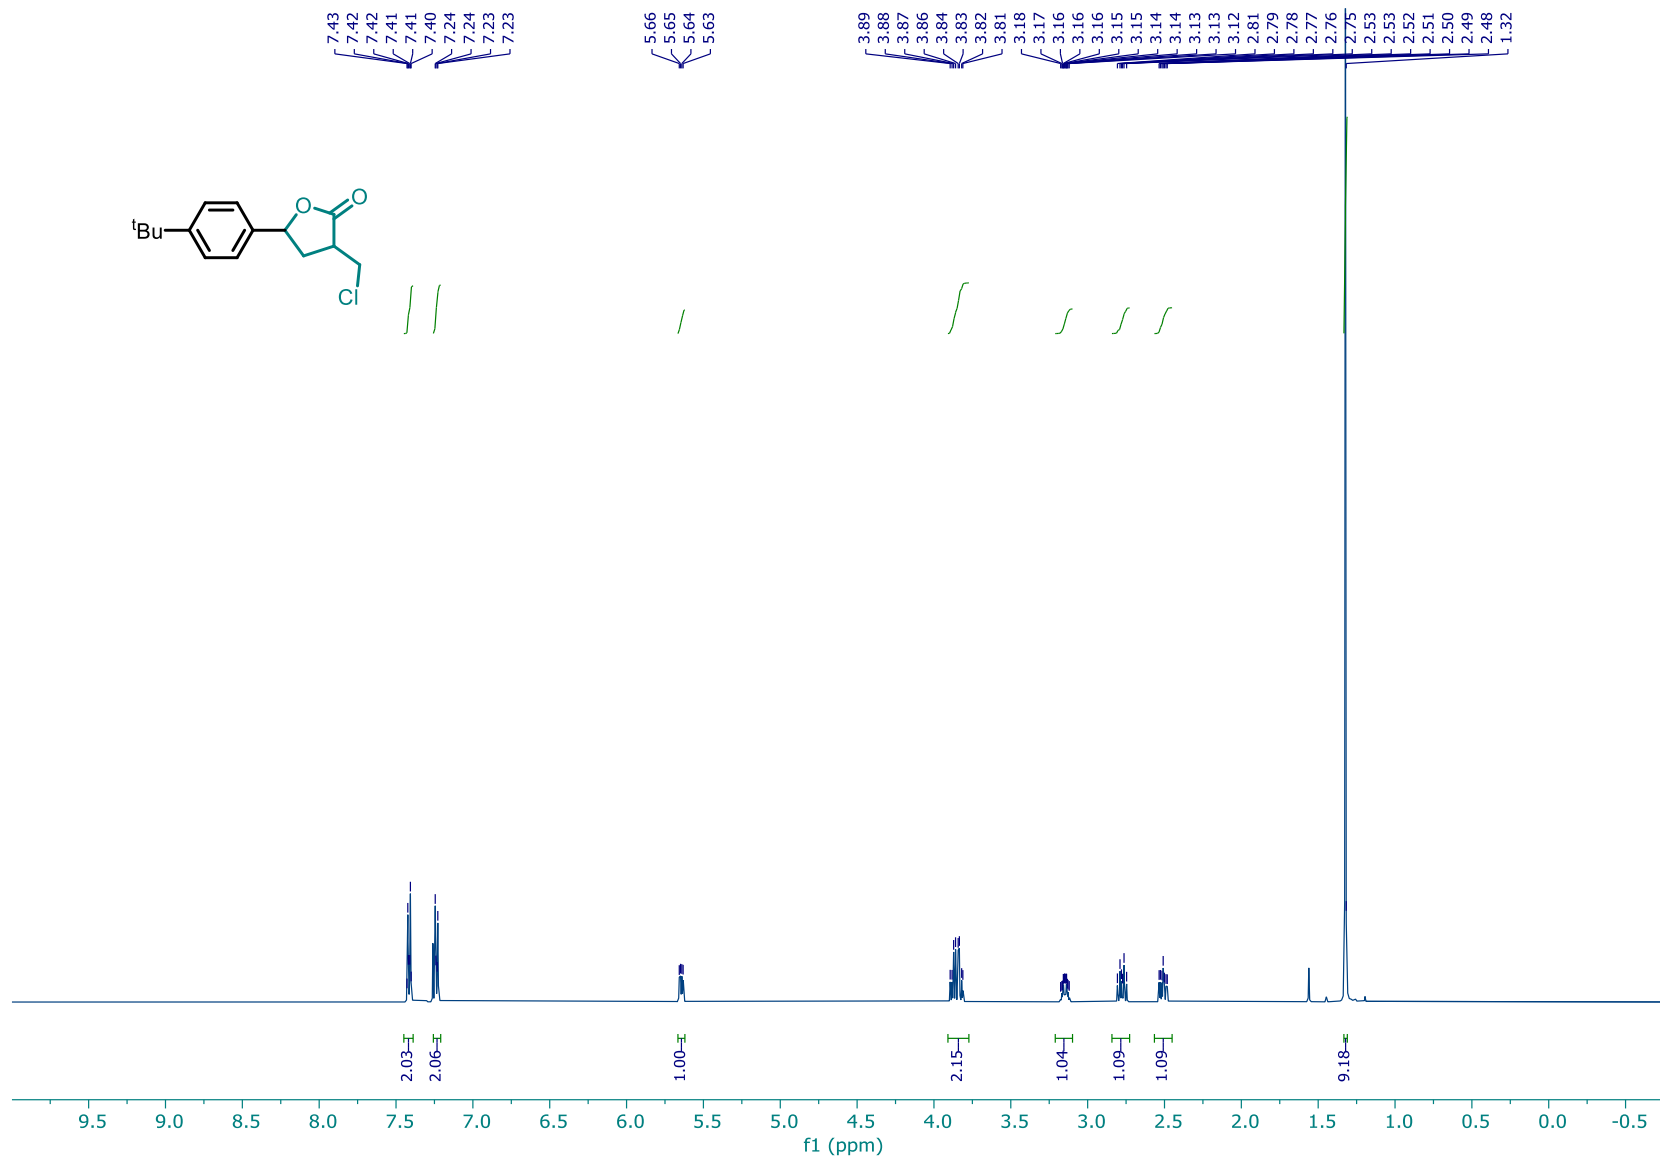

<sup>13</sup>C NMR (126 MHz, CDCl<sub>3</sub>) of **34**

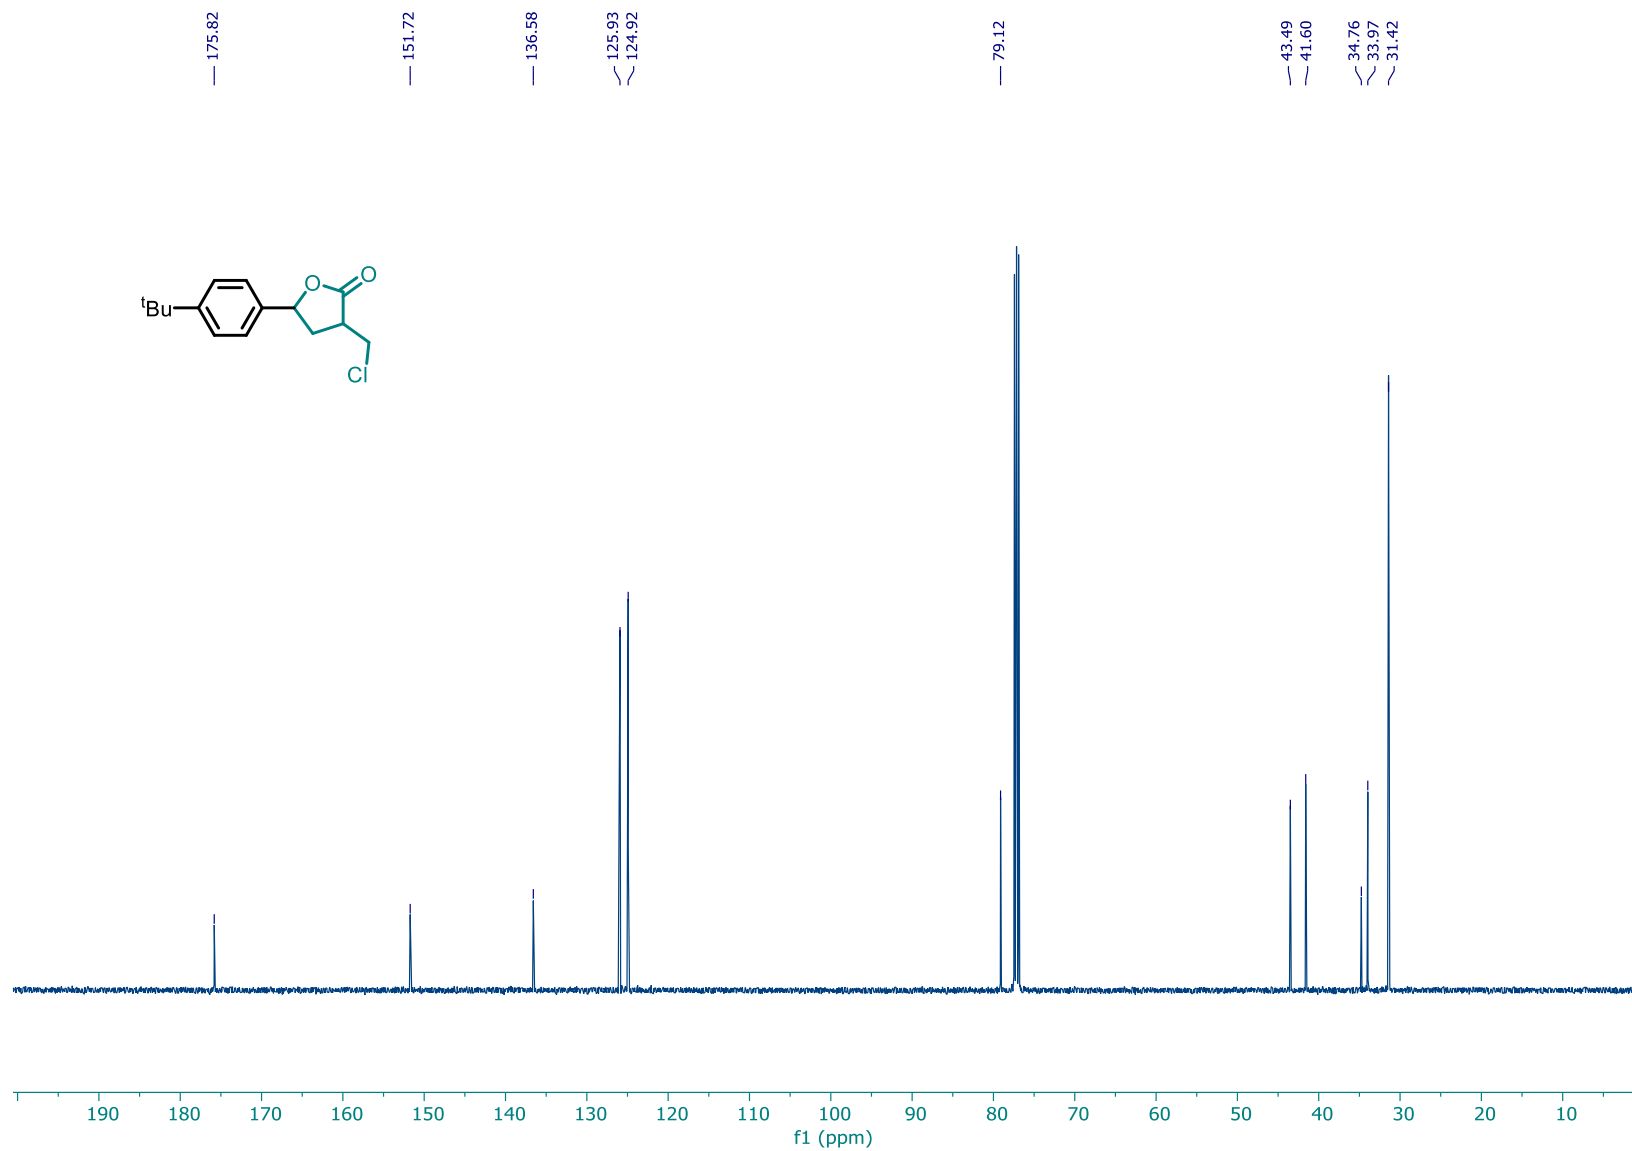

$^1\text{H}$  NMR (500 MHz,  $\text{CDCl}_3$ ) of **35**

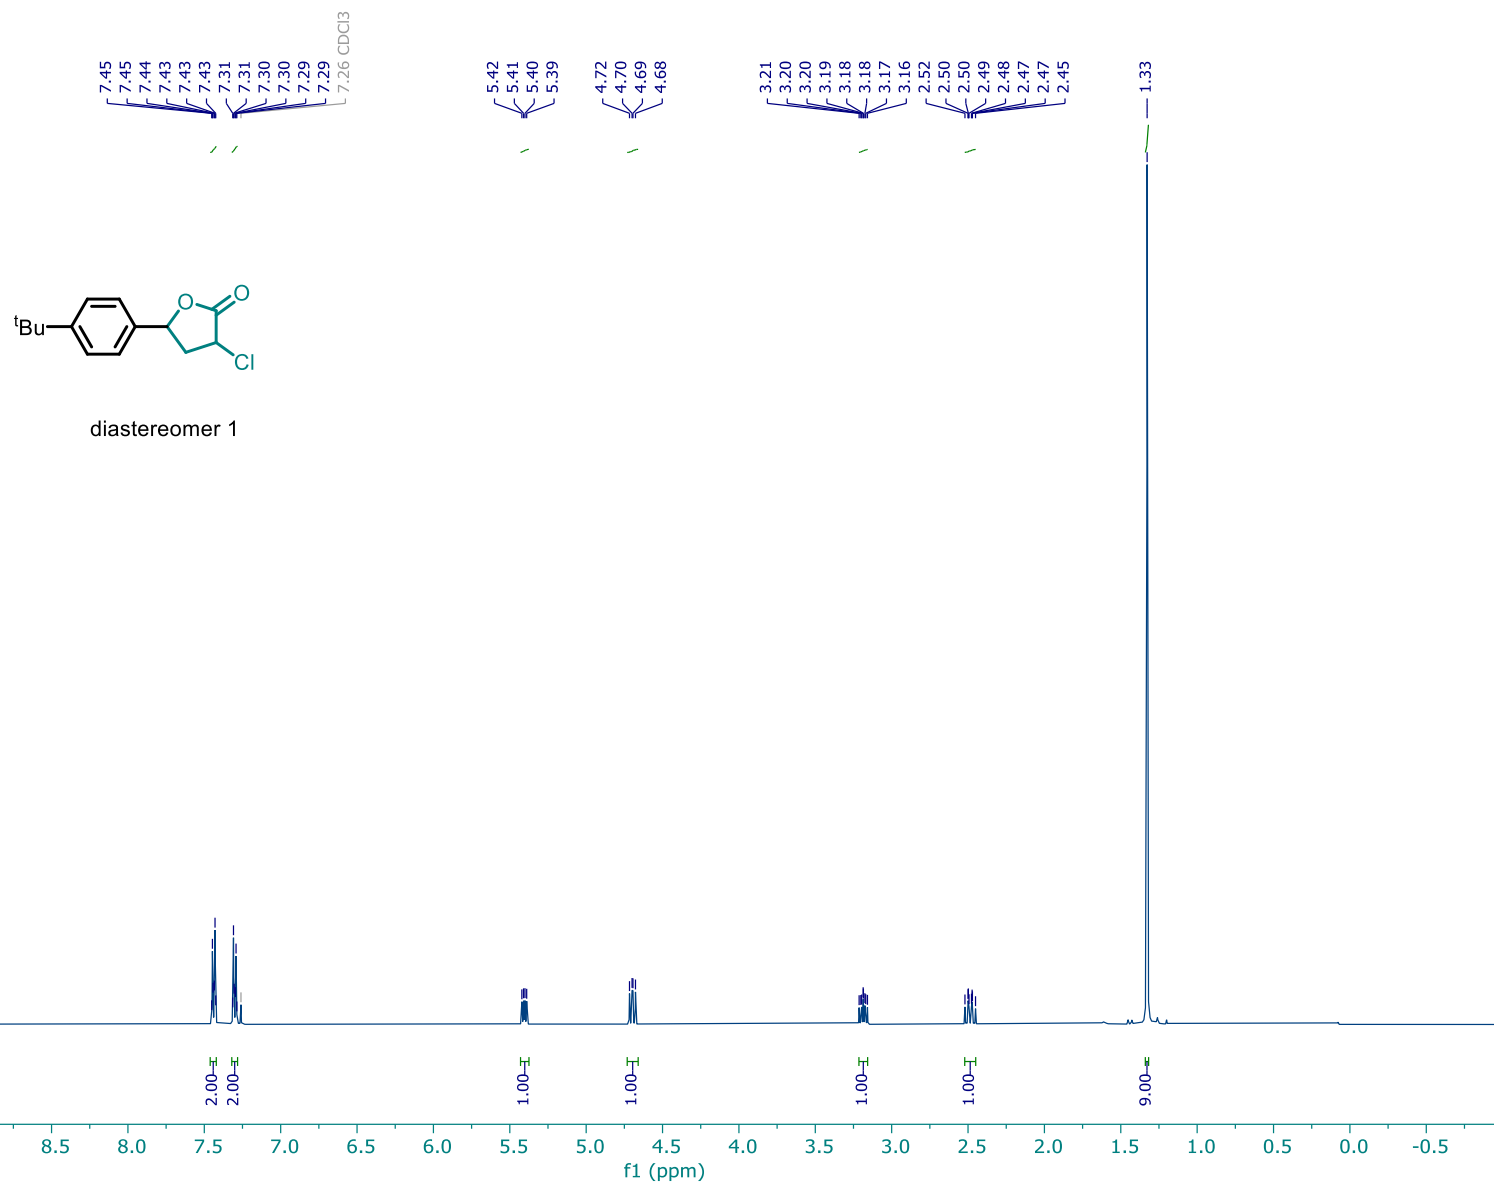

$^{13}\text{C}$  NMR (126 MHz,  $\text{CDCl}_3$ ) of **35**

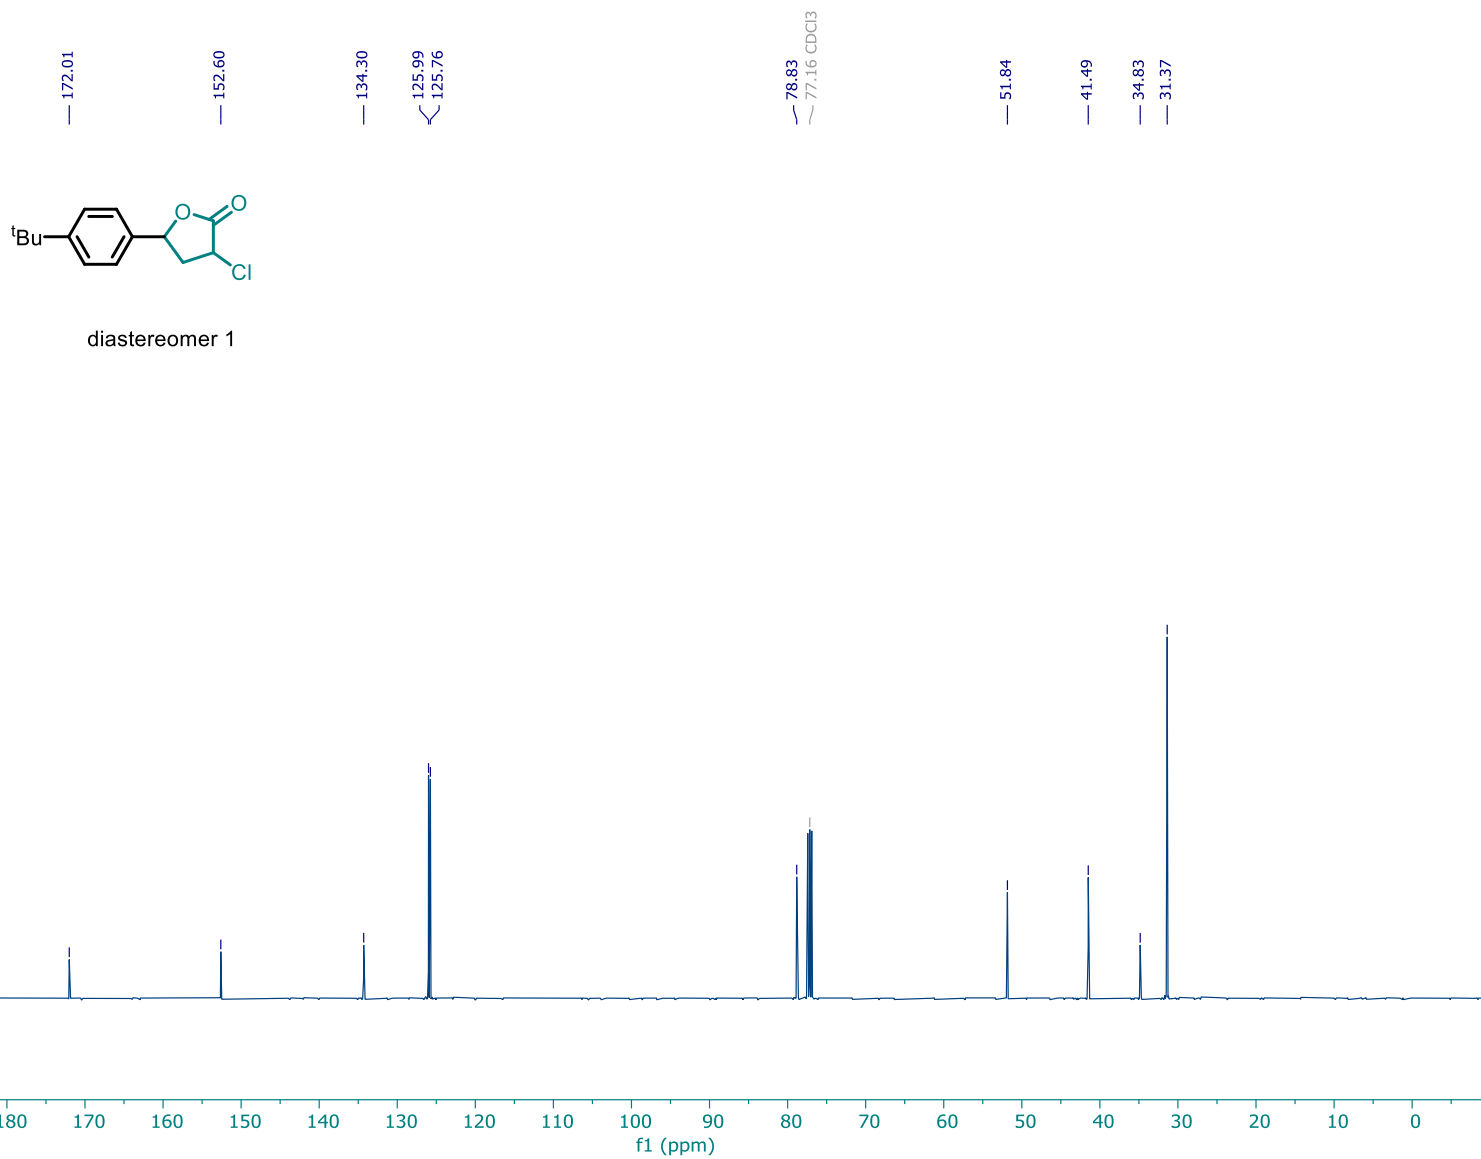

<sup>1</sup>H NMR (500 MHz, CDCl<sub>3</sub>) of **35**

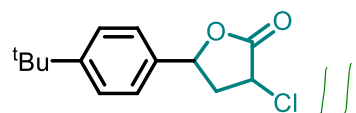

diastereomer 2

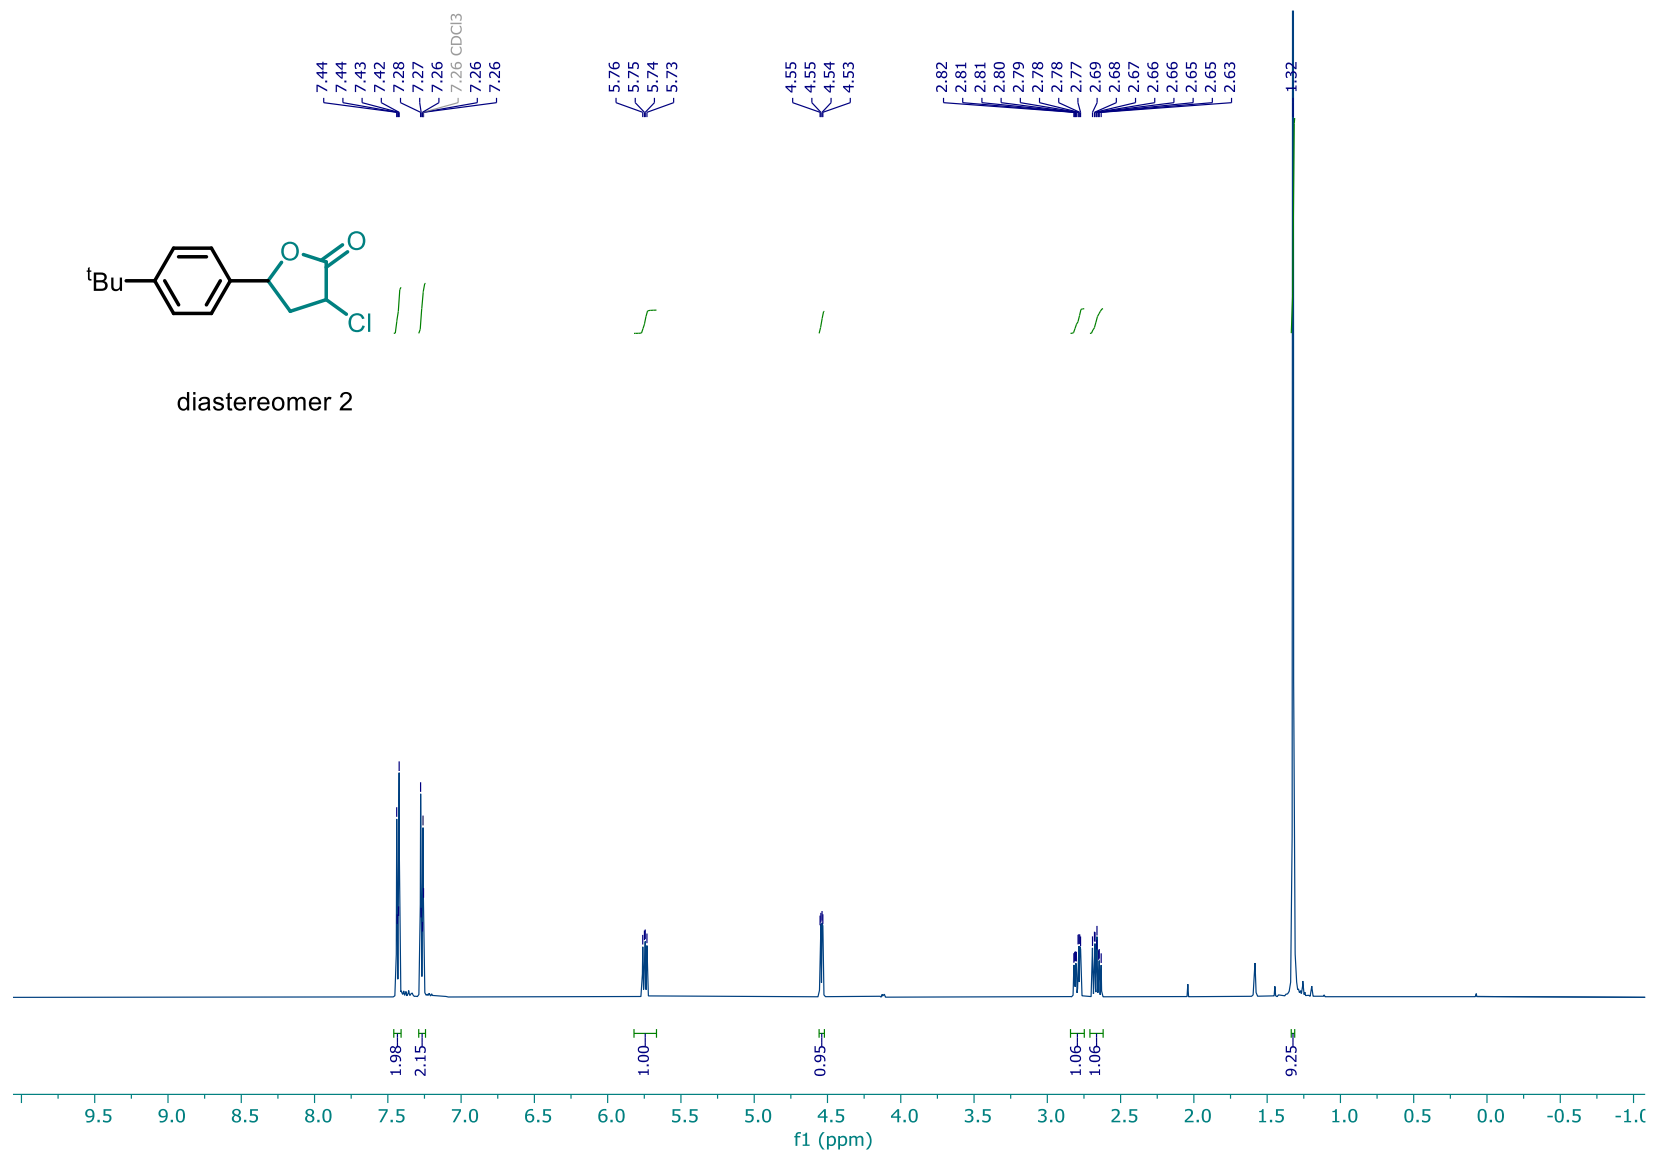

$^{13}\text{C}$  NMR (126 MHz,  $\text{CDCl}_3$ ) of **35**

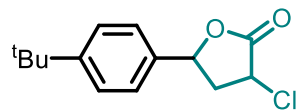

diastereomer 2

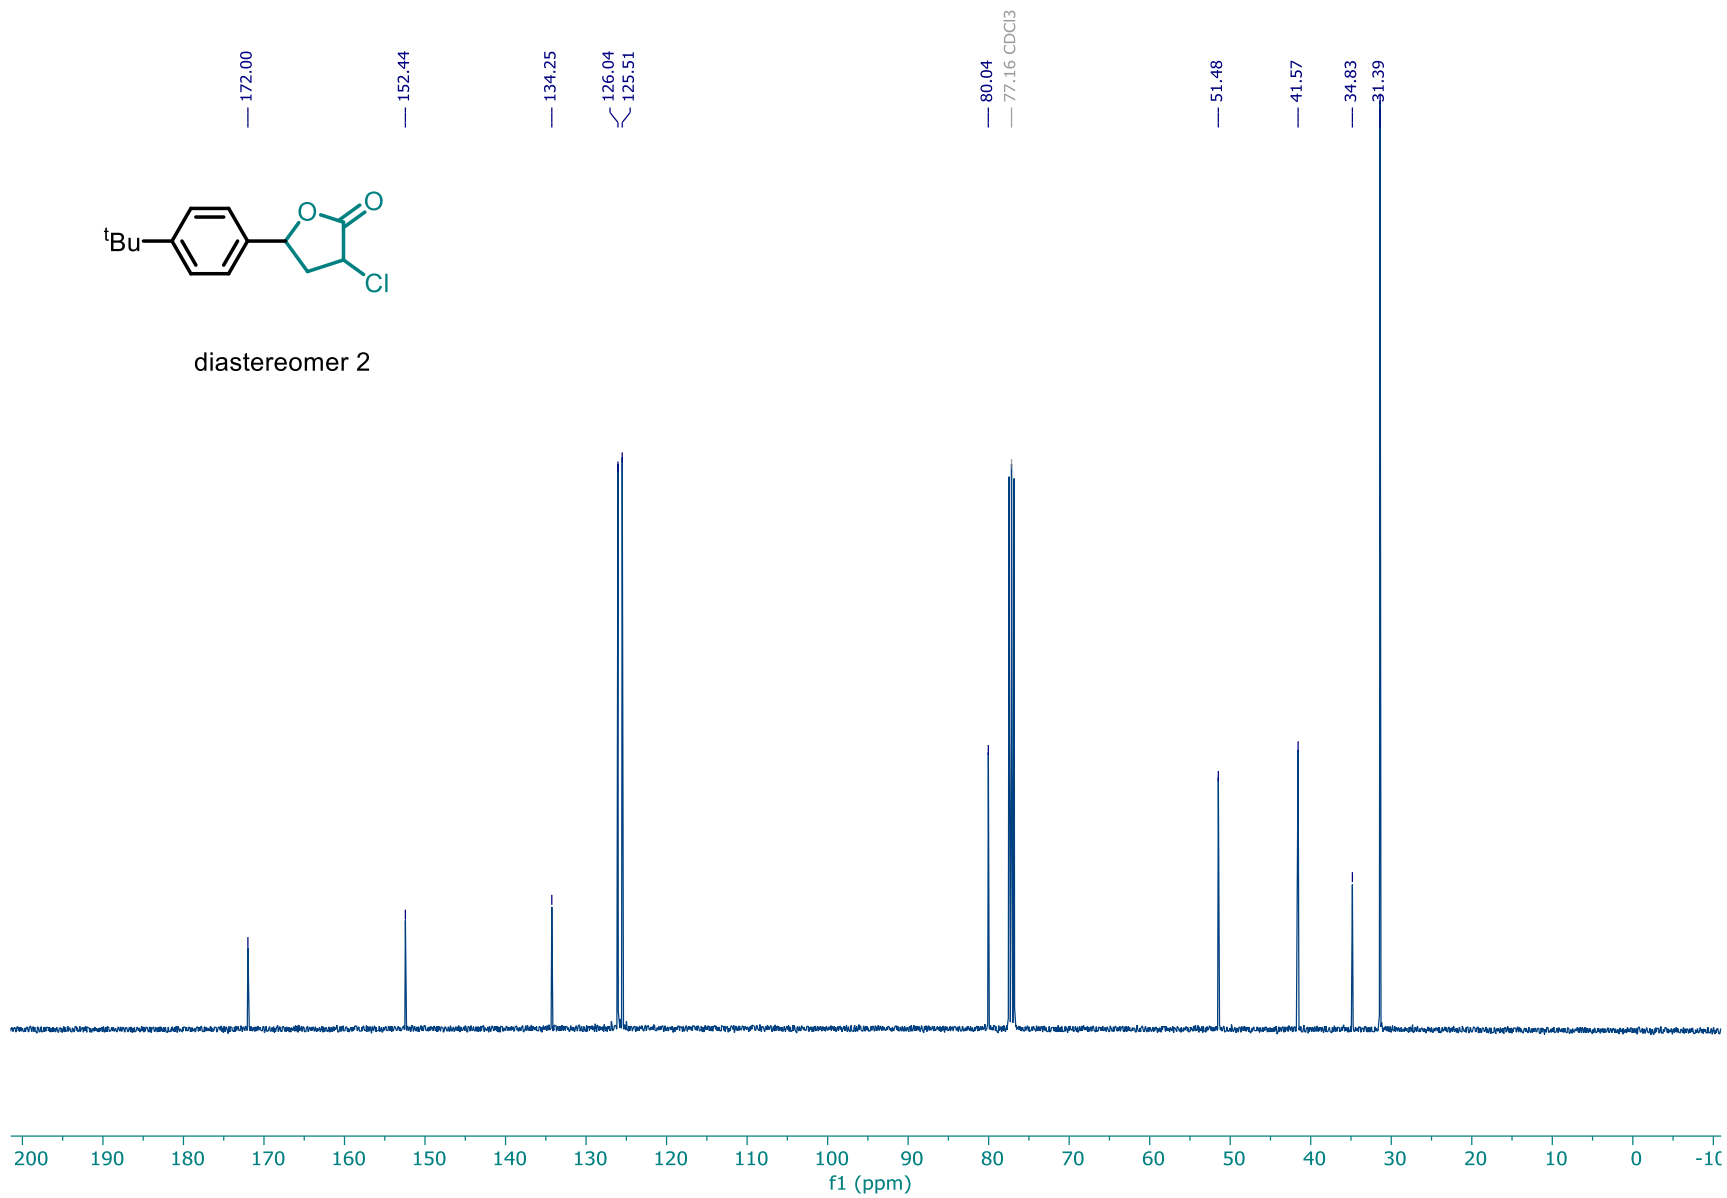



$^1\text{H}$  NMR (300 MHz,  $\text{CDCl}_3$ ) of **36**

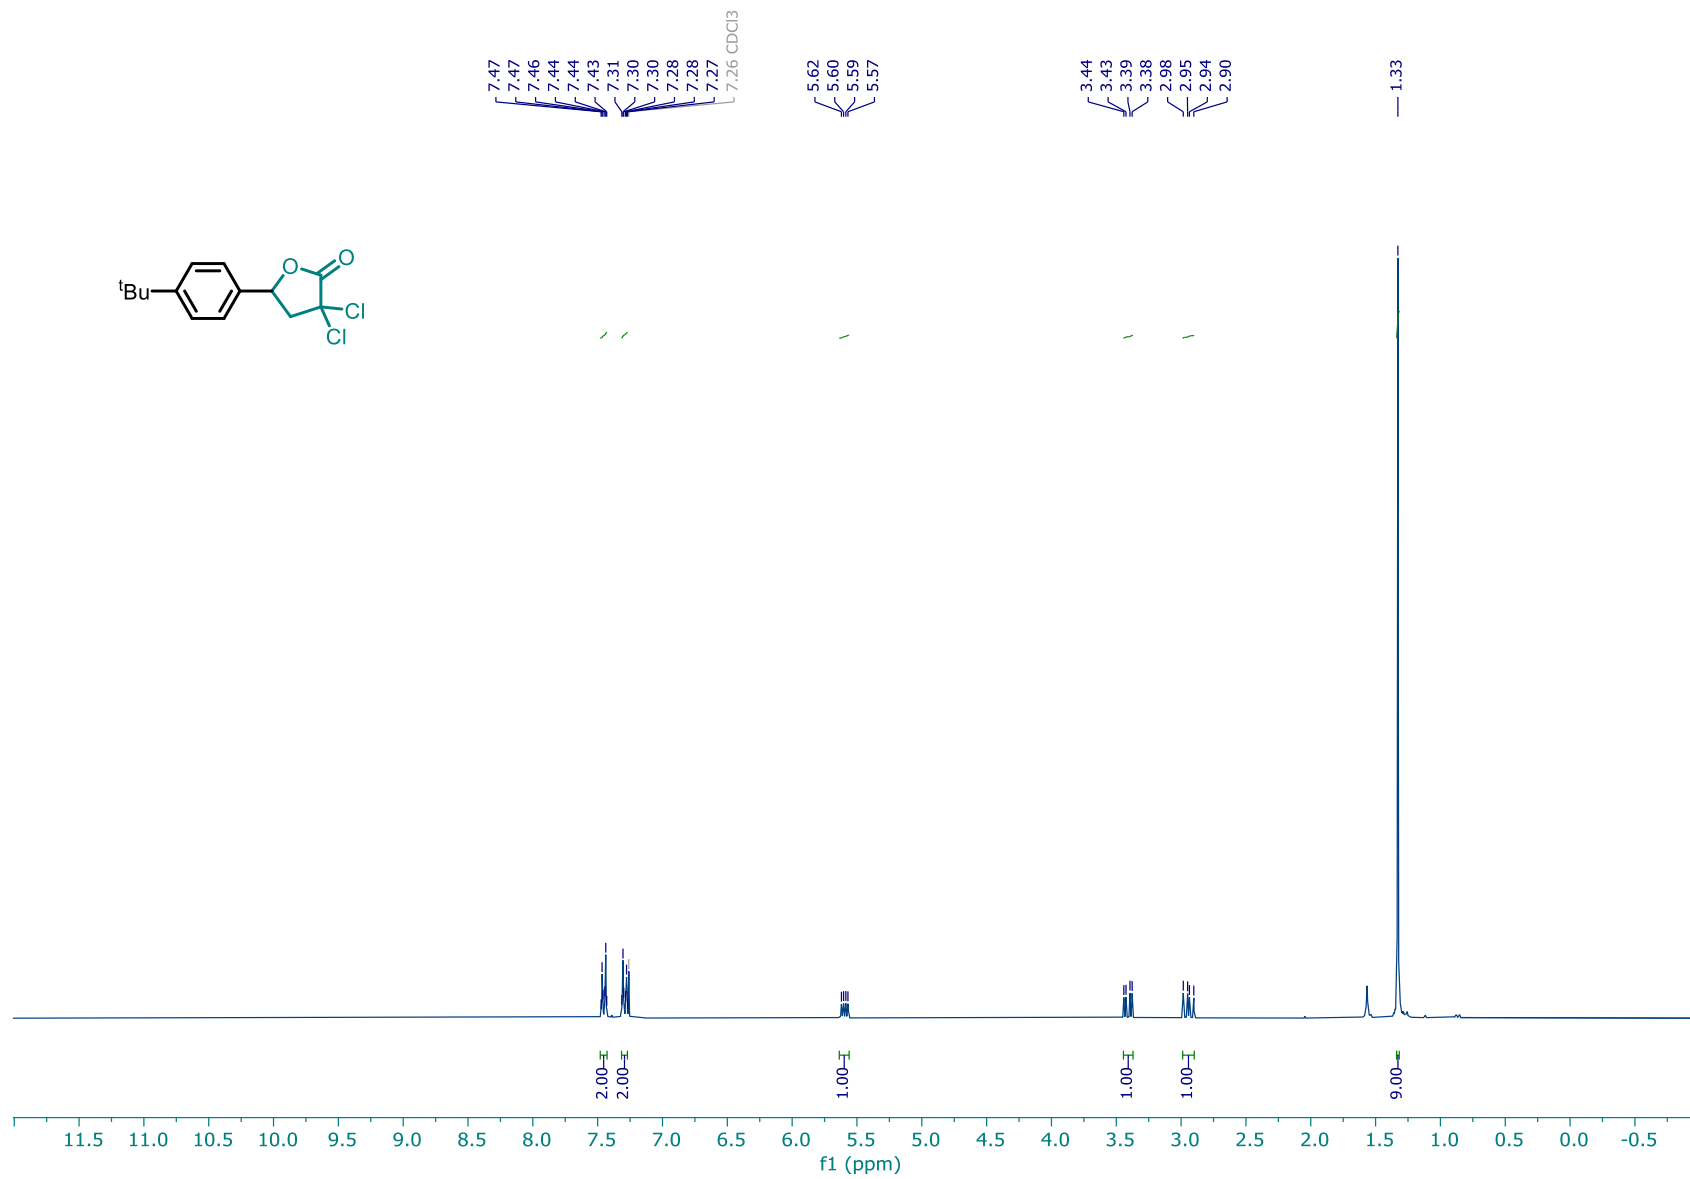

<sup>13</sup>C NMR (75 MHz, CDCl<sub>3</sub>) of **36**

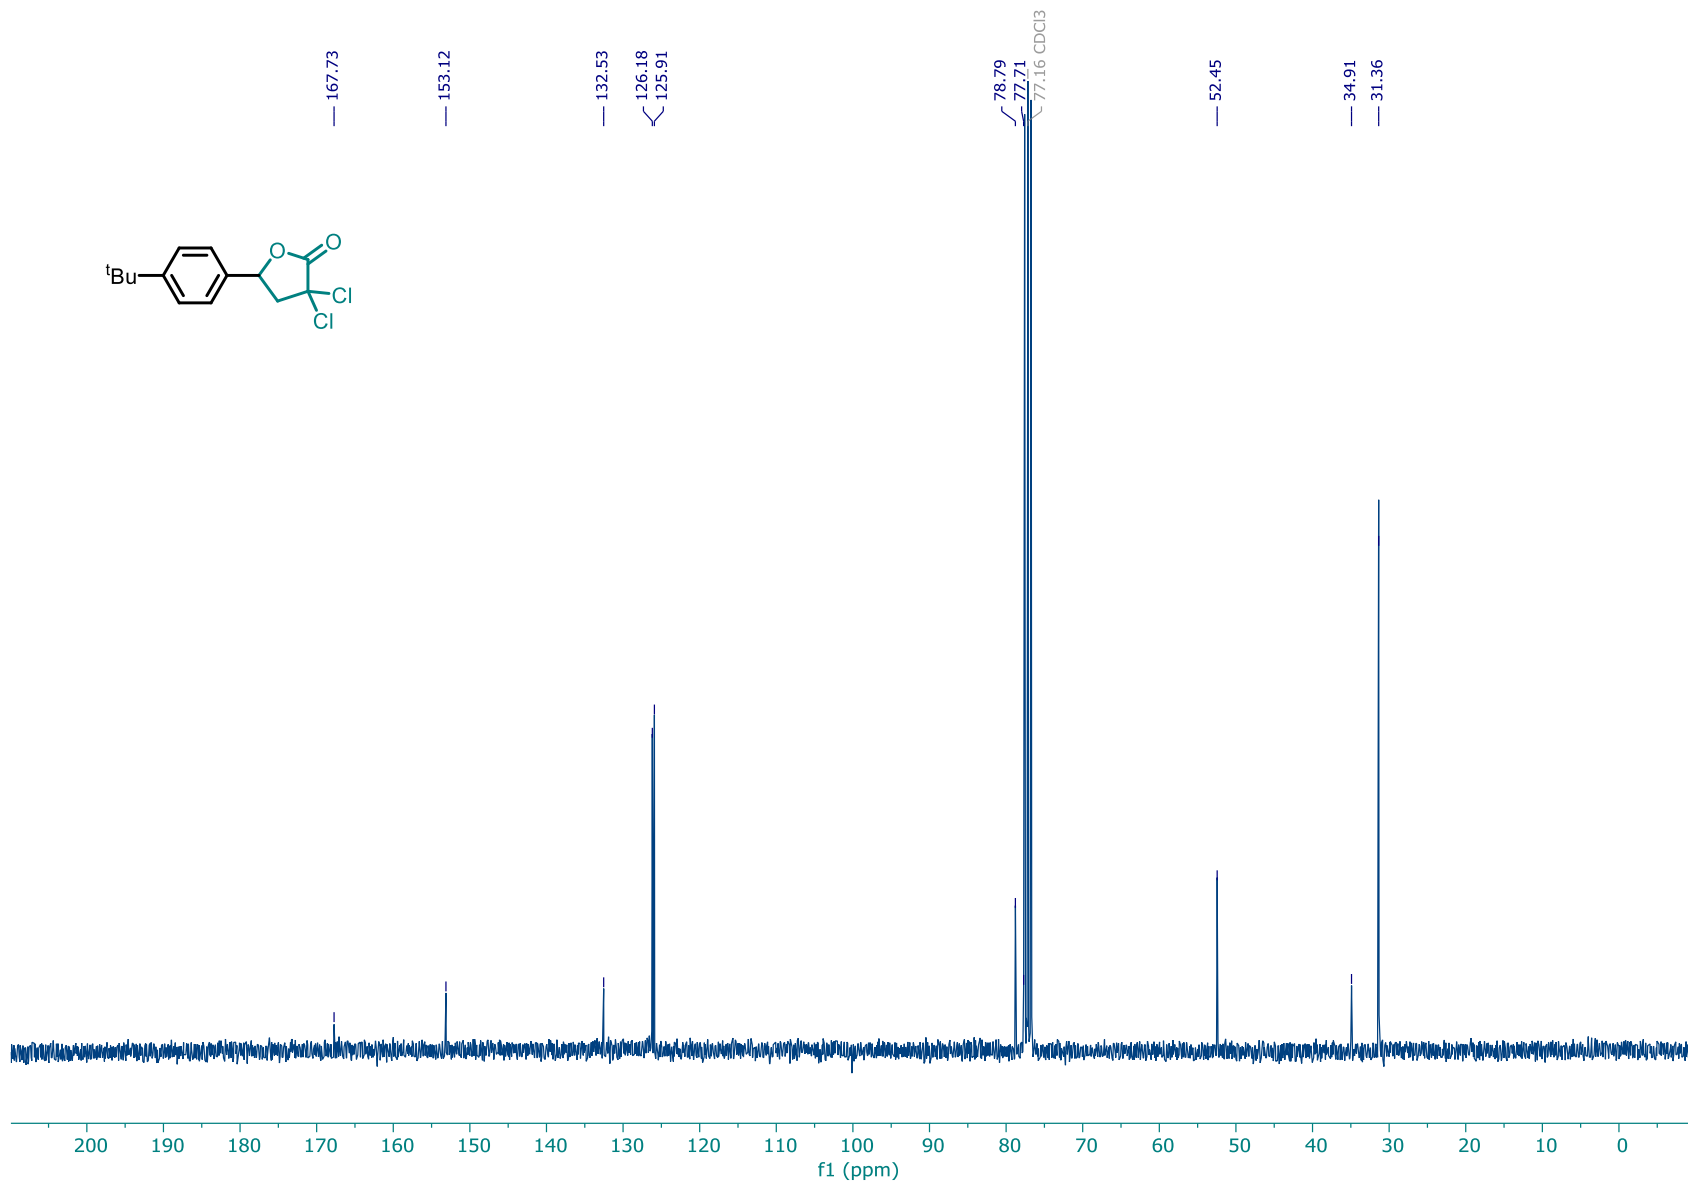

<sup>1</sup>H NMR (300 MHz, CDCl<sub>3</sub>) of **37**

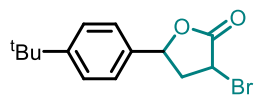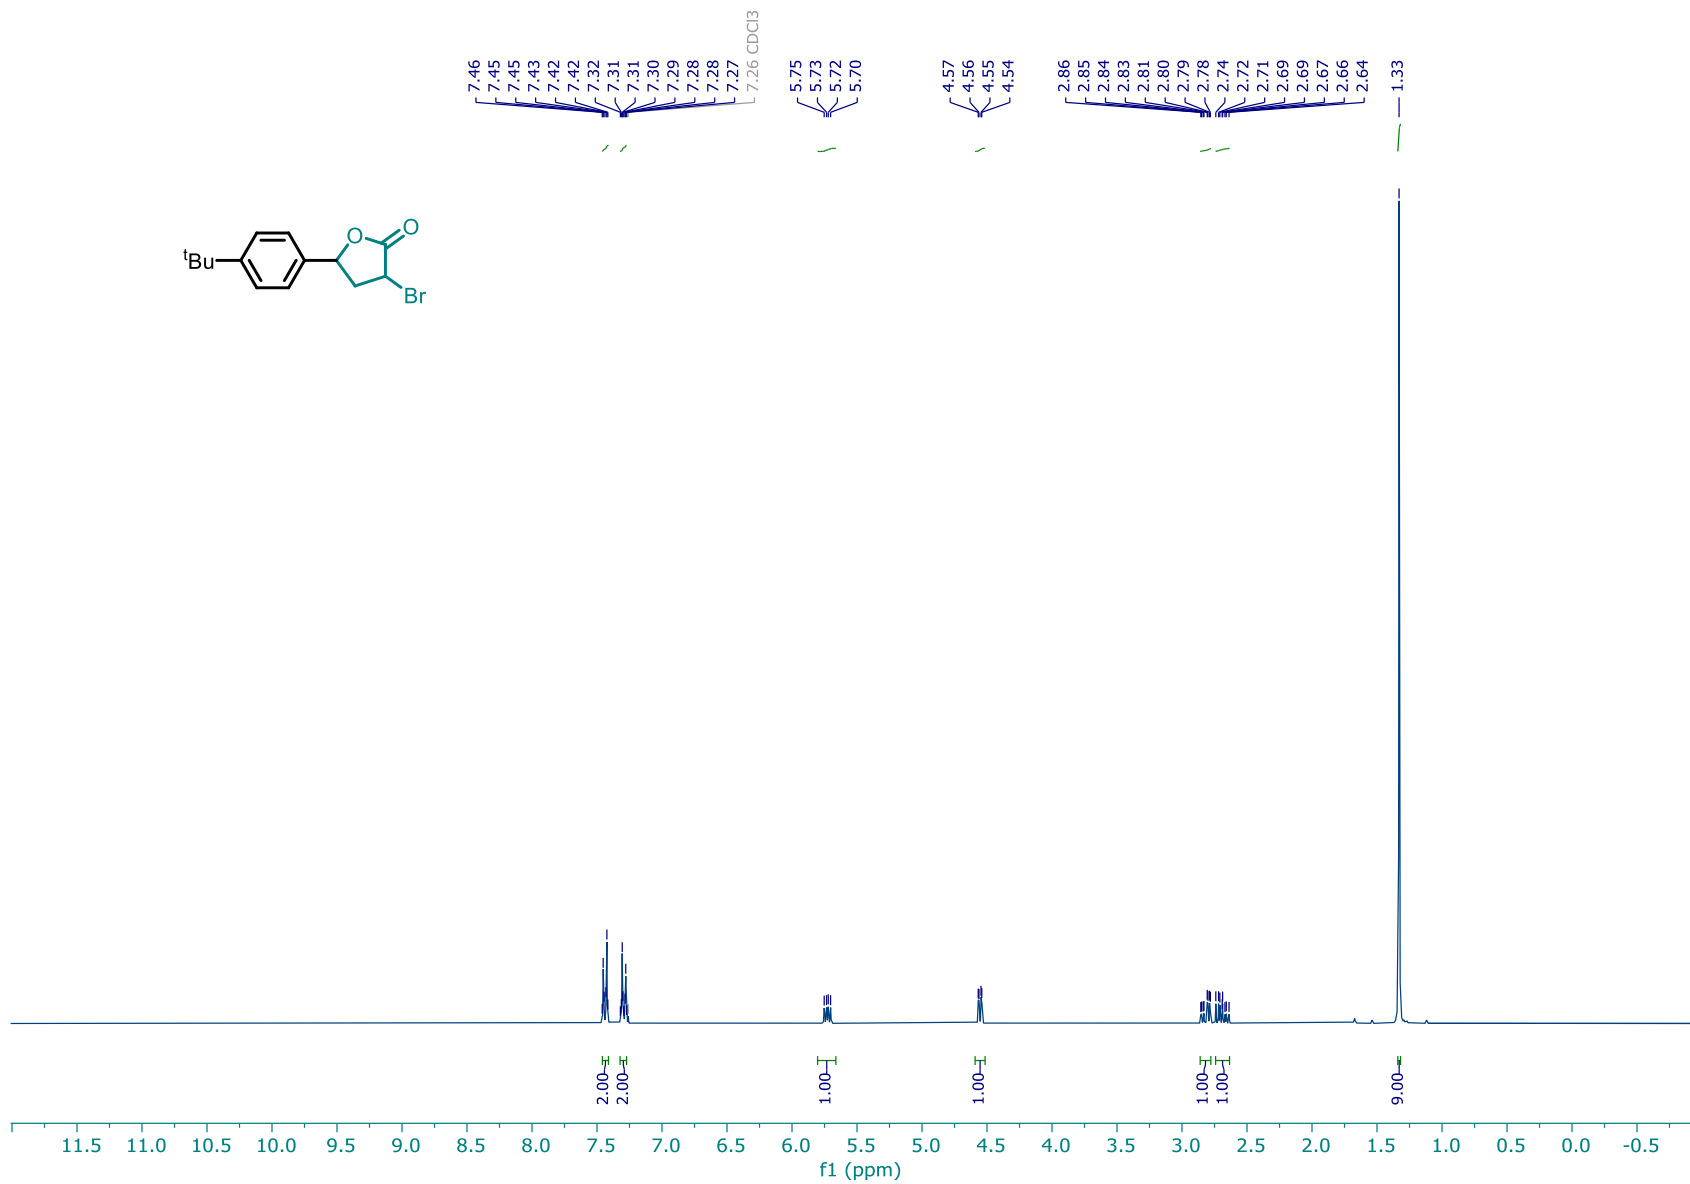

<sup>13</sup>C NMR (75 MHz, CDCl<sub>3</sub>) of **37**

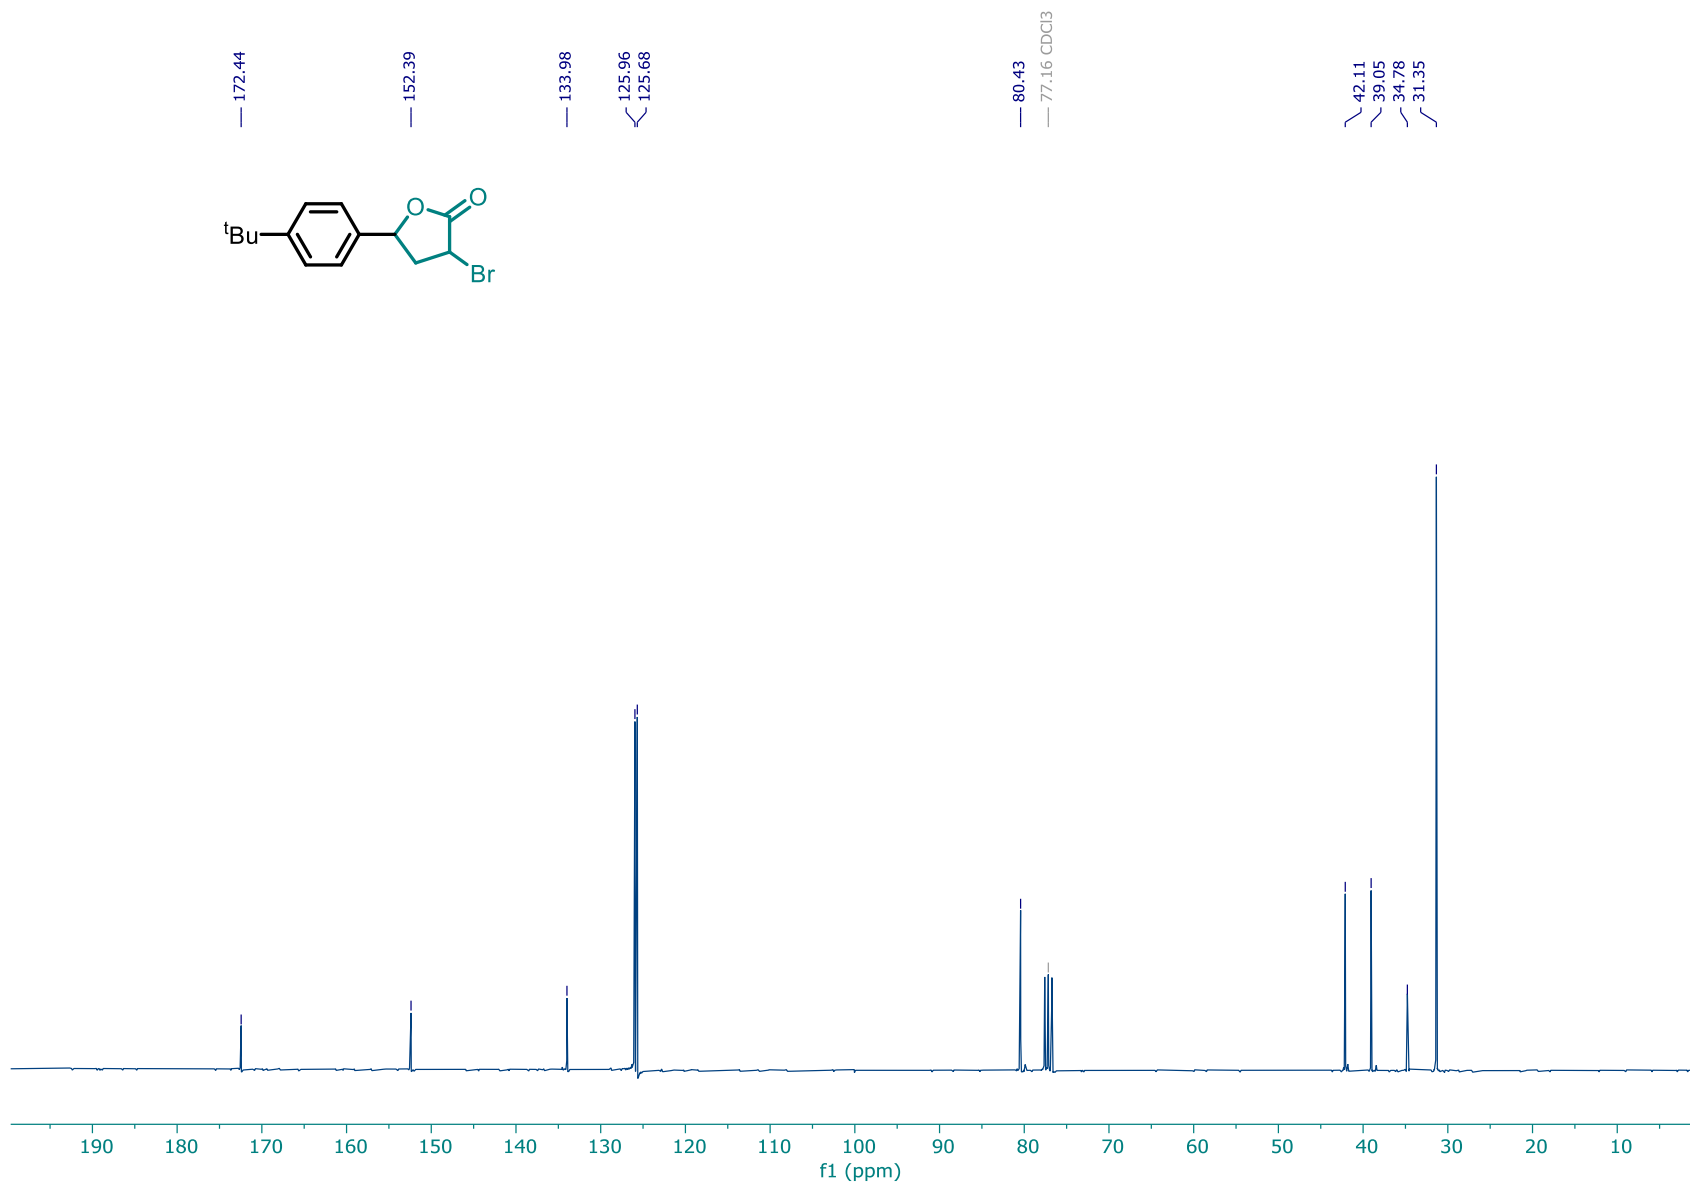

<sup>1</sup>H NMR (500 MHz, CDCl<sub>3</sub>) of **38**

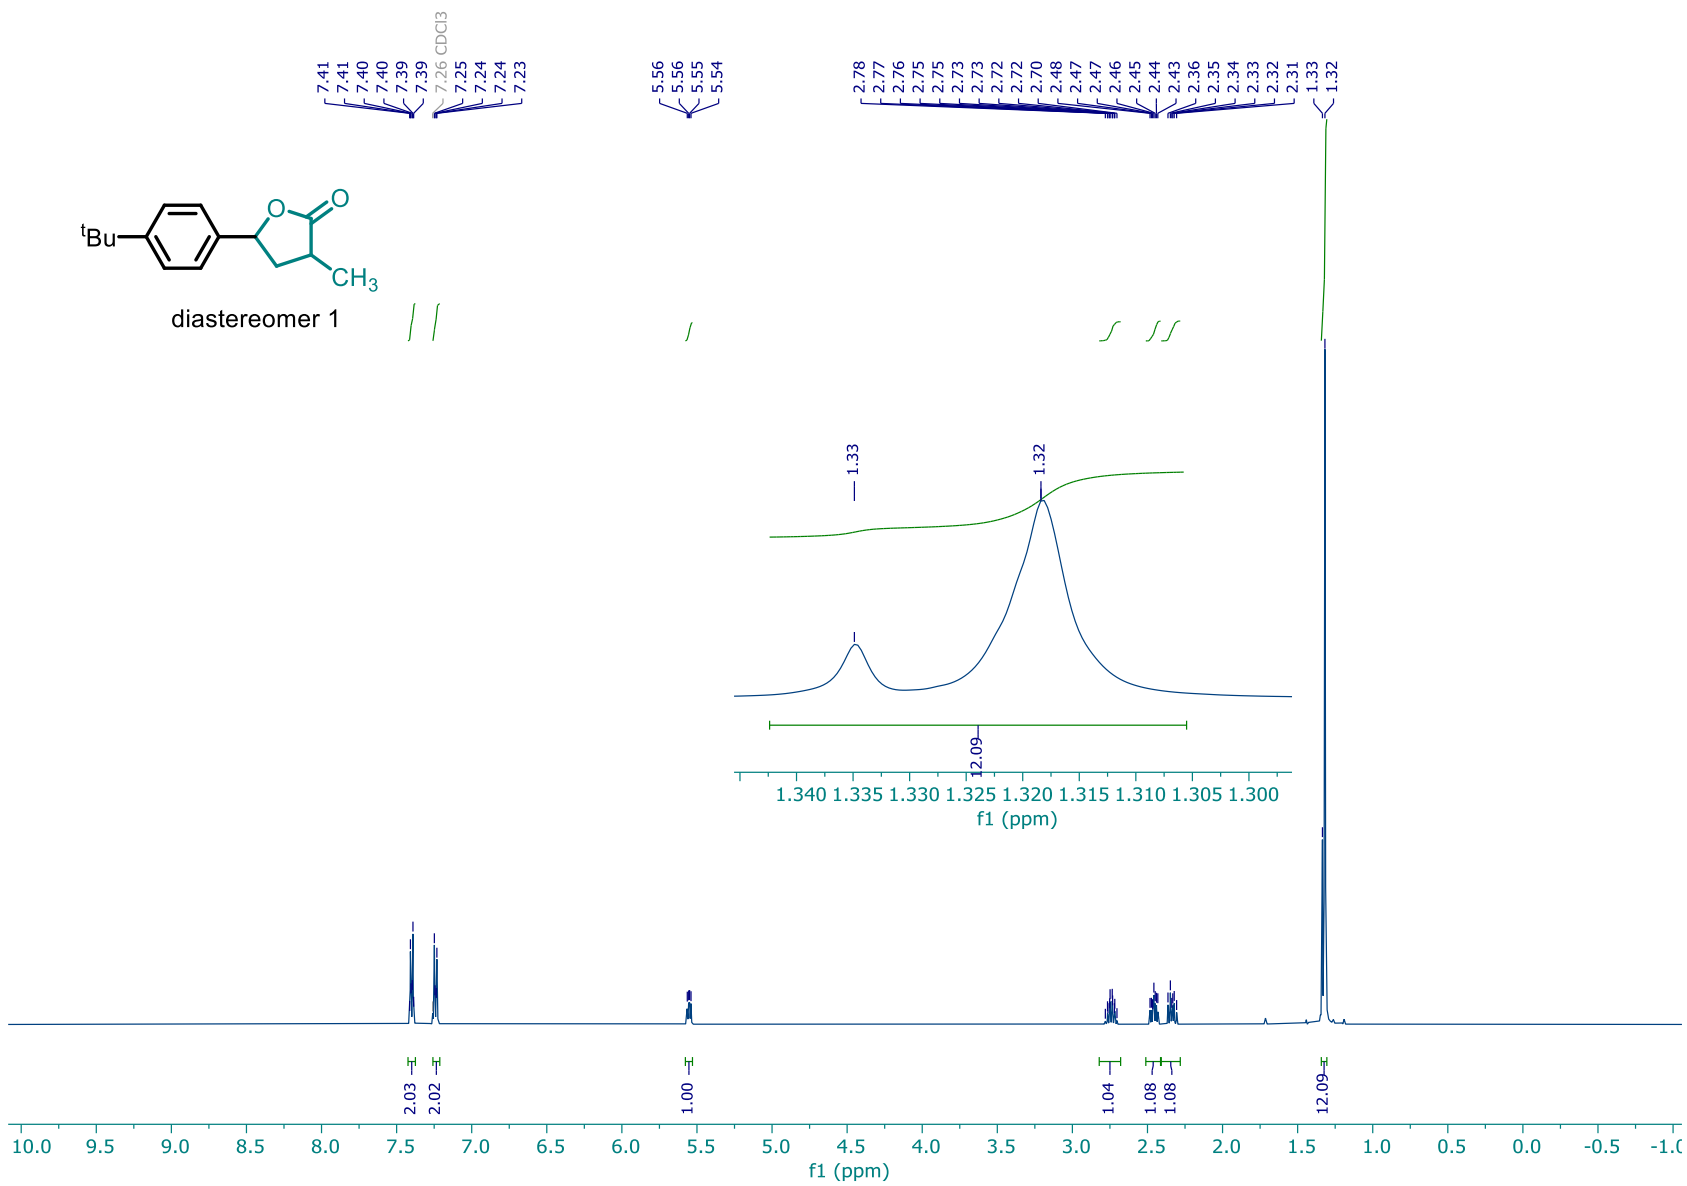

$^{13}\text{C}$  NMR (126 MHz,  $\text{CDCl}_3$ ) of **38**

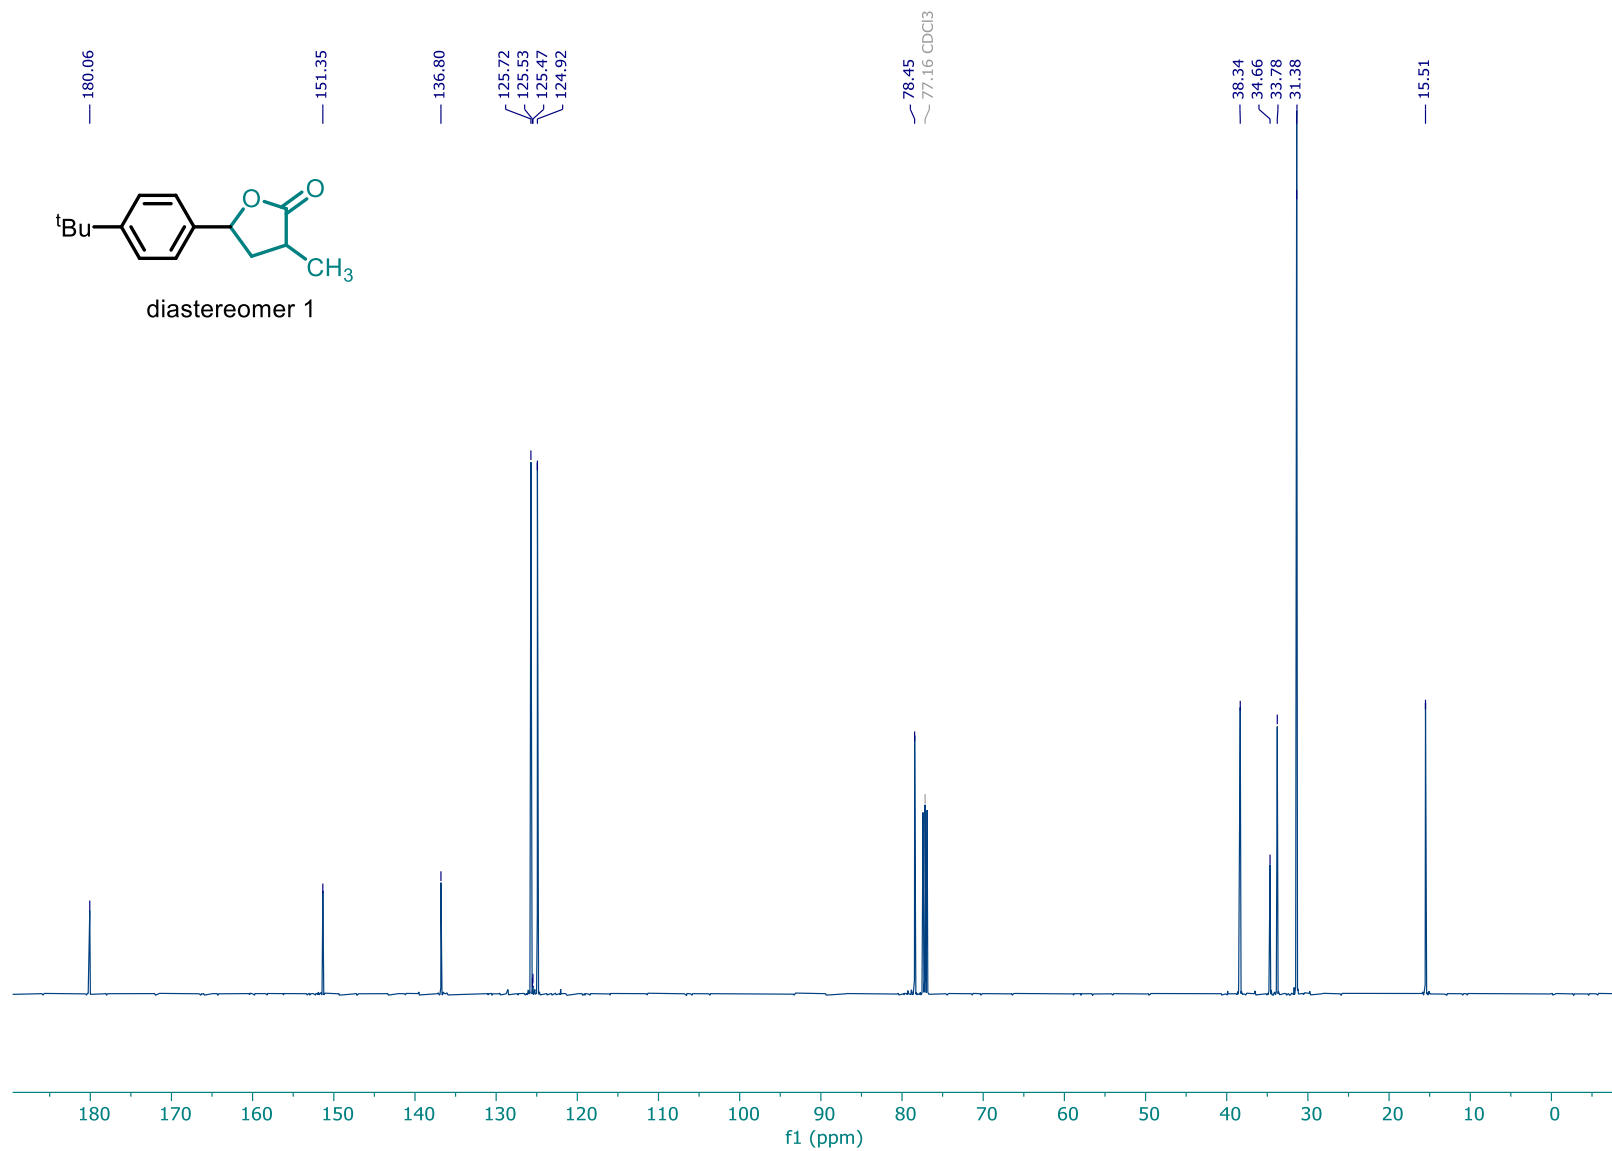

$^1\text{H}$  NMR (500 MHz,  $\text{CDCl}_3$ ) of **38**

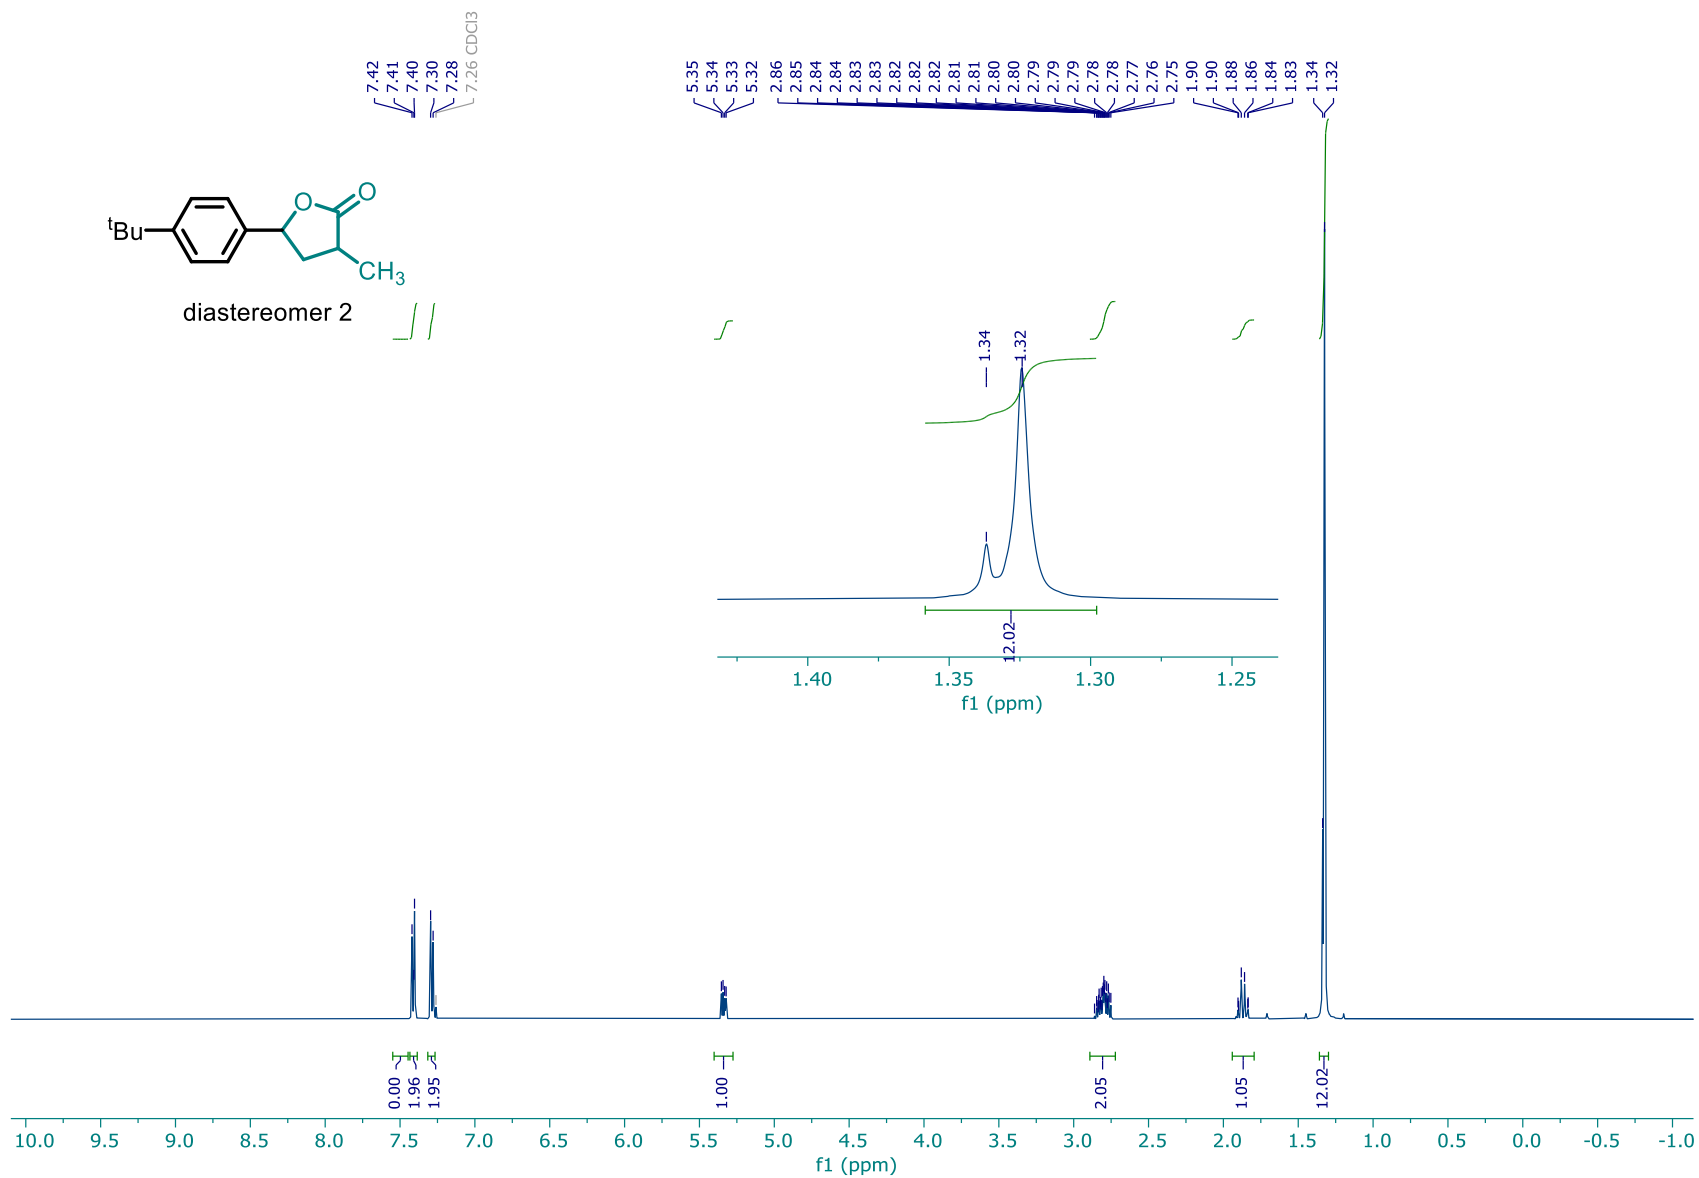

<sup>13</sup>C NMR (126 MHz, CDCl<sub>3</sub>) of **38**

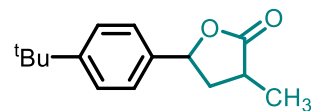

diastereomer 2

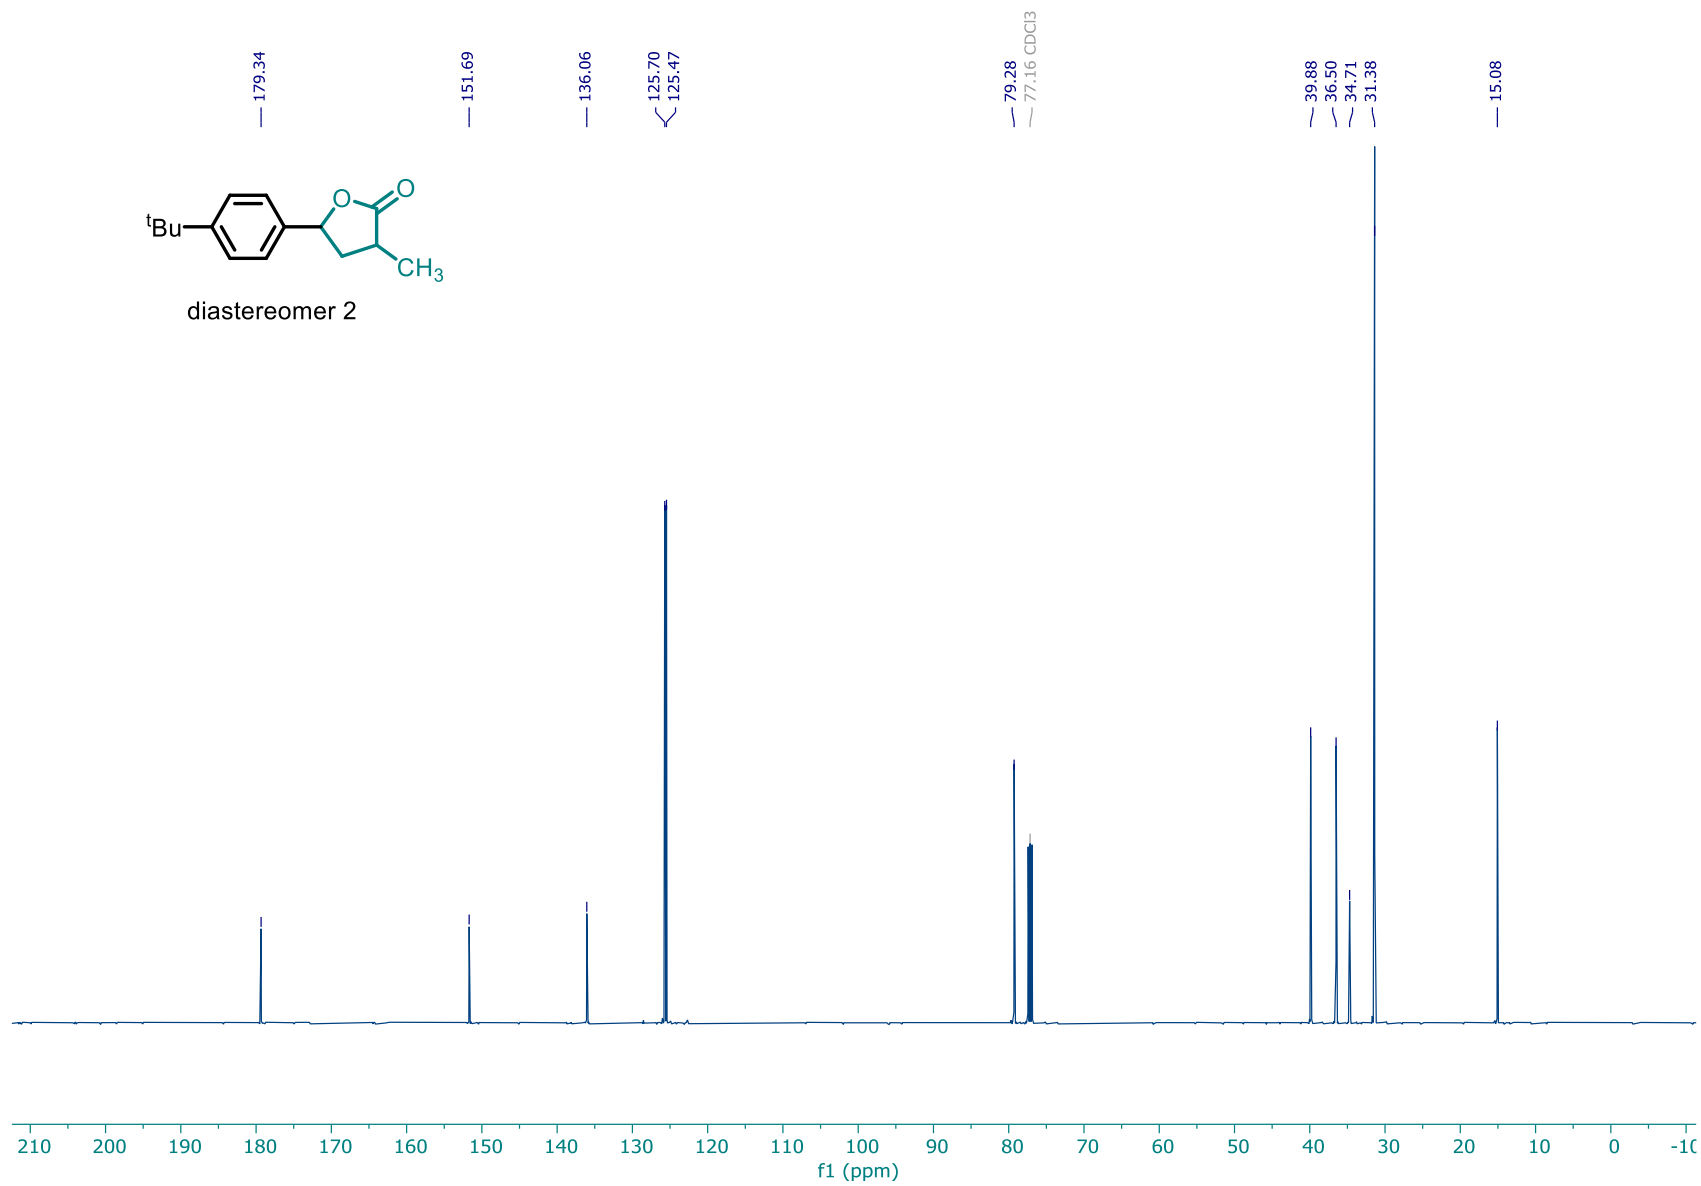



<sup>1</sup>H NMR (300 MHz, CDCl<sub>3</sub>) of **39a**

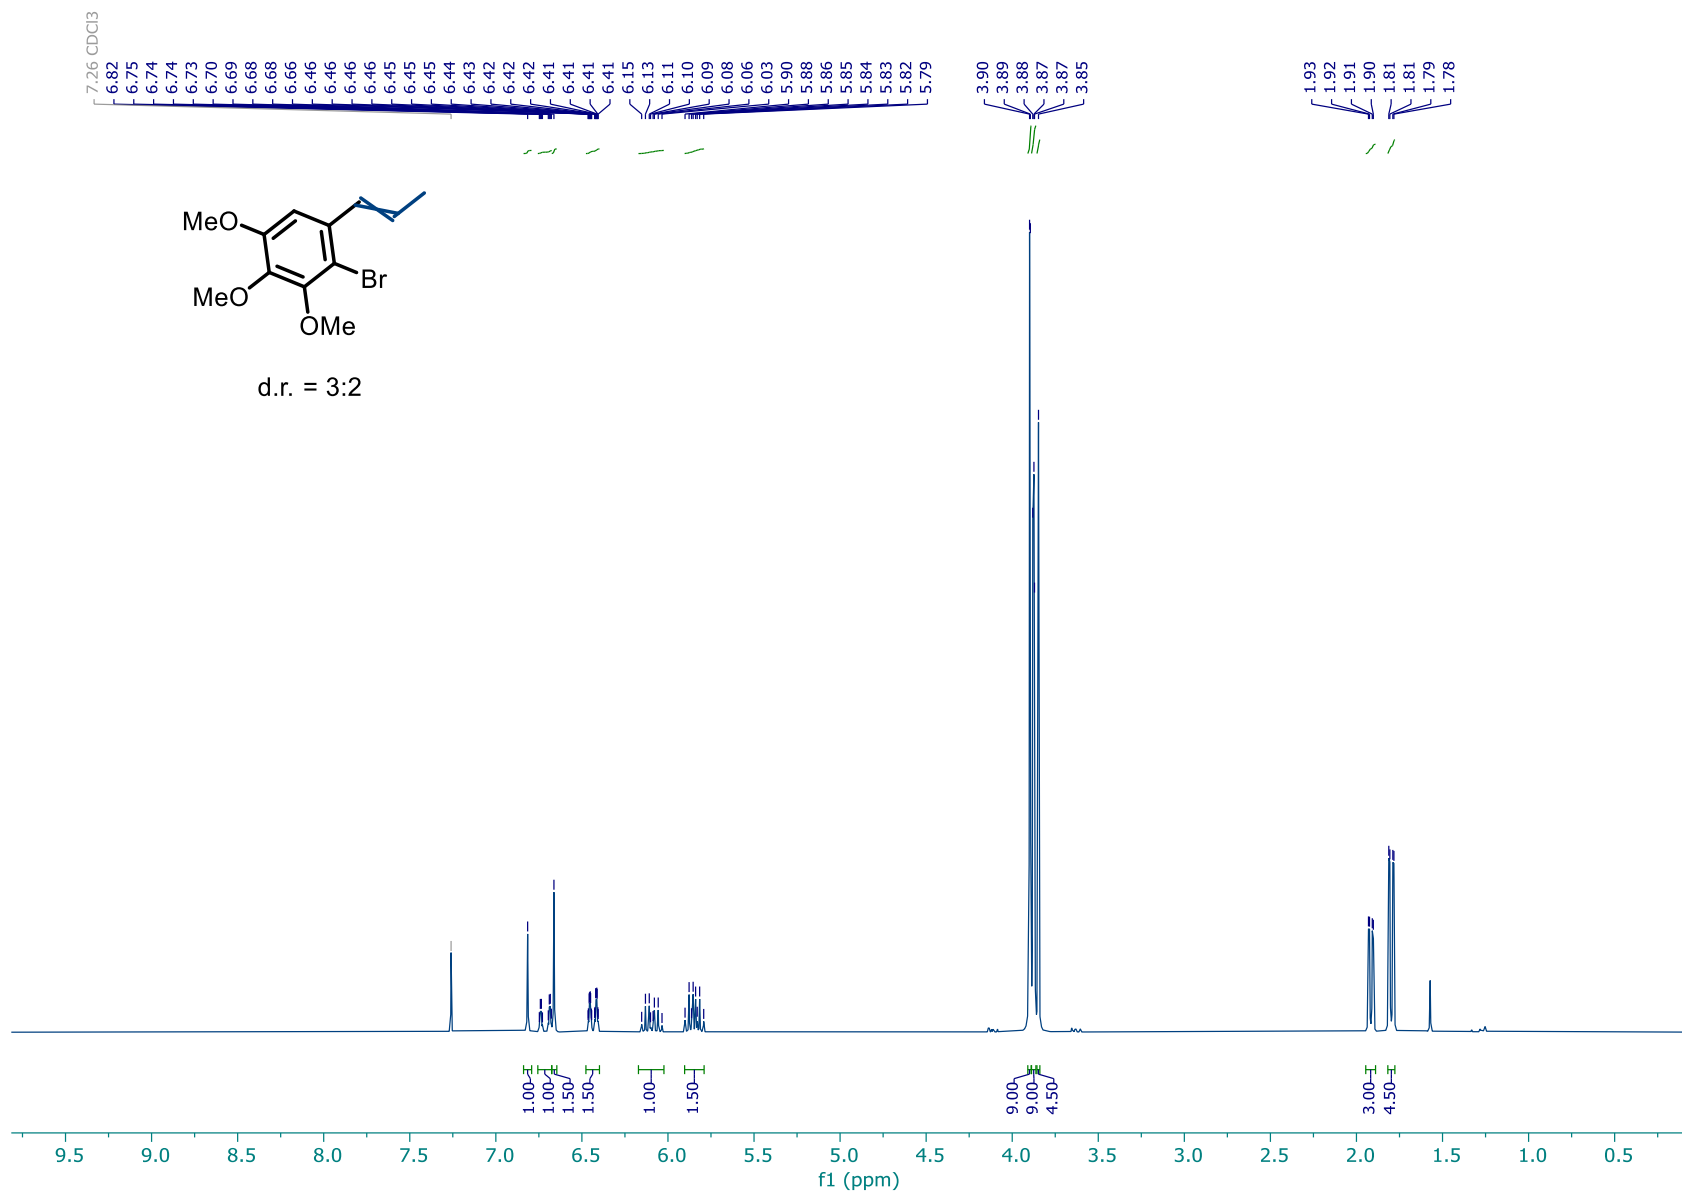

<sup>13</sup>C NMR (75 MHz, CDCl<sub>3</sub>) of **39a**

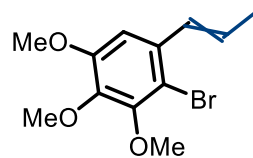

d.r. = 3:2

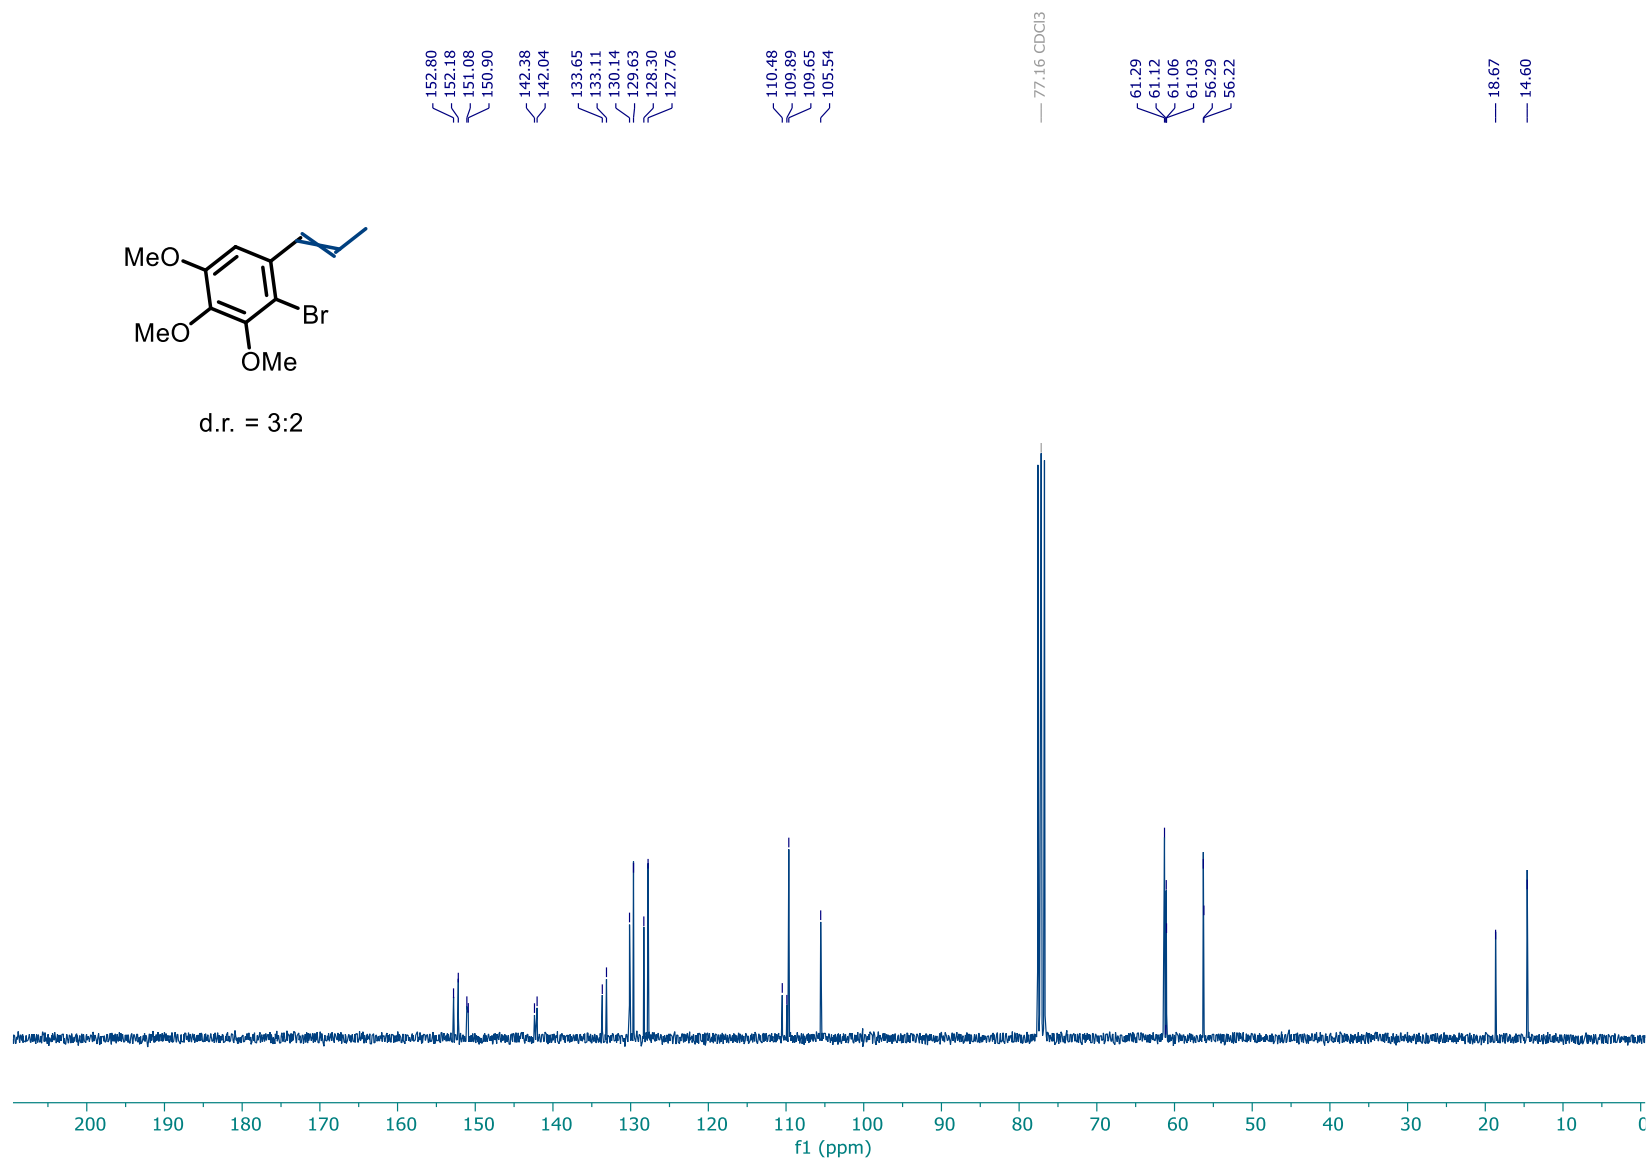

<sup>1</sup>H NMR (300 MHz, CDCl<sub>3</sub>) of **39**

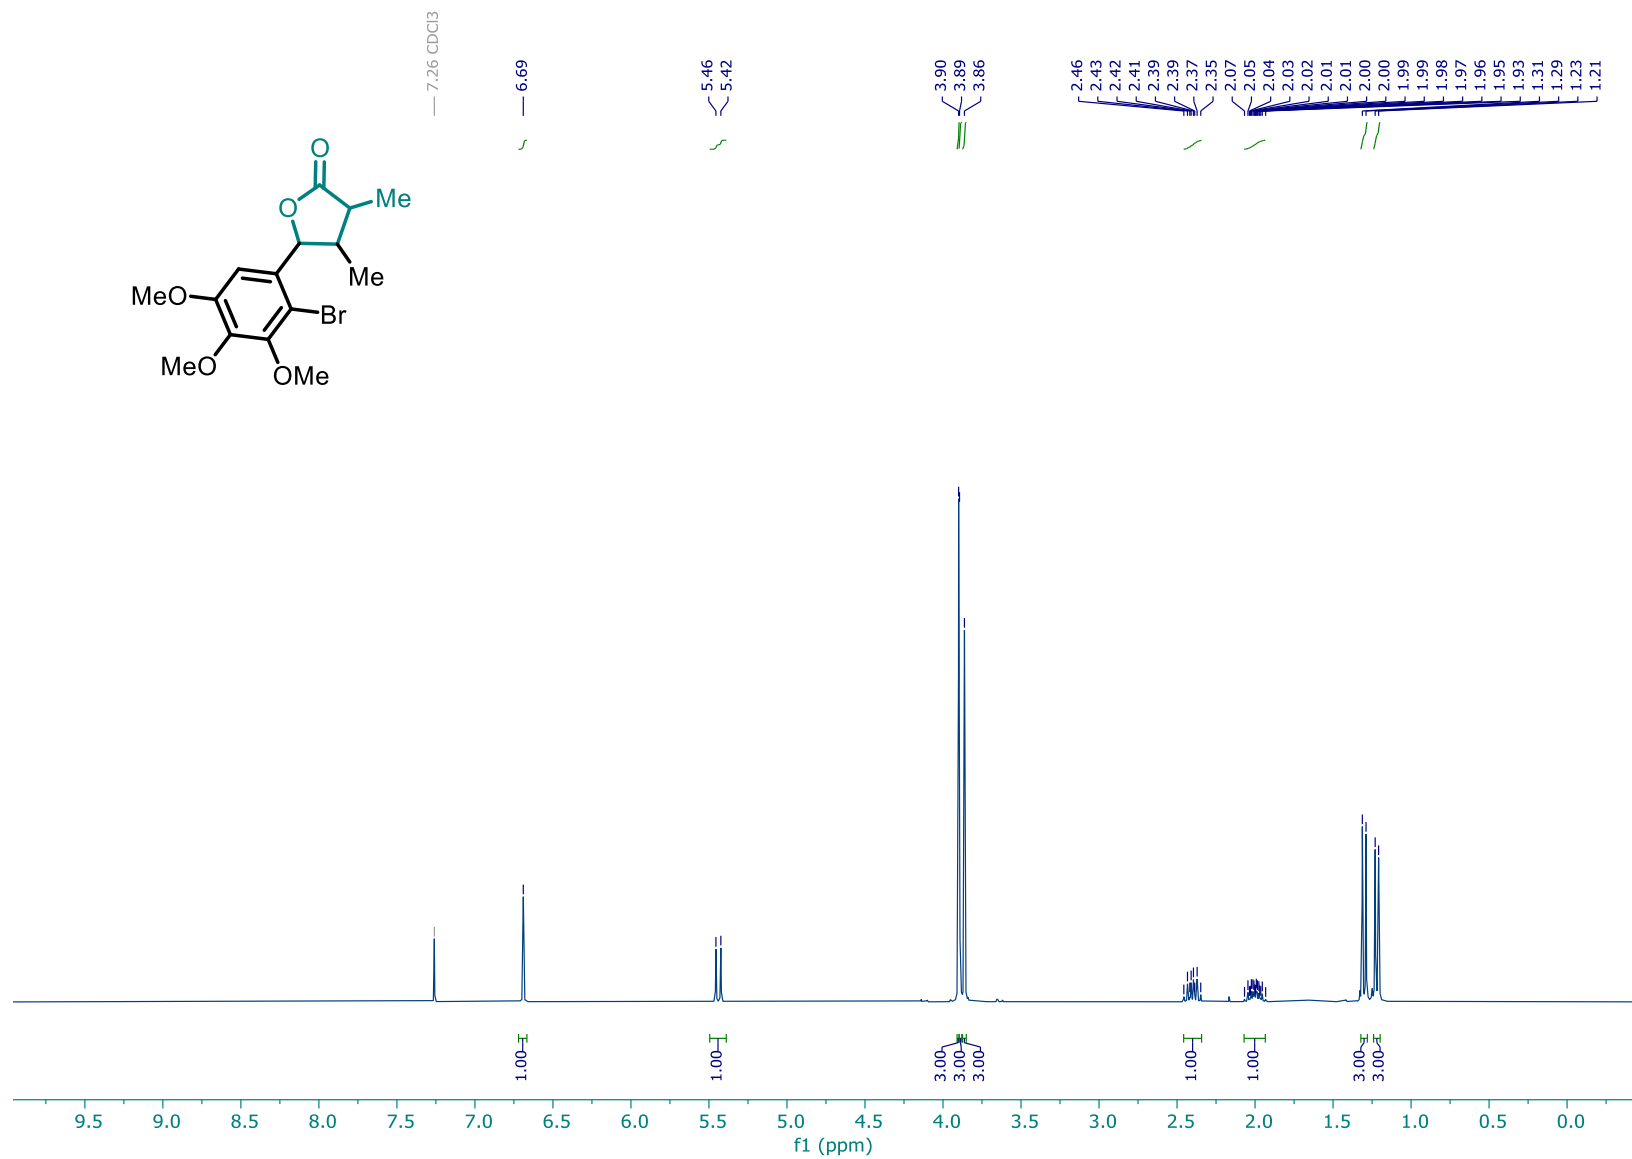

<sup>13</sup>C NMR (126 MHz, CDCl<sub>3</sub>) of **39**

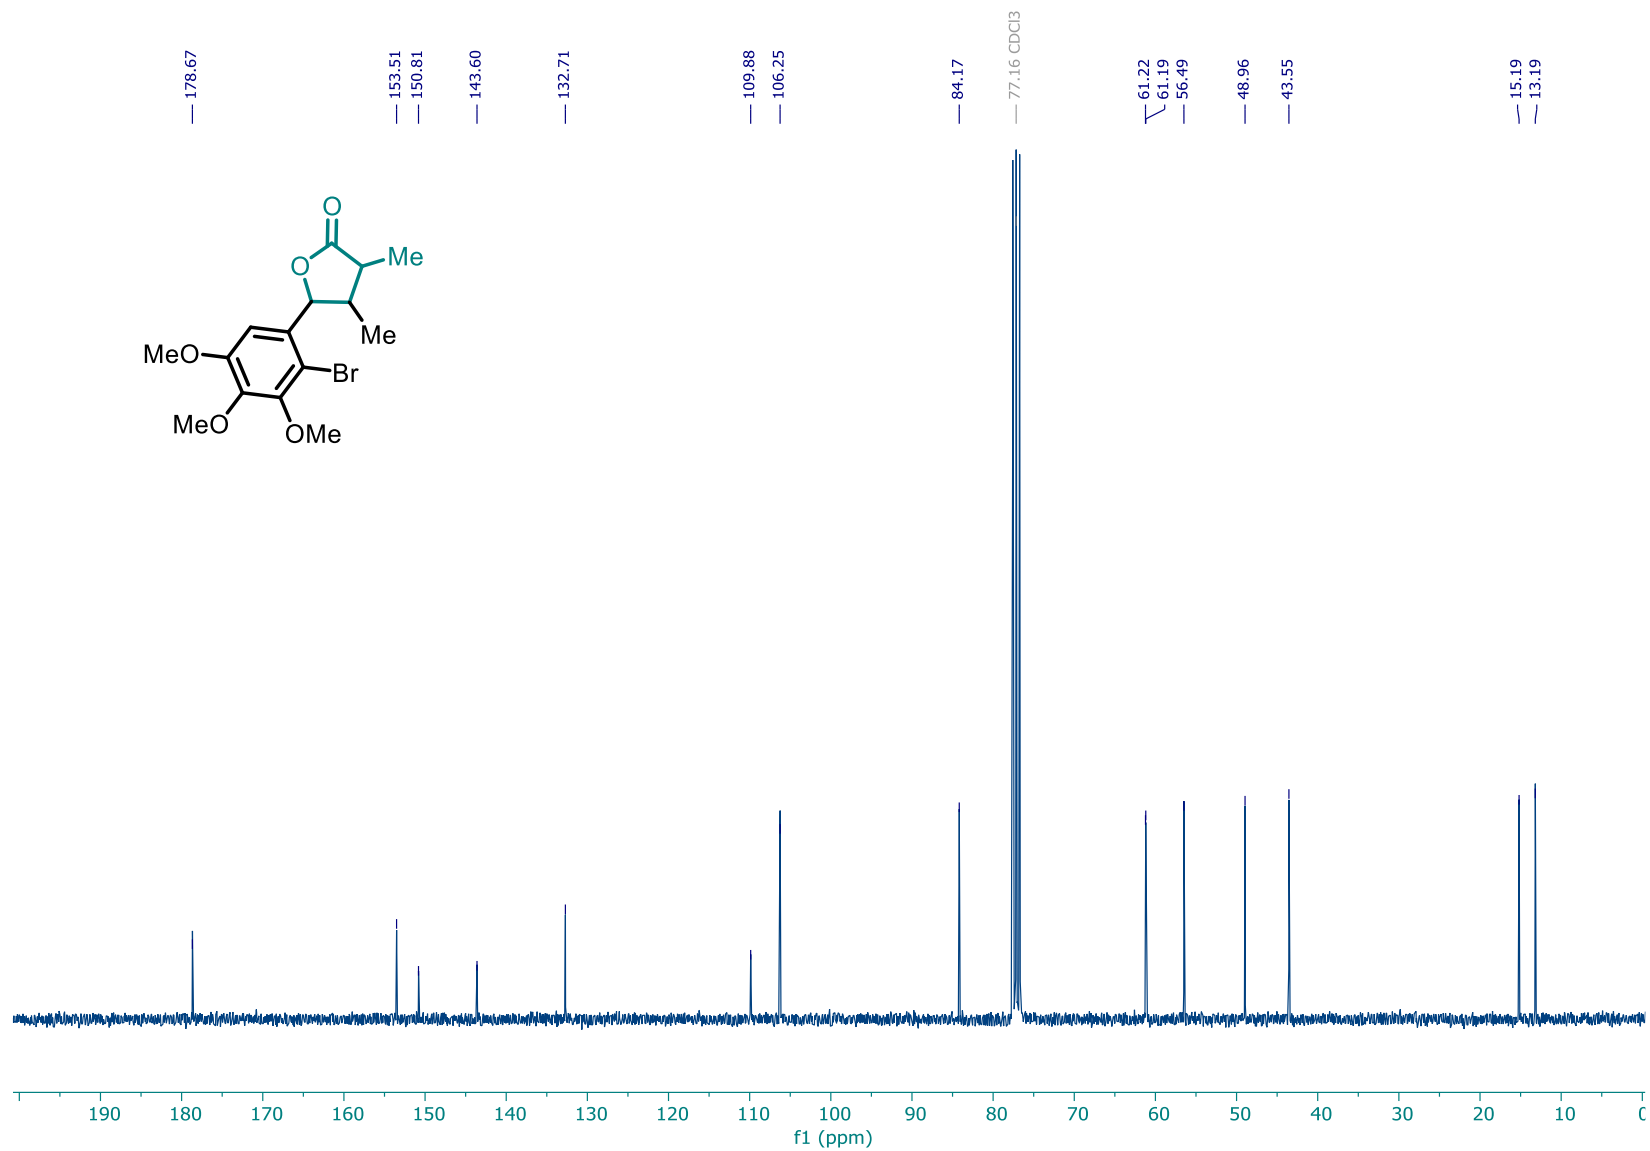

<sup>1</sup>H NMR (500 MHz, CDCl<sub>3</sub>) of **40**

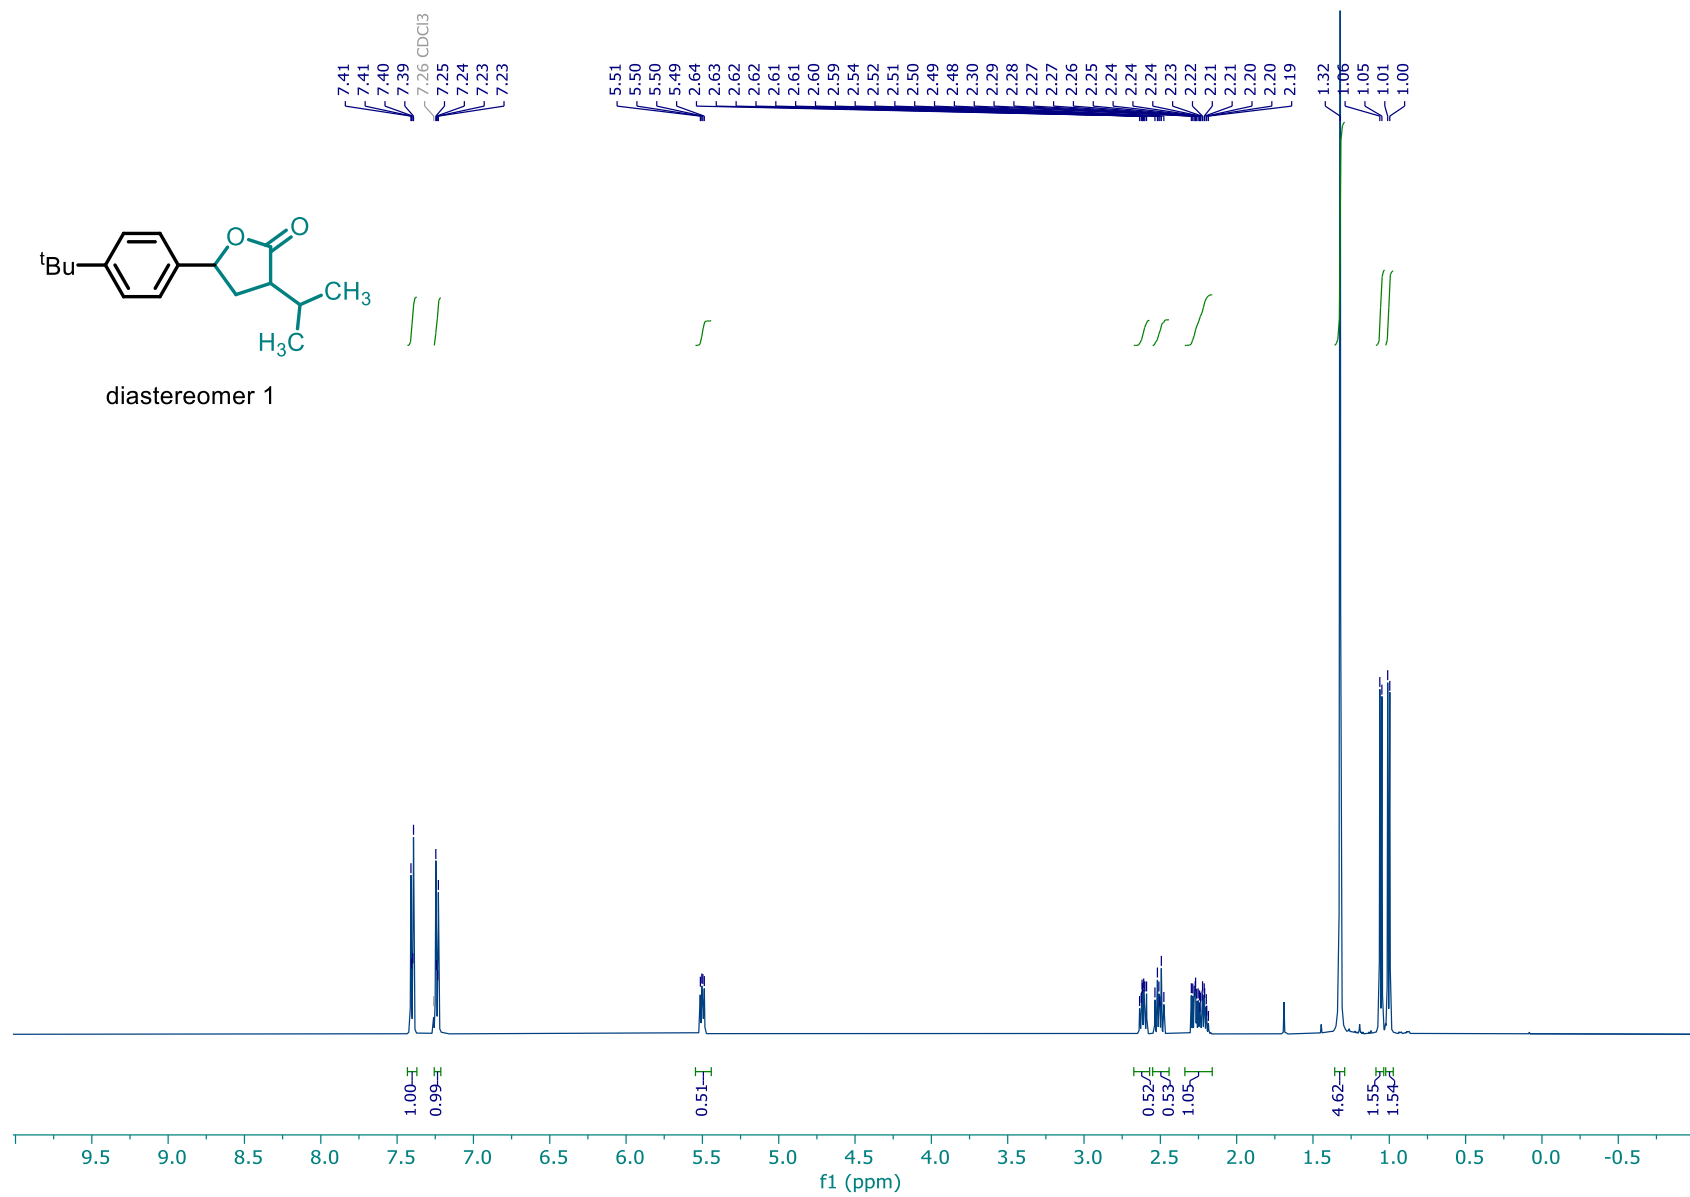

$^{13}\text{C}$  NMR (126 MHz,  $\text{CDCl}_3$ ) of **40**

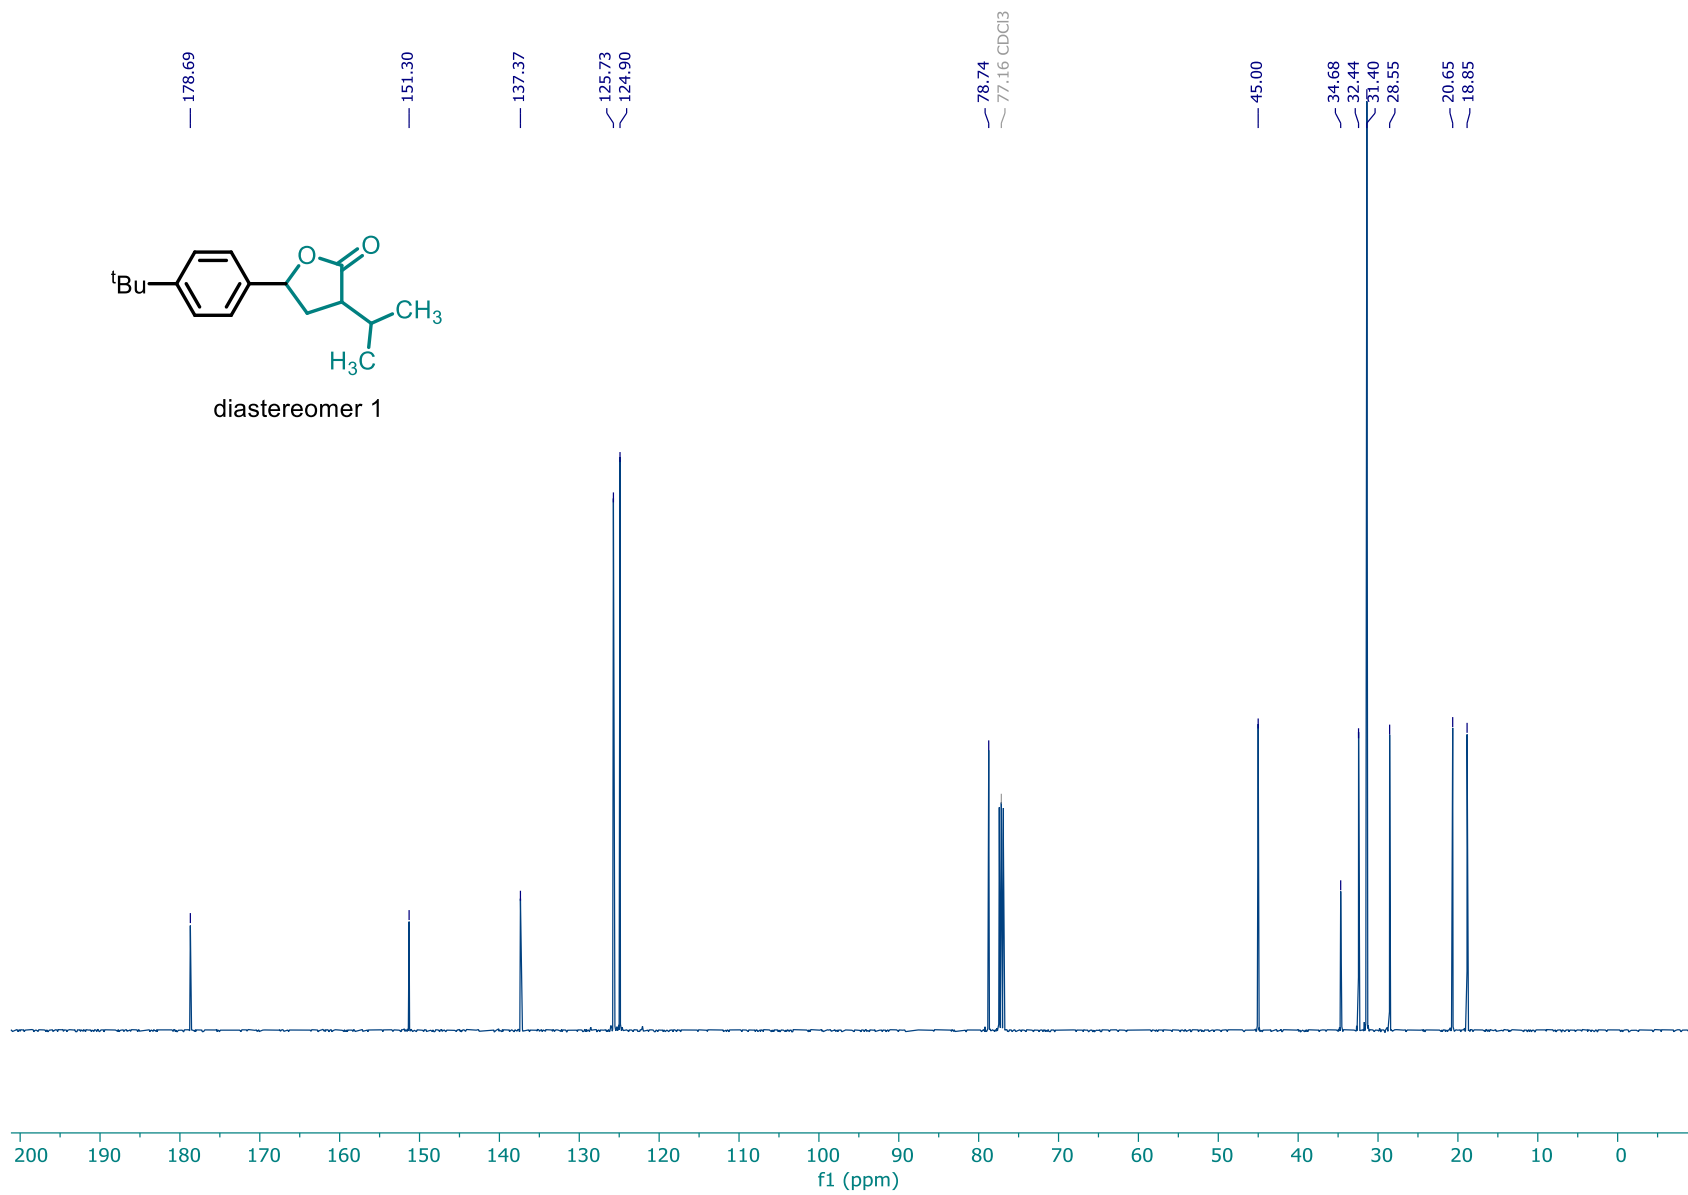

<sup>1</sup>H NMR (500 MHz, CDCl<sub>3</sub>) of **40**

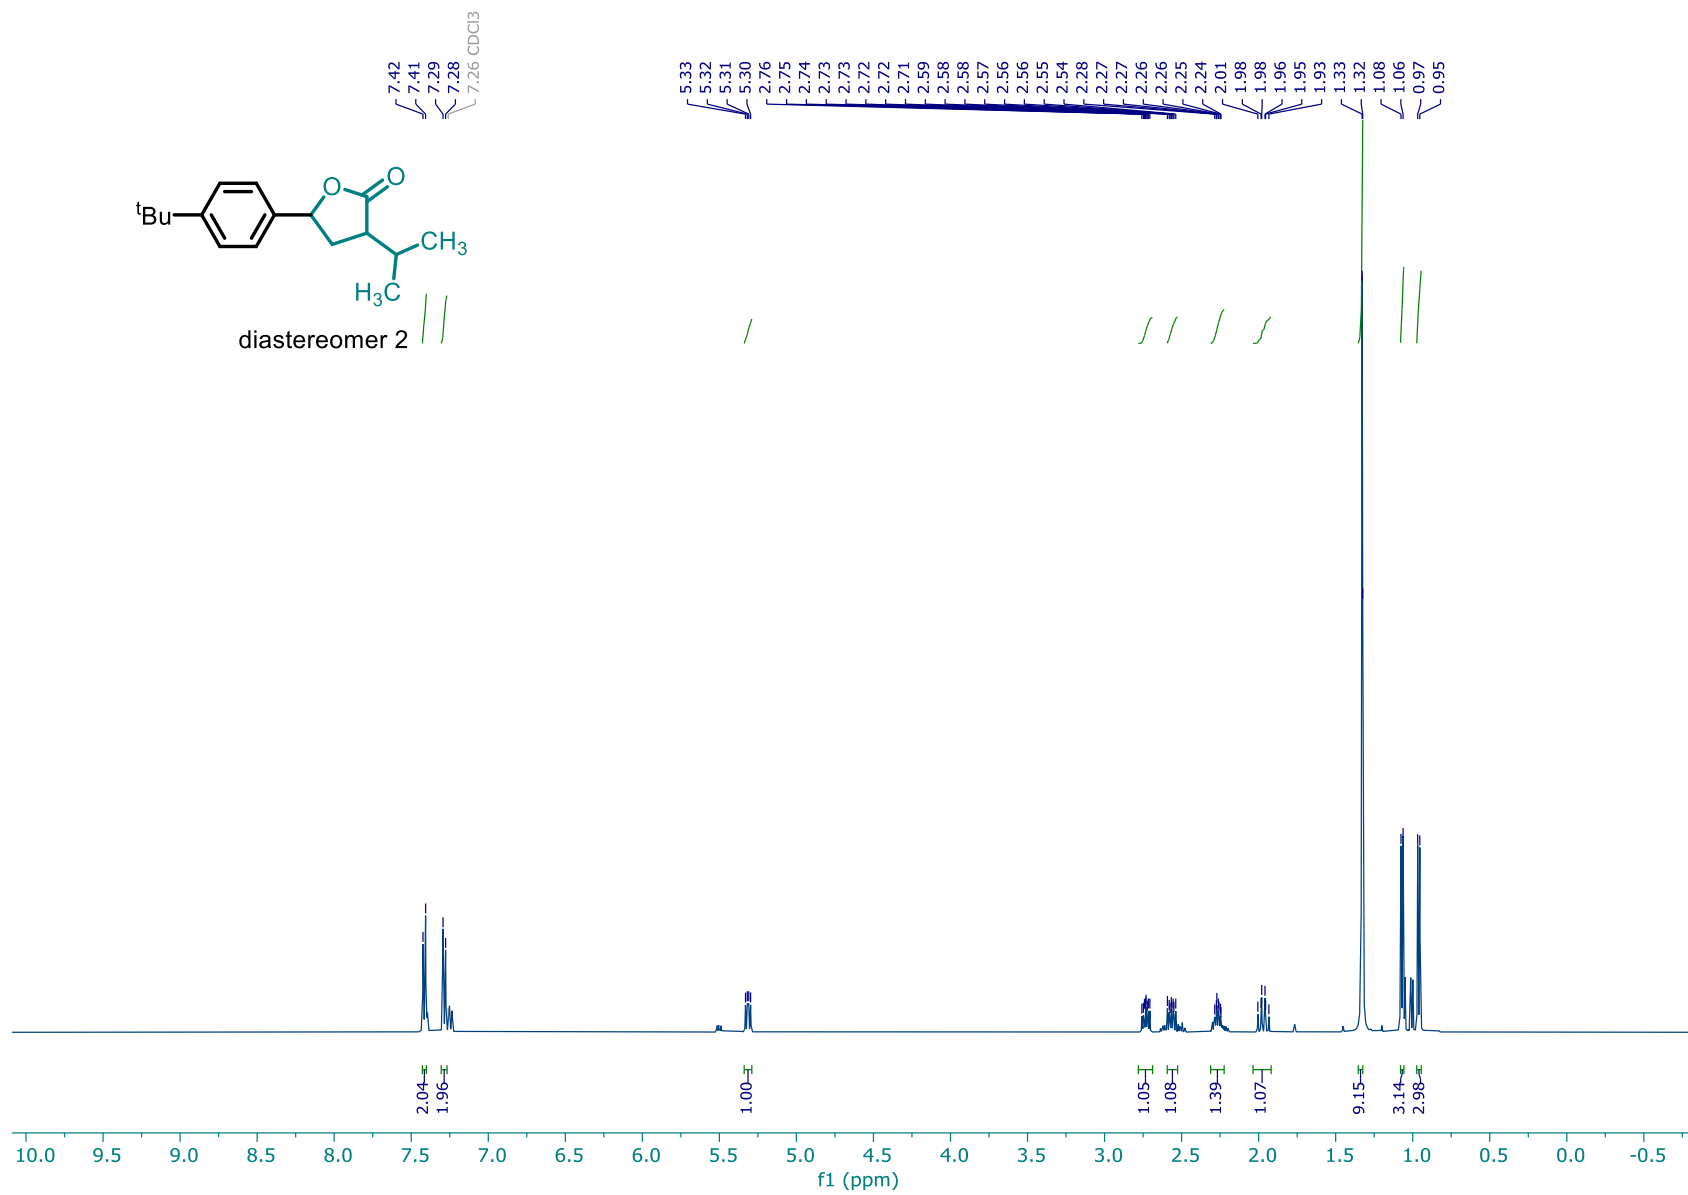

<sup>13</sup>C NMR (126 MHz, CDCl<sub>3</sub>) of **40**

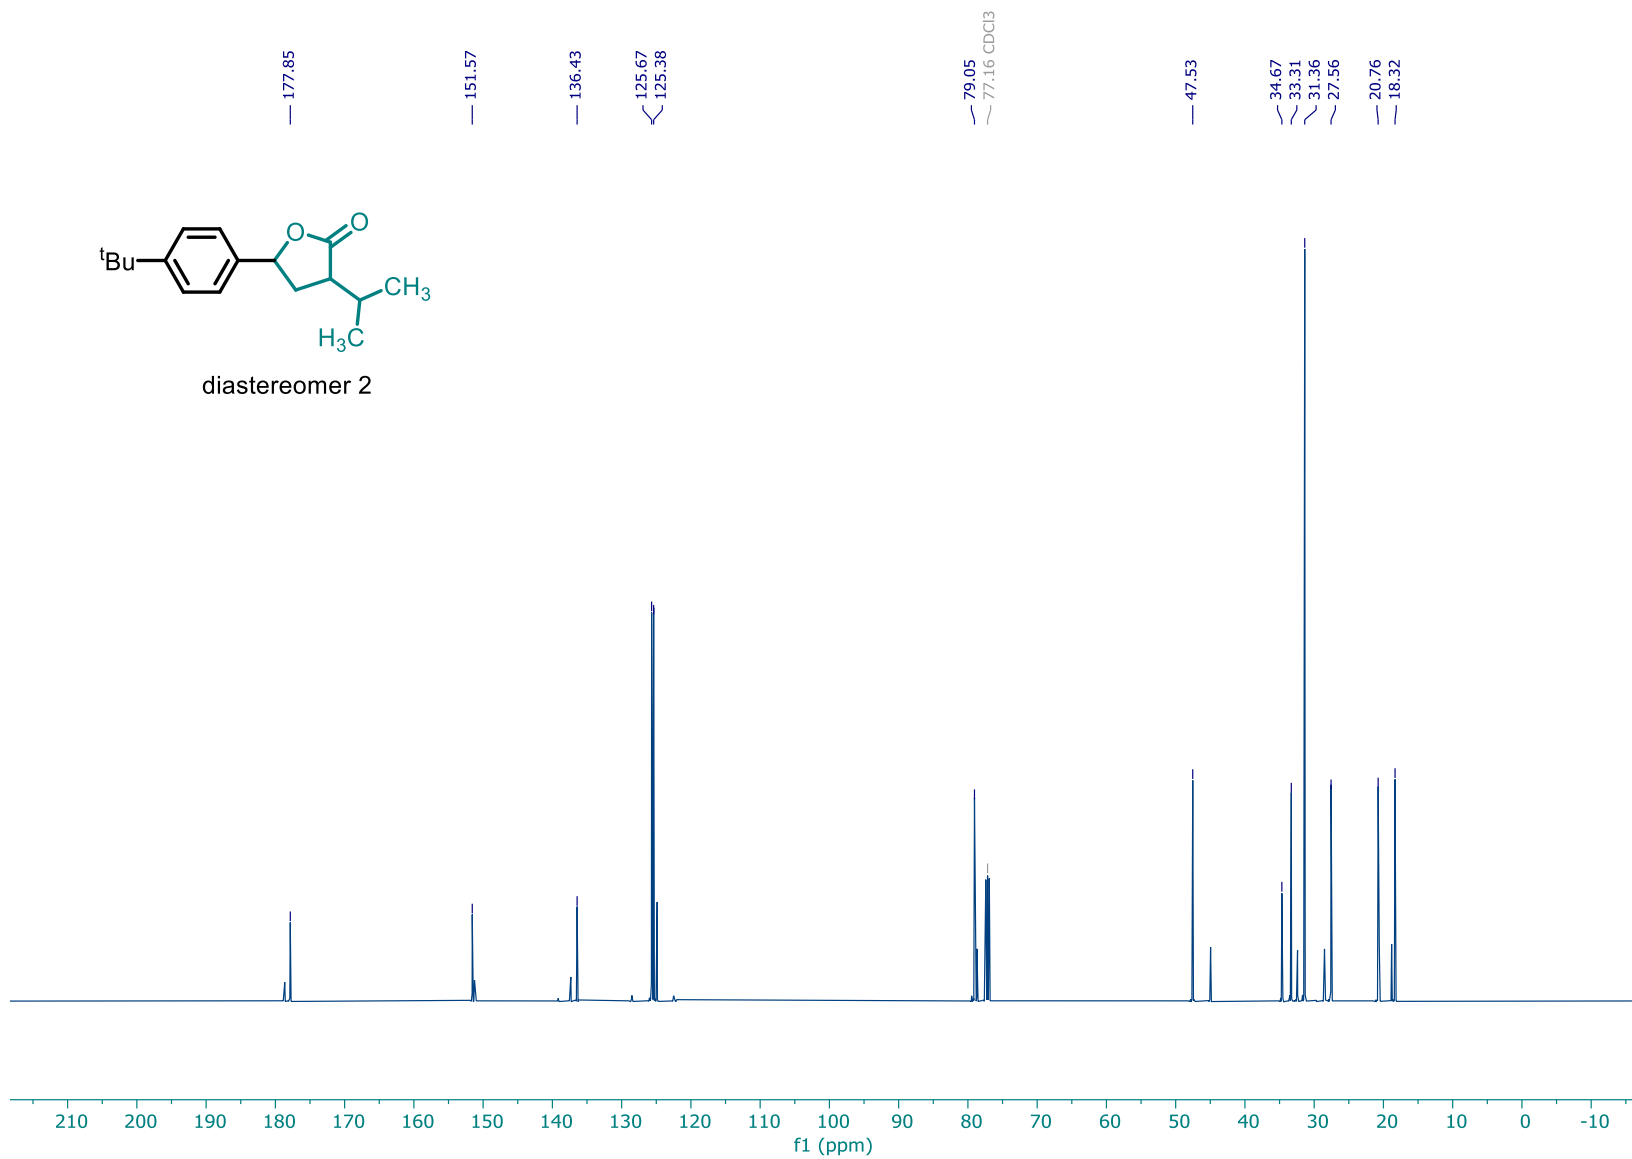



$^1\text{H}$  NMR (300 MHz,  $\text{CDCl}_3$ ) of **41**

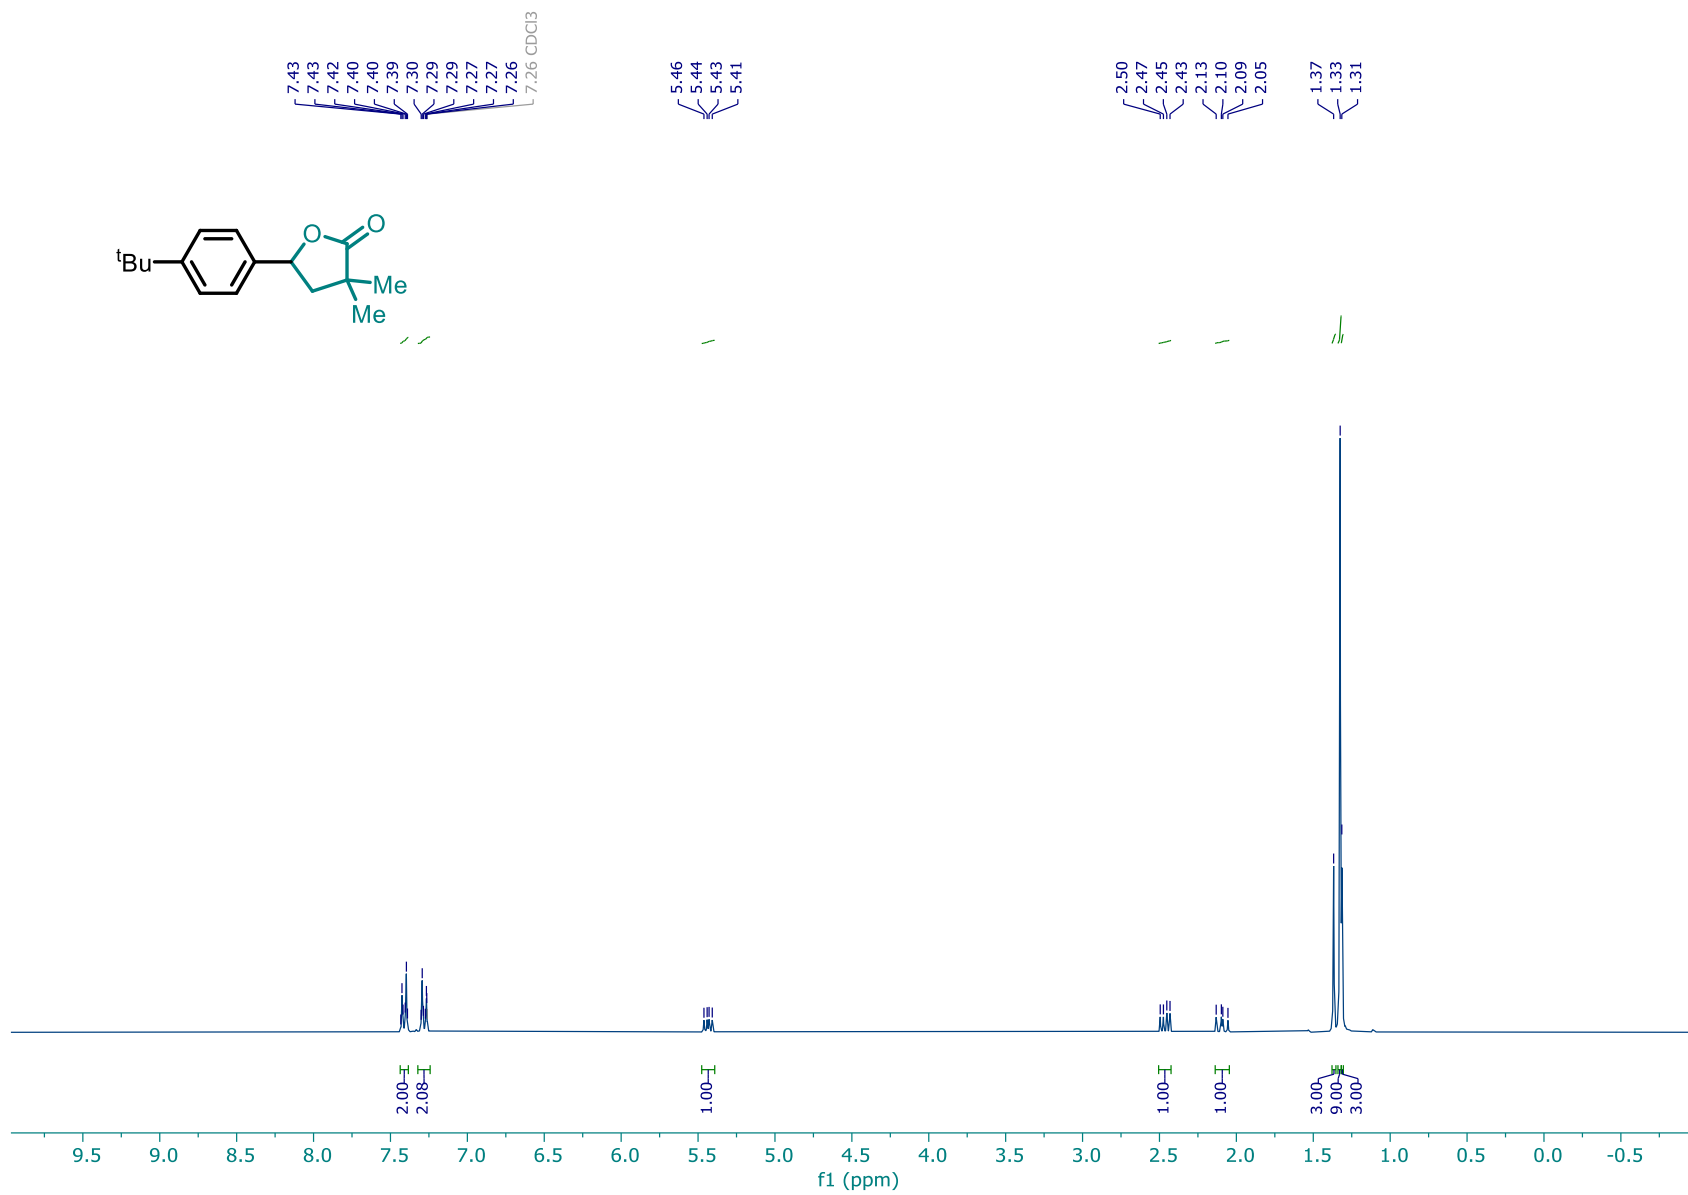

<sup>13</sup>C NMR (75 MHz, CDCl<sub>3</sub>) of **41**

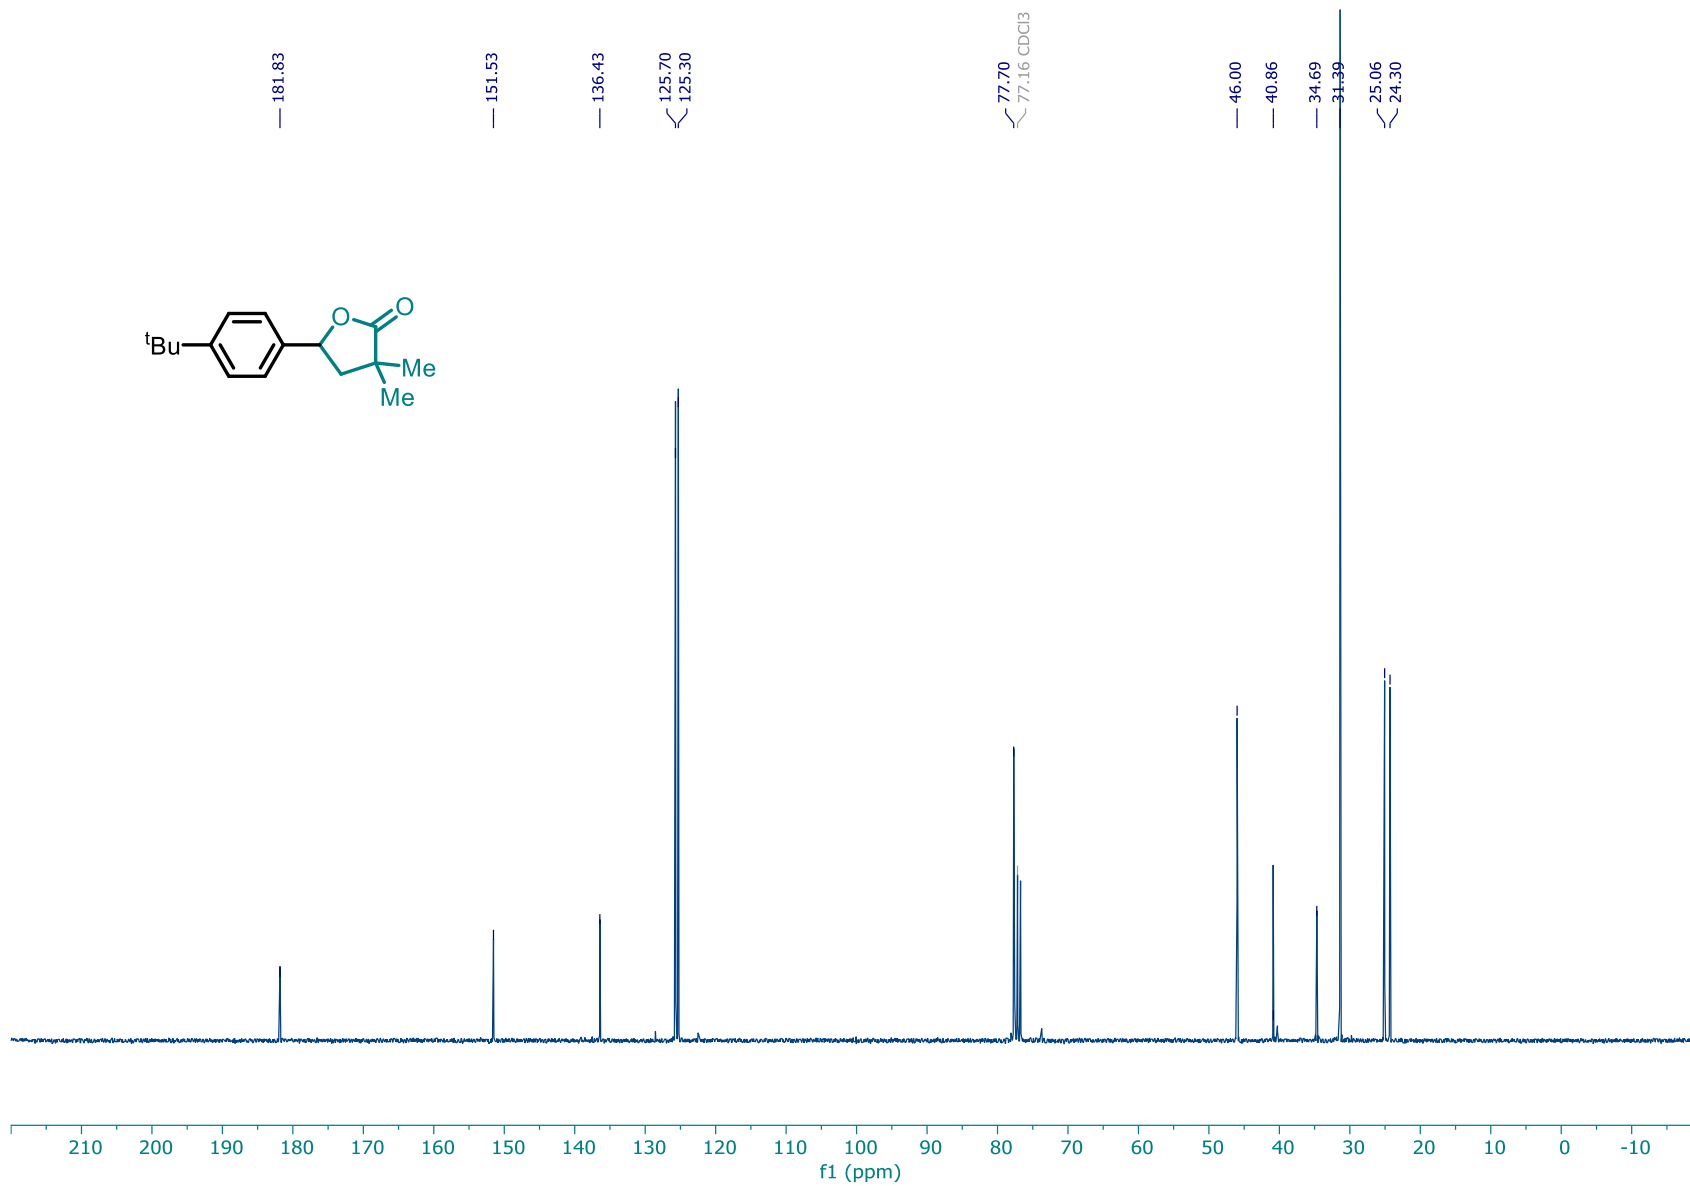

<sup>1</sup>H NMR (300 MHz, CDCl<sub>3</sub>) of **42**

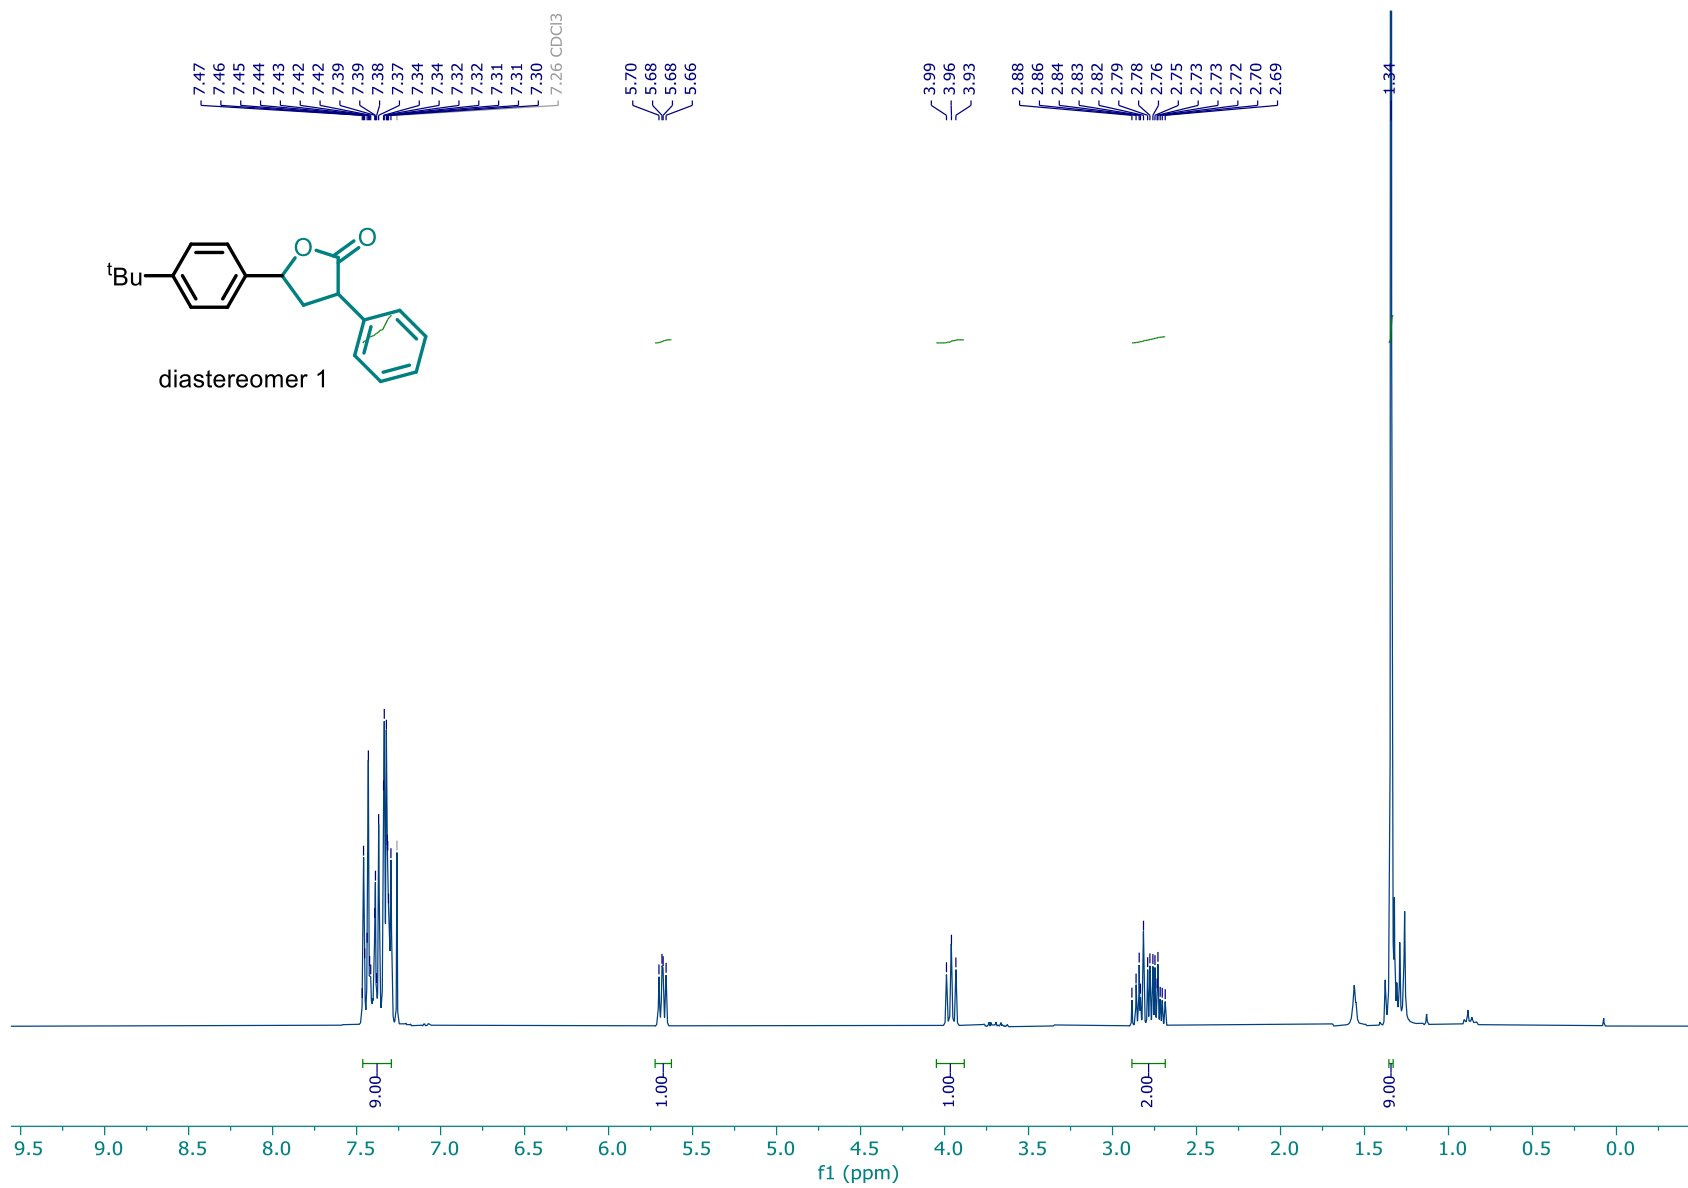

$^{13}\text{C}$  NMR (75 MHz,  $\text{CDCl}_3$ ) of **42**

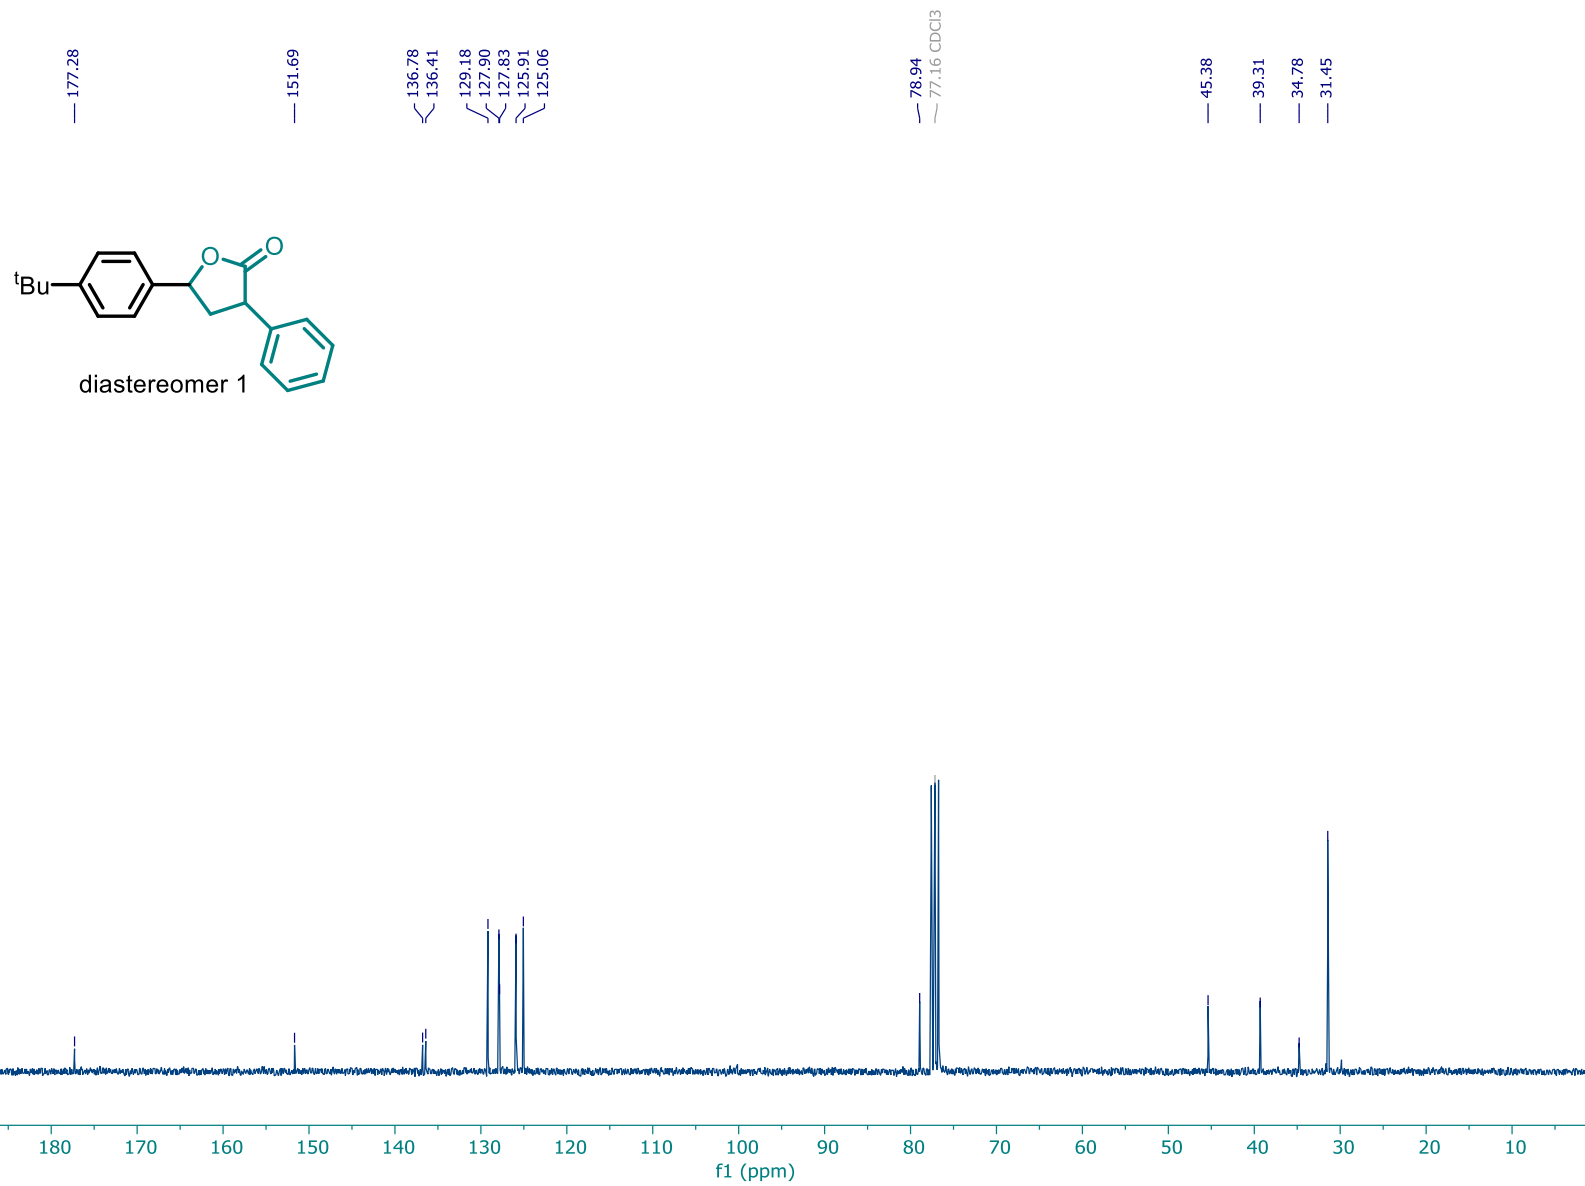

<sup>1</sup>H NMR (300 MHz, CDCl<sub>3</sub>) of **42**

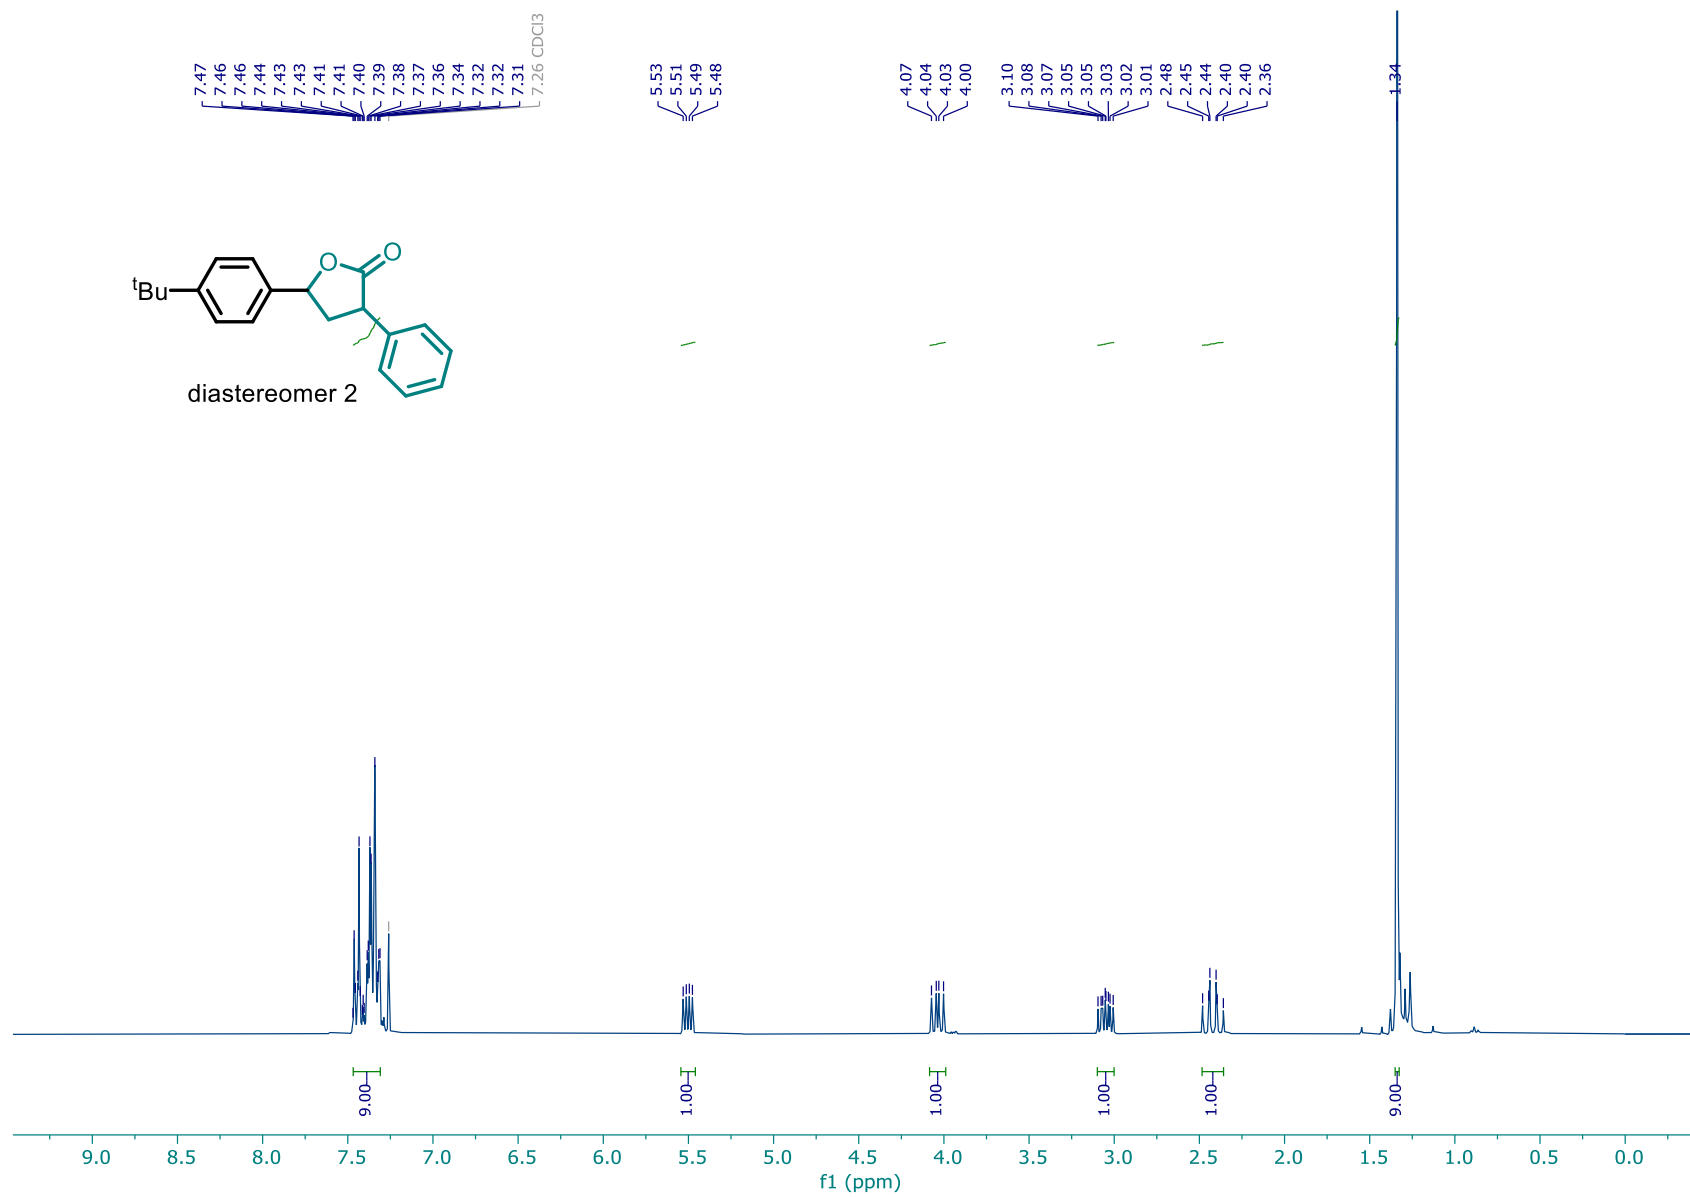

$^{13}\text{C}$  NMR (75 MHz,  $\text{CDCl}_3$ ) of **42**

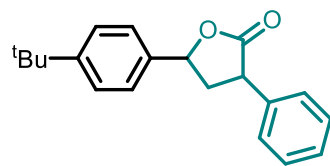

diastereomer 2

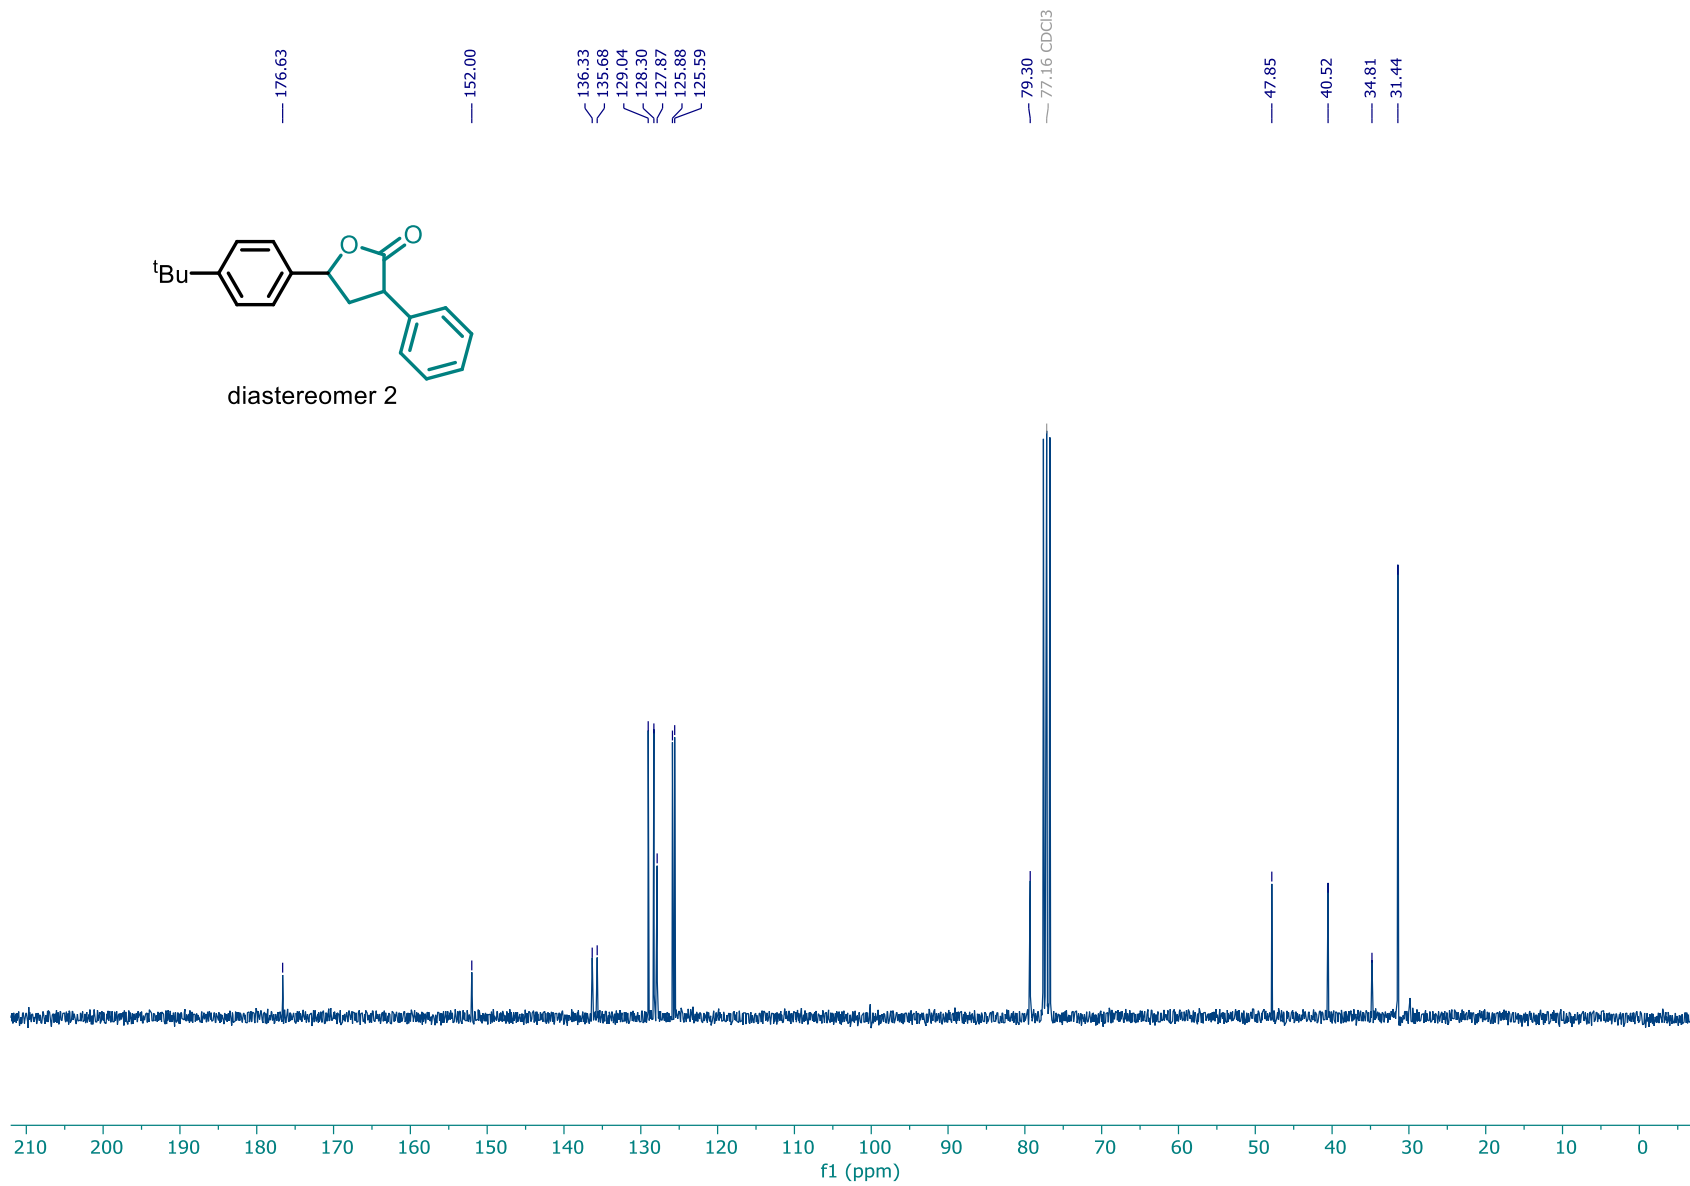

<sup>1</sup>H NMR (300 MHz, CDCl<sub>3</sub>) of **43**

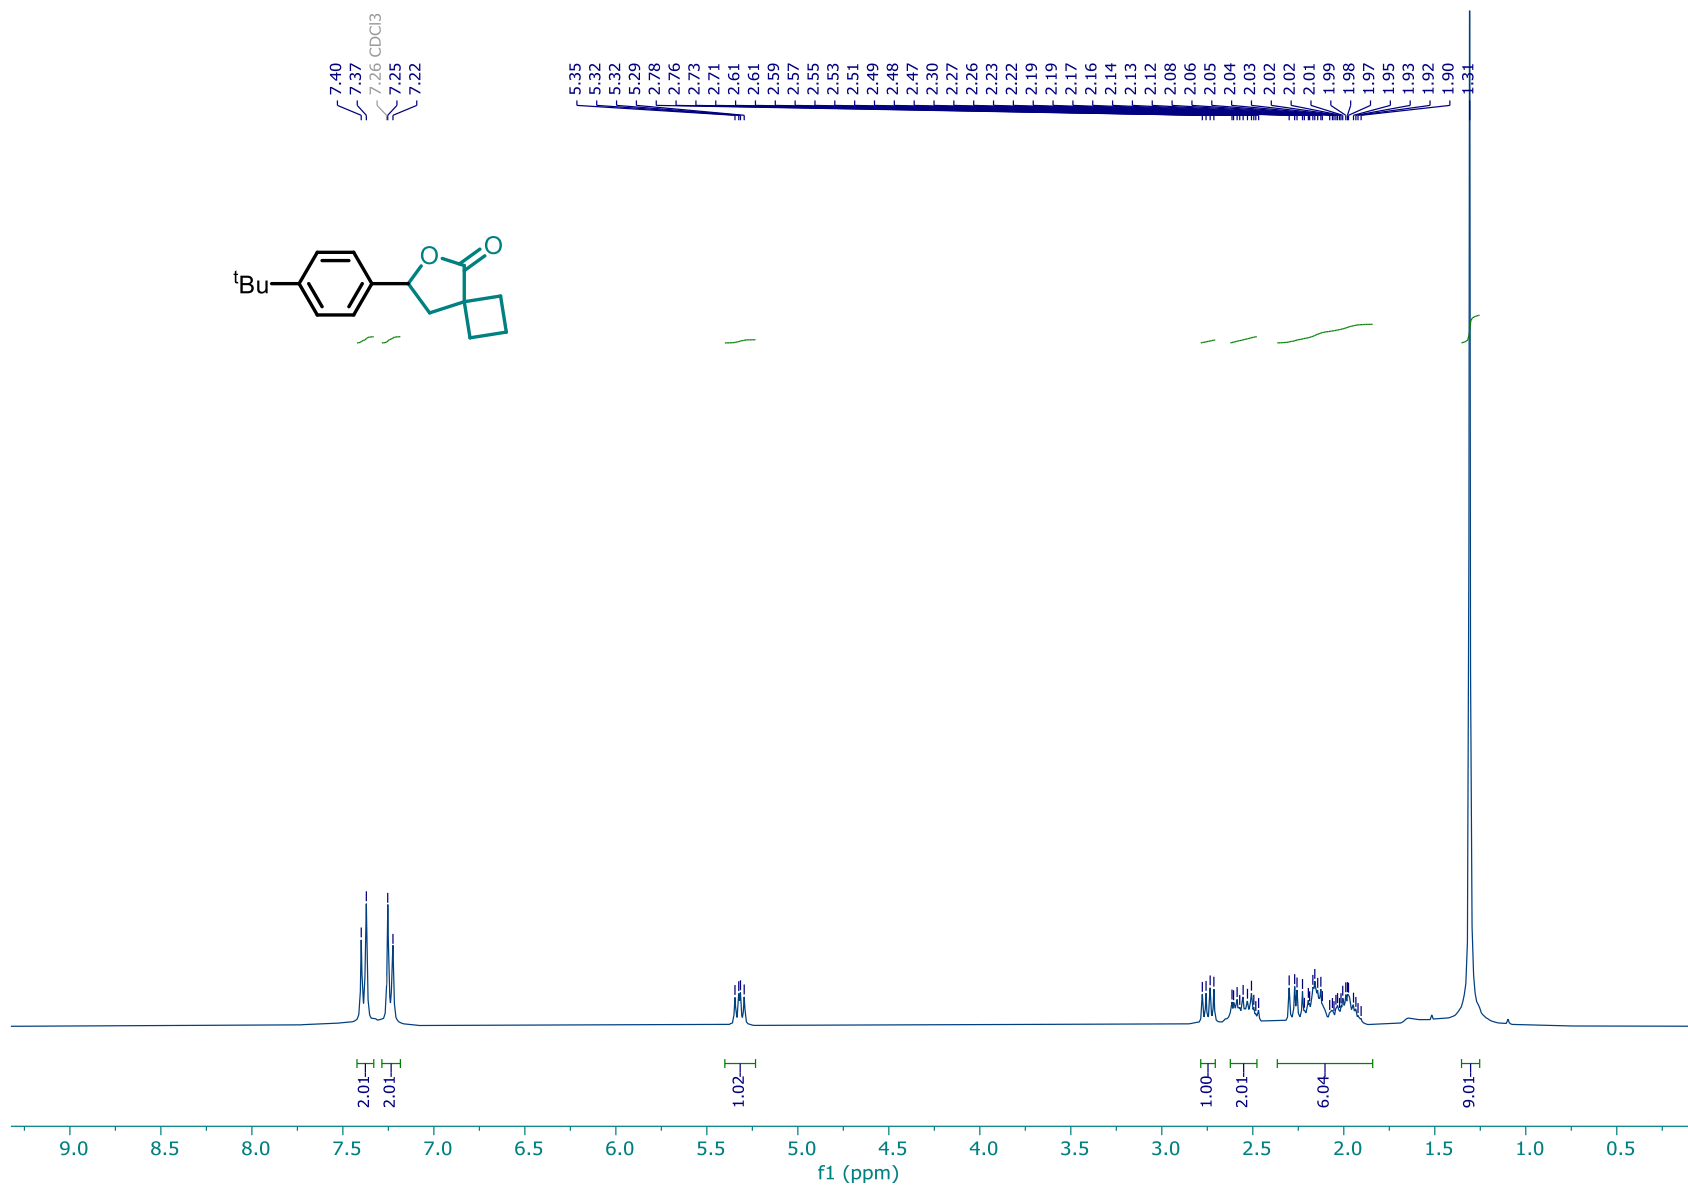

<sup>13</sup>C NMR (75 MHz, CDCl<sub>3</sub>) of **43**

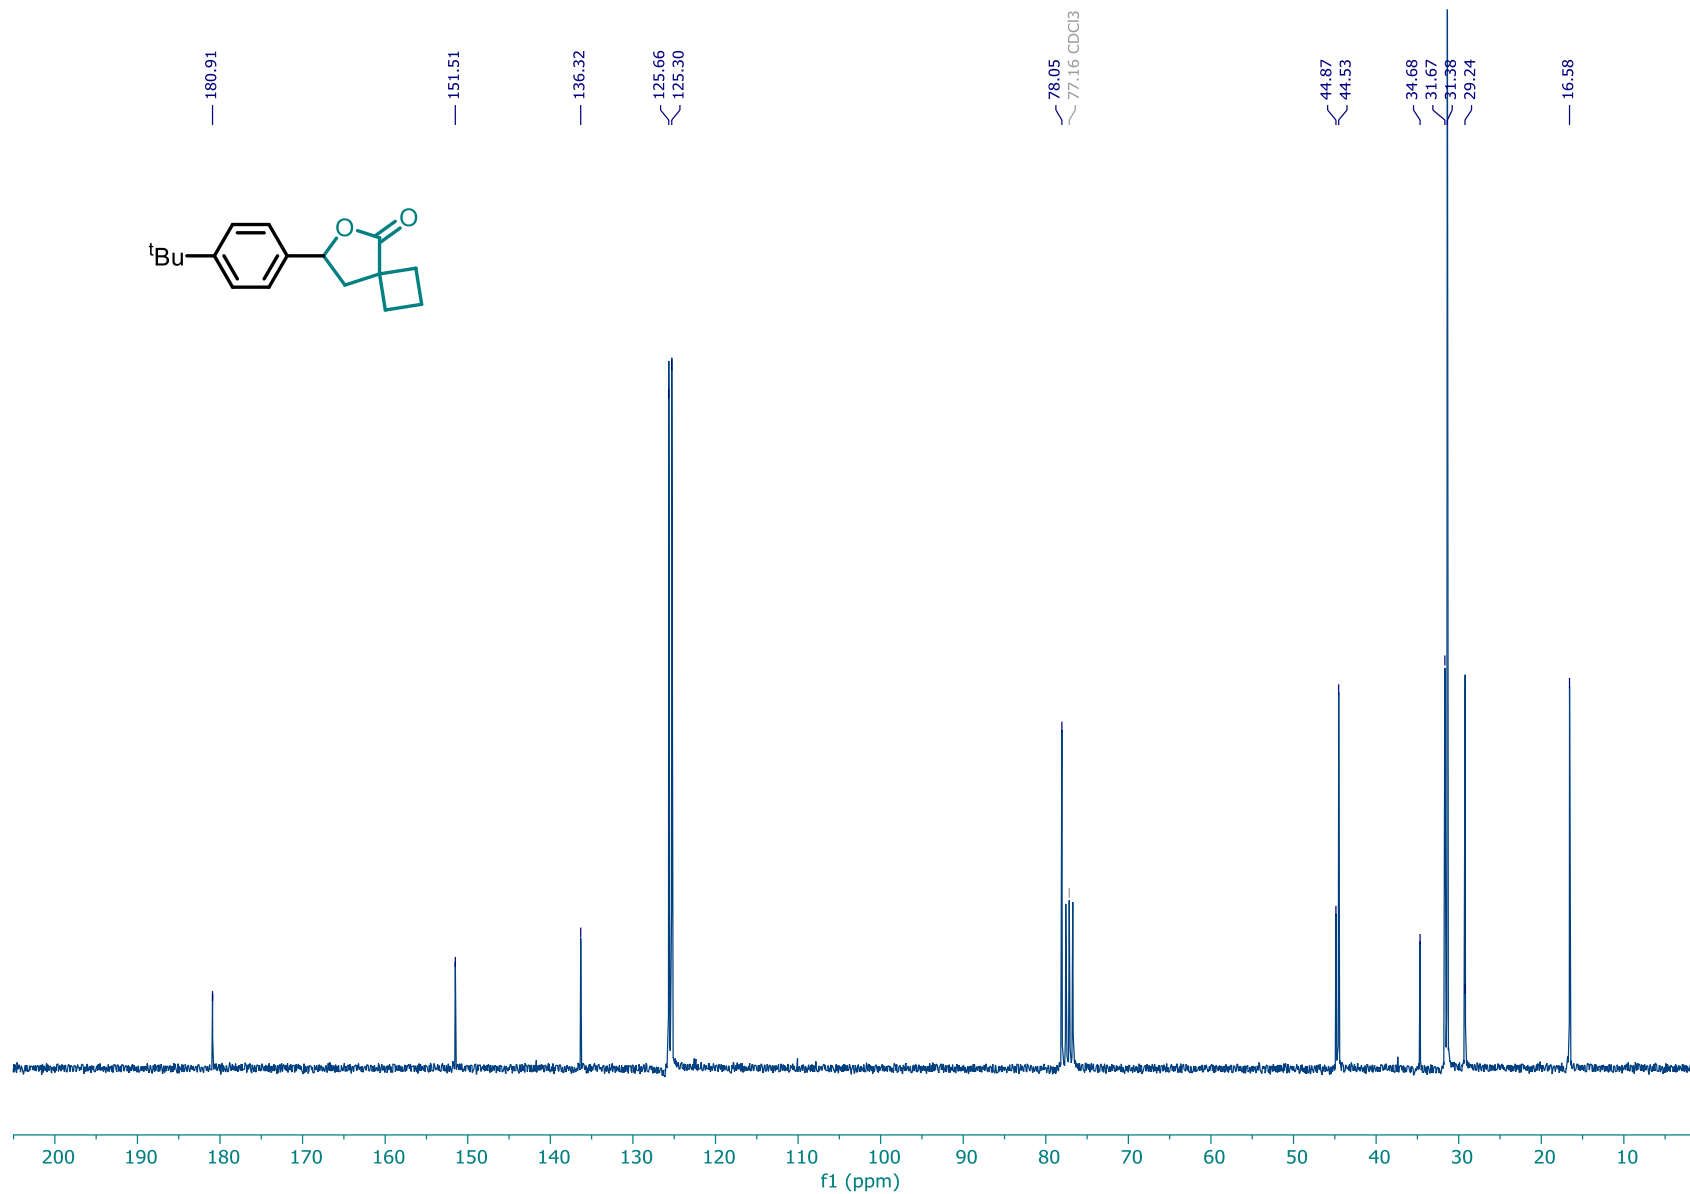



<sup>1</sup>H NMR (300 MHz, CDCl<sub>3</sub>) of **44**

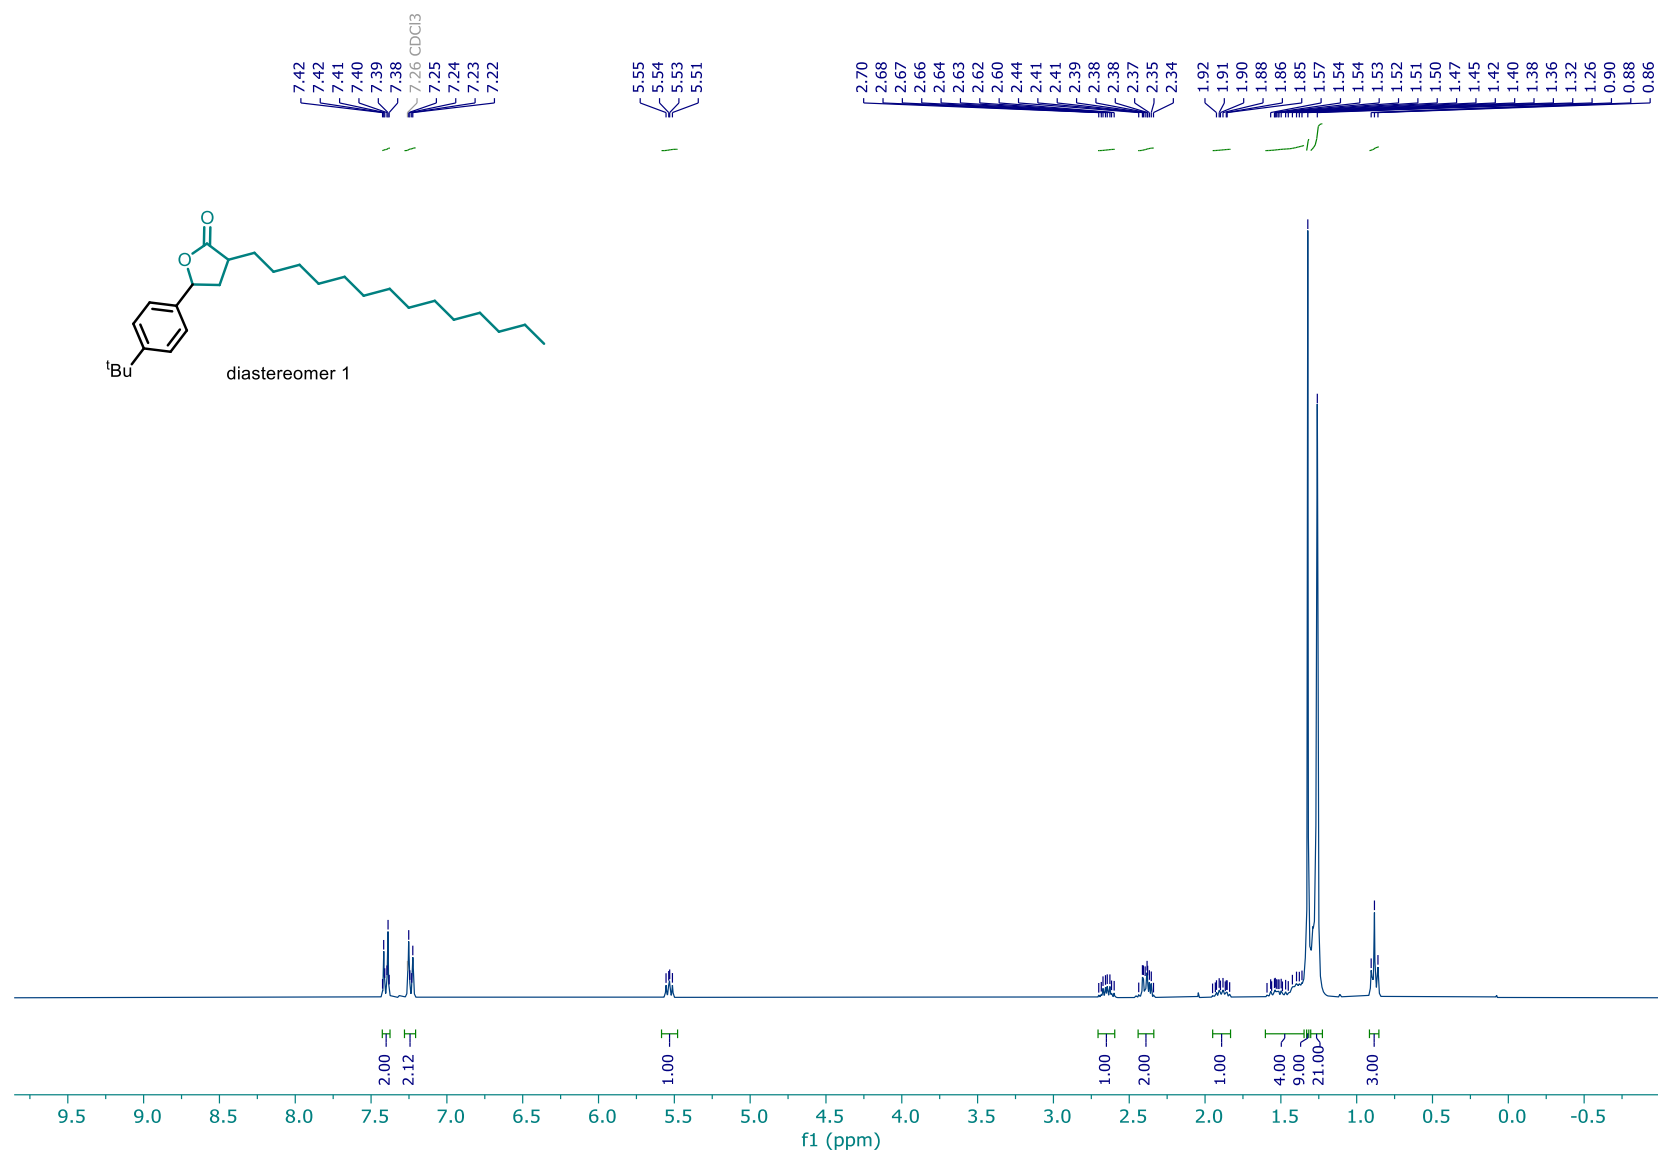

$^{13}\text{C}$  NMR (75 MHz,  $\text{CDCl}_3$ ) of **44**

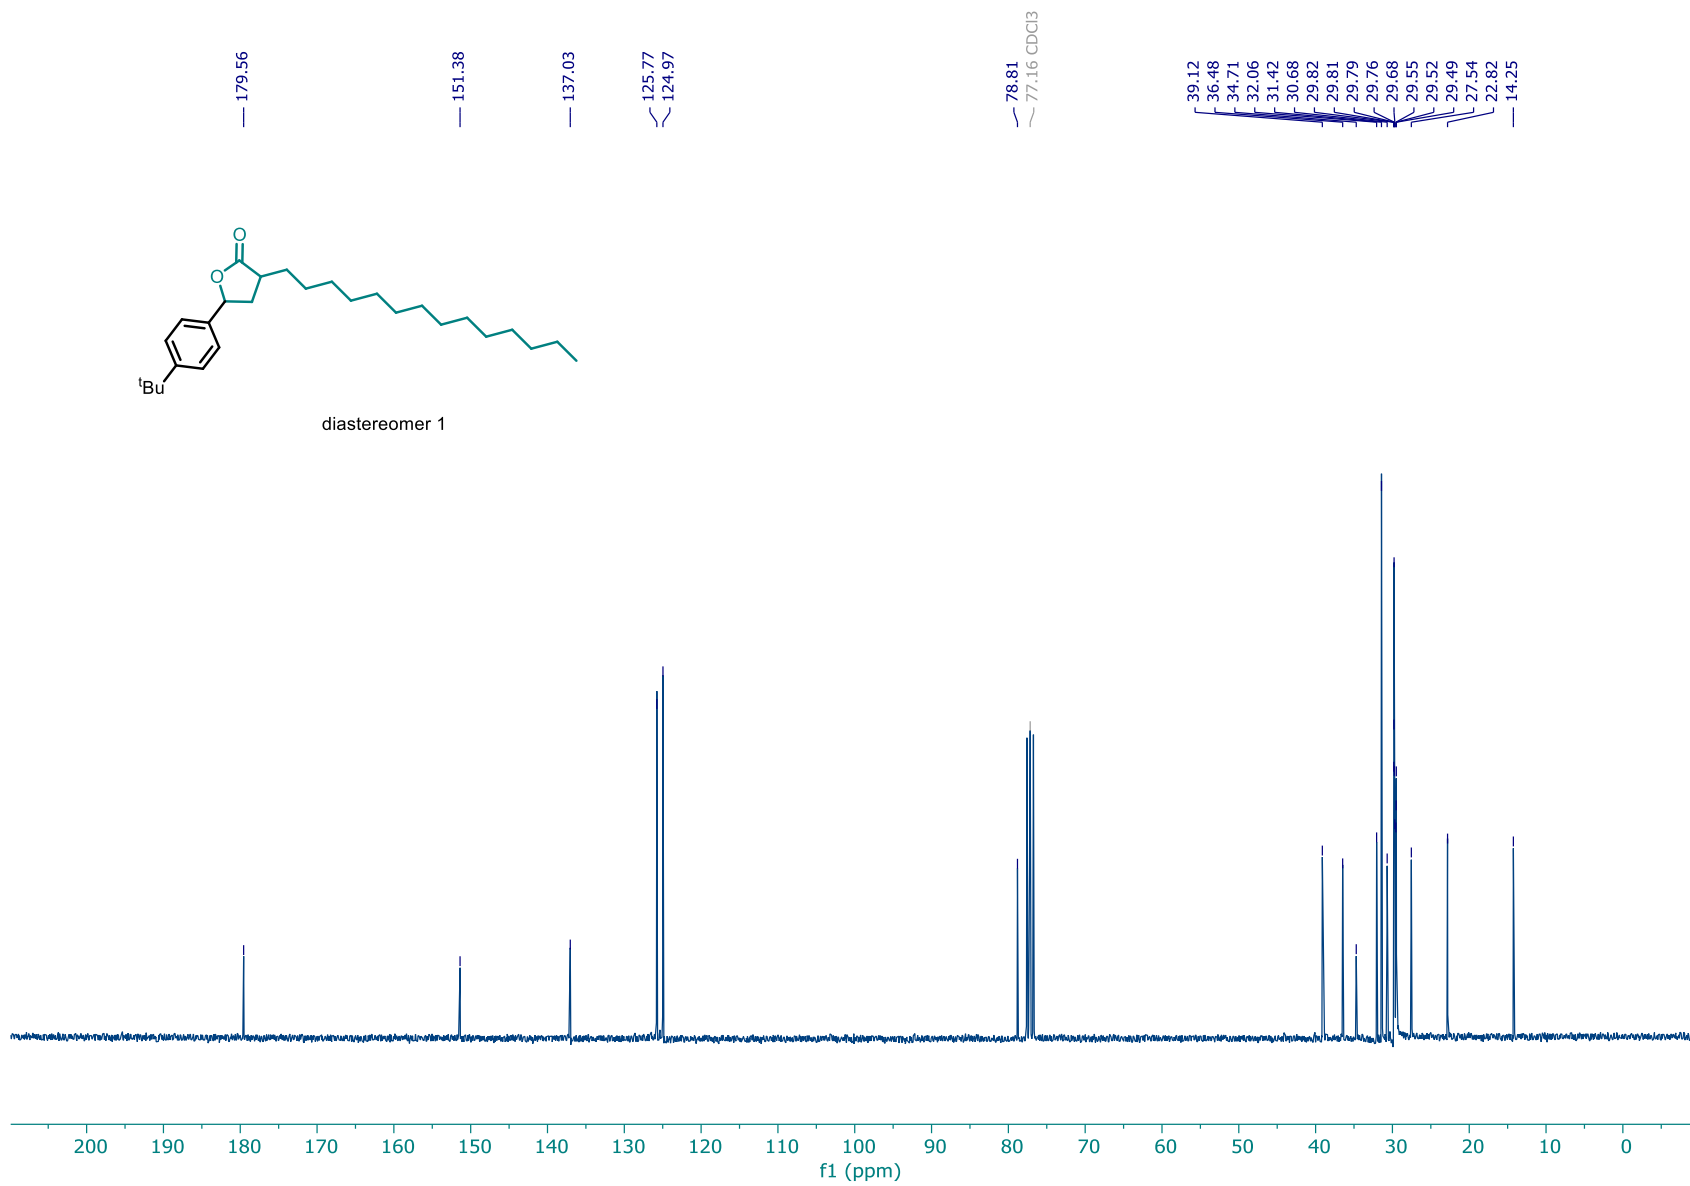

<sup>1</sup>H NMR (300 MHz, CDCl<sub>3</sub>) of **44**

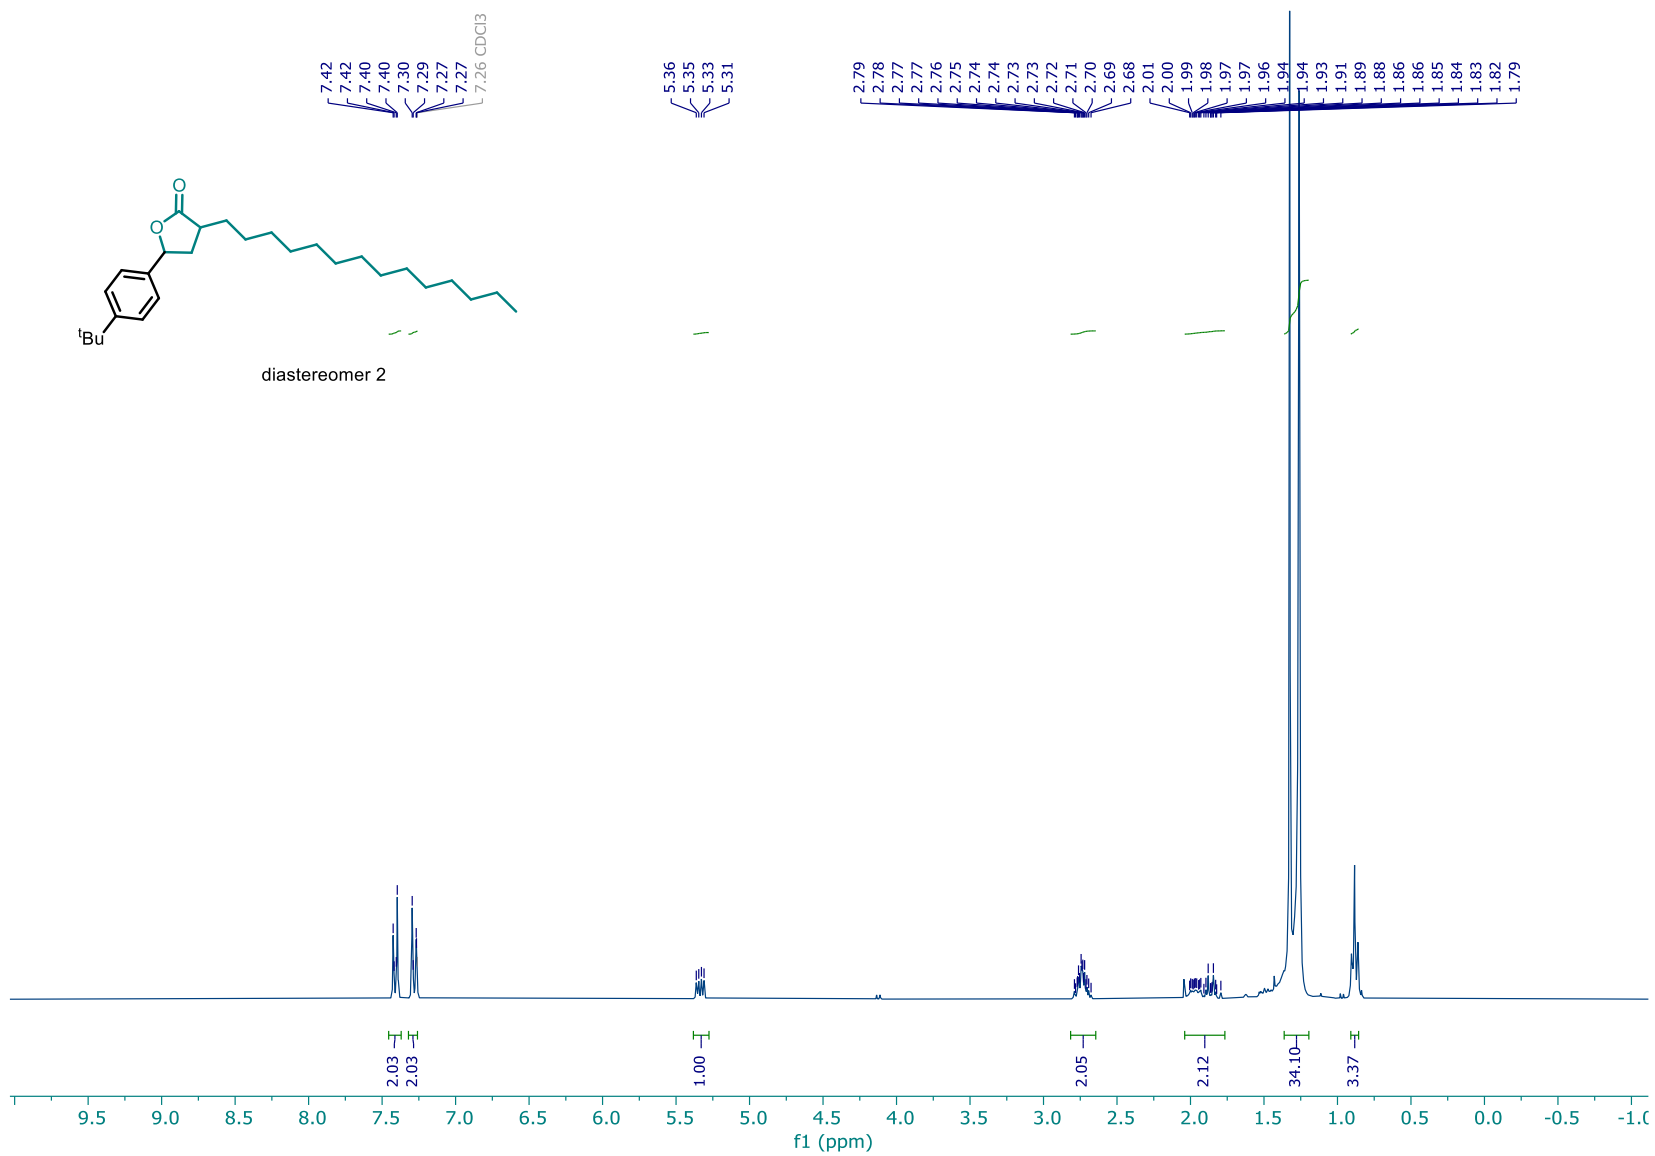

<sup>13</sup>C NMR (75 MHz, CDCl<sub>3</sub>) of **44**

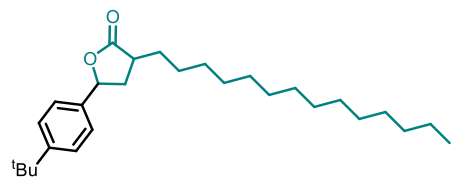

diastereomer 2

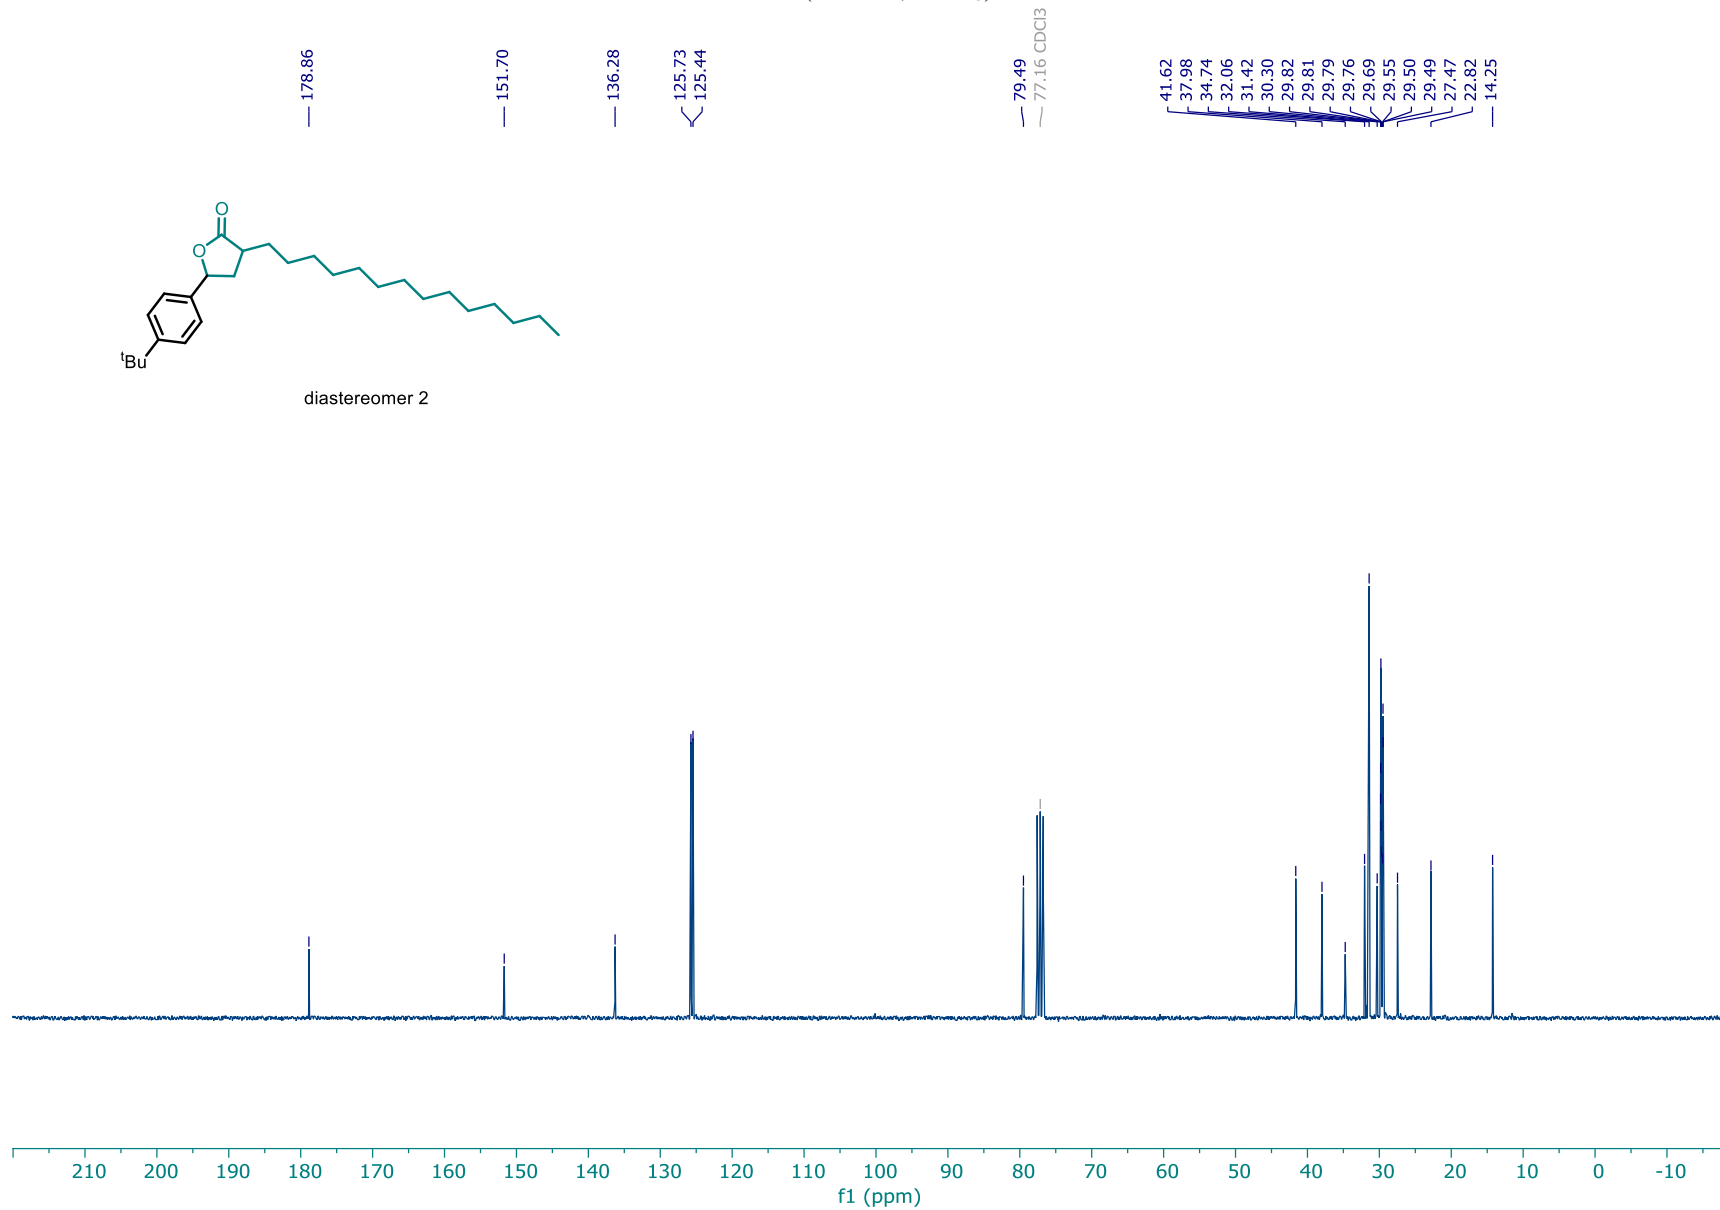

<sup>1</sup>H NMR (300 MHz, CDCl<sub>3</sub>) of **45**

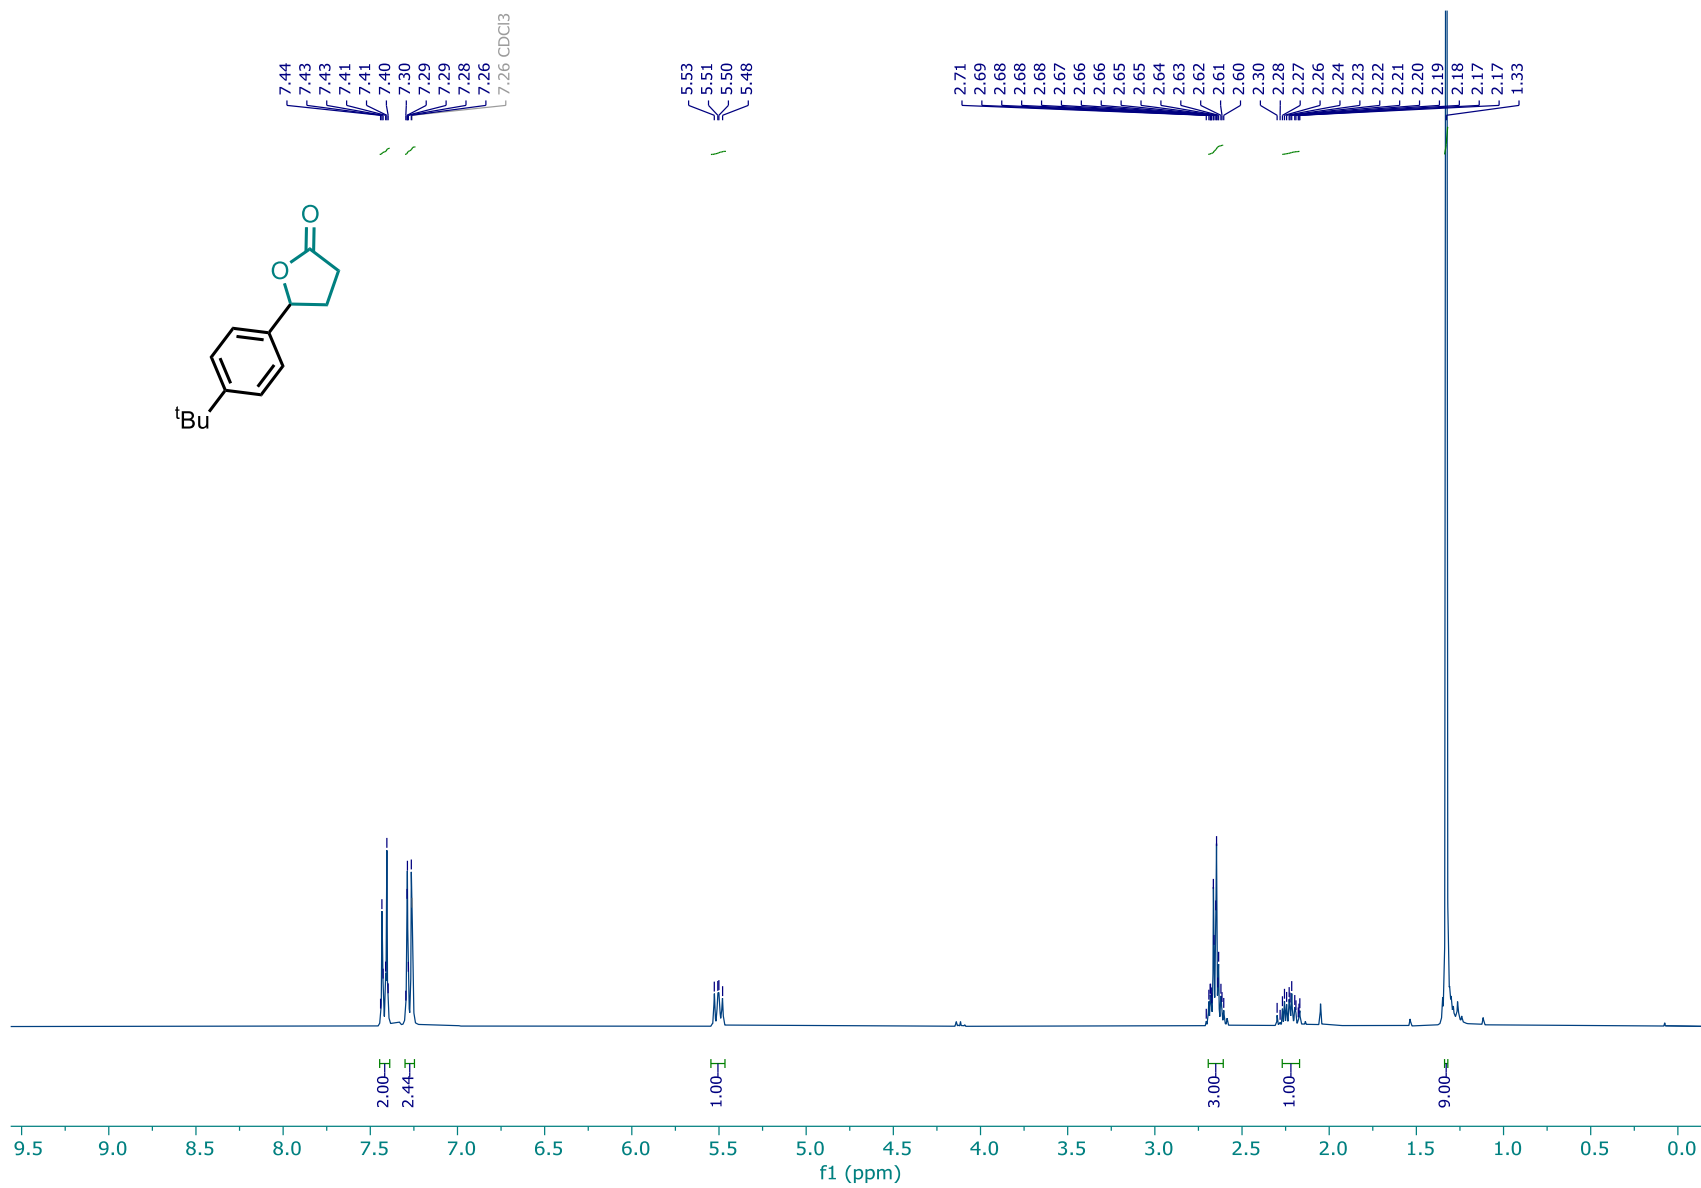

$^{13}\text{C}$  NMR (75 MHz,  $\text{CDCl}_3$ ) of **45**

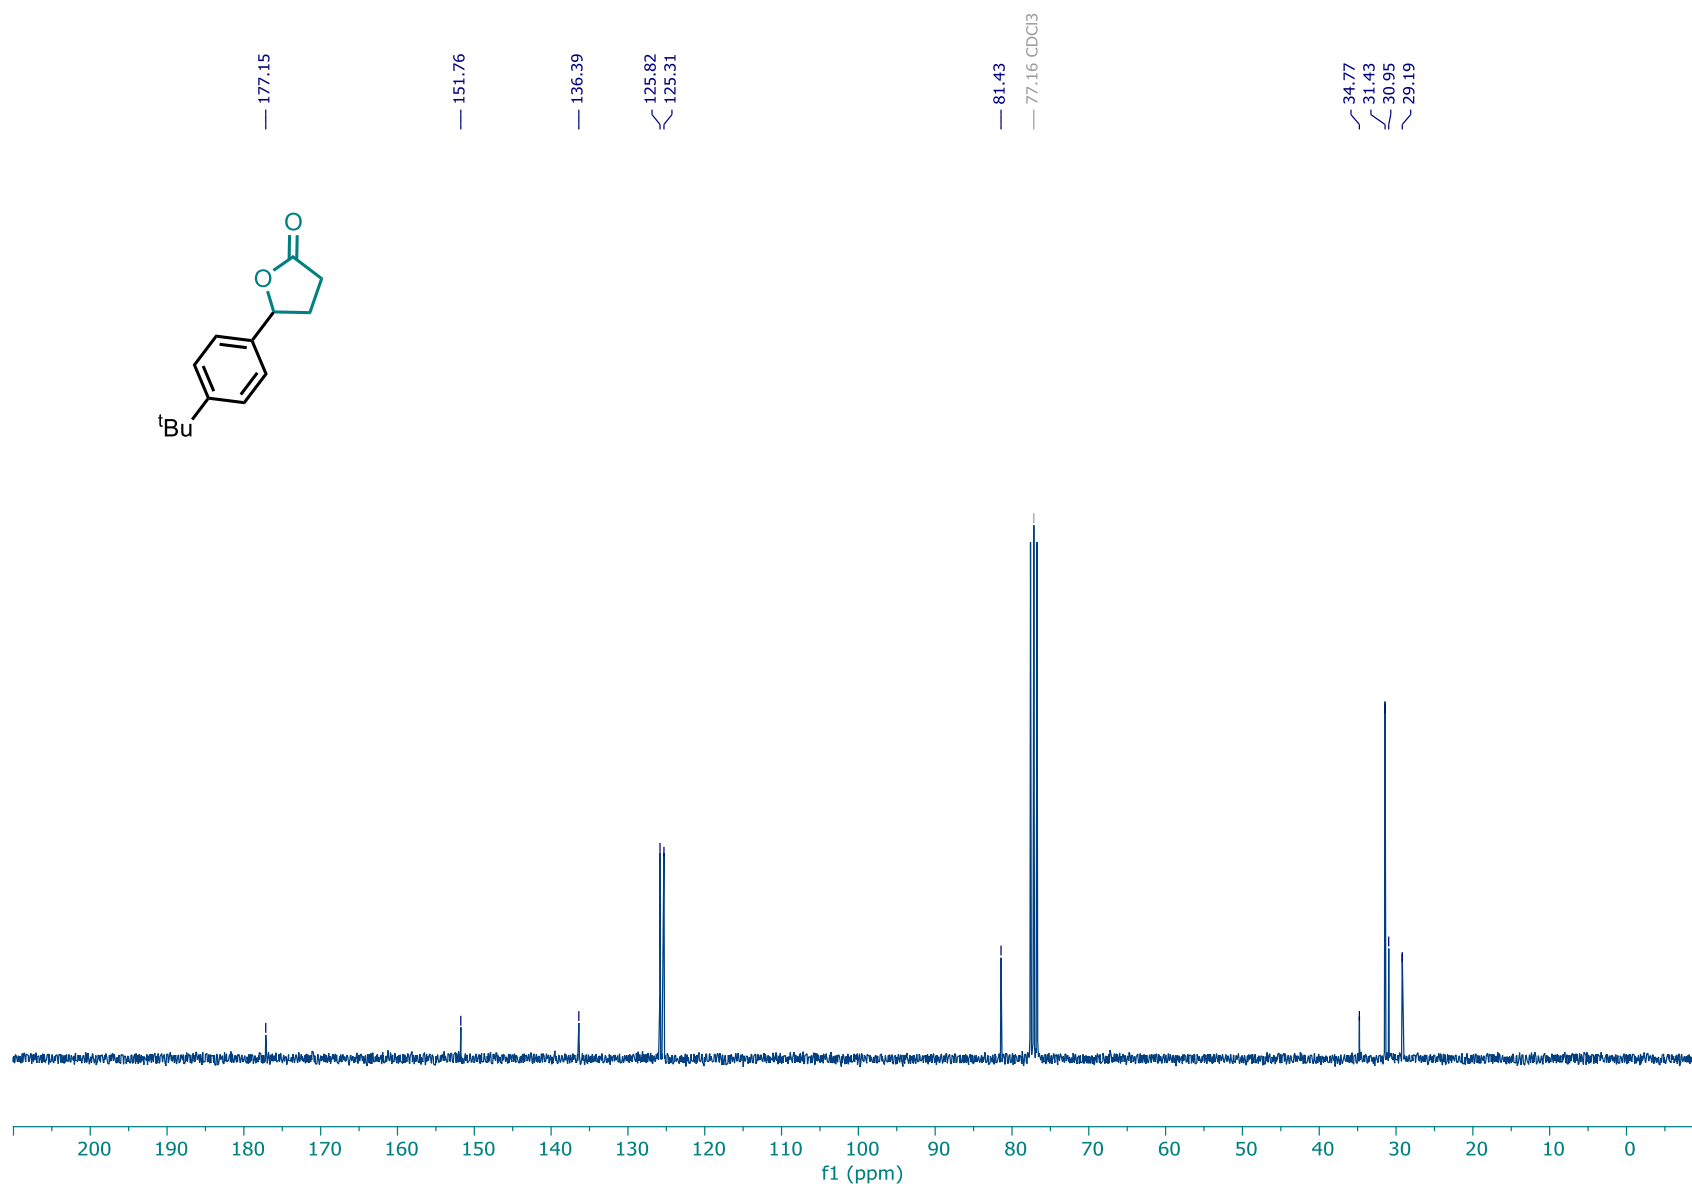

<sup>1</sup>H NMR (400 MHz, CDCl<sub>3</sub>) of 2

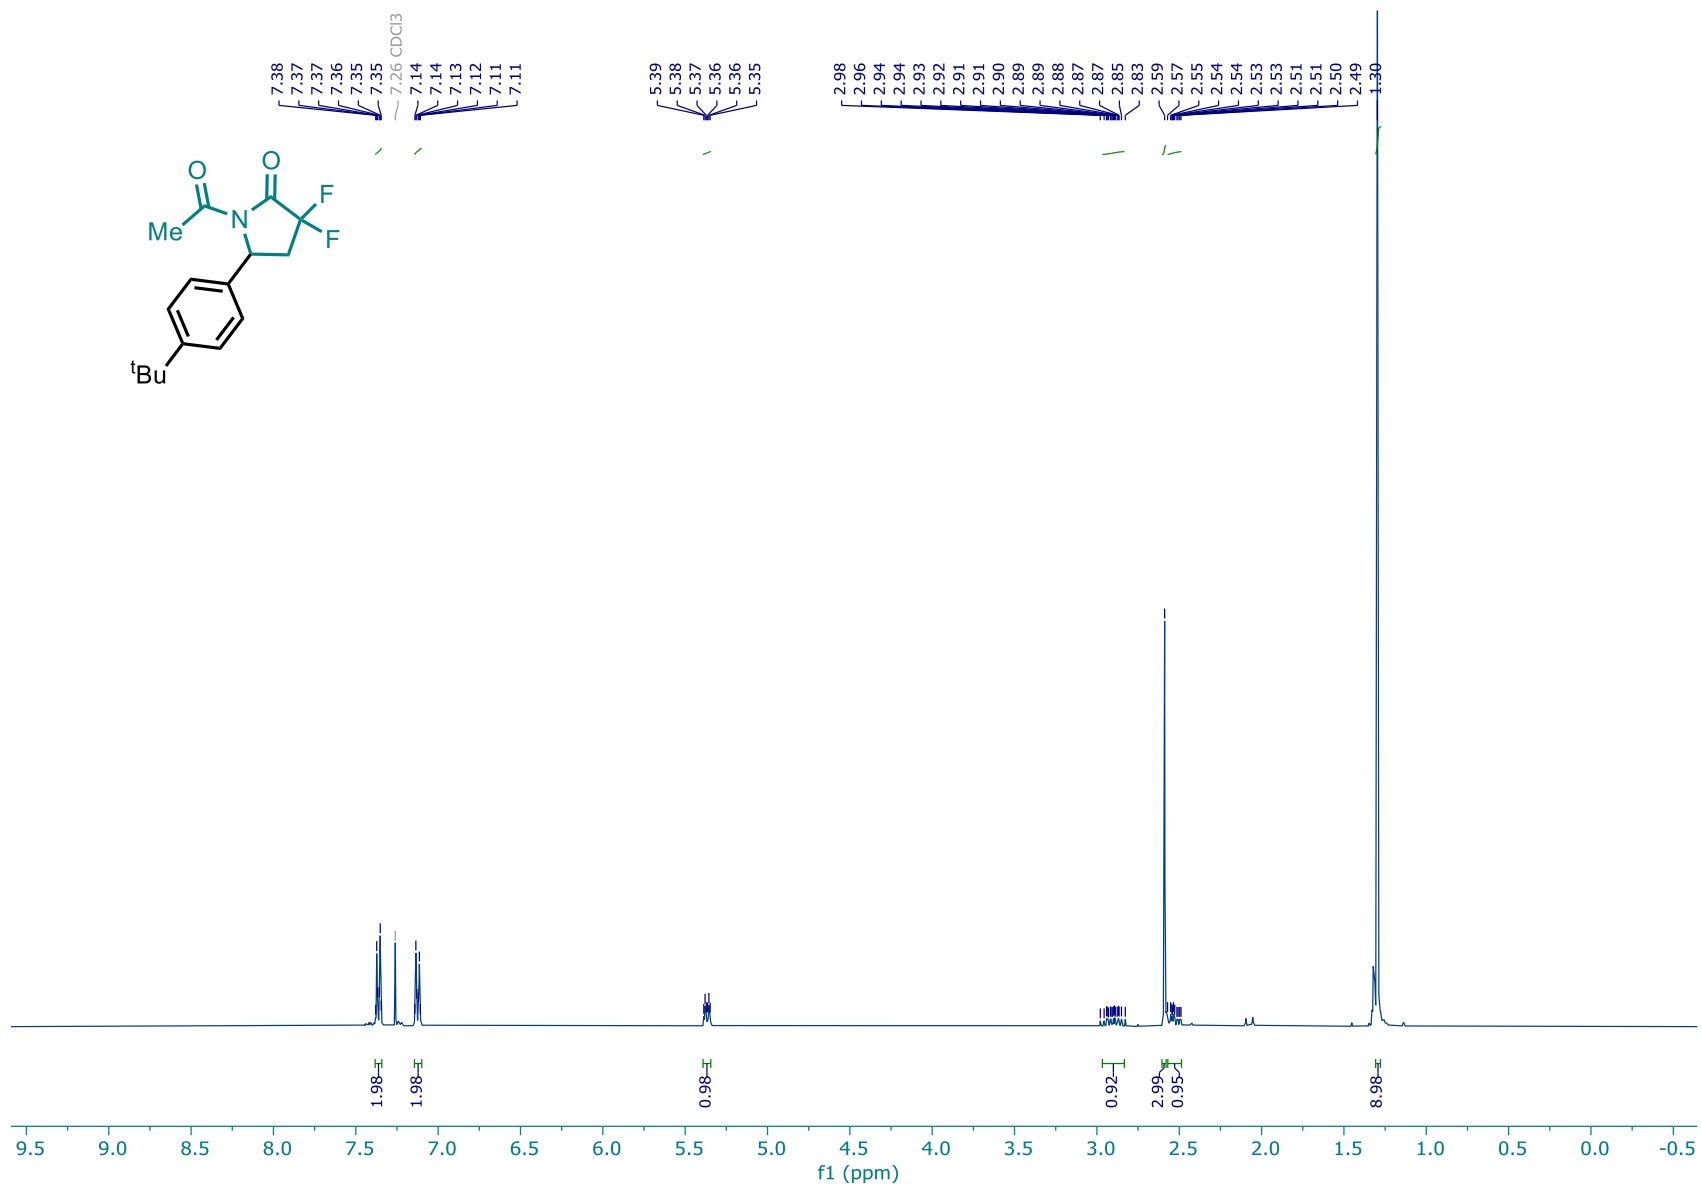

<sup>13</sup>C NMR (101 MHz, CDCl<sub>3</sub>) of **2**

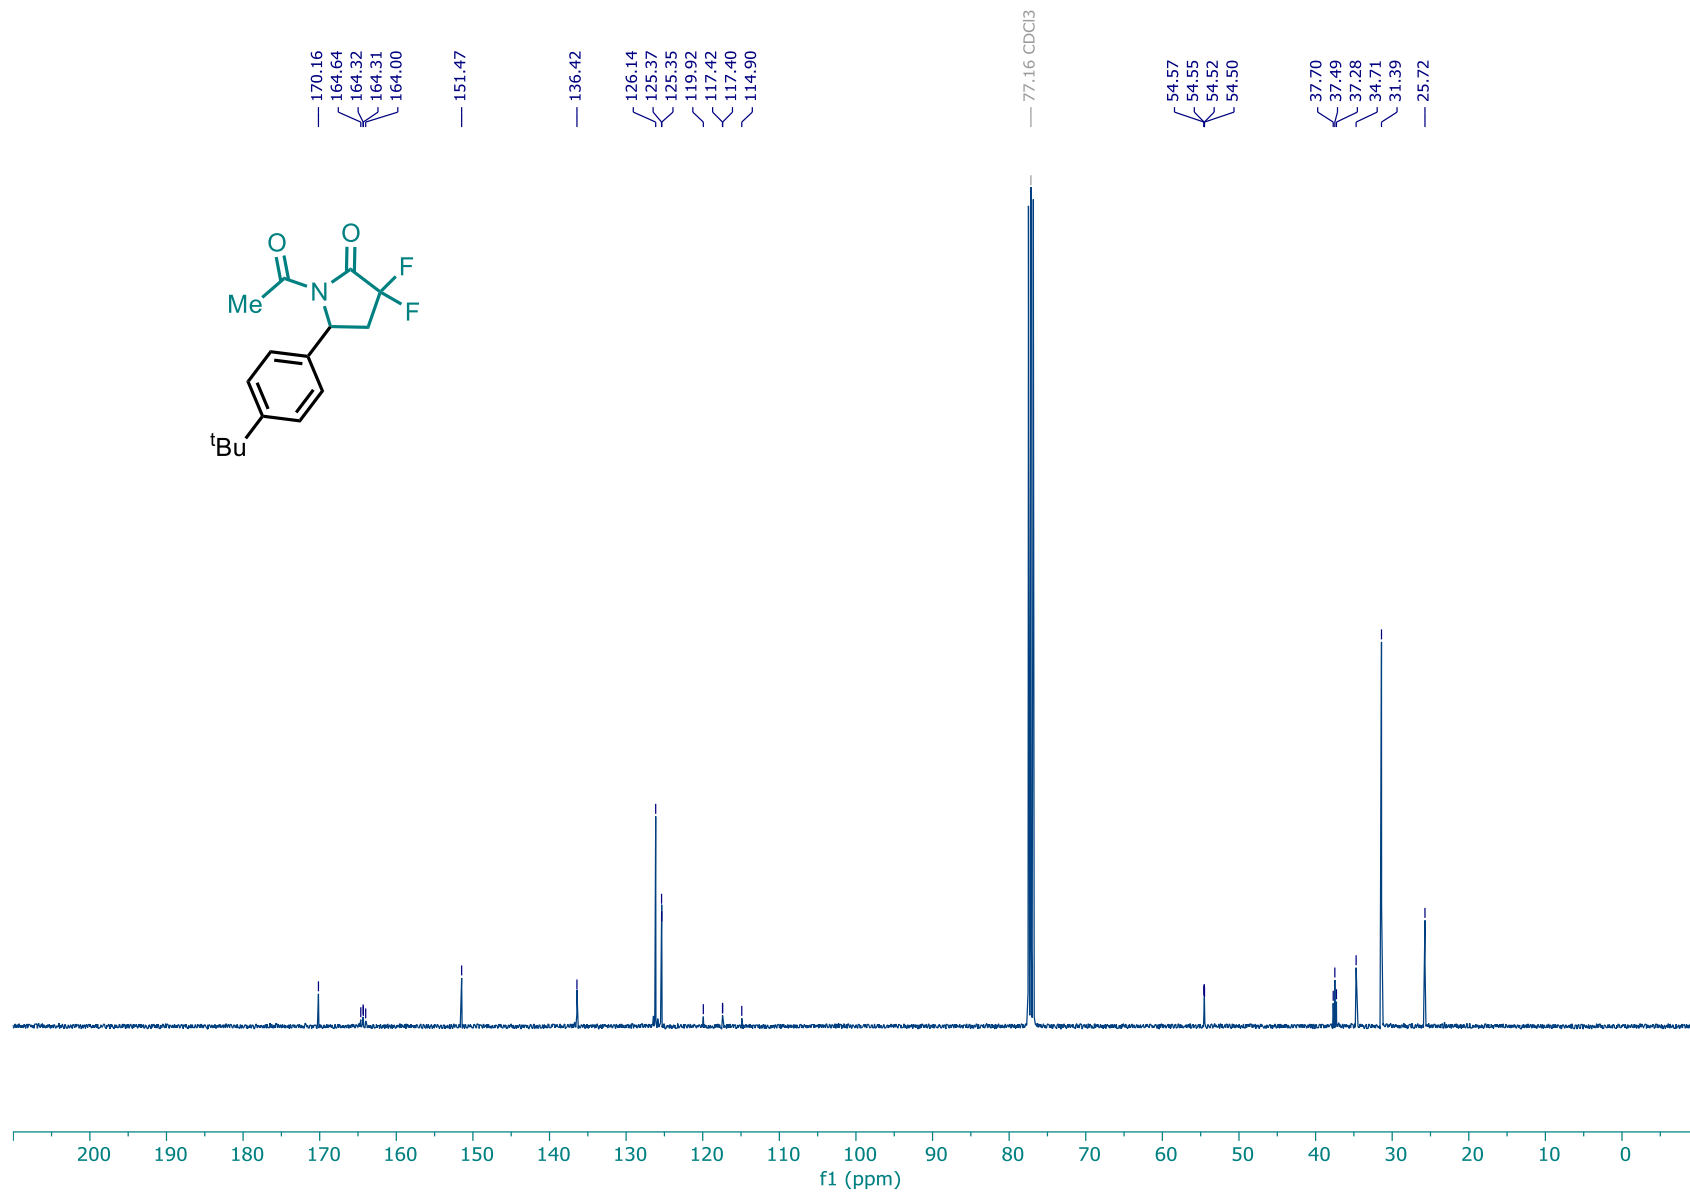



$^{19}\text{F}$  NMR (376 MHz,  $\text{CDCl}_3$ ) of **2**

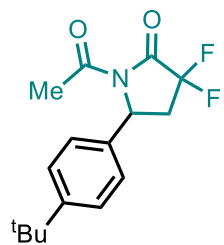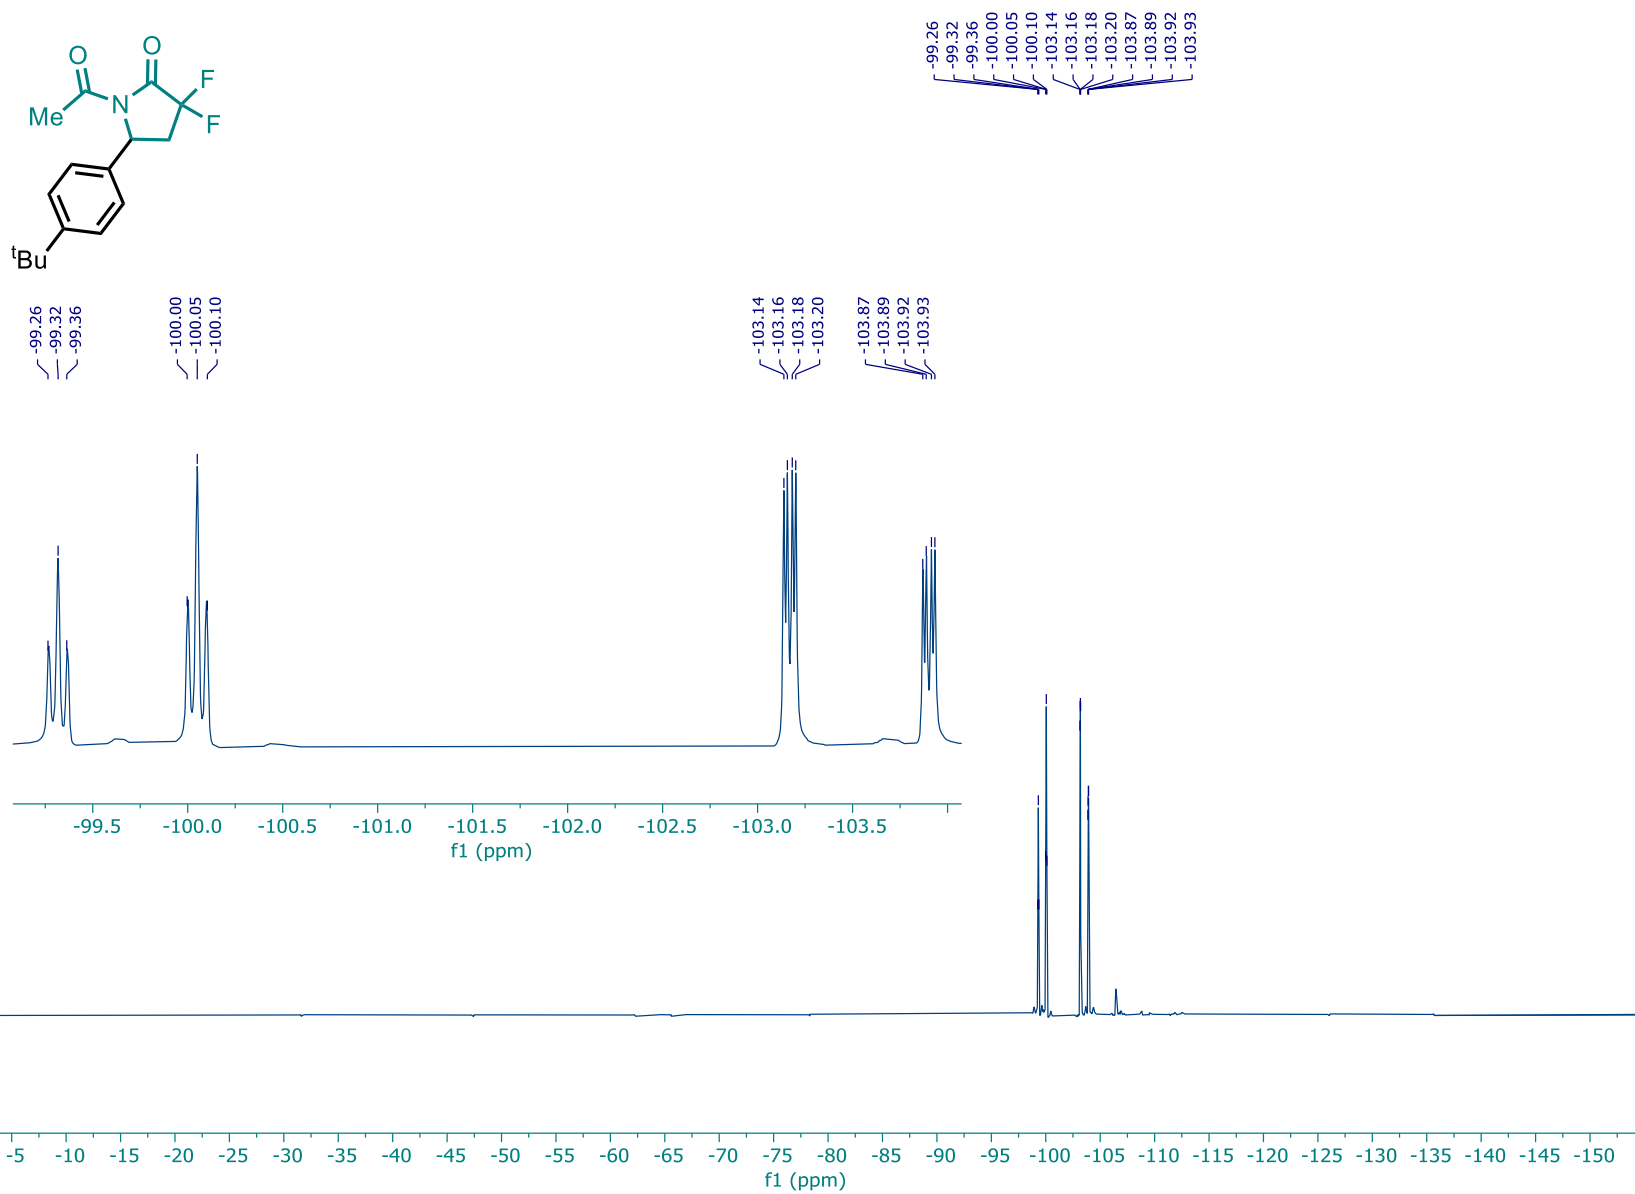

$^1\text{H}$  NMR (400 MHz,  $\text{CDCl}_3$ ) of **46**

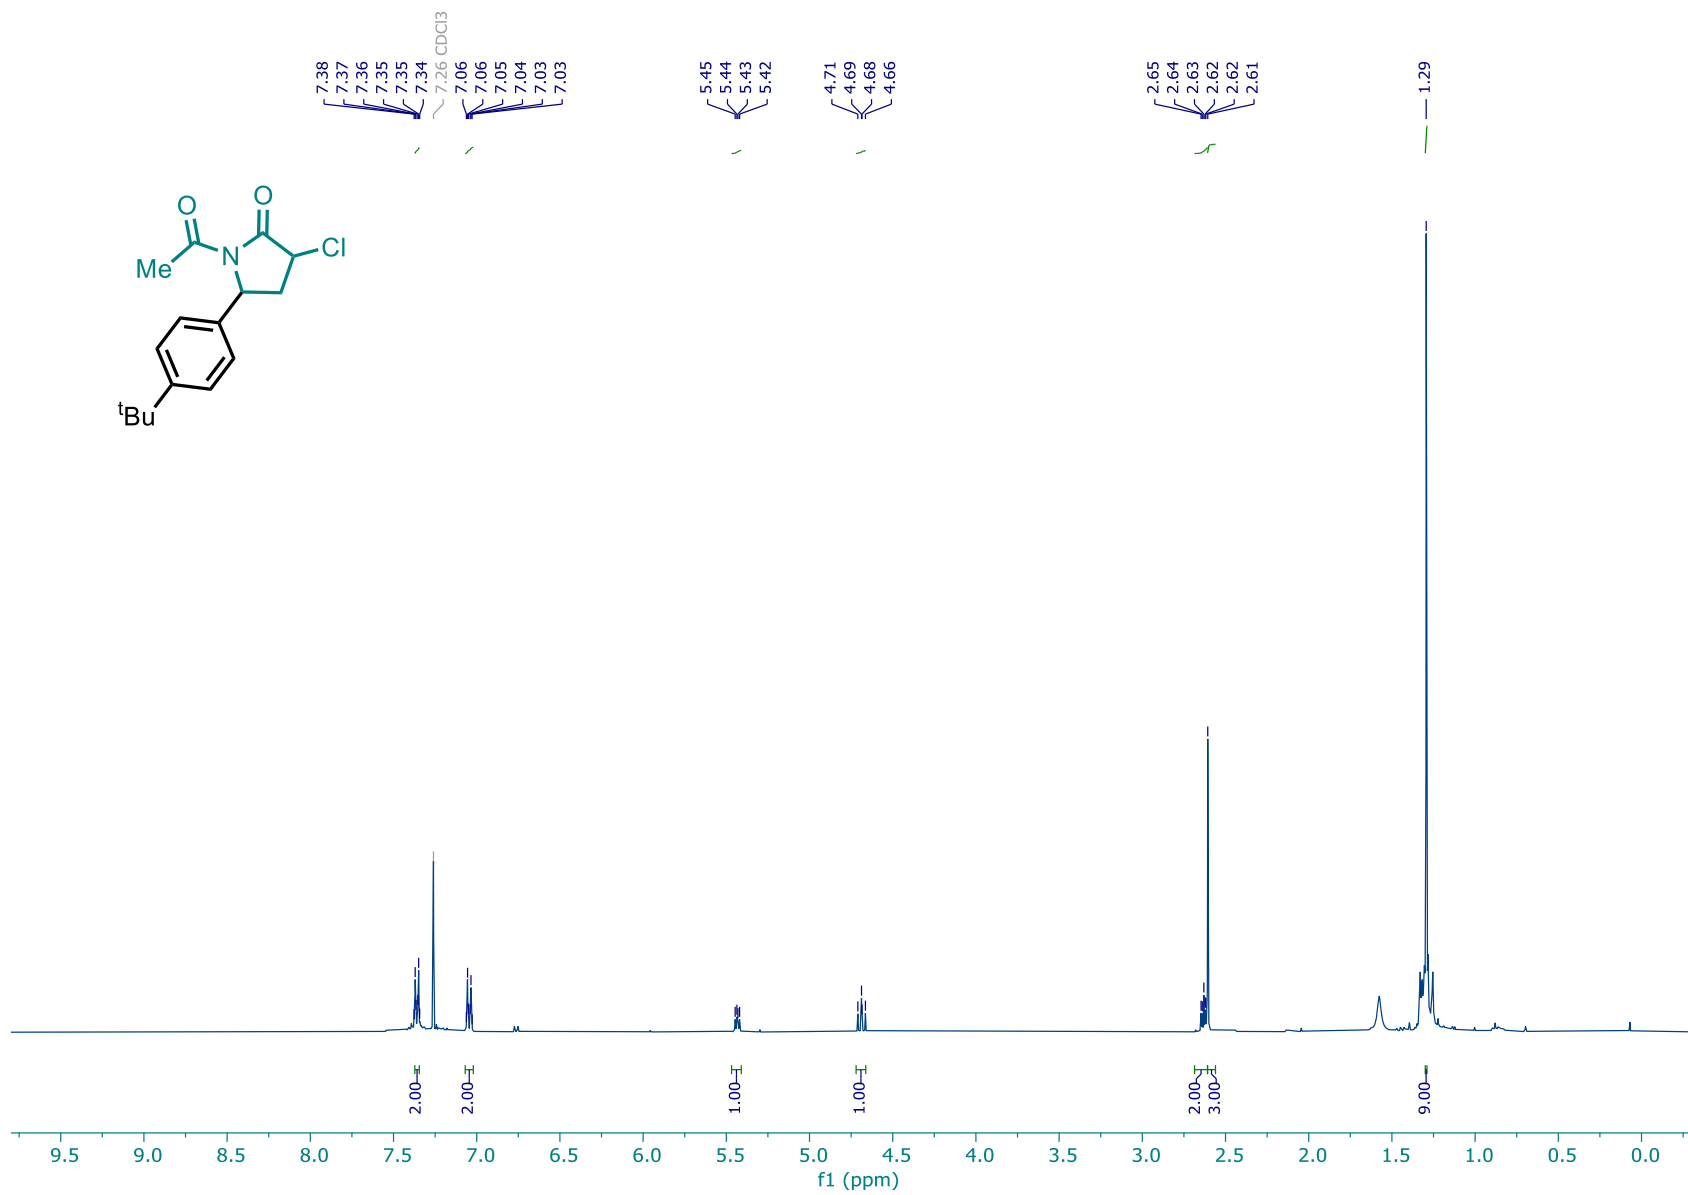

<sup>13</sup>C NMR (101 MHz, CDCl<sub>3</sub>) of **46**

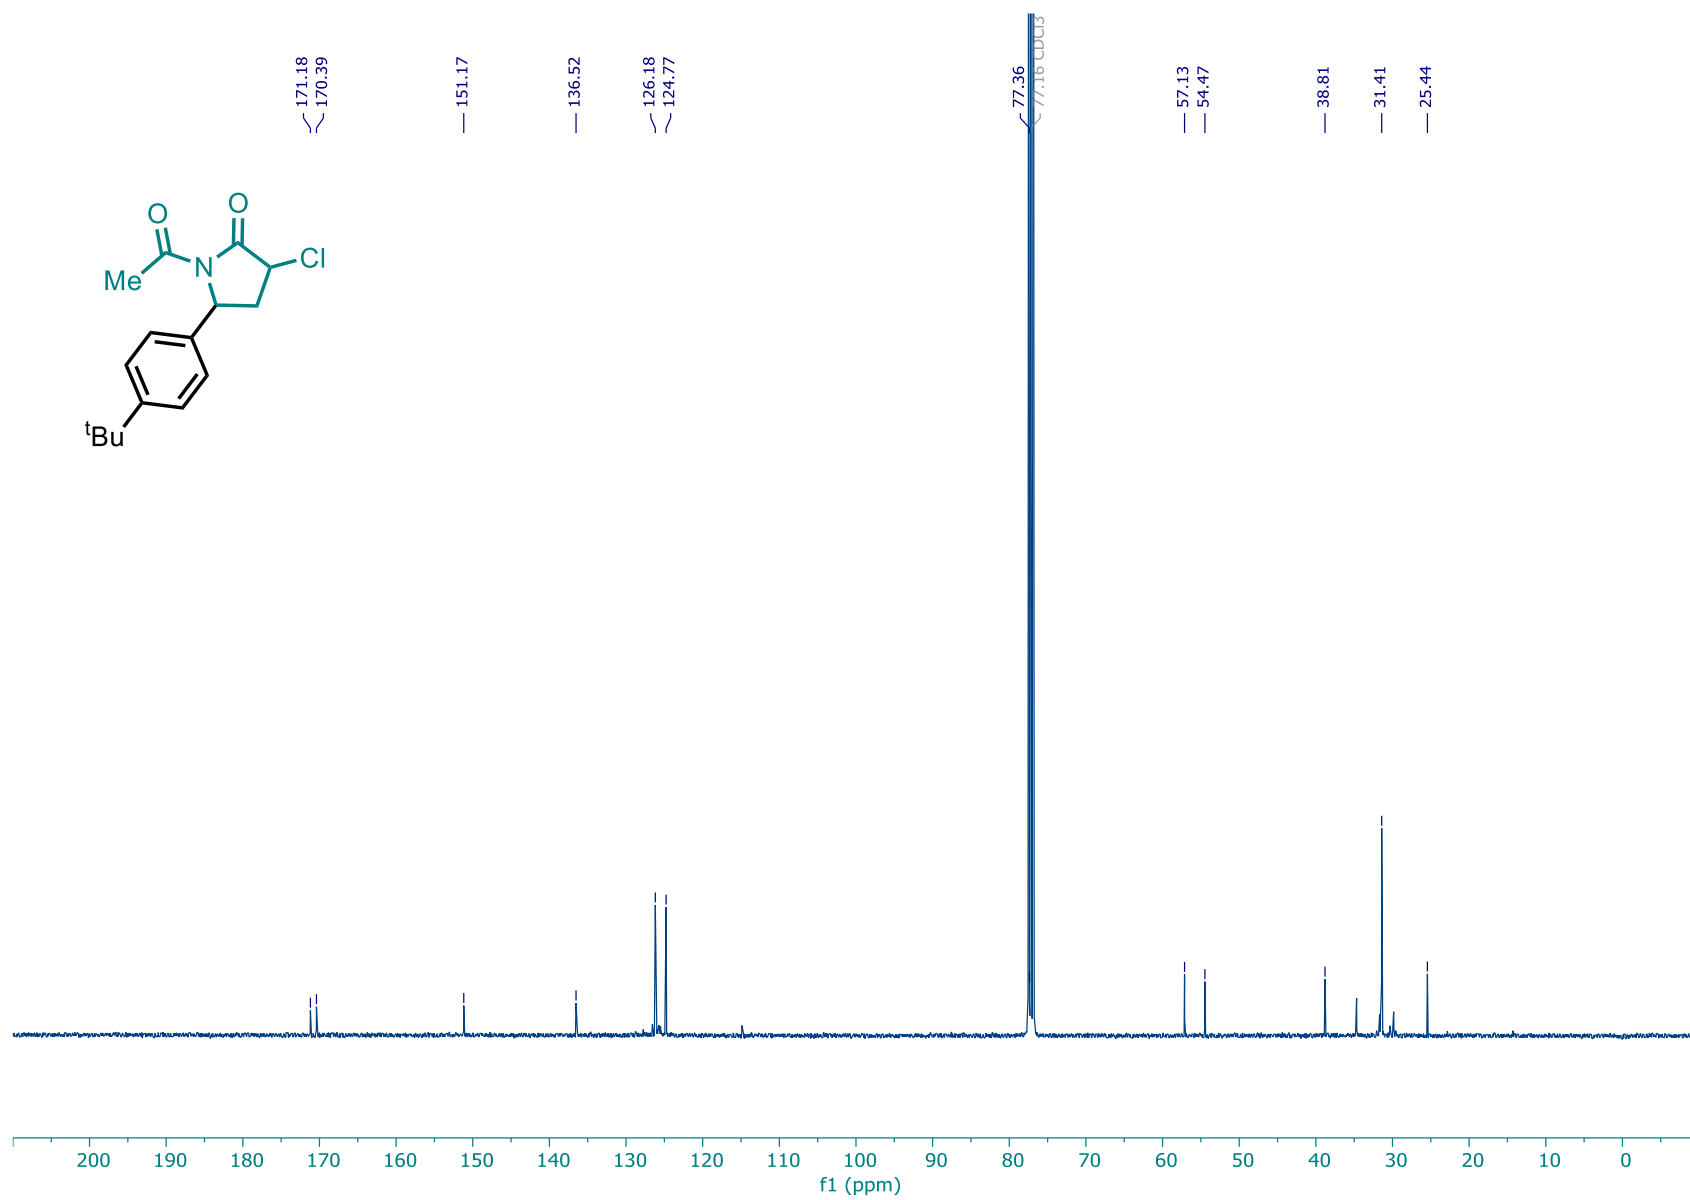

<sup>1</sup>H NMR (300 MHz, CDCl<sub>3</sub>) of **47**

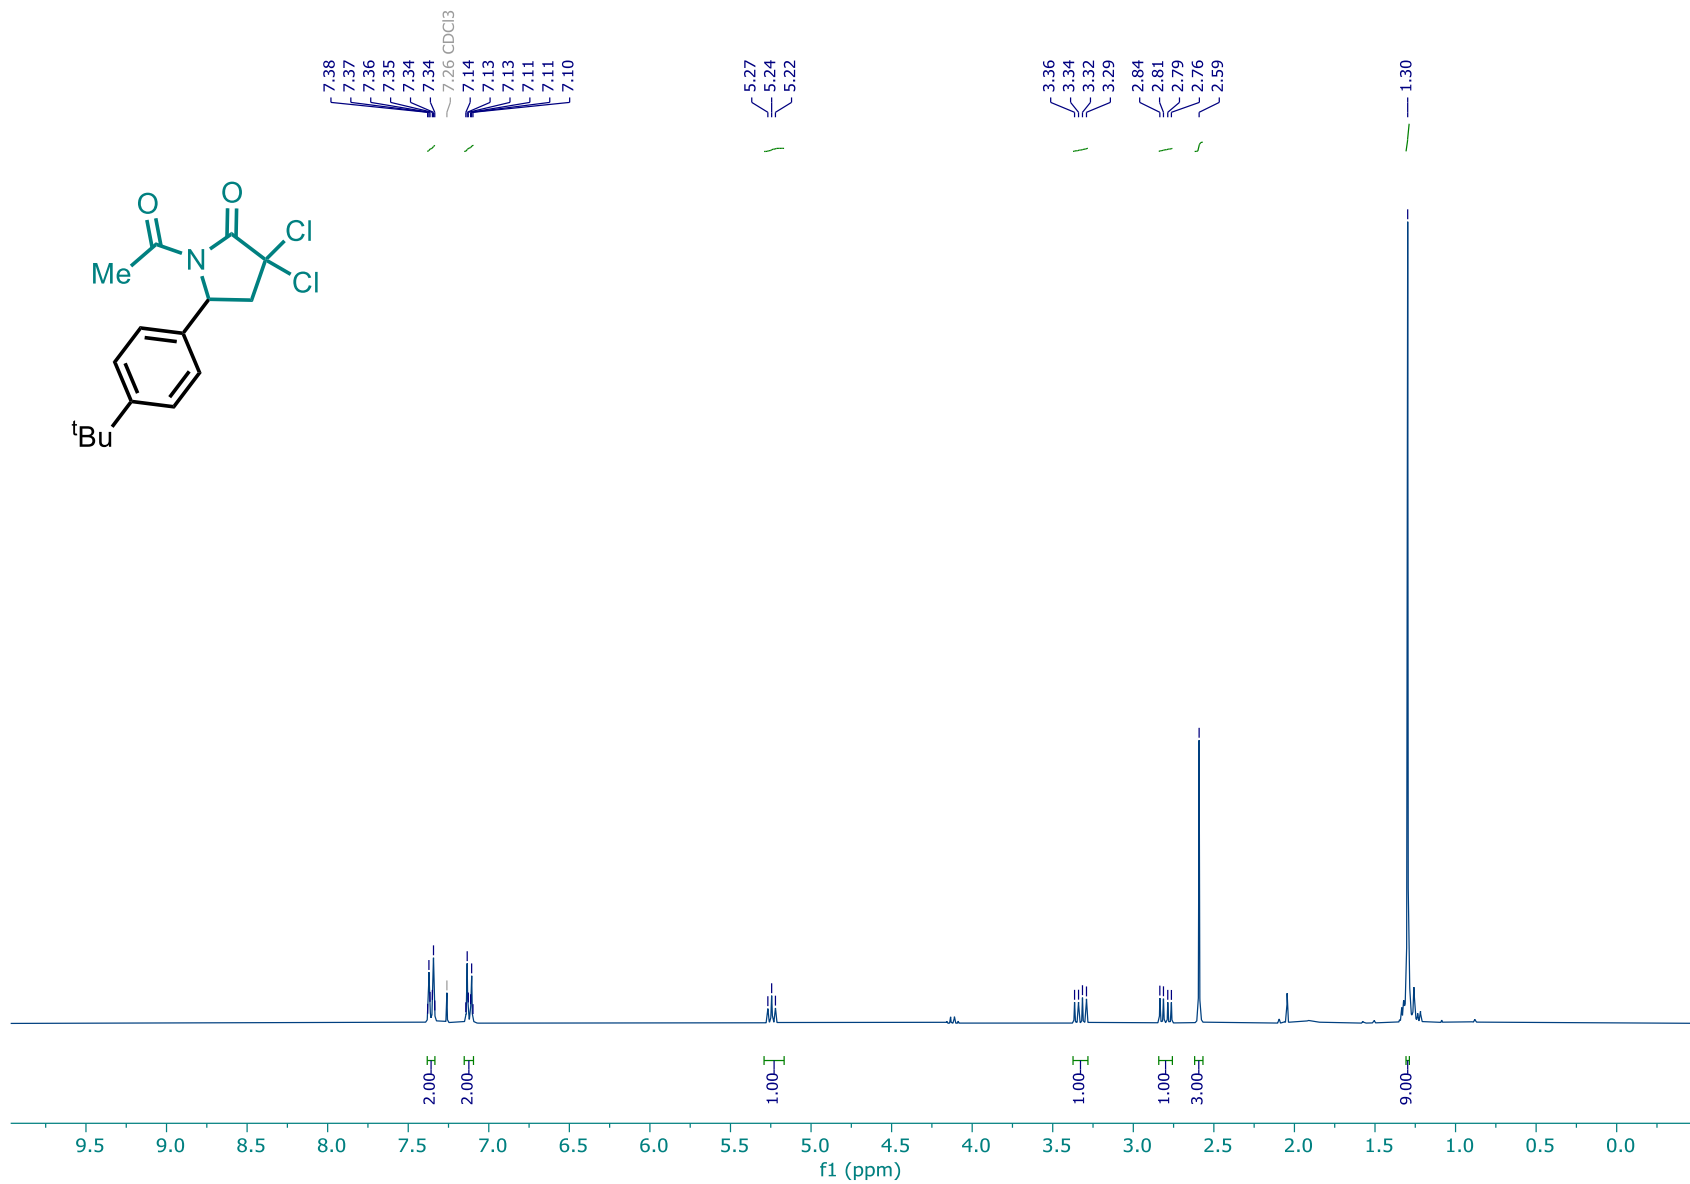

<sup>13</sup>C NMR (75 MHz, CDCl<sub>3</sub>) of **47**

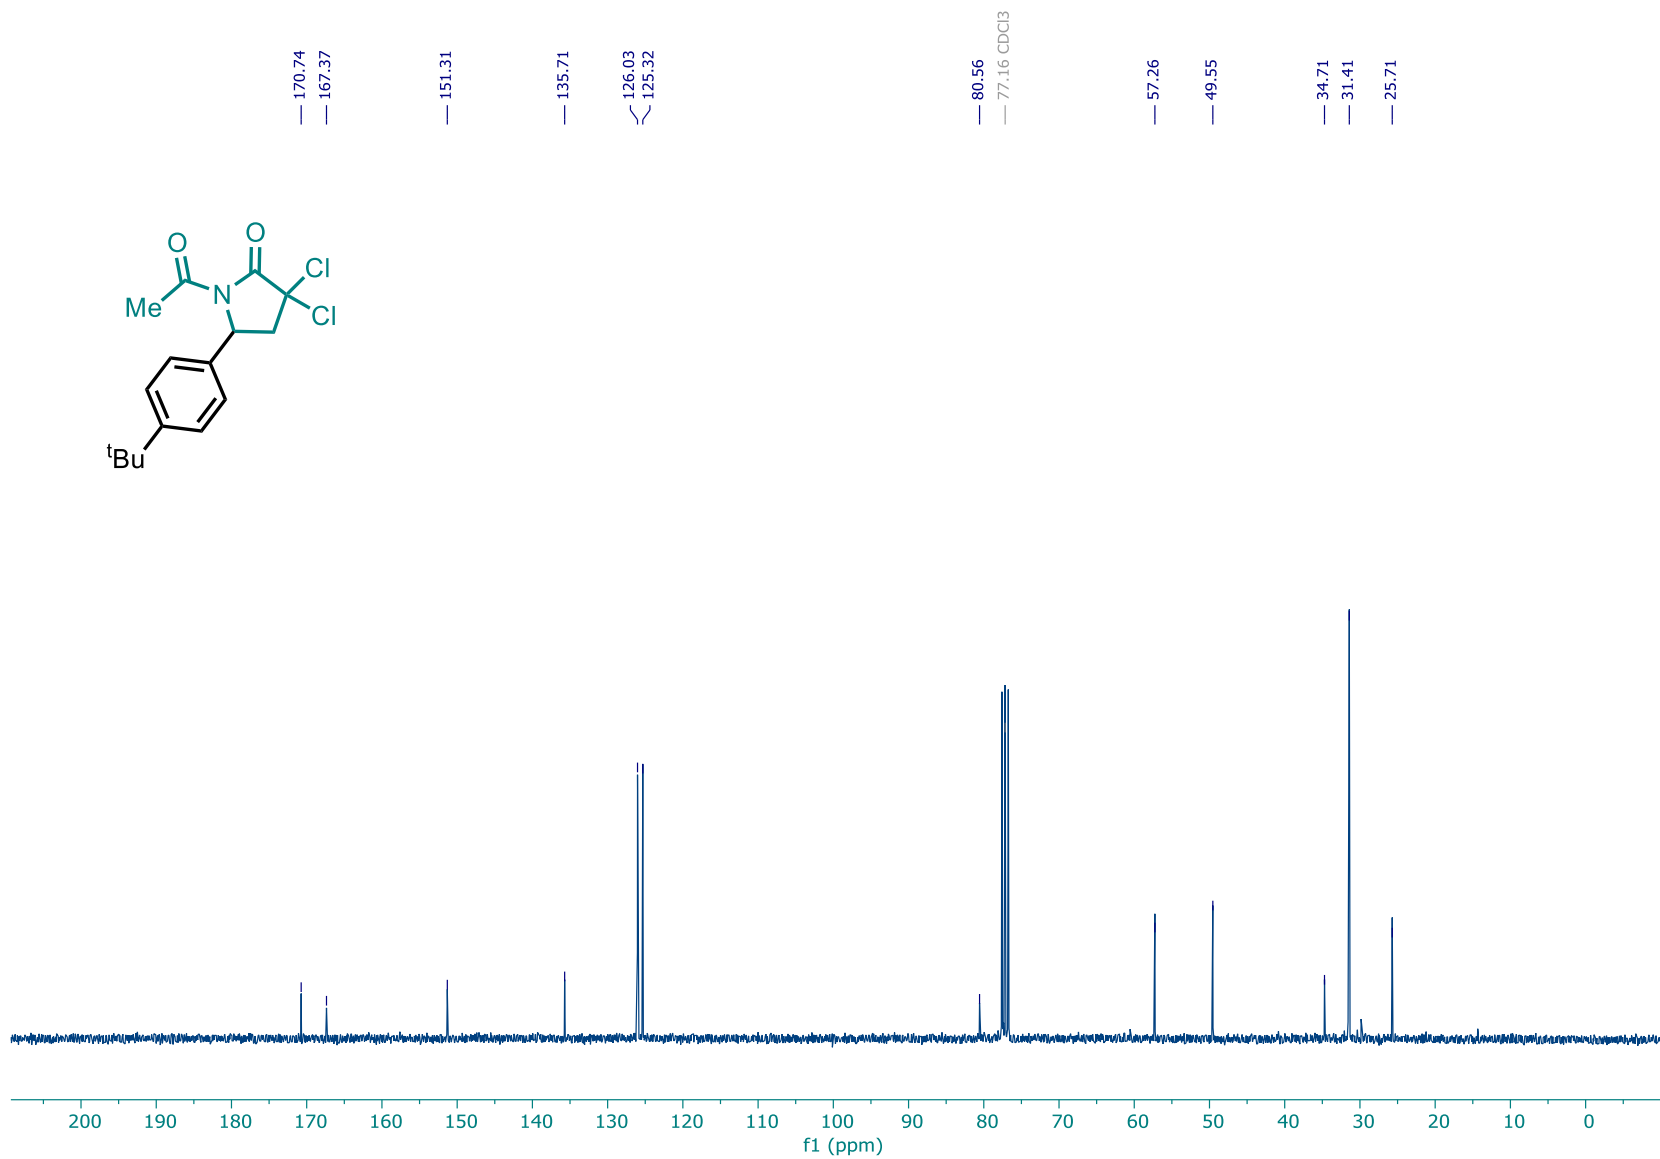

$^1\text{H}$  NMR (300 MHz,  $\text{CDCl}_3$ ) of **48**

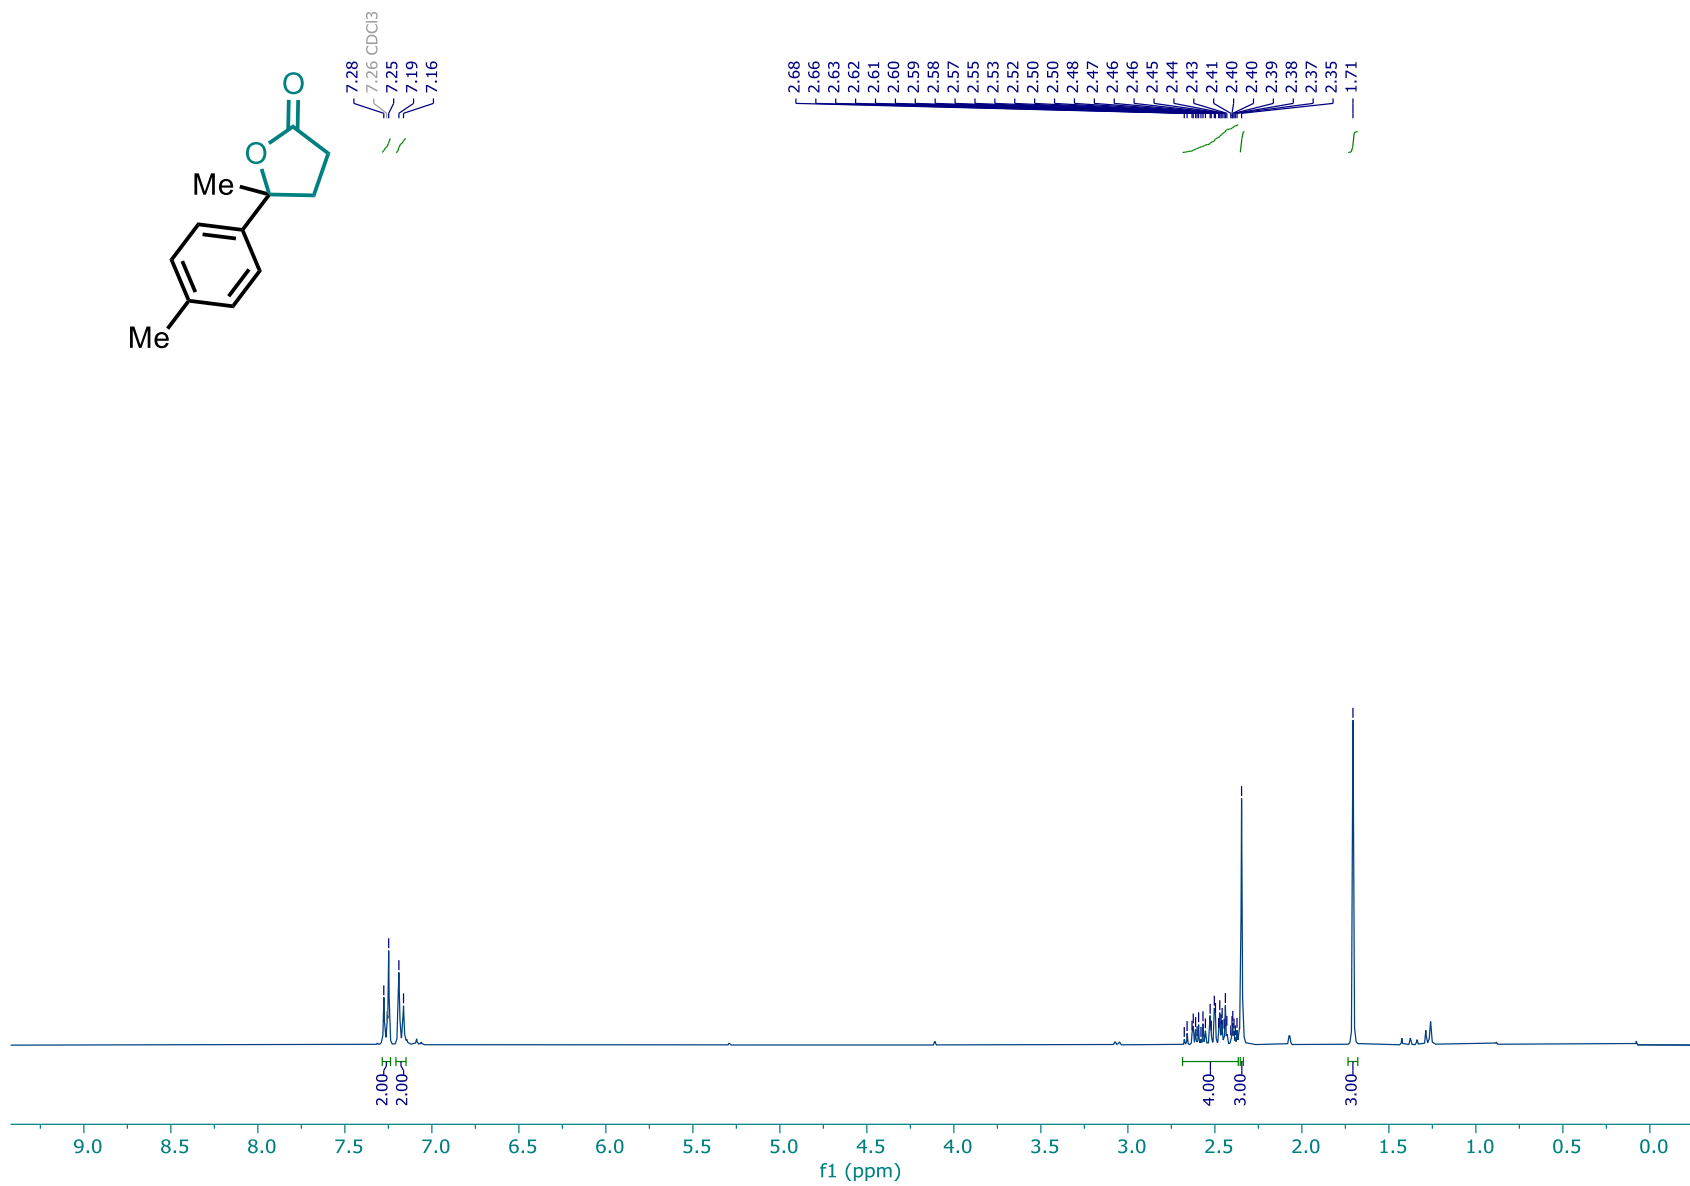

<sup>13</sup>C NMR (75 MHz, CDCl<sub>3</sub>) of **48**

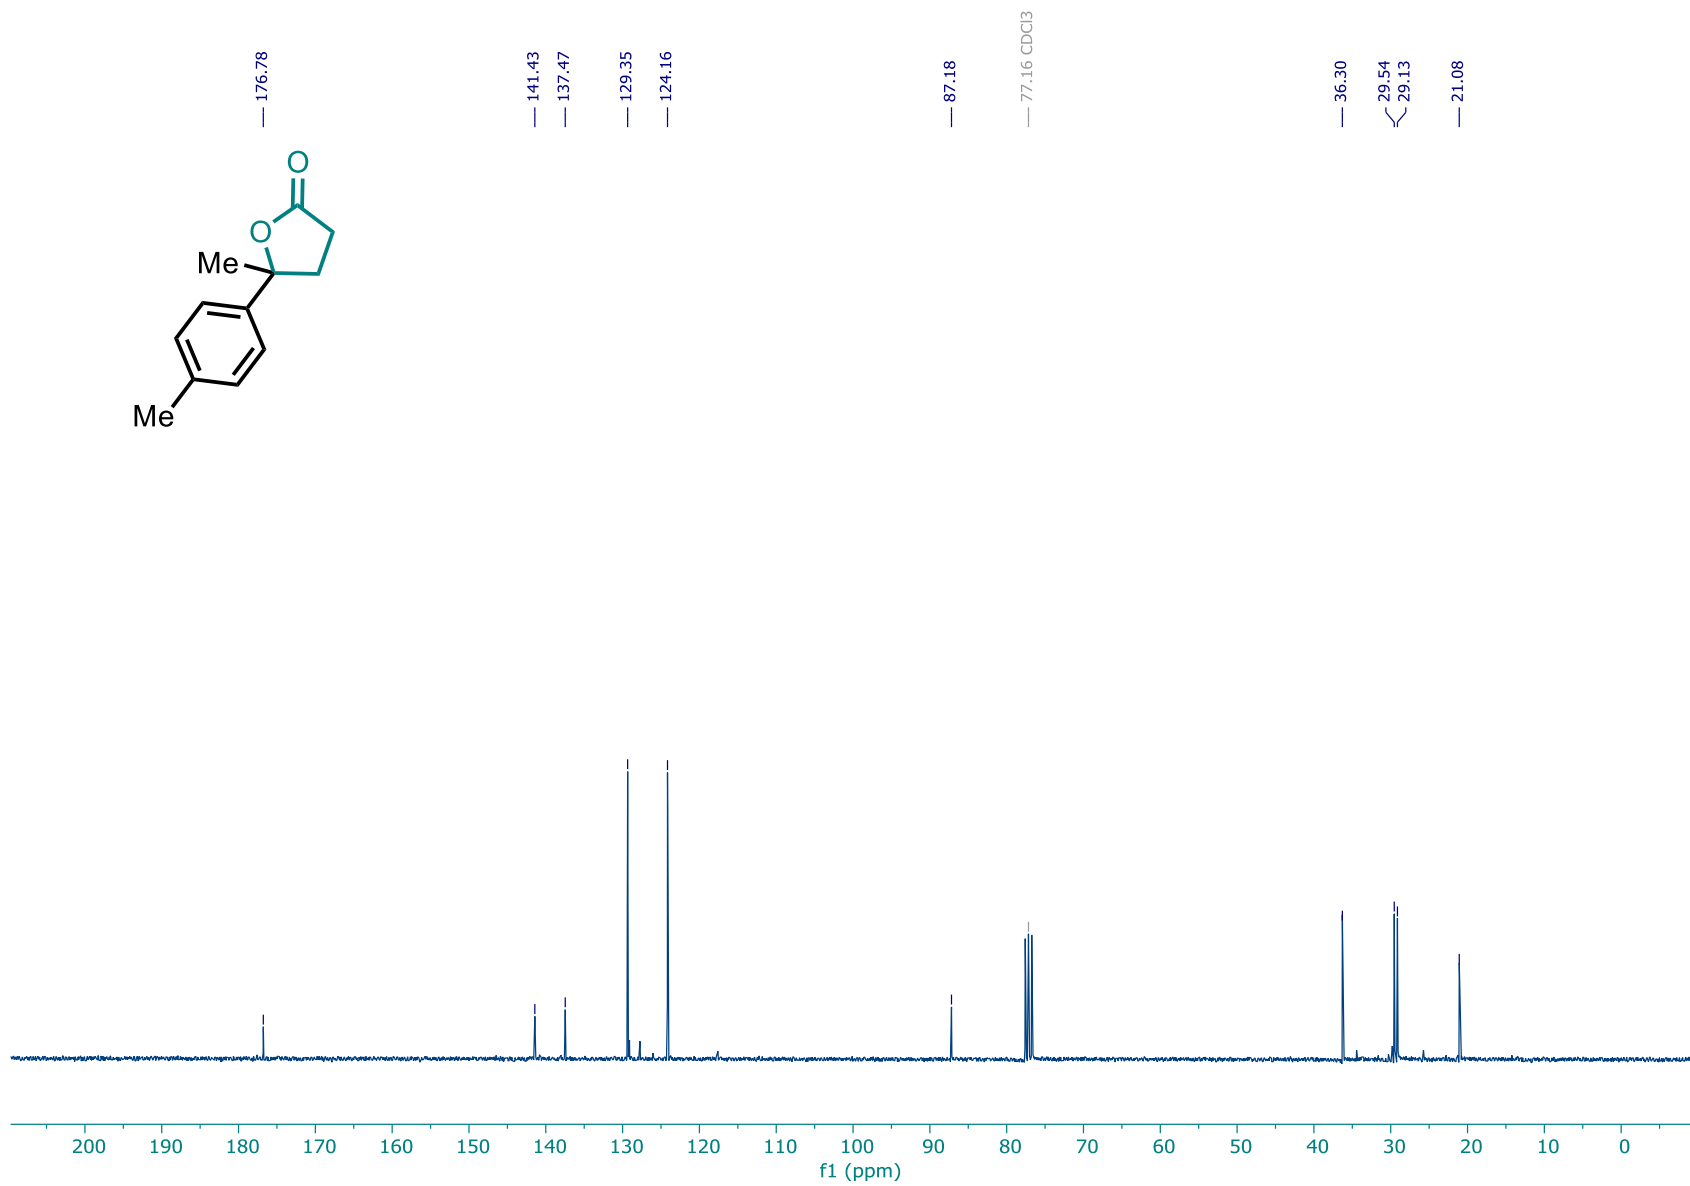

<sup>1</sup>H NMR (300 MHz, CDCl<sub>3</sub>) of **49**

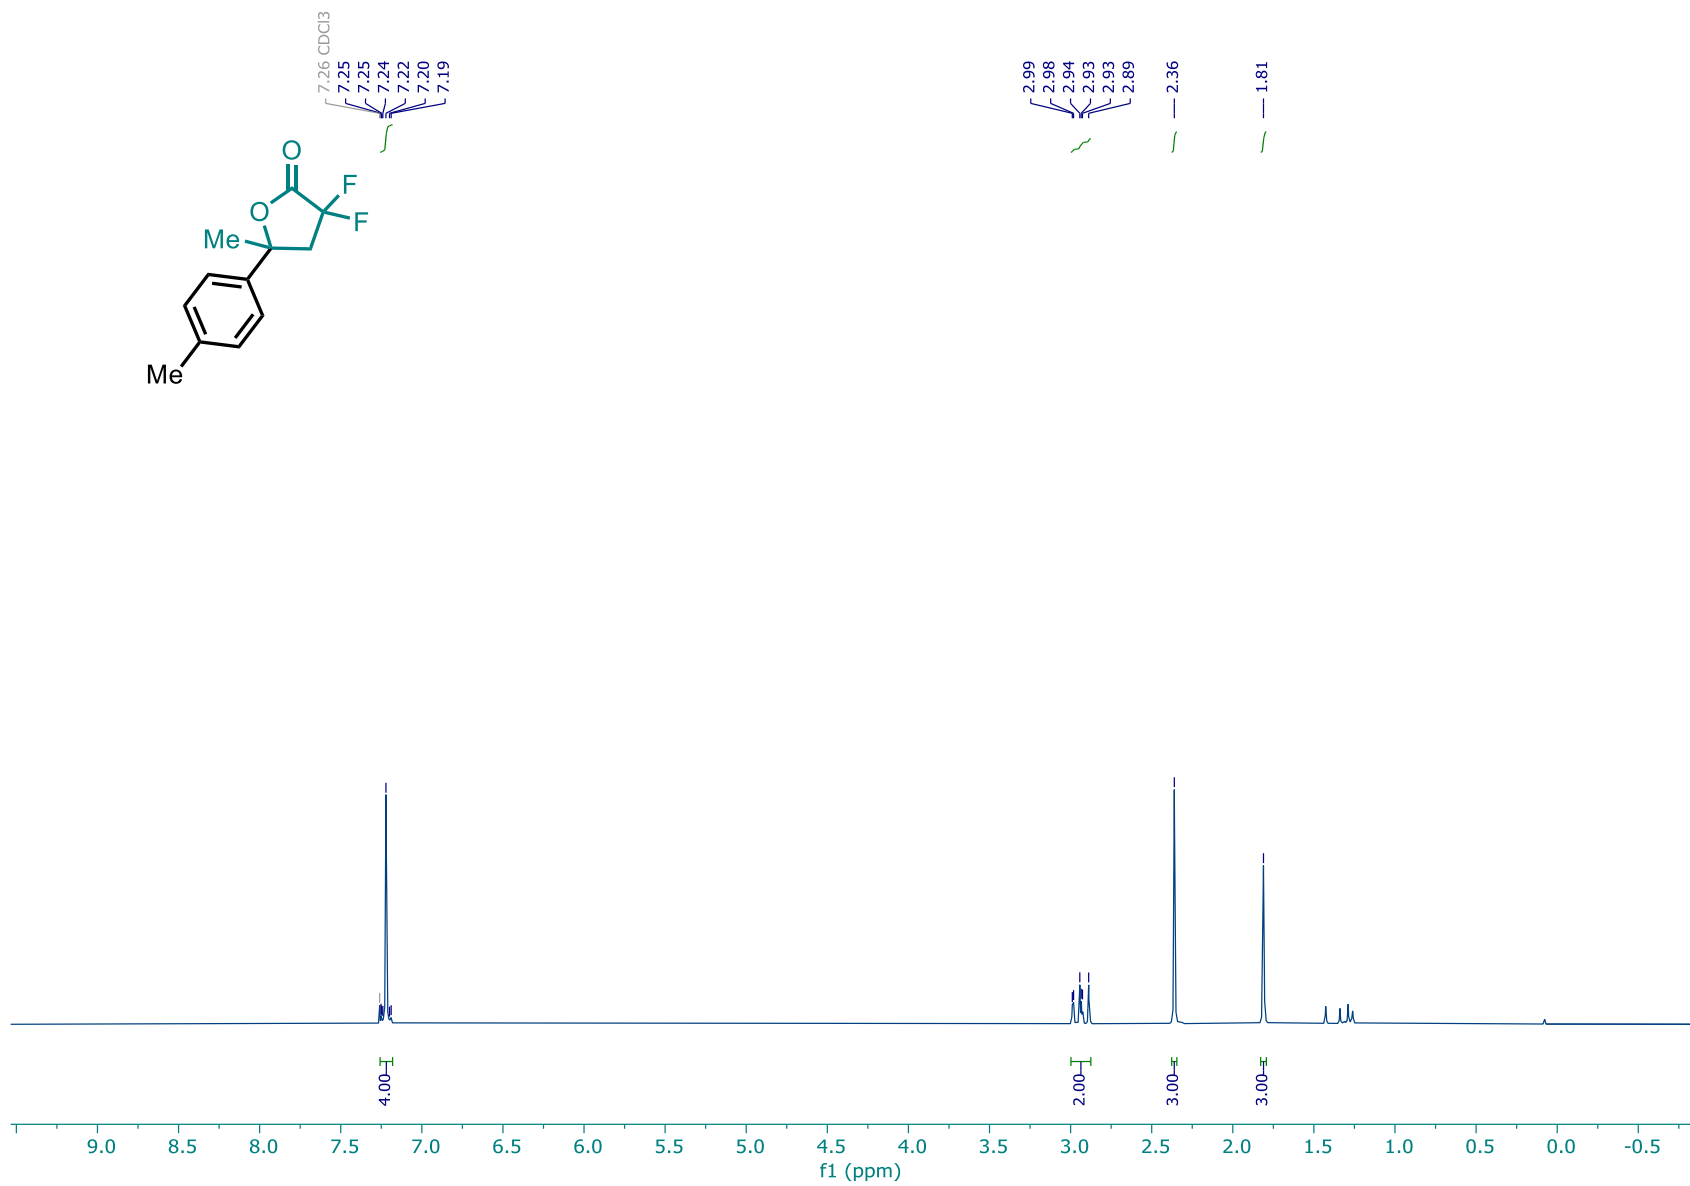



<sup>13</sup>C NMR (75 MHz, CDCl<sub>3</sub>) of **49**

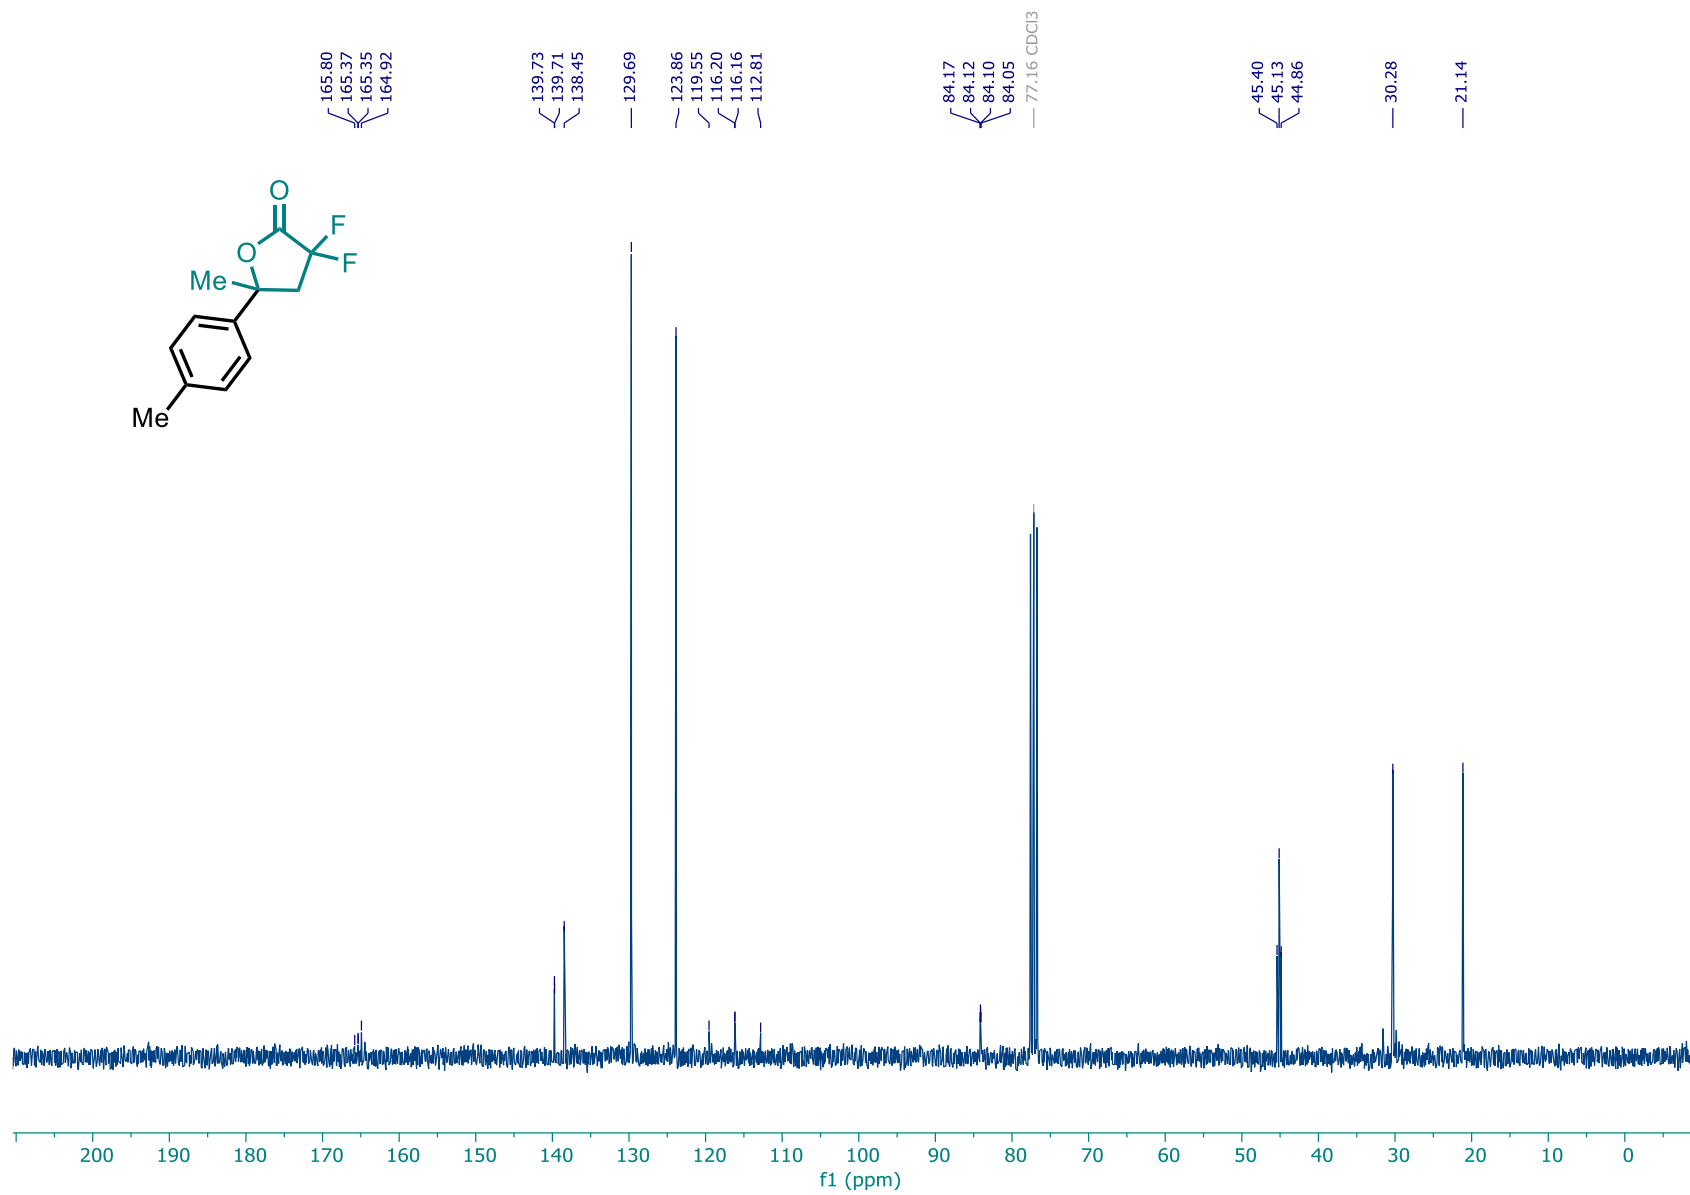

$^{19}\text{F}$  NMR (282 MHz,  $\text{CDCl}_3$ ) of **49**

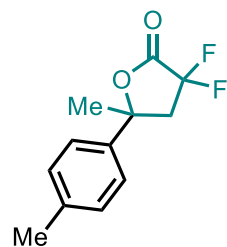

-101.26  
-102.25  
-104.33  
-105.33

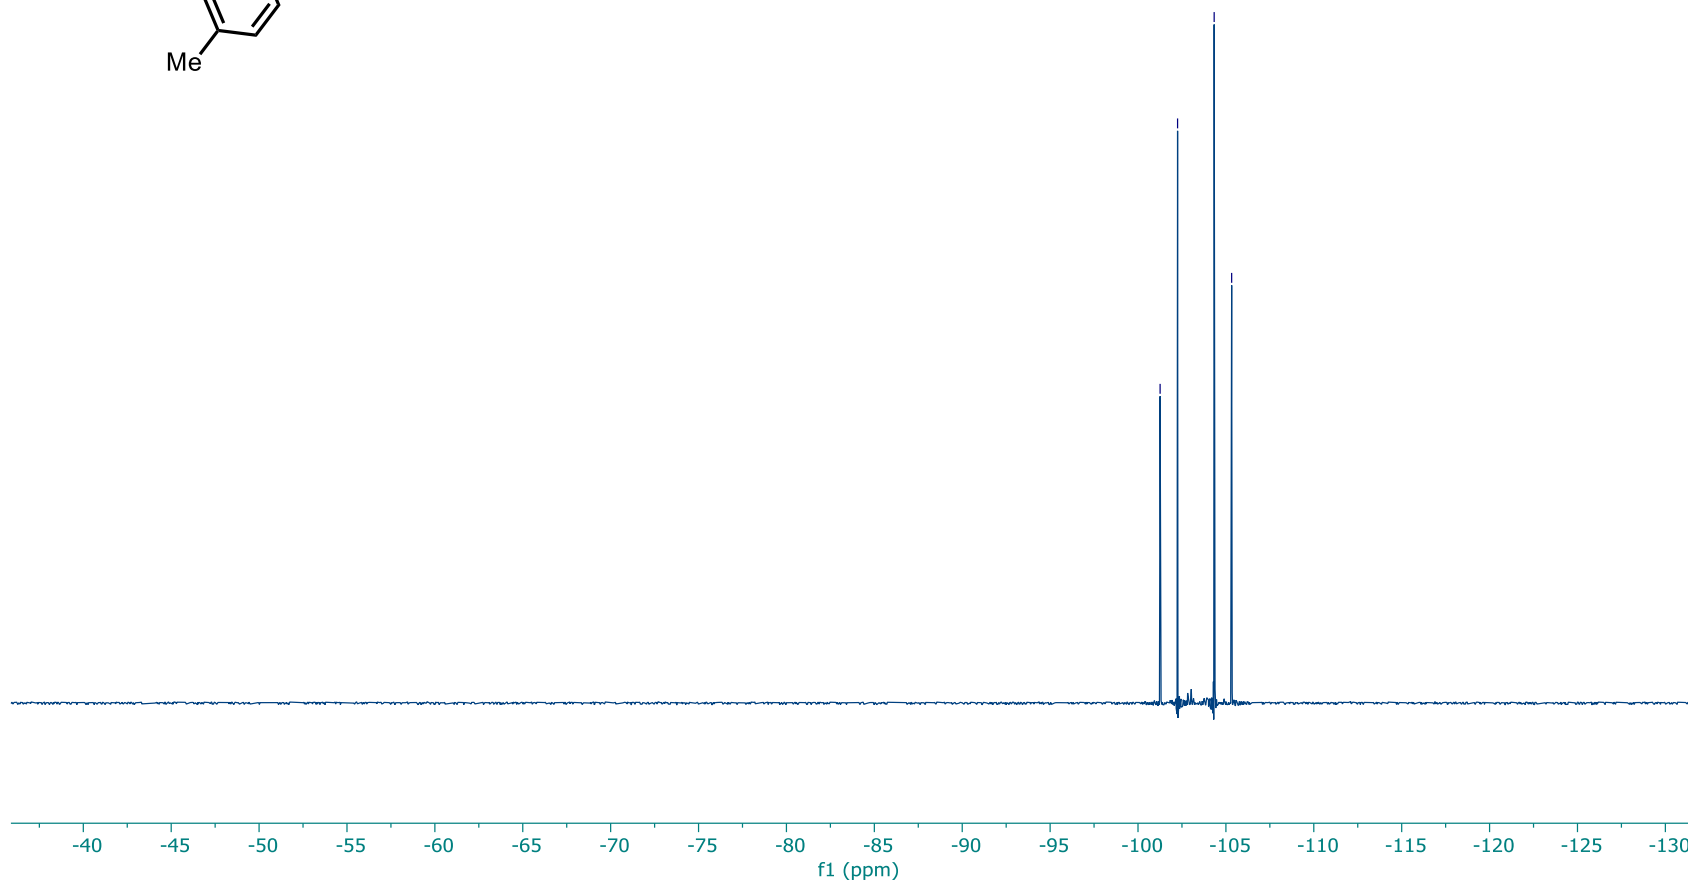

$^1\text{H}$  NMR (300 MHz,  $\text{CDCl}_3$ ) of **50**

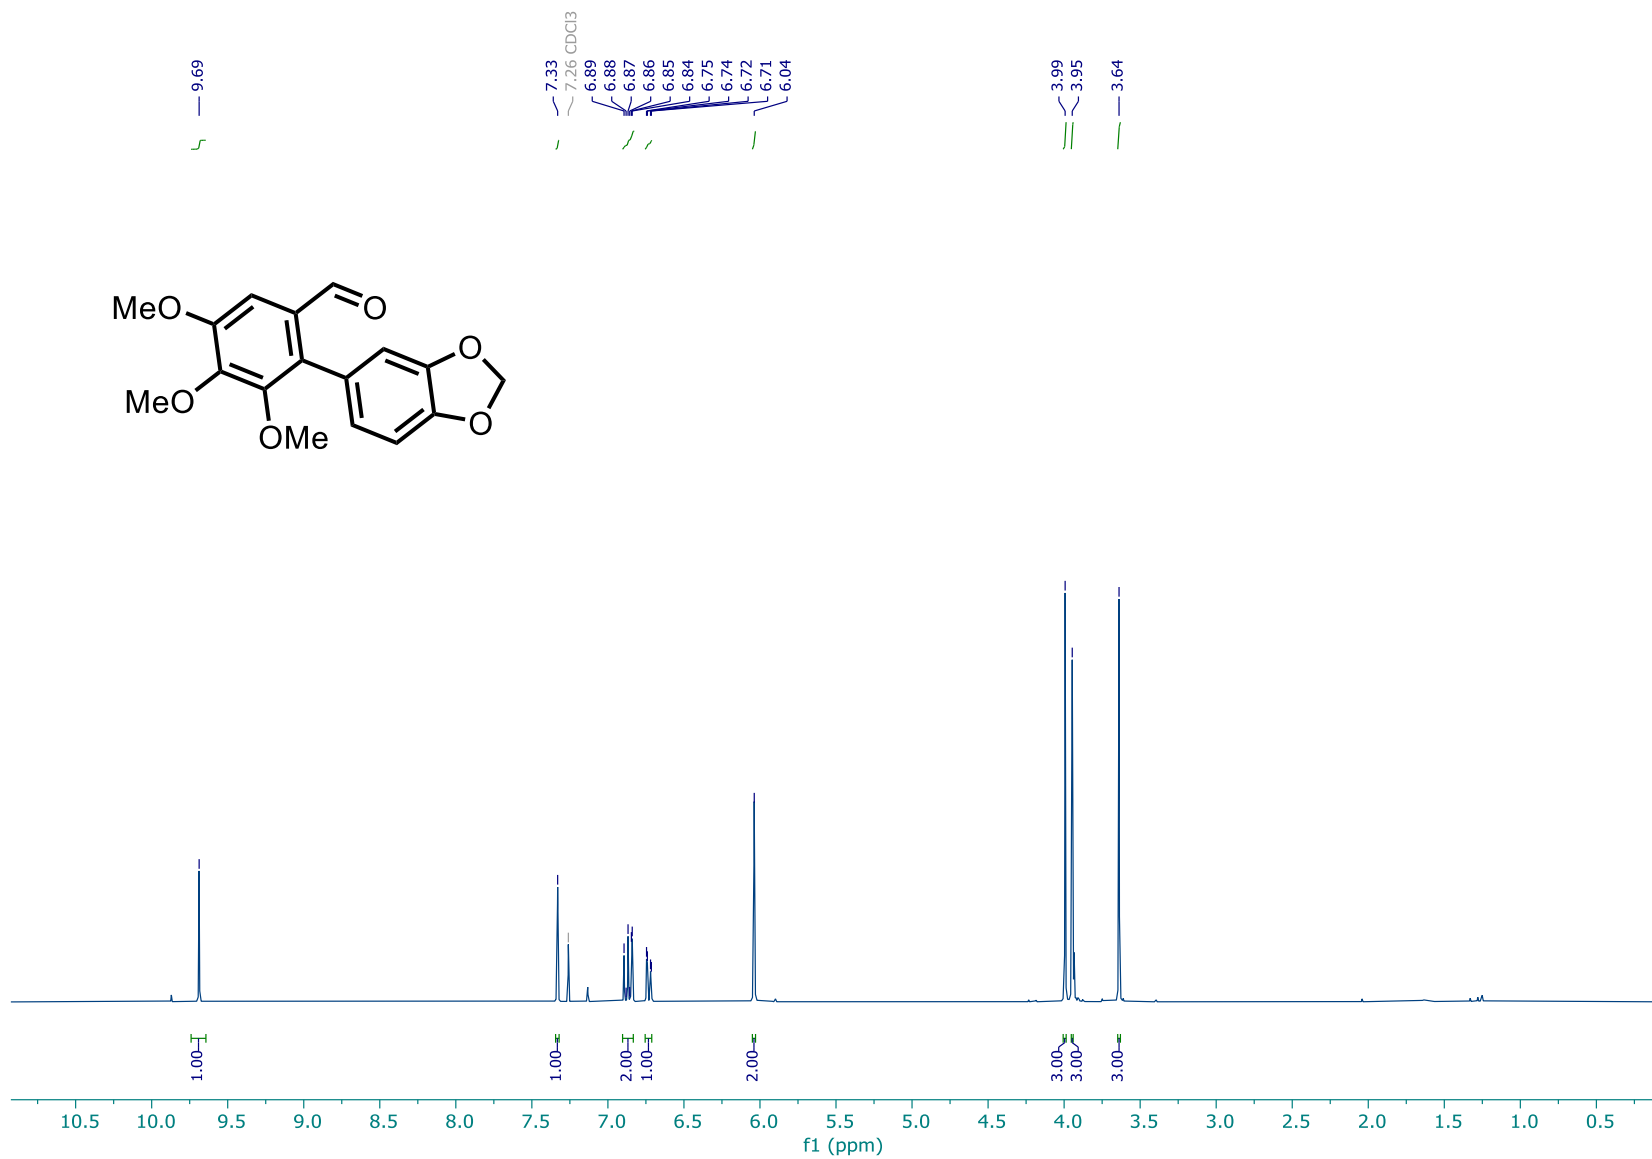

<sup>13</sup>C NMR (75 MHz, CDCl<sub>3</sub>) of **50**

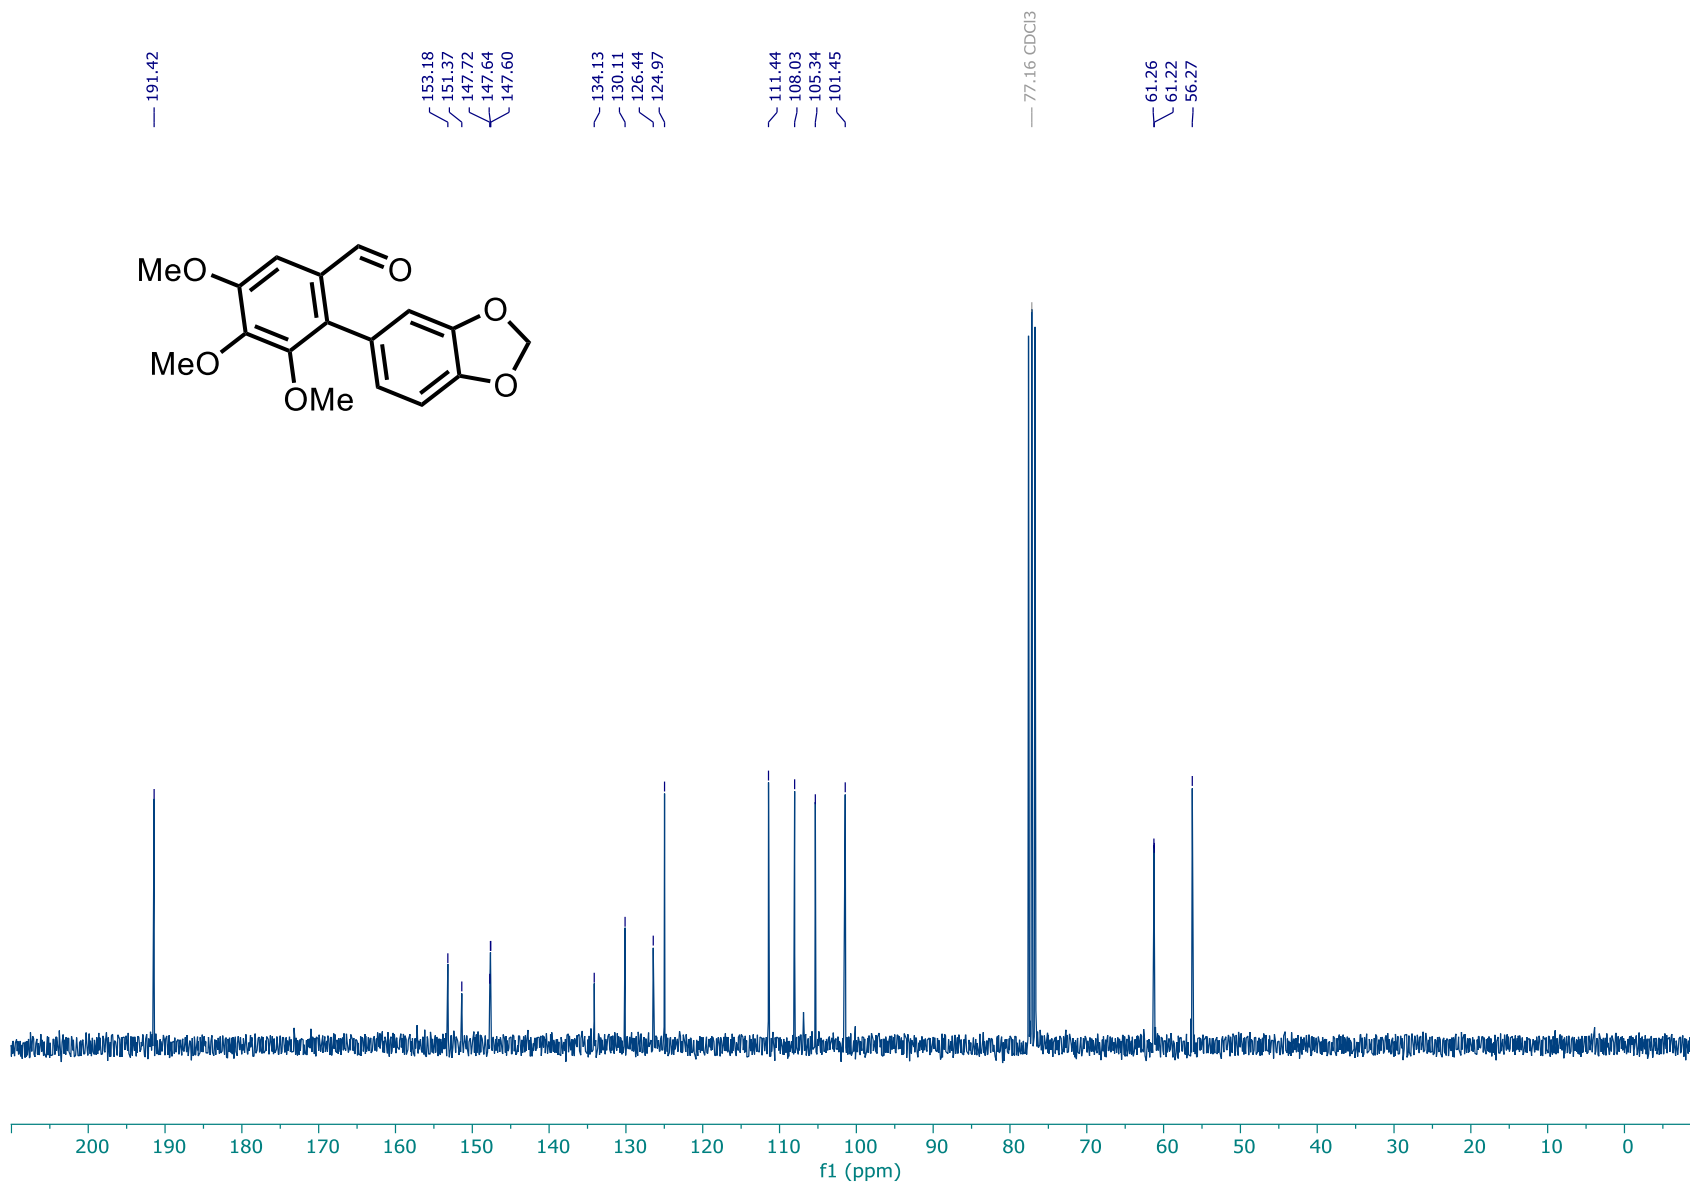

<sup>1</sup>H NMR (300 MHz, CDCl<sub>3</sub>) of **51**

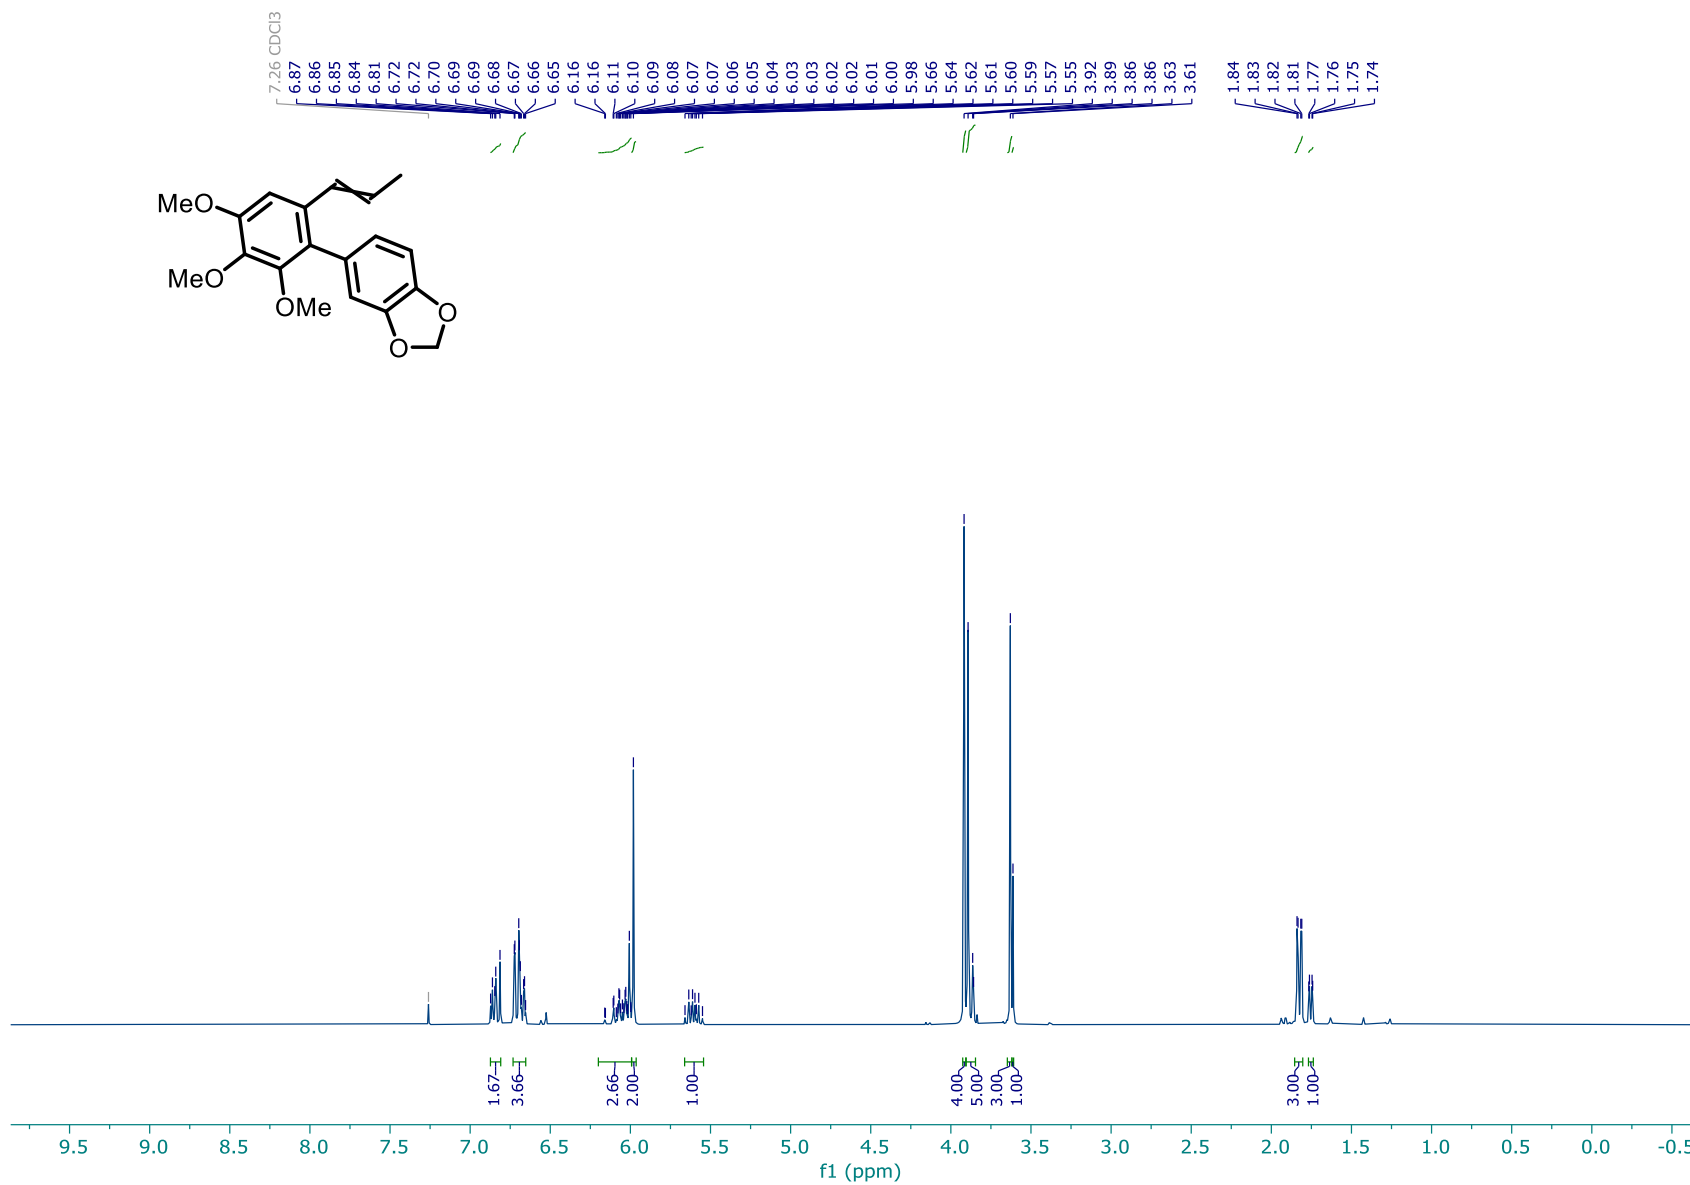

$^{13}\text{C}$  NMR (75 MHz,  $\text{CDCl}_3$ ) of **51**

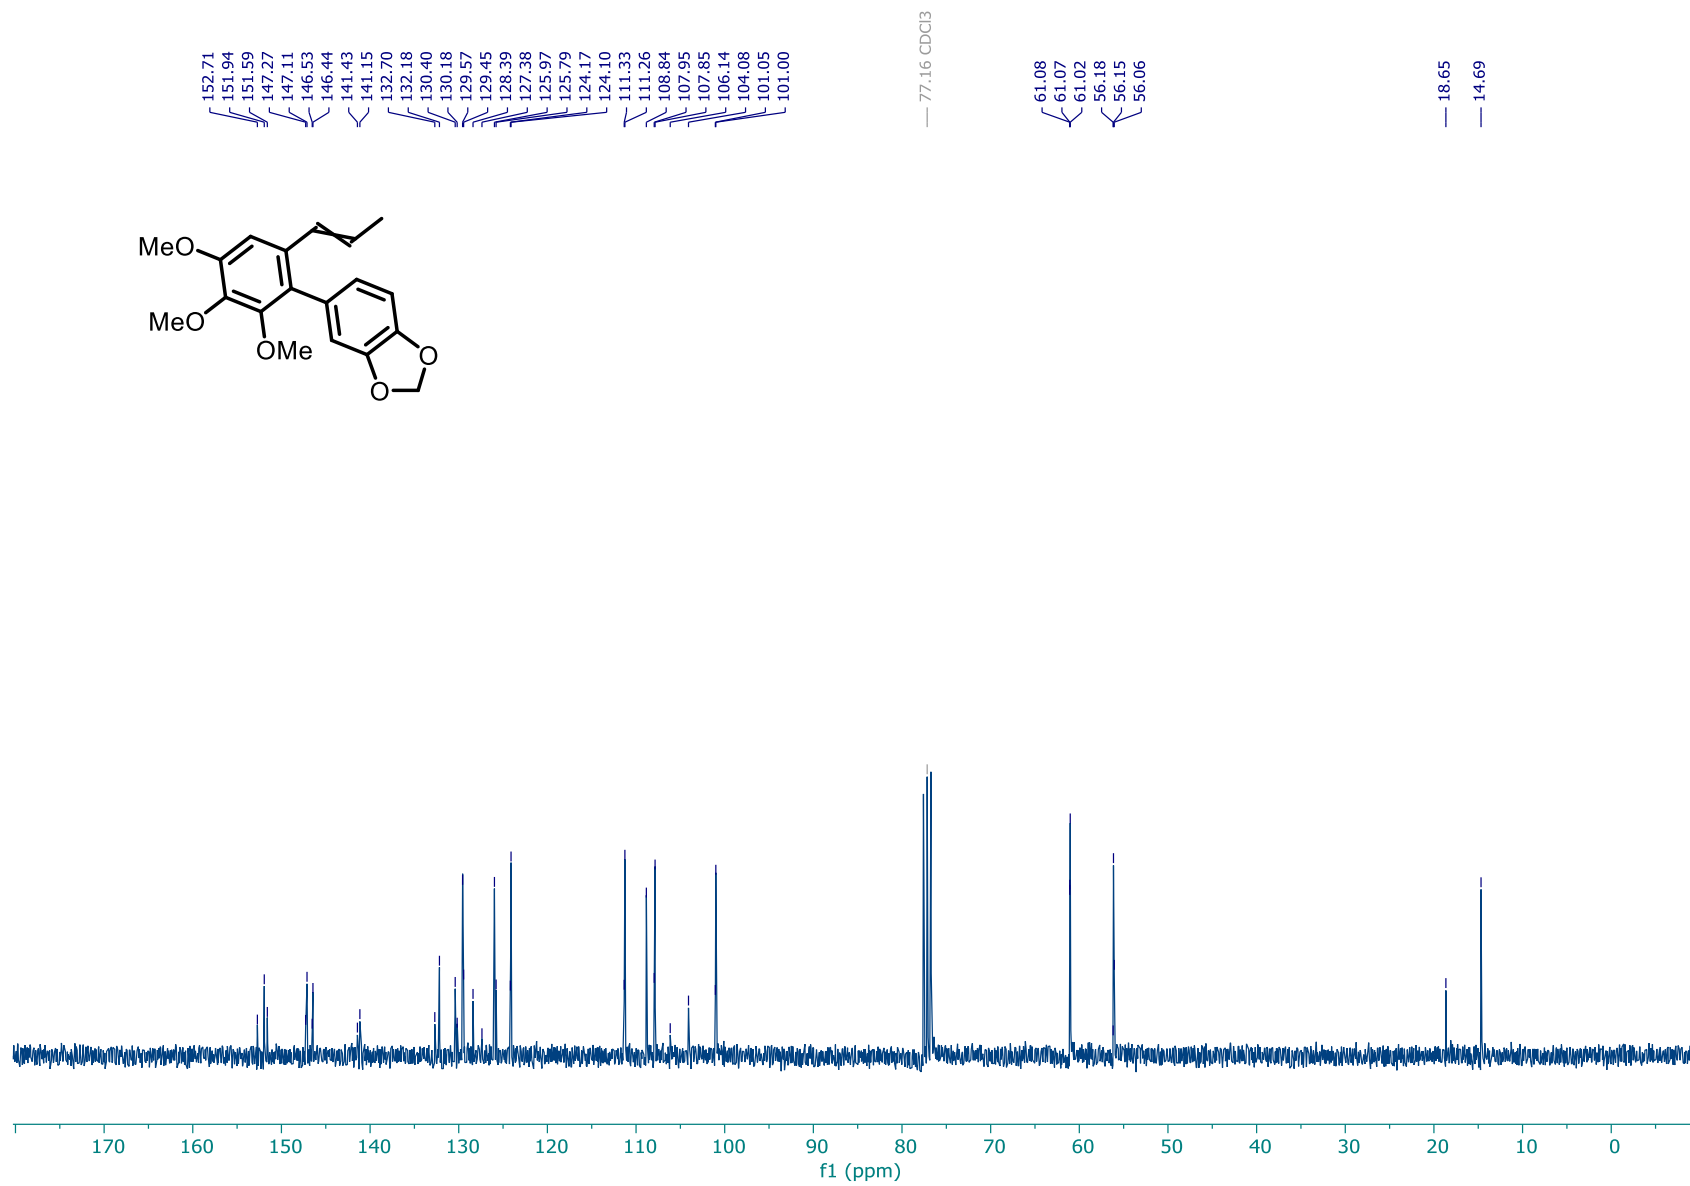

<sup>1</sup>H NMR (400 MHz, CDCl<sub>3</sub>) of **52**

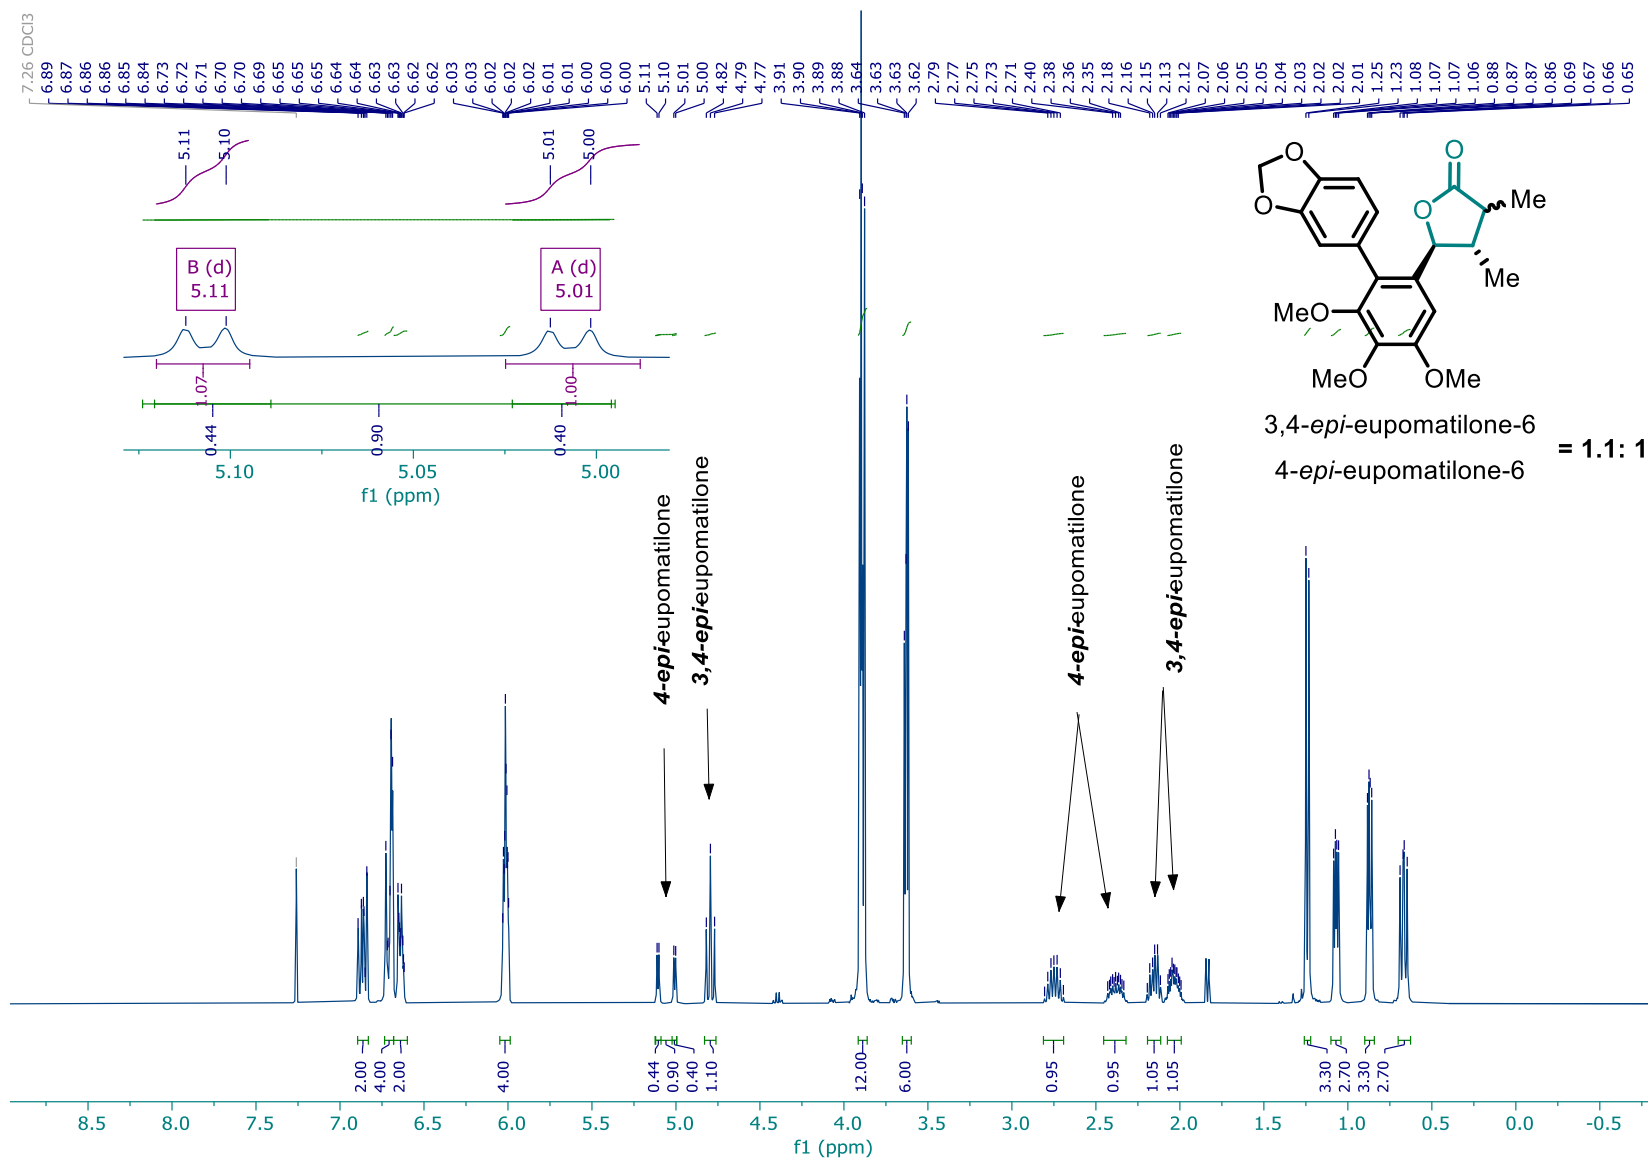

<sup>13</sup>C NMR (101 MHz, CDCl<sub>3</sub>) of **52**

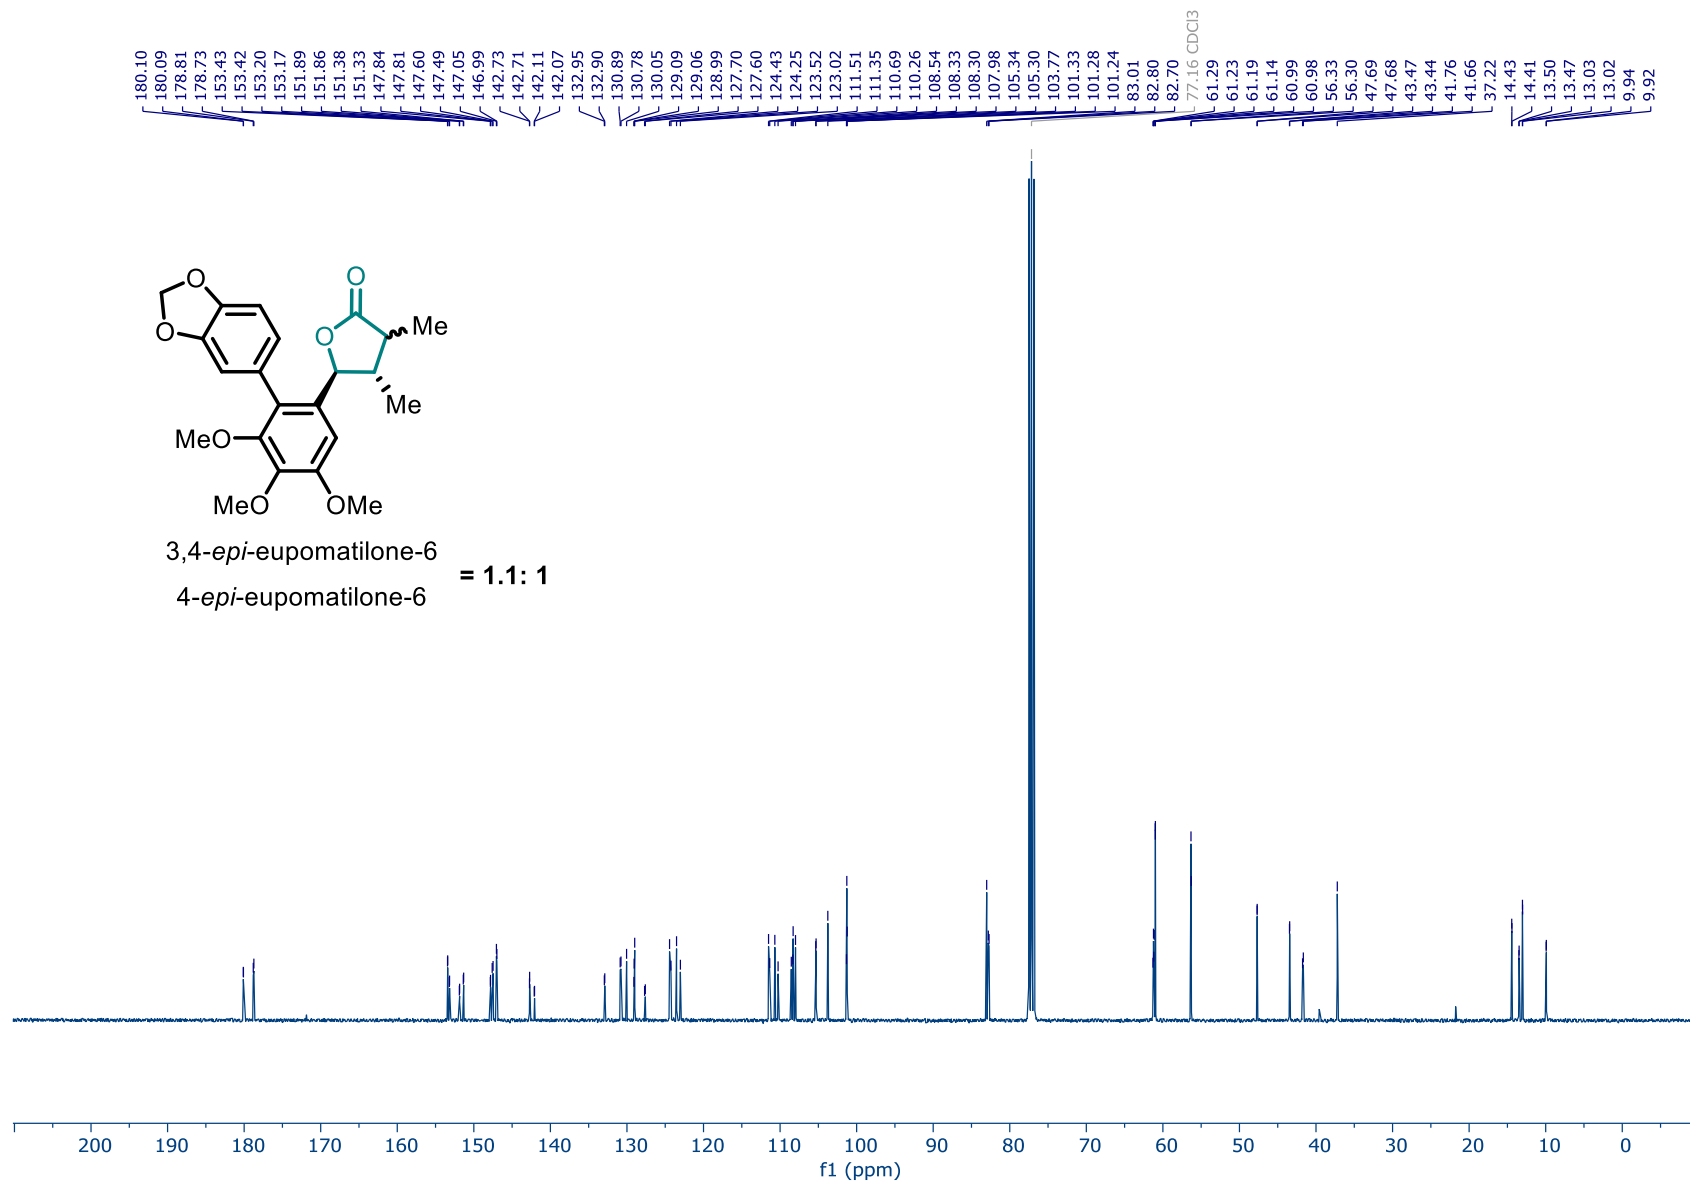



### 13. References

1. R. O. McCourt and E. M. Scanlan, *Org. Lett.*, 2019, **21**, 3460–3464.
2. J. L. Tu, W. Tang, W. Xu and F. Liu, *J. Org. Chem.*, 2021, **86**, 2929–2940.
3. S. Lauzon, H. Keipour, V. Gandon and T. Ollevier, *Org. Lett.*, 2017, **19**, 6324–6327.
4. C. Chatalova-Sazepin, Q. Wang, G. M. Sammis and J. Zhu, *Angew. Chem. Int. Ed.*, 2015, **54**, 5443–5446.
5. G. Z. Wang, R. Shang and Y. Fu, *Org. Lett.*, 2018, **20**, 888–891.
6. M. M. Amer, O. Olaizola, J. Carter, H. Abas and J. Clayden, *Org. Lett.*, 2020, **22**, 253–256.
7. Y. Chen, Y. Ma, L. Li, H. Jiang and Z. Li, *Org. Lett.*, 2019, **21**, 1480–1483.
8. a. S. Chen, J. Wang and L. G. Xie, *Org. Biomol. Chem.*, 2021, **19**, 4037–4042; b. D. A. Cruz, V. Sinka, P. de Armas, H. S. Steingruber, I. Fernández, V. S. Martín, P. O. Miranda and J. I. Padrón, *Org Lett*, 2021, **23**, 6105–6109.
9. G. J. Hedley, A. Ruseckas and I. D. W. Samuel, *Chem. Phys. Lett.*, 2008, **450**, 292–296.
10. K. C. Tang, K. L. Liu and I. C. Chen, *Chem. Phys. Lett.*, 2004, **386**, 437–441.
11. M. Kleinschmidt, C. van Wüllen and C. M. Marian, *J. Chem. Phys.*, 2015, **142**, 094301.
12. A. J. Fernandes, R. Giri, K. N. Houk and D. Katayev, *Angew. Chem. Int. Ed.*, 2024, e202318377.
13. R. Giri, I. Mosiagin, I. Franzoni, N. Yannick Nötel, S. Patra and D. Katayev, *Angew. Chem. Int. Ed.*, 2022, **61**, e202209143.
14. M. Zhang, Q. Li, J. H. Lin and J. C. Xiao, *Chin. J. Chem.*, 2023, **41**, 2819–2824.
15. V. S. Kostromitin, A. O. Sorokin, V. V Levin, and A. D. Dilman, *Chem. Sci.*, 2023,**14**, 3229-3234.
16. W. Yu, X. H. Xu and F. L. Qing, *Org Lett*, 2016, **18**, 5130–5133.
17. V. S. Kostromitin, A. O. Sorokin, V. V Levin, and A. D. Dilman, *Org. Lett.* 2023, **25**, 6598–6602.
18. R. Maji, S. Ghosh, O. Grossmann, P. Zhang, M. Leutzsch, N. Tsuji and B. List, *J. Am. Chem. Soc.*, 2023, **145**, 8788–8793
19. B. Sreedhar, D. Yada and P. S. Reddy *Adv. Synth. Catal.*, 2011, **353**, 2823 – 283
20. S. H. Yu, M. J. Ferguson, R. McDonald and D. G. Hall, *J. Am. Chem. Soc.*, 2005, **127**, 12808–12809..
21. Carroll R. Anthony and Taylor C. Walter, *Aust. J. Chem.*, 1991, **44**, 1705–1714.
22. Oxford Diffraction (2018). CrysAlisPro (Version 1.171.40.37a). Oxford Diffraction Ltd., Yarnton, Oxfordshire, UK.
23. G. M. Sheldrick, (2015). *Acta Cryst.*, **A71**, 3–8.
24. G. M. Sheldrick, (2015). *Acta Cryst.*, **C71**, 3–8.
25. Dolomanov, O.V., Bourhis, L.J., Gildea, R.J, Howard, J.A.K. and Puschmann, H. *J. Appl. Cryst.*, 2009, **42**, 339–341.
